# Supplementary material
Source: MDPI journal article supplement (https://www.mdpi.com/2673-8856/3/2/9)
Supplement: s1 [file s1]

Article

# Identification of Proteins Specifically Assembled on a Stem-Loop Composed of a CAG Triplet Repeat

Robert P. Fuchs <sup>1,2,\*</sup>, Asako Isogawa <sup>3</sup>, Joao A. Paulo <sup>4</sup> and Shingo Fujii <sup>3,\*</sup>

<sup>1</sup> Marseille Medical Genetics, UMR1251, 13005 Marseille, France

<sup>2</sup> Department of Biological Chemistry and Molecular Pharmacology, Harvard Medical School, Boston, MA 02115, USA

<sup>3</sup> Cancer Research Center of Marseille, CNRS, UMR7258, 13009 Marseille, France; asako.isogawa@inserm.fr

<sup>4</sup> Department of Cell Biology, Harvard Medical School, Boston, MA 02115, USA; joao\_paulo@hms.harvard.edu

\* Correspondence: roberpipo@gmail.com (R.P.F.); shingo.fujii@inserm.fr (S.F.)

## Supplementary Materials

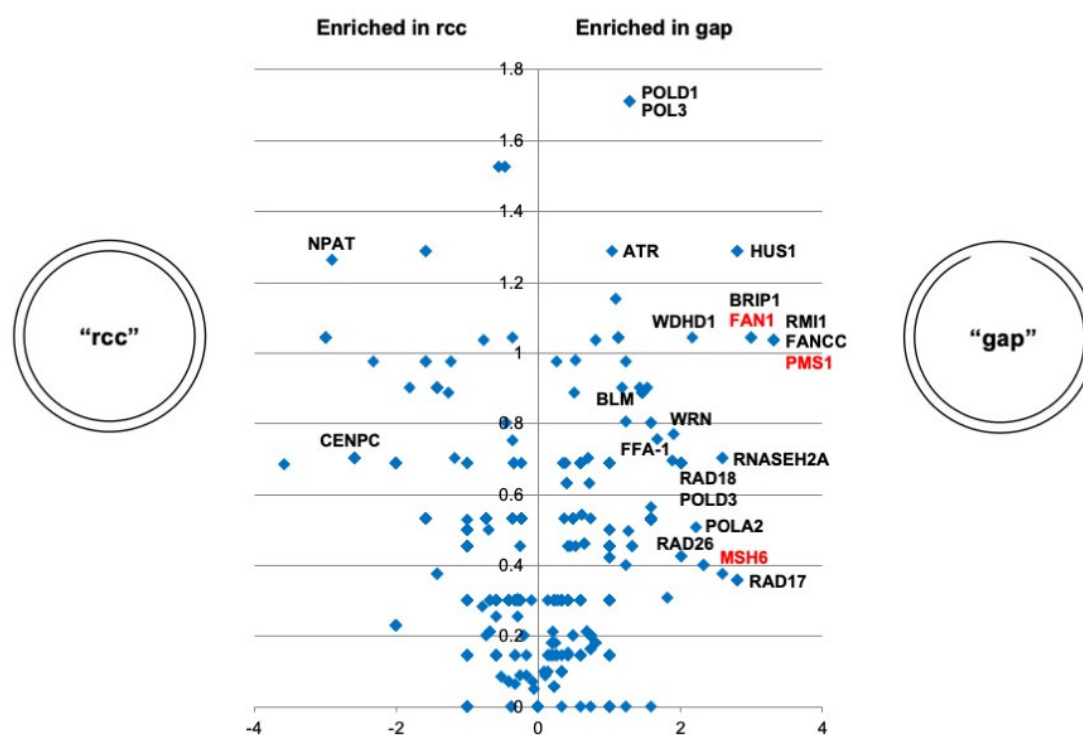

**Figure S1.** The volcano plot highlights proteins significantly enriched on pAS203(rcc) and pAS203(gap) on the left- and right-side of the y-axis, respectively. MMR proteins and FAN1 are highlighted in red. All proteins identified by MS analysis are listed in Table S1.

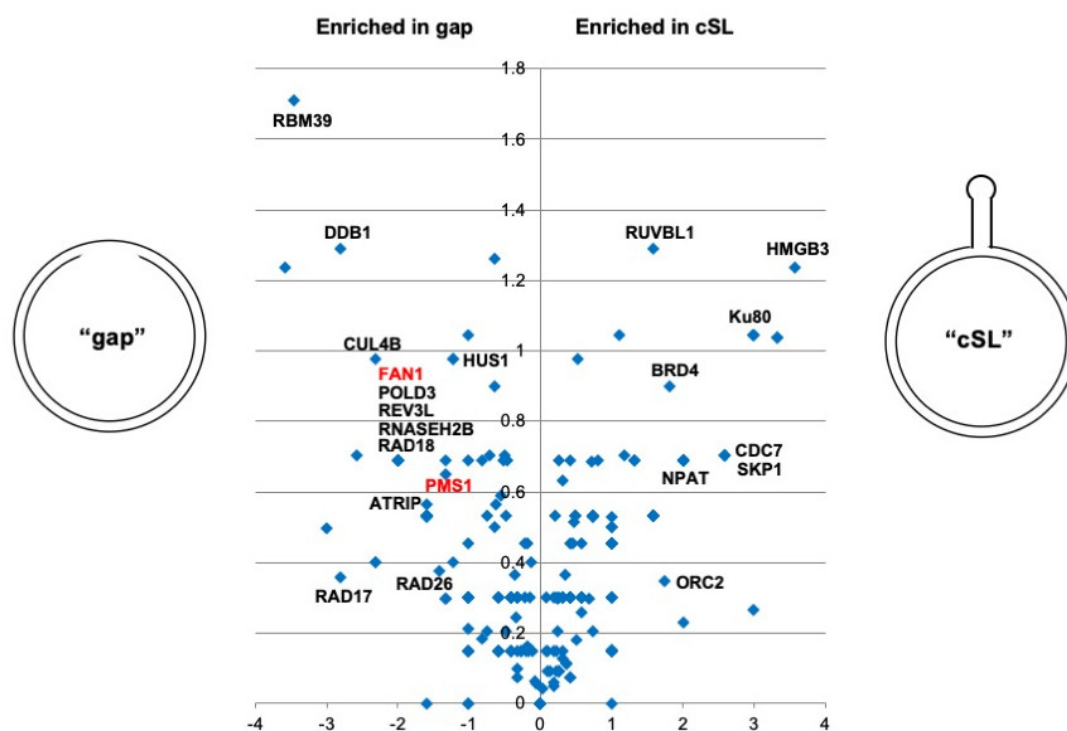

**Figure S2.** The volcano plot highlights proteins significantly enriched on pAS203(gap) and pAS203(cSL) on the left- and right-side of the y-axis, respectively. MMR proteins and FAN1 are indicated in red. All proteins identified in the MS analysis are listed in Table S1.
