# Supplementary material
Source: MDPI journal article supplement (https://www.mdpi.com/2673-8856/3/2/9)
Supplement: s1 [file s1]

Archive with 2 entries (2 files):
- dna-2363596-Supplementary Figures.pdf
- Table S1.xlsx
