# Supplementary material
Source: MDPI journal article supplement (https://www.mdpi.com/2673-8856/3/2/9)
Supplement: s1 [file s1 › Table S1.xlsx]

## Sheet: rcc vs cSL
Protein	Group ID	Collapsed?	Unique Peptides	Razor Peptides	Gene	Description	SeqLen	A1-187	A2-189	B1-195	B2-197	C1-201	C2-203	moyA	moyC	C/A	log2 C/A	p (C/A)	log10 p(C/A)
tr|Q6PAX0|Q6PAX0_XENLA	213	C	10	0	brip1	MGC68622 protein OS=Xenopus laevis GN=brip1 PE=2 SV=1	713	0.5	0	2	2	4	2	0.25	3	12	3.58496	0.205449	0.687296		Sample A: rcc
tr|Q9W627|Q9W627_XENLA	288	C	0	4		Ku80 autoantigen homologue (Fragment) OS=Xenopus laevis PE=2 SV=1	726	0.5	0	0.5	0	2	2	0.25	2	8	3	0.0903345	1.04415		Sample B: gap
tr|Q6DDS9|Q6DDS9_XENLA	288		0	0	xrcc5	X-ray repair cross-complementing protein 5 OS=Xenopus laevis GN=xrcc5 PE=2 SV=1	726	0.5	0	0.5	0	2	2	0.25	2	8	3	0.0903345	1.04415		Sample C: cSL
tr|Q6AZR6|Q6AZR6_XENLA	7	C	1	3	xrcc6	LOC398357 protein OS=Xenopus laevis GN=xrcc6 PE=2 SV=1	611	0.5	0	0.5	0	4	0	0.25	2	8	3	0.541249	0.266603
sp|Q6DDH2|RMI1_XENLA	93	C	9	0	rmi1	RecQ-mediated genome instability protein 1 OS=Xenopus laevis GN=rmi1 PE=2 SV=1	557	0.5	0	2	3	4	0	0.25	2	8	3	0.541249	0.266603
tr|Q90W61|Q90W61_XENLA	50		0	0	hira	HIRA protein (Fragment) OS=Xenopus laevis GN=hira PE=2 SV=1	28	0.5	0	1	1	2	1	0.25	1.5	6	2.58496	0.198727	0.701742
tr|D2CGM1|D2CGM1_XENLA	153	C	8	0	fancc	Fanconi anemia complementation group C OS=Xenopus laevis GN=fancc PE=2 SV=1	541	0.5	0	2	3	2	1	0.25	1.5	6	2.58496	0.198727	0.701742
tr|Q9PWM7|Q9PWM7_XENLA	217	C	0	3	cdc7	Protein kinase Cdc7 OS=Xenopus laevis GN=cdc7 PE=2 SV=1	483	0.5	0	0.5	0	2	1	0.25	1.5	6	2.58496	0.198727	0.701742
tr|O13045|O13045_XENLA	217		0	0		Cdc7-related kinase OS=Xenopus laevis PE=2 SV=1	483	0.5	0	0.5	0	2	1	0.25	1.5	6	2.58496	0.198727	0.701742
tr|Q7ZYE9|Q7ZYE9_XENLA	202	C	1	3	hnrnpab	Hnrpab-prov protein OS=Xenopus laevis GN=hnrnpab PE=1 SV=1	324	0.5	0	0.5	1	1	2	0.25	1.5	6	2.58496	0.198727	0.701742
sp|Q71U00|SKP1_XENLA	270	C	3	0	skp1	S-phase kinase-associated protein 1 OS=Xenopus laevis GN=skp1 PE=1 SV=3	163	0.5	0	0.5	0	1	2	0.25	1.5	6	2.58496	0.198727	0.701742
tr|Q9W626|Q9W626_XENLA	7		0	0		Ku70 autoantigen homologue (Fragment) OS=Xenopus laevis PE=2 SV=1	611	0.5	0	0.5	0	3	0	0.25	1.5	6	2.58496	0.556069	0.254872
sp|Q6DFF2|BRD4B_XENLA	56	C	4	0	brd4-b	Bromodomain-containing protein 4B OS=Xenopus laevis GN=brd4-b PE=2 SV=1	1362	2	1	2	2	8	6	1.5	7	4.66667	2.22239	0.0692862	1.15935
tr|A1L1G8|A1L1G8_XENLA	56	C	2	0	brd3	LOC100036838 protein OS=Xenopus laevis GN=brd3 PE=2 SV=1	783	0.5	0	0.5	1	1	1	0.25	1	4	2	0.204833	0.688601
tr|Q5XGT4|Q5XGT4_XENLA	107		0	0	krt5.2	LOC495267 protein OS=Xenopus laevis GN=krt5.2 PE=2 SV=1	590	0.5	0	0.5	0	1	1	0.25	1	4	2	0.204833	0.688601
sp|Q569M3|CENPA_XENLA	123		0	0	cenpa	Histone H3-like centromeric protein A OS=Xenopus laevis GN=cenpa PE=2 SV=1	150	0.5	0	0.5	1	1	1	0.25	1	4	2	0.204833	0.688601
tr|Q7ZXV9|Q7ZXV9_XENLA	128	C	7	0	pms1	Pms1 protein OS=Xenopus laevis GN=pms1 PE=2 SV=1	925	0.5	0	3	2	1	1	0.25	1	4	2	0.204833	0.688601
tr|Q6GM69|Q6GM69_XENLA	202		0	0		Uncharacterized protein OS=Xenopus laevis PE=2 SV=1	326	0.5	0	0.5	1	1	1	0.25	1	4	2	0.204833	0.688601
tr|Q98UD3|Q98UD3_XENLA	202		0	0		CArG-binding factor A (Fragment) OS=Xenopus laevis PE=2 SV=1	131	0.5	0	0.5	1	1	1	0.25	1	4	2	0.204833	0.688601
tr|B7ZSA0|B7ZSA0_XENLA	227		0	0	xak-a	Adult keratin XAK-A OS=Xenopus laevis GN=xak-a PE=2 SV=1	414	0.5	0	1	1	1	1	0.25	1	4	2	0.204833	0.688601
tr|Q98UJ2|Q98UJ2_XENLA	227		0	0	krt24	Adult keratin XAK-A OS=Xenopus laevis GN=krt24 PE=2 SV=1	414	0.5	0	1	1	1	1	0.25	1	4	2	0.204833	0.688601
sp|Q9DEI1|PRKDC_XENLA	236	C	2	0	prkdc	DNA-dependent protein kinase catalytic subunit OS=Xenopus laevis GN=prkdc PE=2 SV=1	4146	0.5	0	0.5	0	1	1	0.25	1	4	2	0.204833	0.688601
tr|Q8JGN6|Q8JGN6_XENLA	260	C	0	3		Protein inhibitor of activated STAT1 OS=Xenopus laevis PE=2 SV=1	649	0.5	0	0.5	1	1	1	0.25	1	4	2	0.204833	0.688601
tr|Q5XHH3|Q5XHH3_XENLA	260		0	0	pias1	Pias1-A protein OS=Xenopus laevis GN=pias1 PE=2 SV=1	649	0.5	0	0.5	1	1	1	0.25	1	4	2	0.204833	0.688601
tr|Q6GMA8|Q6GMA8_XENLA	260		0	0	pias3	MGC81944 protein OS=Xenopus laevis GN=pias3 PE=2 SV=1	633	0.5	0	0.5	1	1	1	0.25	1	4	2	0.204833	0.688601
tr|Q6IRN4|Q6IRN4_XENLA	260		0	0	pias2	MGC83751 protein OS=Xenopus laevis GN=pias2 PE=2 SV=1	584	0.5	0	0.5	1	1	1	0.25	1	4	2	0.204833	0.688601
sp|Q6NRP2|PSME4_XENLA	278	C	0	2	psme4	Proteasome activator complex subunit 4 OS=Xenopus laevis GN=psme4 PE=2 SV=1	1828	0.5	0	0.5	0	1	1	0.25	1	4	2	0.204833	0.688601
tr|Q68FC4|Q68FC4_XENLA	278		0	0	fam107b	MGC78851 protein OS=Xenopus laevis GN=fam107b PE=2 SV=1	131	0.5	0	0.5	0	1	1	0.25	1	4	2	0.204833	0.688601
tr|Q6GPP8|Q6GPP8_XENLA	311	C	4	0	hba-l5	MGC82702 protein OS=Xenopus laevis GN=hba-l5 PE=2 SV=1	139	0.5	0	1	1	1	1	0.25	1	4	2	0.204833	0.688601
tr|Q6NU65|Q6NU65_XENLA	17	C	4	0	rnaseh1	Ribonuclease H1 OS=Xenopus laevis GN=rnaseh1 PE=2 SV=1	300	0.5	0	1	1	2	0	0.25	1	4	2	0.588295	0.230405
sp|Q5BP74|KC1D_XENLA	156	C	0	4	csnk1d	Casein kinase I isoform delta OS=Xenopus laevis GN=csnk1d PE=1 SV=2	415	0.5	0	1	1	2	0	0.25	1	4	2	0.588295	0.230405
tr|Q9PUI2|Q9PUI2_XENLA	156		0	0	csnk1e	CKIe protein OS=Xenopus laevis GN=csnk1e PE=2 SV=1	416	0.5	0	1	1	2	0	0.25	1	4	2	0.588295	0.230405
tr|Q6DFB2|Q6DFB2_XENLA	261	C	3	0	ercc4	Ercc4-prov protein OS=Xenopus laevis GN=ercc4 PE=2 SV=1	897	0.5	0	0.5	1	2	0	0.25	1	4	2	0.588295	0.230405
sp|O42226|I4A3B_XENLA	269	C	0	2	eif4a3-b	Eukaryotic initiation factor 4A-III-B OS=Xenopus laevis GN=eif4a3-b PE=2 SV=1	414	0.5	0	0.5	0	2	0	0.25	1	4	2	0.588295	0.230405
sp|Q5U526|I4A3A_XENLA	269		0	0	eif4a3-a	Eukaryotic initiation factor 4A-III-A OS=Xenopus laevis GN=eif4a3-a PE=2 SV=1	415	0.5	0	0.5	0	2	0	0.25	1	4	2	0.588295	0.230405
sp|O93530|WRN_XENLA	51		0	0	wrn	Werner syndrome ATP-dependent helicase homolog OS=Xenopus laevis GN=wrn PE=2 SV=1	1436	4	4	12	18	17	14	4	15.5	3.875	1.9542	0.0825712	1.08317
tr|Q5HZF7|Q5HZF7_XENLA	44	C	15	0	MSH2	MSH2 protein (Fragment) OS=Xenopus laevis GN=MSH2 PE=2 SV=1	676	1	1	2	4	3	4	1	3.5	3.5	1.80735	0.125666	0.900782
tr|Q6DCZ1|Q6DCZ1_XENLA	86	C	13	0	pola2	DNA polymerase alpha subunit B OS=Xenopus laevis GN=pola2 PE=2 SV=1	598	0.5	1	2	5	3	2	0.75	2.5	3.33333	1.73697	0.129048	0.889249
tr|Q6GPM6|Q6GPM6_XENLA	51	C	13	69	FFA-1	FFA-1 protein OS=Xenopus laevis GN=FFA-1 PE=2 SV=1	1434	5	6	14	21	19	17	5.5	18	3.27273	1.71049	0.0212375	1.6729
sp|Q9DEY9|BLM_XENLA	15	C	20	6	blm	Bloom syndrome protein homolog OS=Xenopus laevis GN=blm PE=2 SV=1	1364	2	2	4	5	7	6	2	6.5	3.25	1.70044	0.0704466	1.15214
tr|Q1XCD9|Q1XCD9_XENLA	225	C	8	0	hmgb3	High mobility group B3b protein OS=Xenopus laevis GN=hmgb3 PE=2 SV=1	201	1	1	0.5	0	3	3	1	3	3	1.58496	#DIV/0!	#DIV/0!
tr|Q6NTQ1|Q6NTQ1_XENLA	135	C	18	0	MGC83104	MGC83104 protein OS=Xenopus laevis GN=MGC83104 PE=2 SV=1	797	2	1	2	4	5	4	1.5	4.5	3	1.58496	0.0513167	1.28974
tr|Q8JHD8|Q8JHD8_XENLA	201	C	0	11	Hus1	Checkpoint protein Hus1 OS=Xenopus laevis GN=Hus1 PE=2 SV=1	282	1	0	4	3	2	1	0.5	1.5	3	1.58496	0.292893	0.533291
tr|Q7ZTA4|Q7ZTA4_XENLA	201		0	0	hus1	Hus1 protein OS=Xenopus laevis GN=hus1 PE=2 SV=1	282	1	0	4	3	2	1	0.5	1.5	3	1.58496	0.292893	0.533291
sp|Q9W758|CTBP2_XENLA	21	C	4	0	ctbp2	C-terminal-binding protein 2 OS=Xenopus laevis GN=ctbp2 PE=1 SV=1	437	1	0	0.5	0	1	2	0.5	1.5	3	1.58496	0.292893	0.533291
tr|Q6NRV0|Q6NRV0_XENLA	154	C	1	0	traip	MGC81341 protein OS=Xenopus laevis GN=traip PE=2 SV=1	464	0.5	0	0.5	0	0.5	1	0.25	0.75	3	1.58496	0.292893	0.533291
tr|Q6GPS9|Q6GPS9_XENLA	204	C	1	0	hadha	MGC82638 protein OS=Xenopus laevis GN=hadha PE=2 SV=1	760	0.5	0	0.5	0	0.5	1	0.25	0.75	3	1.58496	0.292893	0.533291
tr|Q09044|Q09044_XENLA	216	C	1	0	XFO	Zinc finger protein (Fragment) OS=Xenopus laevis GN=XFO 1-1 PE=2 SV=1	233	0.5	0	0.5	0	0.5	1	0.25	0.75	3	1.58496	0.292893	0.533291
tr|Q5G8Z4|Q5G8Z4_XENLA	224	C	1	0	tcof1	Treacle OS=Xenopus laevis GN=tcof1 PE=2 SV=1	1476	0.5	0	0.5	0	0.5	1	0.25	0.75	3	1.58496	0.292893	0.533291
sp|Q4V7N4|TMA16_XENLA	254	C	1	0	tma16	Translation machinery-associated protein 16 OS=Xenopus laevis GN=tma16 PE=2 SV=1	196	0.5	0	0.5	0	0.5	1	0.25	0.75	3	1.58496	0.292893	0.533291
tr|B1N659|B1N659_XENLA	268	C	1	0	kcnq1	KvLQT-1 OS=Xenopus laevis GN=kcnq1 PE=2 SV=1	652	0.5	0	0.5	0	0.5	1	0.25	0.75	3	1.58496	0.292893	0.533291
tr|Q0VGW8|Q0VGW8_XENLA	271	C	0	1	hal.2	Histidine ammonia-lyase OS=Xenopus laevis GN=hal.2 PE=2 SV=1	664	0.5	0	0.5	0	0.5	1	0.25	0.75	3	1.58496	0.292893	0.533291
tr|Q6GMC2|Q6GMC2_XENLA	271		0	0	MGC81887	Histidine ammonia-lyase OS=Xenopus laevis GN=MGC81887 PE=2 SV=1	664	0.5	0	0.5	0	0.5	1	0.25	0.75	3	1.58496	0.292893	0.533291
tr|A1L2I6|A1L2I6_XENLA	276	C	1	0	LOC100036859	LOC100036859 protein OS=Xenopus laevis GN=LOC100036859 PE=2 SV=1	599	0.5	0	0.5	0	0.5	1	0.25	0.75	3	1.58496	0.292893	0.533291
tr|Q5FWN5|Q5FWN5_XENLA	16	C	10	0	msh6	MGC85188 protein OS=Xenopus laevis GN=msh6 PE=2 SV=1	1340	1	0	1	5	3	0	0.5	1.5	3	1.58496	0.62483	0.204238
sp|Q5XH16|NH2L1_XENLA	122	C	2	3	snu13	NHP2-like protein 1 OS=Xenopus laevis GN=snu13 PE=2 SV=1	128	0.5	1	0.5	0	2	2	0.75	2	2.66667	1.41504	0.125666	0.900782
tr|Q7ZX79|Q7ZX79_XENLA	73	C	0	16	nono	p54nrb protein OS=Xenopus laevis GN=nono PE=2 SV=1	464	3	0	1	4	5	3	1.5	4	2.66667	1.41504	0.316379	0.499792
tr|Q2V0J2|Q2V0J2_XENLA	73		0	0	p54nrb	54 kD nuclear RNA-binding protein OS=Xenopus laevis GN=p54nrb PE=2 SV=1	463	3	0	1	4	5	3	1.5	4	2.66667	1.41504	0.316379	0.499792
tr|A3KNE6|A3KNE6_XENLA	50	C	1	1	LOC100049116	LOC100049116 protein (Fragment) OS=Xenopus laevis GN=LOC100049116 PE=2 SV=1	58	0.5	1	1	1	3	1	0.75	2	2.66667	1.41504	0.421436	0.375268
tr|Q6IRP5|Q6IRP5_XENLA	227	C	1	0	krt19	MGC83069 protein OS=Xenopus laevis GN=krt19 PE=2 SV=1	412	1	1	2	2	2	3	1	2.5	2.5	1.32193	0.204833	0.688601
tr|Q800A4|Q800A4_XENLA	24	C	15	0	prim1	DNA primase OS=Xenopus laevis GN=prim1 PE=2 SV=1	420	2	1	2	3	4	3	1.5	3.5	2.33333	1.22239	0.105573	0.976448
sp|Q498E7|SMAL1_XENLA	113	C	45	4	smarcal1	SWI/SNF-related matrix-associated actin-dependent regulator of chromatin subfamily A-like protein 1 OS=Xenopus laevis GN=smarcal1 PE=2 SV=1	960	4	4	13	10	11	7	4	9	2.25	1.16993	0.242238	0.615758
sp|Q08D75|BRD4A_XENLA	56	C	4	21	brd4-a	Bromodomain-containing protein 4A OS=Xenopus laevis GN=brd4-a PE=2 SV=1	1351	3	3	3	3	7	6	3	6.5	2.16667	1.11548	0.0903345	1.04415
tr|Q4VT51|Q4VT51_XENLA	28	C	27	0	fanca	Fanconi anemia complementation group A OS=Xenopus laevis GN=fanca PE=2 SV=1	1422	3	3	5	4	6	6	3	6	2	1	#DIV/0!	#DIV/0!
sp|P49393|RS13_XENLA	183	C	0	9	rps13	40S ribosomal protein S13 OS=Xenopus laevis GN=rps13 PE=3 SV=2	151	1	1	0.5	3	2	2	1	2	2	1	#DIV/0!	#DIV/0!
tr|Q7SZT6|Q7SZT6_XENLA	183		0	0	rps13	Rps13-prov protein OS=Xenopus laevis GN=rps13 PE=2 SV=1	151	1	1	0.5	3	2	2	1	2	2	1	#DIV/0!	#DIV/0!
sp|P02537|K1C0_XENLA	227	C	0	10		Keratin-3, type I cytoskeletal 51 kDa OS=Xenopus laevis PE=2 SV=1	486	1	1	2	2	2	2	1	2	2	1	#DIV/0!	#DIV/0!
tr|A2BDA6|A2BDA6_XENLA	227		0	0	LOC100037084	LOC100037084 protein OS=Xenopus laevis GN=LOC100037084 PE=2 SV=1	423	1	1	2	2	2	2	1	2	2	1	#DIV/0!	#DIV/0!
tr|Q05AX6|Q05AX6_XENLA	227		0	0	krt19	Krt19 protein OS=Xenopus laevis GN=krt19 PE=2 SV=1	443	1	1	2	2	2	2	1	2	2	1	#DIV/0!	#DIV/0!
tr|Q505L4|Q505L4_XENLA	227		0	0	LOC397864	LOC397864 protein OS=Xenopus laevis GN=LOC397864 PE=2 SV=1	483	1	1	2	2	2	2	1	2	2	1	#DIV/0!	#DIV/0!
sp|P18248|PCNA_XENLA	9	C	0	23	pcna	Proliferating cell nuclear antigen OS=Xenopus laevis GN=pcna PE=2 SV=1	261	3	1	5	6	4	4	2	4	2	1	0.295167	0.529932
tr|Q6PF20|Q6PF20_XENLA	9		0	0	pcna	Proliferating cell nuclear antigen OS=Xenopus laevis GN=pcna PE=2 SV=1	261	3	1	5	6	4	4	2	4	2	1	0.295167	0.529932
tr|Q9I893|Q9I893_XENLA	9		0	0	PCNA	Proliferating cell nuclear antigen OS=Xenopus laevis GN=PCNA PE=2 SV=1	261	3	1	5	6	4	4	2	4	2	1	0.295167	0.529932
tr|Q7ZXU4|Q7ZXU4_XENLA	107		0	0	krt8	Krt8 protein OS=Xenopus laevis GN=krt8 PE=2 SV=1	507	0.5	1	0.5	0	2	1	0.75	1.5	2	1	0.349886	0.456074
sp|Q7ZYL5|KF22B_XENLA	181	C	4	1	kif22-b	Kinesin-like protein KIF22-B OS=Xenopus laevis GN=kif22-b PE=2 SV=2	650	0.5	1	0.5	1	2	1	0.75	1.5	2	1	0.349886	0.456074
sp|P52301|RAN_XENLA	165	C	6	0	ran	GTP-binding nuclear protein Ran OS=Xenopus laevis GN=ran PE=1 SV=2	216	0.5	1	1	1	1	2	0.75	1.5	2	1	0.349886	0.456074
tr|Q6GPC0|Q6GPC0_XENLA	167	C	25	1	top3a	DNA topoisomerase OS=Xenopus laevis GN=top3a PE=2 SV=1	1022	3	3	2	6	8	4	3	6	2	1	0.374334	0.426741
tr|Q4QQY4|Q4QQY4_XENLA	188	C	6	0	LOC733278	LOC733278 protein (Fragment) OS=Xenopus laevis GN=LOC733278 PE=2 SV=1	544	2	0	0.5	0	2	2	1	2	2	1	0.5	0.30103
sp|Q498G2|CE152_XENLA	231	C	0	6	cep152	Centrosomal protein of 152 kDa OS=Xenopus laevis GN=cep152 PE=2 SV=1	1663	2	0	0.5	0	2	2	1	2	2	1	0.5	0.30103
tr|Q66IN6|Q66IN6_XENLA	231		0	0	LOC446951	LOC446951 protein (Fragment) OS=Xenopus laevis GN=LOC446951 PE=2 SV=1	1042	1	0	0.5	0	1	1	0.5	1	2	1	0.5	0.30103
sp|Q4KLU2|PRP39_XENLA	275	C	5	0	prpf39	Pre-mRNA-processing factor 39 OS=Xenopus laevis GN=prpf39 PE=2 SV=1	641	1	0	1	1	1	1	0.5	1	2	1	0.5	0.30103
sp|P19600|HNRPC_XENLA	319	C	0	3	hnrnpc	Heterogeneous nuclear ribonucleoprotein C OS=Xenopus laevis GN=hnrnpc PE=2 SV=1	282	1	0	0.5	0	1	1	0.5	1	2	1	0.5	0.30103
tr|Q8AVP9|Q8AVP9_XENLA	319		0	0		Hnrpc-prov protein OS=Xenopus laevis PE=2 SV=1	263	1	0	0.5	0	1	1	0.5	1	2	1	0.5	0.30103
tr|A0A068ENH4|A0A068ENH4_XENLA	1	C	5	0	FAN1	FANCD2/FANCI-associated nuclease 1 (Fragment) OS=Xenopus laevis GN=FAN1 PE=2 SV=1	1017	0.5	0	2	2	1	0	0.25	0.5	2	1	0.711723	0.147689
tr|Q6GR42|Q6GR42_XENLA	48	C	1	0	gtf2h2	MGC81060 protein OS=Xenopus laevis GN=gtf2h2 PE=2 SV=1	395	0.5	0	0.5	0	1	0	0.25	0.5	2	1	0.711723	0.147689
tr|Q3C2L7|Q3C2L7_XENLA	75	C	1	0	phr	CPD photolyase-like OS=Xenopus laevis GN=phr PE=2 SV=1	557	0.5	0	0.5	0	1	0	0.25	0.5	2	1	0.711723	0.147689
sp|Q66KH9|CDK8_XENLA	87	C	0	1	cdk8	Cyclin-dependent kinase 8 OS=Xenopus laevis GN=cdk8 PE=2 SV=1	416	0.5	0	0.5	0	1	0	0.25	0.5	2	1	0.711723	0.147689
tr|Q7T0R3|Q7T0R3_XENLA	87		0	0	cdk19	Cdk-8-prov protein OS=Xenopus laevis GN=cdk19 PE=2 SV=1	486	0.5	0	0.5	0	1	0	0.25	0.5	2	1	0.711723	0.147689
tr|B1WBA5|B1WBA5_XENLA	98	C	0	2	LOC100036795	DNA (cytosine-5)-methyltransferase OS=Xenopus laevis GN=LOC100036795 PE=2 SV=1	1492	0.5	0	0.5	1	1	0	0.25	0.5	2	1	0.711723	0.147689
tr|P79922|P79922_XENLA	98		0	0	dnmt1	DNA (cytosine-5)-methyltransferase OS=Xenopus laevis GN=dnmt1 PE=2 SV=1	1490	0.5	0	0.5	1	1	0	0.25	0.5	2	1	0.711723	0.147689
tr|Q6GQH0|Q6GQH0_XENLA	98		0	0	dnmt1	DNA (cytosine-5)-methyltransferase OS=Xenopus laevis GN=dnmt1 PE=2 SV=1	1490	0.5	0	0.5	1	1	0	0.25	0.5	2	1	0.711723	0.147689
tr|Q9PUD2|Q9PUD2_XENLA	98		0	0		DNA methyltransferase 1 (Fragment) OS=Xenopus laevis PE=2 SV=1	373	0.5	0	0.5	1	1	0	0.25	0.5	2	1	0.711723	0.147689
sp|Q6NRT3|SMU1_XENLA	101	C	2	0	smu1	WD40 repeat-containing protein SMU1 OS=Xenopus laevis GN=smu1 PE=2 SV=1	513	0.5	0	0.5	1	1	0	0.25	0.5	2	1	0.711723	0.147689
tr|Q7SYX0|Q7SYX0_XENLA	102	C	2	0	serpina1	Serpina1d-prov protein OS=Xenopus laevis GN=serpina1 PE=2 SV=1	432	0.5	0	0.5	1	1	0	0.25	0.5	2	1	0.711723	0.147689
tr|Q0IH66|Q0IH66_XENLA	103	C	0	1	ddx10	Ddx10 protein OS=Xenopus laevis GN=ddx10 PE=2 SV=1	663	0.5	0	0.5	0	1	0	0.25	0.5	2	1	0.711723	0.147689
tr|Q4V7Z8|Q4V7Z8_XENLA	103		0	0	ddx10	Ddx10 protein (Fragment) OS=Xenopus laevis GN=ddx10 PE=2 SV=1	717	0.5	0	0.5	0	1	0	0.25	0.5	2	1	0.711723	0.147689
sp|O73787|GCP3_XENLA	116		0	0	tubgcp3	Gamma-tubulin complex component 3 homolog OS=Xenopus laevis GN=tubgcp3 PE=1 SV=1	906	0.5	0	0.5	0	1	0	0.25	0.5	2	1	0.711723	0.147689
tr|Q6PF23|Q6PF23_XENLA	116		0	0	tubgcp3	MGC69134 protein OS=Xenopus laevis GN=tubgcp3 PE=2 SV=1	906	0.5	0	0.5	0	1	0	0.25	0.5	2	1	0.711723	0.147689
tr|O57438|O57438_XENLA	118	C	0	1		Serine/threonine-protein phosphatase OS=Xenopus laevis PE=2 SV=2	518	0.5	0	0.5	0	1	0	0.25	0.5	2	1	0.711723	0.147689
tr|Q6AXB0|Q6AXB0_XENLA	118		0	0	ppp3ca	Serine/threonine-protein phosphatase OS=Xenopus laevis GN=ppp3ca PE=2 SV=1	511	0.5	0	0.5	0	1	0	0.25	0.5	2	1	0.711723	0.147689
tr|Q6IR94|Q6IR94_XENLA	118		0	0	ppp3cb	Serine/threonine-protein phosphatase OS=Xenopus laevis GN=ppp3cb PE=2 SV=1	507	0.5	0	0.5	0	1	0	0.25	0.5	2	1	0.711723	0.147689
tr|Q801N4|Q801N4_XENLA	118		0	0		Serine/threonine-protein phosphatase OS=Xenopus laevis PE=2 SV=1	518	0.5	0	0.5	0	1	0	0.25	0.5	2	1	0.711723	0.147689
tr|Q9DEF7|Q9DEF7_XENLA	118		0	0		Serine/threonine-protein phosphatase OS=Xenopus laevis PE=2 SV=1	508	0.5	0	0.5	0	1	0	0.25	0.5	2	1	0.711723	0.147689
tr|Q7ZYU2|Q7ZYU2_XENLA	120	C	0	1	hnrnpa0	LOC398455 protein (Fragment) OS=Xenopus laevis GN=hnrnpa0 PE=2 SV=1	308	0.5	0	0.5	0	1	0	0.25	0.5	2	1	0.711723	0.147689
tr|Q6DKN1|Q6DKN1_XENLA	120		0	0	LOC398455	LOC398455 protein OS=Xenopus laevis GN=LOC398455 PE=2 SV=1	303	0.5	0	0.5	0	1	0	0.25	0.5	2	1	0.711723	0.147689
tr|Q2VPI3|Q2VPI3_XENLA	126		0	0		Uncharacterized protein (Fragment) OS=Xenopus laevis PE=2 SV=1	301	0.5	0	1	1	1	0	0.25	0.5	2	1	0.711723	0.147689
tr|Q4QQX0|Q4QQX0_XENLA	126		0	0		Uncharacterized protein (Fragment) OS=Xenopus laevis PE=2 SV=1	277	0.5	0	1	1	1	0	0.25	0.5	2	1	0.711723	0.147689
tr|Q6AZV3|Q6AZV3_XENLA	143	C	0	2	rpl17	MGC78885 protein OS=Xenopus laevis GN=rpl17 PE=2 SV=1	184	0.5	0	0.5	1	1	0	0.25	0.5	2	1	0.711723	0.147689
tr|Q7ZY53|Q7ZY53_XENLA	143		0	0	rpl17	RPL17 protein (Fragment) OS=Xenopus laevis GN=rpl17 PE=2 SV=1	187	0.5	0	0.5	1	1	0	0.25	0.5	2	1	0.711723	0.147689
sp|Q7ZXH2|NSE2_XENLA	144	C	2	0	nsmce2	E3 SUMO-protein ligase NSE2 OS=Xenopus laevis GN=nsmce2 PE=2 SV=1	238	0.5	0	0.5	1	1	0	0.25	0.5	2	1	0.711723	0.147689
tr|Q6INS8|Q6INS8_XENLA	157	C	1	0	gmeb1	MGC81052 protein OS=Xenopus laevis GN=gmeb1 PE=2 SV=1	502	0.5	0	0.5	0	1	0	0.25	0.5	2	1	0.711723	0.147689
tr|Q6GN08|Q6GN08_XENLA	162	C	1	0	ncapd3	LOC398742 protein OS=Xenopus laevis GN=ncapd3 PE=2 SV=1	1492	0.5	0	0.5	0	1	0	0.25	0.5	2	1	0.711723	0.147689
tr|Q7ZXD0|Q7ZXD0_XENLA	164	C	0	2		MGC53266 protein OS=Xenopus laevis PE=2 SV=1	581	0.5	0	0.5	1	1	0	0.25	0.5	2	1	0.711723	0.147689
tr|Q566I4|Q566I4_XENLA	164		0	0	LOC446268	LOC446268 protein OS=Xenopus laevis GN=LOC446268 PE=2 SV=1	579	0.5	0	0.5	1	1	0	0.25	0.5	2	1	0.711723	0.147689
tr|Q6AX54|Q6AX54_XENLA	164		0	0	LOC446268	LOC446268 protein (Fragment) OS=Xenopus laevis GN=LOC446268 PE=2 SV=1	611	0.5	0	0.5	1	1	0	0.25	0.5	2	1	0.711723	0.147689
tr|Q6GN97|Q6GN97_XENLA	167		0	0	yrdc	LOC398509 protein OS=Xenopus laevis GN=yrdc PE=2 SV=1	236	0.5	0	0.5	0	1	0	0.25	0.5	2	1	0.711723	0.147689
tr|Q6GR13|Q6GR13_XENLA	167		0	0	gtf2i	MGC81388 protein OS=Xenopus laevis GN=gtf2i PE=2 SV=1	925	0.5	0	0.5	0	1	0	0.25	0.5	2	1	0.711723	0.147689
tr|Q7ZX49|Q7ZX49_XENLA	167		0	0	LOC398509	LOC398509 protein (Fragment) OS=Xenopus laevis GN=LOC398509 PE=2 SV=1	188	0.5	0	0.5	0	1	0	0.25	0.5	2	1	0.711723	0.147689
sp|Q9I869|KF22A_XENLA	181		0	0	kif22-a	Kinesin-like protein KIF22-A OS=Xenopus laevis GN=kif22-a PE=1 SV=1	651	0.5	0	0.5	0	1	0	0.25	0.5	2	1	0.711723	0.147689
tr|Q6GNJ3|Q6GNJ3_XENLA	192		0	0		Uncharacterized protein (Fragment) OS=Xenopus laevis PE=2 SV=1	299	0.5	0	1	0	1	0	0.25	0.5	2	1	0.711723	0.147689
tr|Q4FZN2|Q4FZN2_XENLA	193	C	0	4	rnaseh2a	Ribonuclease OS=Xenopus laevis GN=rnaseh2a PE=2 SV=1	302	0.5	0	2	1	1	0	0.25	0.5	2	1	0.711723	0.147689
tr|Q6GNJ4|Q6GNJ4_XENLA	193		0	0	LOC443655	Ribonuclease (Fragment) OS=Xenopus laevis GN=LOC443655 PE=2 SV=1	305	0.5	0	2	1	1	0	0.25	0.5	2	1	0.711723	0.147689
tr|Q7T0S3|Q7T0S3_XENLA	208	C	1	0	atp6ap2	Atp6ap2-prov protein OS=Xenopus laevis GN=atp6ap2 PE=1 SV=1	348	0.5	0	0.5	0	1	0	0.25	0.5	2	1	0.711723	0.147689
tr|Q6NTT2|Q6NTT2_XENLA	211	C	1	0	rps18	MGC82306 protein OS=Xenopus laevis GN=rps18 PE=2 SV=1	152	0.5	0	0.5	0	1	0	0.25	0.5	2	1	0.711723	0.147689
sp|P55862|MCM5A_XENLA	212	C	0	1	mcm5-a	DNA replication licensing factor mcm5-A OS=Xenopus laevis GN=mcm5-a PE=1 SV=2	735	0.5	0	0.5	0	1	0	0.25	0.5	2	1	0.711723	0.147689
sp|Q6PCI7|MCM5B_XENLA	212		0	0	mcm5-b	DNA replication licensing factor mcm5-B OS=Xenopus laevis GN=mcm5-b PE=2 SV=1	735	0.5	0	0.5	0	1	0	0.25	0.5	2	1	0.711723	0.147689
tr|Q5HZR6|Q5HZR6_XENLA	214	C	1	0	LOC496324	LOC496324 protein OS=Xenopus laevis GN=LOC496324 PE=2 SV=1	292	0.5	0	0.5	0	1	0	0.25	0.5	2	1	0.711723	0.147689
sp|P45593|COF1B_XENLA	238	C	0	1	cfl1-b	Cofilin-1-B OS=Xenopus laevis GN=cfl1-b PE=1 SV=3	168	0.5	0	0.5	0	1	0	0.25	0.5	2	1	0.711723	0.147689
sp|P45695|COF1A_XENLA	238		0	0	cfl1-a	Cofilin-1-A OS=Xenopus laevis GN=cfl1-a PE=1 SV=3	168	0.5	0	0.5	0	1	0	0.25	0.5	2	1	0.711723	0.147689
tr|Q8AY27|Q8AY27_XENLA	259	C	0	2	rad1	Checkpoint protein OS=Xenopus laevis GN=rad1 PE=2 SV=1	281	0.5	0	1	0	1	0	0.25	0.5	2	1	0.711723	0.147689
tr|A5PKS1|A5PKS1_XENLA	259		0	0	Rad1	Checkpoint protein OS=Xenopus laevis GN=Rad1 PE=2 SV=1	281	0.5	0	1	0	1	0	0.25	0.5	2	1	0.711723	0.147689
tr|Q6ING8|Q6ING8_XENLA	283	C	2	0	ung	Uracil-DNA glycosylase OS=Xenopus laevis GN=ung PE=2 SV=1	304	0.5	0	0.5	1	1	0	0.25	0.5	2	1	0.711723	0.147689
sp|Q569Z1|EIF3B_XENLA	287	C	1	0	eif3b	Eukaryotic translation initiation factor 3 subunit B OS=Xenopus laevis GN=eif3b PE=2 SV=1	688	0.5	0	0.5	0	1	0	0.25	0.5	2	1	0.711723	0.147689
tr|Q5M957|Q5M957_XENLA	305	C	1	0	dera	LOC496174 protein OS=Xenopus laevis GN=dera PE=2 SV=1	318	0.5	0	0.5	0	1	0	0.25	0.5	2	1	0.711723	0.147689
sp|Q8AVC1|AN32B_XENLA	307	C	0	1	anp32b	Acidic leucine-rich nuclear phosphoprotein 32 family member B OS=Xenopus laevis GN=anp32b PE=2 SV=1	239	0.5	0	0.5	0	1	0	0.25	0.5	2	1	0.711723	0.147689
tr|Q2TAF9|Q2TAF9_XENLA	307		0	0	anp32c	MGC132157 protein OS=Xenopus laevis GN=anp32c PE=2 SV=1	245	0.5	0	0.5	0	1	0	0.25	0.5	2	1	0.711723	0.147689
sp|Q6GLY5|ASUN_XENLA	308	C	1	0	asun	Protein asunder homolog OS=Xenopus laevis GN=asun PE=2 SV=1	715	0.5	0	0.5	0	1	0	0.25	0.5	2	1	0.711723	0.147689
sp|Q9DDY9|PAB2A_XENLA	309	C	0	1	pabpn1-a	Polyadenylate-binding protein 2-A OS=Xenopus laevis GN=pabpn1-a PE=2 SV=1	296	0.5	0	0.5	0	1	0	0.25	0.5	2	1	0.711723	0.147689
sp|Q7ZXB8|PAB2B_XENLA	309		0	0	pabpn1-b	Polyadenylate-binding protein 2-B OS=Xenopus laevis GN=pabpn1-b PE=2 SV=1	295	0.5	0	0.5	0	1	0	0.25	0.5	2	1	0.711723	0.147689
tr|Q801P9|Q801P9_XENLA	338	C	0	1		MGC53795 protein OS=Xenopus laevis PE=2 SV=1	607	0.5	0	0.5	0	1	0	0.25	0.5	2	1	0.711723	0.147689
tr|Q63ZR1|Q63ZR1_XENLA	338		0	0	DDX5	DDX5 protein OS=Xenopus laevis GN=DDX5 PE=2 SV=1	608	0.5	0	0.5	0	1	0	0.25	0.5	2	1	0.711723	0.147689
tr|Q9I8S3|Q9I8S3_XENLA	338		0	0	ddx5	P68 RNA helicase OS=Xenopus laevis GN=ddx5 PE=2 SV=1	608	0.5	0	0.5	0	1	0	0.25	0.5	2	1	0.711723	0.147689
tr|Q6DCY8|Q6DCY8_XENLA	169	C	0	15	wdr5	Wdr5-prov protein OS=Xenopus laevis GN=wdr5 PE=2 SV=1	334	2	2	2	2	4	3	2	3.5	1.75	0.807355	0.204833	0.688601
tr|Q66J98|Q66J98_XENLA	169		0	0	wdr5	Wdr5-b-prov protein OS=Xenopus laevis GN=wdr5 PE=2 SV=1	334	2	2	2	2	4	3	2	3.5	1.75	0.807355	0.204833	0.688601
tr|Q4V861|Q4V861_XENLA	56		0	0	LOC443648	LOC443648 protein (Fragment) OS=Xenopus laevis GN=LOC443648 PE=2 SV=1	572	2	2	2	2	3	4	2	3.5	1.75	0.807355	0.204833	0.688601
tr|Q6GNR0|Q6GNR0_XENLA	56		0	0	LOC443648	LOC443648 protein (Fragment) OS=Xenopus laevis GN=LOC443648 PE=2 SV=1	559	2	2	2	2	3	4	2	3.5	1.75	0.807355	0.204833	0.688601
tr|Q6NTX9|Q6NTX9_XENLA	145	C	17	0	sub1	MGC81442 protein OS=Xenopus laevis GN=sub1 PE=2 SV=1	128	3	1	3	3	3	4	2	3.5	1.75	0.807355	0.349886	0.456074
tr|Q5FWP3|Q5FWP3_XENLA	0		0	0	LOC733160	LOC733160 protein (Fragment) OS=Xenopus laevis GN=LOC733160 PE=2 SV=1	474	3	4	4	5	7	5	3.5	6	1.71429	0.777608	0.198727	0.701742
tr|Q4JNX8|Q4JNX8_XENLA	5	C	0	11	RTS	RECQL4-helicase-like protein OS=Xenopus laevis GN=RTS PE=2 SV=1	1500	1	2	0.5	3	3	2	1.5	2.5	1.66667	0.736966	0.292893	0.533291
tr|B1WBC8|B1WBC8_XENLA	5		0	0	rts	Rts protein OS=Xenopus laevis GN=rts PE=1 SV=1	1504	1	2	0.5	3	3	2	1.5	2.5	1.66667	0.736966	0.292893	0.533291
tr|Q33DM4|Q33DM4_XENLA	5		0	0	recql4	RecQ4 protein OS=Xenopus laevis GN=recql4 PE=2 SV=1	1503	1	2	0.5	3	3	2	1.5	2.5	1.66667	0.736966	0.292893	0.533291
tr|A1L3F9|A1L3F9_XENLA	38	C	0	14	LOC100036995	LOC100036995 protein (Fragment) OS=Xenopus laevis GN=LOC100036995 PE=2 SV=1	583	2	1	2	4	3	2	1.5	2.5	1.66667	0.736966	0.292893	0.533291
tr|B1H1N6|B1H1N6_XENLA	38		0	0	LOC100036995	LOC100036995 protein (Fragment) OS=Xenopus laevis GN=LOC100036995 PE=2 SV=1	587	2	1	2	4	3	2	1.5	2.5	1.66667	0.736966	0.292893	0.533291
tr|Q4V867|Q4V867_XENLA	131	C	11	0	orc5	MGC114641 protein OS=Xenopus laevis GN=orc5 PE=2 SV=1	448	2	1	1	2	2	3	1.5	2.5	1.66667	0.736966	0.292893	0.533291
tr|Q71QG2|Q71QG2_XENLA	233	C	1	0		PIAS OS=Xenopus laevis PE=2 SV=1	499	2	1	1	1	2	3	1.5	2.5	1.66667	0.736966	0.292893	0.533291
tr|Q6DFM0|Q6DFM0_XENLA	68	C	5	31	smarca5	ISWI protein OS=Xenopus laevis GN=smarca5 PE=1 SV=1	1046	4	5	5	7	11	4	4.5	7.5	1.66667	0.736966	0.547512	0.261607
tr|Q8UVU1|Q8UVU1_XENLA	36		0	0		DNA ligase OS=Xenopus laevis PE=2 SV=1	906	0.5	2	2	3	2	2	1.25	2	1.6	0.678072	0.5	0.30103
tr|Q4VT49|Q4VT49_XENLA	324	C	11	0	fancl	Fanconi anemia complementation group L OS=Xenopus laevis GN=fancl PE=2 SV=1	372	0.5	2	3	2	2	2	1.25	2	1.6	0.678072	0.5	0.30103
tr|Q4QQP4|Q4QQP4_XENLA	6	C	28	0	rfc3	MGC115007 protein OS=Xenopus laevis GN=rfc3 PE=2 SV=1	356	4	3	4	6	7	4	3.5	5.5	1.57143	0.652077	0.39587	0.402447
tr|Q642R8|Q642R8_XENLA	109	C	0	35	pold1	DNA polymerase OS=Xenopus laevis GN=pold1 PE=2 SV=1	1109	4	3	8	9	7	4	3.5	5.5	1.57143	0.652077	0.39587	0.402447
tr|D0VEW7|D0VEW7_XENLA	109		0	0	POL3	DNA polymerase OS=Xenopus laevis GN=POL3 PE=2 SV=1	1108	4	3	8	9	7	4	3.5	5.5	1.57143	0.652077	0.39587	0.402447
sp|P06900|H2B12_XENLA	32	C	1	0		Histone H2B 1.2 OS=Xenopus laevis PE=1 SV=2	126	5	5	6	7	7	8	5	7.5	1.5	0.584963	0.125666	0.900782
tr|C4N9Q9|C4N9Q9_XENLA	85	C	13	38	rad50	Rad50 OS=Xenopus laevis GN=rad50 PE=2 SV=1	1312	7	5	10	11	10	8	6	9	1.5	0.584963	0.16795	0.774821
tr|D5MDW0|D5MDW0_XENLA	97	C	33	0	fancm	Fanconi anemia protein OS=Xenopus laevis GN=fancm PE=2 SV=1	2166	5	3	6	7	7	5	4	6	1.5	0.584963	0.292893	0.533291
sp|Q6IP18|RFA2A_XENLA	13	C	20	0	rpa2-a	Replication protein A 32 kDa subunit-A OS=Xenopus laevis GN=rpa2-a PE=1 SV=1	276	4	4	9	8	7	5	4	6	1.5	0.584963	0.295167	0.529932
tr|Q9DF71|Q9DF71_XENLA	68		0	0	ISWI	Imitation switch ISWI OS=Xenopus laevis GN=ISWI PE=2 SV=1	1046	3	5	5	6	8	4	4	6	1.5	0.584963	0.493133	0.307036
tr|Q5HZL6|Q5HZL6_XENLA	54	C	29	0	LOC496363	LOC496363 protein (Fragment) OS=Xenopus laevis GN=LOC496363 PE=2 SV=1	517	3	3	8	6	6	3	3	4.5	1.5	0.584963	0.5	0.30103
sp|B6CHA3|UHRF1_XENLA	190	C	0	24	uhrf1	E3 ubiquitin-protein ligase UHRF1 OS=Xenopus laevis GN=uhrf1 PE=2 SV=1	772	3	3	5	4	6	3	3	4.5	1.5	0.584963	0.5	0.30103
tr|Q2TAH0|Q2TAH0_XENLA	190		0	0	LOC432234	LOC432234 protein (Fragment) OS=Xenopus laevis GN=LOC432234 PE=2 SV=1	656	3	3	5	4	6	3	3	4.5	1.5	0.584963	0.5	0.30103
tr|Q52L17|Q52L17_XENLA	190		0	0	LOC432234	LOC432234 protein (Fragment) OS=Xenopus laevis GN=LOC432234 PE=2 SV=1	598	3	3	5	4	6	3	3	4.5	1.5	0.584963	0.5	0.30103
tr|Q6IP39|Q6IP39_XENLA	190		0	0	LOC432234	LOC432234 protein (Fragment) OS=Xenopus laevis GN=LOC432234 PE=2 SV=1	597	3	3	5	4	6	3	3	4.5	1.5	0.584963	0.5	0.30103
tr|Q6EKW2|Q6EKW2_XENLA	66	C	0	4	RAD26	Rad26 OS=Xenopus laevis GN=RAD26 PE=2 SV=1	798	1	1	2	6	2	1	1	1.5	1.5	0.584963	0.5	0.30103
tr|Q4V7U7|Q4V7U7_XENLA	66		0	0	RAD26	RAD26 protein OS=Xenopus laevis GN=RAD26 PE=2 SV=1	738	1	1	2	6	2	1	1	1.5	1.5	0.584963	0.5	0.30103
tr|A2BDA9|A2BDA9_XENLA	107		0	0	LOC100037087	LOC100037087 protein OS=Xenopus laevis GN=LOC100037087 PE=2 SV=1	490	1	1	0.5	0	1	2	1	1.5	1.5	0.584963	0.5	0.30103
sp|P70032|PLK1_XENLA	168	C	9	0	plk1	Serine/threonine-protein kinase PLK1 OS=Xenopus laevis GN=plk1 PE=1 SV=1	598	1	1	2	2	1	2	1	1.5	1.5	0.584963	0.5	0.30103
sp|Q6NUF4|TPX2A_XENLA	41	C	6	1	tpx2-a	Targeting protein for Xklp2-A OS=Xenopus laevis GN=tpx2-a PE=1 SV=1	716	2	0	1	1	2	1	1	1.5	1.5	0.584963	0.711723	0.147689
tr|Q5PPZ3|Q5PPZ3_XENLA	30	C	3	0	LOC496036	LOC496036 protein OS=Xenopus laevis GN=LOC496036 PE=2 SV=1	217	1	0	0.5	1	0.5	1	0.5	0.75	1.5	0.584963	0.711723	0.147689
sp|Q91819|AURAB_XENLA	80		0	0	aurka-b	Aurora kinase A-B OS=Xenopus laevis GN=aurka-b PE=2 SV=3	408	1	0	0.5	0	0.5	1	0.5	0.75	1.5	0.584963	0.711723	0.147689
sp|Q91820|AURAA_XENLA	80		0	0	aurka-a	Aurora kinase A-A OS=Xenopus laevis GN=aurka-a PE=1 SV=1	407	1	0	0.5	0	0.5	1	0.5	0.75	1.5	0.584963	0.711723	0.147689
tr|A0A060CPC3|A0A060CPC3_XENLA	80		0	0	aurka-b	Aurora kinase A-B (Fragment) OS=Xenopus laevis GN=aurka-b PE=2 SV=1	330	1	0	0.5	0	0.5	1	0.5	0.75	1.5	0.584963	0.711723	0.147689
tr|A0A060CUW4|A0A060CUW4_XENLA	80		0	0	aurka-b	Aurora kinase A-B (Fragment) OS=Xenopus laevis GN=aurka-b PE=2 SV=1	258	1	0	0.5	0	0.5	1	0.5	0.75	1.5	0.584963	0.711723	0.147689
sp|Q4V862|CDK9A_XENLA	248	C	2	0	cdk9-a	Cyclin-dependent kinase 9-A OS=Xenopus laevis GN=cdk9-a PE=2 SV=1	376	1	0	0.5	0	0.5	1	0.5	0.75	1.5	0.584963	0.711723	0.147689
tr|O73820|O73820_XENLA	4		0	0		Mi-2 (Fragment) OS=Xenopus laevis PE=2 SV=1	410	1	1	1	0	3	0	1	1.5	1.5	0.584963	0.795167	0.0995415
tr|Q6DDP9|Q6DDP9_XENLA	179	C	1	0	wdhd1	Wdhd1 protein (Fragment) OS=Xenopus laevis GN=wdhd1 PE=2 SV=1	871	1	1	4	5	3	0	1	1.5	1.5	0.584963	0.795167	0.0995415
tr|Q4V843|Q4V843_XENLA	85		0	0	LOC495064	LOC495064 protein (Fragment) OS=Xenopus laevis GN=LOC495064 PE=2 SV=1	555	6	3	7	7	7	6	4.5	6.5	1.44444	0.530515	0.39587	0.402447
tr|Q5XH50|Q5XH50_XENLA	85		0	0	LOC495064	LOC495064 protein (Fragment) OS=Xenopus laevis GN=LOC495064 PE=2 SV=1	724	6	3	7	7	7	6	4.5	6.5	1.44444	0.530515	0.39587	0.402447
tr|Q8UVU2|Q8UVU2_XENLA	36	C	0	15	lig3	DNA ligase OS=Xenopus laevis GN=lig3 PE=2 SV=1	988	0.5	3	3	4	3	2	1.75	2.5	1.42857	0.514573	0.657481	0.182117
tr|Q6IRA7|Q6IRA7_XENLA	36		0	0	LOC398275	DNA ligase OS=Xenopus laevis GN=LOC398275 PE=2 SV=1	933	0.5	3	3	4	3	2	1.75	2.5	1.42857	0.514573	0.657481	0.182117
tr|B7ZRD4|B7ZRD4_XENLA	227		0	0	ak-c-A	Ak-c-A protein OS=Xenopus laevis GN=ak-c-A PE=2 SV=1	492	2	3	3	4	4	3	2.5	3.5	1.4	0.485427	0.292893	0.533291
tr|Q642P1|Q642P1_XENLA	227		0	0	LOC446967	LOC446967 protein (Fragment) OS=Xenopus laevis GN=LOC446967 PE=2 SV=1	467	2	3	3	4	4	3	2.5	3.5	1.4	0.485427	0.292893	0.533291
tr|Q8AV12|Q8AV12_XENLA	227		0	0	xak-c	Adult keratin XAK-C OS=Xenopus laevis GN=xak-c PE=2 SV=1	491	2	3	3	4	4	3	2.5	3.5	1.4	0.485427	0.292893	0.533291
sp|Q9DE14|ATR_XENLA	11	C	88	23	atr	Serine/threonine-protein kinase atr OS=Xenopus laevis GN=atr PE=1 SV=2	2654	14	11	25	26	21	14	12.5	17.5	1.4	0.485427	0.368415	0.433663
sp|P02281|H2B11_XENLA	32	C	0	42		Histone H2B 1.1 OS=Xenopus laevis PE=1 SV=2	126	6	6	6	8	8	8	6	8	1.33333	0.415037	#DIV/0!	#DIV/0!
tr|Q92130|Q92130_XENLA	32		0	0	H2B	Histone H2B OS=Xenopus laevis GN=H2B PE=3 SV=1	126	6	6	6	8	8	8	6	8	1.33333	0.415037	#DIV/0!	#DIV/0!
tr|A1A645|A1A645_XENLA	111		0	0		Uncharacterized protein (Fragment) OS=Xenopus laevis PE=2 SV=1	371	3	3	2	4	4	4	3	4	1.33333	0.415037	#DIV/0!	#DIV/0!
tr|A9ULV9|A9ULV9_XENLA	111		0	0		Uncharacterized protein (Fragment) OS=Xenopus laevis PE=2 SV=1	371	3	3	2	4	4	4	3	4	1.33333	0.415037	#DIV/0!	#DIV/0!
tr|Q3KPL2|Q3KPL2_XENLA	111		0	0		Uncharacterized protein (Fragment) OS=Xenopus laevis PE=2 SV=1	370	3	3	2	4	4	4	3	4	1.33333	0.415037	#DIV/0!	#DIV/0!
tr|Q6GQE3|Q6GQE3_XENLA	111		0	0		Uncharacterized protein (Fragment) OS=Xenopus laevis PE=2 SV=1	371	3	3	2	4	4	4	3	4	1.33333	0.415037	#DIV/0!	#DIV/0!
tr|Q8AVC8|Q8AVC8_XENLA	111		0	0	LOC397919	LOC397919 protein (Fragment) OS=Xenopus laevis GN=LOC397919 PE=2 SV=1	370	3	3	2	4	4	4	3	4	1.33333	0.415037	#DIV/0!	#DIV/0!
tr|B7ZRE7|B7ZRE7_XENLA	72	C	0	22	BRCA1	Breast and ovarian cancer susceptibility protein OS=Xenopus laevis GN=BRCA1 PE=2 SV=1	1579	3	3	3	5	5	3	3	4	1.33333	0.415037	0.5	0.30103
tr|Q90X96|Q90X96_XENLA	72		0	0	brca1	Breast and ovarian cancer susceptibility protein OS=Xenopus laevis GN=brca1 PE=1 SV=1	1579	3	3	3	5	5	3	3	4	1.33333	0.415037	0.5	0.30103
sp|Q9DE46|DPOLA_XENLA	126	C	0	27	pola1	DNA polymerase alpha catalytic subunit OS=Xenopus laevis GN=pola1 PE=1 SV=1	1458	3	3	7	6	5	3	3	4	1.33333	0.415037	0.5	0.30103
tr|B1WBE2|B1WBE2_XENLA	126		0	0	LOC398200	DNA polymerase OS=Xenopus laevis GN=LOC398200 PE=2 SV=1	1458	3	3	7	6	5	3	3	4	1.33333	0.415037	0.5	0.30103
tr|B7ZRF3|B7ZRF3_XENLA	126		0	0	LOC398200	DNA polymerase OS=Xenopus laevis GN=LOC398200 PE=2 SV=1	1458	3	3	7	6	5	3	3	4	1.33333	0.415037	0.5	0.30103
tr|Q7SYZ0|Q7SYZ0_XENLA	222	C	20	0	vrk1	Vrk1-prov protein OS=Xenopus laevis GN=vrk1 PE=2 SV=1	144	3	3	3	3	5	3	3	4	1.33333	0.415037	0.5	0.30103
tr|Q6GP55|Q6GP55_XENLA	68		0	0	smarca1	MGC80667 protein OS=Xenopus laevis GN=smarca1 PE=2 SV=1	403	0.5	1	0.5	1	1	1	0.75	1	1.33333	0.415037	0.5	0.30103
sp|P07222|NPM_XENLA	71	C	0	3	npm1	Nucleophosmin OS=Xenopus laevis GN=npm1 PE=1 SV=1	299	0.5	1	0.5	0	1	1	0.75	1	1.33333	0.415037	0.5	0.30103
tr|Q7SZ17|Q7SZ17_XENLA	71		0	0	MGC64305	MGC64305 protein OS=Xenopus laevis GN=MGC64305 PE=2 SV=1	299	0.5	1	0.5	0	1	1	0.75	1	1.33333	0.415037	0.5	0.30103
tr|Q7ZTP6|Q7ZTP6_XENLA	71		0	0	npm1	Npm1 protein OS=Xenopus laevis GN=npm1 PE=2 SV=1	300	0.5	1	0.5	0	1	1	0.75	1	1.33333	0.415037	0.5	0.30103
tr|Q91802|Q91802_XENLA	71		0	0		NO38 OS=Xenopus laevis PE=2 SV=1	296	0.5	1	0.5	0	1	1	0.75	1	1.33333	0.415037	0.5	0.30103
tr|Q0IH52|Q0IH52_XENLA	78		0	0	LOC432089	LOC432089 protein (Fragment) OS=Xenopus laevis GN=LOC432089 PE=2 SV=1	565	0.5	1	1	1	1	1	0.75	1	1.33333	0.415037	0.5	0.30103
tr|Q6IR72|Q6IR72_XENLA	78		0	0	LOC432089	LOC432089 protein (Fragment) OS=Xenopus laevis GN=LOC432089 PE=2 SV=1	566	0.5	1	1	1	1	1	0.75	1	1.33333	0.415037	0.5	0.30103
tr|Q7ZTJ3|Q7ZTJ3_XENLA	113		0	0		MGC53832 protein OS=Xenopus laevis PE=2 SV=1	698	0.5	1	1	0	1	1	0.75	1	1.33333	0.415037	0.5	0.30103
tr|Q7ZTQ2|Q7ZTQ2_XENLA	113		0	0	acsl1	Facl2 protein OS=Xenopus laevis GN=acsl1 PE=2 SV=1	698	0.5	1	1	0	1	1	0.75	1	1.33333	0.415037	0.5	0.30103
tr|Q566G1|Q566G1_XENLA	116		0	0	MGC115350	Poly [ADP-ribose] polymerase OS=Xenopus laevis GN=MGC115350 PE=2 SV=1	493	0.5	1	2	1	1	1	0.75	1	1.33333	0.415037	0.5	0.30103
sp|Q5EAW4|MCM10_XENLA	121	C	7	0	mcm10	Protein MCM10 homolog OS=Xenopus laevis GN=mcm10 PE=1 SV=2	860	0.5	1	2	2	1	1	0.75	1	1.33333	0.415037	0.5	0.30103
tr|Q7ZWY8|Q7ZWY8_XENLA	122		0	0	nhp2l1	Hoip-prov protein OS=Xenopus laevis GN=nhp2l1 PE=2 SV=1	128	0.5	1	0.5	0	1	1	0.75	1	1.33333	0.415037	0.5	0.30103
tr|Q4QQZ3|Q4QQZ3_XENLA	184	C	3	0	ppih	Peptidyl-prolyl cis-trans isomerase OS=Xenopus laevis GN=ppih PE=2 SV=1	177	0.5	1	0.5	0	1	1	0.75	1	1.33333	0.415037	0.5	0.30103
tr|Q4QR44|Q4QR44_XENLA	191	C	5	0	rps15a	MGC114789 protein OS=Xenopus laevis GN=rps15a PE=2 SV=1	130	0.5	1	1	1	1	1	0.75	1	1.33333	0.415037	0.5	0.30103
sp|O93235|CIRBA_XENLA	215	C	5	0	cirbp-a	Cold-inducible RNA-binding protein A OS=Xenopus laevis GN=cirbp-a PE=1 SV=2	166	0.5	1	1	1	1	1	0.75	1	1.33333	0.415037	0.5	0.30103
tr|Q698P6|Q698P6_XENLA	237	C	4	0	fancf	Fanconi anemia protein OS=Xenopus laevis GN=fancf PE=2 SV=1	339	0.5	1	0.5	1	1	1	0.75	1	1.33333	0.415037	0.5	0.30103
tr|Q6NRJ4|Q6NRJ4_XENLA	266	C	3	0	mcph1	MGC83773 protein OS=Xenopus laevis GN=mcph1 PE=2 SV=1	305	0.5	1	0.5	0	1	1	0.75	1	1.33333	0.415037	0.5	0.30103
tr|A0JMR8|A0JMR8_XENLA	312	C	4	0	dhx33	Dhx33 protein OS=Xenopus laevis GN=dhx33 PE=2 SV=1	266	0.5	1	1	0	1	1	0.75	1	1.33333	0.415037	0.5	0.30103
tr|Q6NRJ3|Q6NRJ3_XENLA	320	C	4	0	exosc10	MGC83774 protein OS=Xenopus laevis GN=exosc10 PE=2 SV=1	883	0.5	1	1	0	1	1	0.75	1	1.33333	0.415037	0.5	0.30103
sp|O57686|SMO1A_XENLA	322	C	0	4	sumo1-a	Small ubiquitin-related modifier 1-A OS=Xenopus laevis GN=sumo1-a PE=1 SV=1	102	0.5	1	0.5	1	1	1	0.75	1	1.33333	0.415037	0.5	0.30103
sp|Q5EAX4|SMO1B_XENLA	322		0	0	sumo1-b	Small ubiquitin-related modifier 1-B OS=Xenopus laevis GN=sumo1-b PE=3 SV=1	102	0.5	1	0.5	1	1	1	0.75	1	1.33333	0.415037	0.5	0.30103
tr|B7ZQM3|B7ZQM3_XENLA	322		0	0	MGC85025	Small ubiquitin-related modifier OS=Xenopus laevis GN=MGC85025 PE=2 SV=1	102	0.5	1	0.5	1	1	1	0.75	1	1.33333	0.415037	0.5	0.30103
tr|Q66KY6|Q66KY6_XENLA	326	C	5	0	rpl11	MGC85310 protein OS=Xenopus laevis GN=rpl11 PE=2 SV=1	177	0.5	1	1	1	1	1	0.75	1	1.33333	0.415037	0.5	0.30103
sp|O93610|DPOD2_XENLA	130	C	14	0	pold2	DNA polymerase delta subunit 2 OS=Xenopus laevis GN=pold2 PE=2 SV=1	463	3	0	3	4	2	2	1.5	2	1.33333	0.415037	0.795167	0.0995415
tr|Q70YG6|Q70YG6_XENLA	155	C	0	10	cyp	Peptidyl-prolyl cis-trans isomerase (Fragment) OS=Xenopus laevis GN=cyp PE=2 SV=1	157	3	0	2	1	2	2	1.5	2	1.33333	0.415037	0.795167	0.0995415
tr|Q8AVP8|Q8AVP8_XENLA	155		0	0		Peptidyl-prolyl cis-trans isomerase OS=Xenopus laevis PE=2 SV=1	164	3	0	2	1	2	2	1.5	2	1.33333	0.415037	0.795167	0.0995415
sp|Q01588|RFA1_XENLA	8	C	1	127	rpa1	Replication protein A 70 kDa DNA-binding subunit OS=Xenopus laevis GN=rpa1 PE=1 SV=1	609	19	15	23	26	23	22	17	22.5	1.32353	0.40439	0.205449	0.687296
tr|Q6NRZ5|Q6NRZ5_XENLA	8		0	0	LOC397937	LOC397937 protein OS=Xenopus laevis GN=LOC397937 PE=2 SV=1	607	19	15	23	25	23	22	17	22.5	1.32353	0.40439	0.205449	0.687296
sp|Q9W603|SP16H_XENLA	0	C	0	127	supt16h	FACT complex subunit SPT16 OS=Xenopus laevis GN=supt16h PE=1 SV=2	1035	15	20	21	25	28	18	17.5	23	1.31429	0.394279	0.459109	0.338084
tr|B7ZQW8|B7ZQW8_XENLA	0		0	0	SUPT16H	SUPT16H protein OS=Xenopus laevis GN=SUPT16H PE=2 SV=1	1035	15	20	21	25	28	18	17.5	23	1.31429	0.394279	0.459109	0.338084
sp|Q9DE27|RUVB2_XENLA	58	C	0	23	ruvbl2	RuvB-like 2 OS=Xenopus laevis GN=ruvbl2 PE=2 SV=1	462	5	2	2	5	7	2	3.5	4.5	1.28571	0.36257	0.770513	0.11322
tr|Q0IH85|Q0IH85_XENLA	58	C	2	0	ruvbl2	LOC398205 protein OS=Xenopus laevis GN=ruvbl2 PE=2 SV=1	462	5	2	2	5	7	2	3.5	4.5	1.28571	0.36257	0.770513	0.11322
tr|Q801R1|Q801R1_XENLA	58		0	0		Ruvbl2-prov protein OS=Xenopus laevis PE=2 SV=1	462	5	2	2	5	7	2	3.5	4.5	1.28571	0.36257	0.770513	0.11322
tr|Q6PH89|Q6PH89_XENLA	18	C	0	2	hist1h2am	Histone H2A OS=Xenopus laevis GN=hist1h2am PE=2 SV=1	139	2	2	2	3	3	2	2	2.5	1.25	0.321928	0.5	0.30103
sp|Q6GM86|H2AX_XENLA	18		0	0	h2afx	Histone H2AX OS=Xenopus laevis GN=h2afx PE=1 SV=3	139	2	2	3	2	3	2	2	2.5	1.25	0.321928	0.5	0.30103
tr|Q6AZJ8|Q6AZJ8_XENLA	18		0	0	hist1h2aj	Histone H2A OS=Xenopus laevis GN=hist1h2aj PE=1 SV=1	130	2	2	3	2	3	2	2	2.5	1.25	0.321928	0.5	0.30103
tr|Q6DKE3|Q6DKE3_XENLA	18		0	0	hist1h2aa	Histone H2A OS=Xenopus laevis GN=hist1h2aa PE=2 SV=1	139	2	2	2	3	3	2	2	2.5	1.25	0.321928	0.5	0.30103
tr|Q6INC9|Q6INC9_XENLA	18		0	0	h2afj	Histone H2A OS=Xenopus laevis GN=h2afj PE=2 SV=1	126	2	2	1	2	3	2	2	2.5	1.25	0.321928	0.5	0.30103
tr|Q8AVX7|Q8AVX7_XENLA	90	C	0	13	smarce1	Smarce1 protein OS=Xenopus laevis GN=smarce1 PE=2 SV=1	402	2	2	2	2	3	2	2	2.5	1.25	0.321928	0.5	0.30103
tr|Q5XH26|Q5XH26_XENLA	90		0	0	smarce1	Smarce1 protein OS=Xenopus laevis GN=smarce1 PE=2 SV=1	423	2	2	2	2	3	2	2	2.5	1.25	0.321928	0.5	0.30103
tr|Q8QG95|Q8QG95_XENLA	90		0	0		Baf57 OS=Xenopus laevis PE=2 SV=1	423	2	2	2	2	3	2	2	2.5	1.25	0.321928	0.5	0.30103
tr|Q6GQ59|Q6GQ59_XENLA	115	C	7	7	MGC80325	MGC80325 protein OS=Xenopus laevis GN=MGC80325 PE=2 SV=1	335	2	2	1	4	3	2	2	2.5	1.25	0.321928	0.5	0.30103
tr|Q92132|Q92132_XENLA	123		0	0	H3r	Histone H3 OS=Xenopus laevis GN=H3r PE=3 SV=1	136	2	2	2	4	3	2	2	2.5	1.25	0.321928	0.5	0.30103
tr|Q98UJ3|Q98UJ3_XENLA	107	C	0	4	krt5.5	Larval keratin XLK OS=Xenopus laevis GN=krt5.5 PE=2 SV=1	580	2	2	0.5	0	2	3	2	2.5	1.25	0.321928	0.5	0.30103
tr|A1L2T3|A1L2T3_XENLA	107		0	0	krt5.6	LOC100036944 protein OS=Xenopus laevis GN=krt5.6 PE=2 SV=1	591	2	2	0.5	0	2	3	2	2.5	1.25	0.321928	0.5	0.30103
tr|B7ZSI2|B7ZSI2_XENLA	107		0	0	lk-a	Lk-a protein OS=Xenopus laevis GN=lk-a PE=2 SV=1	579	2	2	0.5	0	2	3	2	2.5	1.25	0.321928	0.5	0.30103
sp|O93479|ORC4_XENLA	194	C	0	11	orc4	Origin recognition complex subunit 4 OS=Xenopus laevis GN=orc4 PE=2 SV=1	432	3	1	0.5	2	2	3	2	2.5	1.25	0.321928	0.711723	0.147689
tr|Q3B8I2|Q3B8I2_XENLA	194		0	0	orc4	Origin recognition complex subunit 4 OS=Xenopus laevis GN=orc4 PE=2 SV=1	432	3	1	0.5	2	2	3	2	2.5	1.25	0.321928	0.711723	0.147689
tr|Q6PCF3|Q6PCF3_XENLA	45	C	6	0	MGC69166	MGC69166 protein OS=Xenopus laevis GN=MGC69166 PE=2 SV=1	304	1	1	0.5	2	0.5	2	1	1.25	1.25	0.321928	0.795167	0.0995415
sp|Q6GPL3|AUKBB_XENLA	80		0	0	aurkb-b	Aurora kinase B-B OS=Xenopus laevis GN=aurkb-b PE=2 SV=1	368	1	1	0.5	1	0.5	2	1	1.25	1.25	0.321928	0.795167	0.0995415
sp|Q91628|ORC2_XENLA	112	C	0	10	orc2	Origin recognition complex subunit 2 OS=Xenopus laevis GN=orc2 PE=2 SV=1	558	3	1	0.5	1	4	1	2	2.5	1.25	0.321928	0.810892	0.0910368
tr|Q5XGS9|Q5XGS9_XENLA	112		0	0	orc2	Orc2-a protein OS=Xenopus laevis GN=orc2 PE=2 SV=1	558	3	1	0.5	1	4	1	2	2.5	1.25	0.321928	0.810892	0.0910368
sp|Q9W6K1|MRE11_XENLA	19	C	48	0	mre11	Double-strand break repair protein MRE11 OS=Xenopus laevis GN=mre11 PE=2 SV=1	711	7	7	7	10	8	9	7	8.5	1.21429	0.280108	0.204833	0.688601
tr|Q92131|Q92131_XENLA	32		0	0	H2B	Histone H2B OS=Xenopus laevis GN=H2B PE=3 SV=1	126	5	5	4	6	6	6	5	6	1.2	0.263034	#DIV/0!	#DIV/0!
sp|Q52KW8|RCC2_XENLA	39	C	1	33	rcc2	Protein RCC2 homolog OS=Xenopus laevis GN=rcc2 PE=2 SV=1	513	5	5	7	5	7	5	5	6	1.2	0.263034	0.5	0.30103
tr|B9VQ38|B9VQ38_XENLA	39		0	0		Telophase disc 60 kDa protein (Fragment) OS=Xenopus laevis PE=2 SV=1	497	5	5	7	4	7	5	5	6	1.2	0.263034	0.5	0.30103
sp|Q6P9I7|SMC6_XENLA	100	C	23	0	smc6	Structural maintenance of chromosomes protein 6 OS=Xenopus laevis GN=smc6 PE=2 SV=1	1128	3	2	4	8	4	2	2.5	3	1.2	0.263034	0.711723	0.147689
sp|P70040|FEN1A_XENLA	223	C	0	9	fen1-a	Flap endonuclease 1-A OS=Xenopus laevis GN=fen1-a PE=1 SV=1	382	0.5	2	1	3	2	1	1.25	1.5	1.2	0.263034	0.810892	0.0910368
sp|P70054|FEN1B_XENLA	223		0	0	fen1-b	Flap endonuclease 1-B OS=Xenopus laevis GN=fen1-b PE=1 SV=1	382	0.5	2	1	3	2	1	1.25	1.5	1.2	0.263034	0.810892	0.0910368
sp|O13046|WDHD1_XENLA	179	C	0	26	wdhd1	WD repeat and HMG-box DNA-binding protein 1 OS=Xenopus laevis GN=wdhd1 PE=1 SV=1	1127	3	2	6	9	5	1	2.5	3	1.2	0.263034	0.845028	0.0731287
tr|Q2TAV8|Q2TAV8_XENLA	179		0	0	wdhd1	Wdhd1 protein OS=Xenopus laevis GN=wdhd1 PE=2 SV=1	1127	3	2	6	9	5	1	2.5	3	1.2	0.263034	0.845028	0.0731287
sp|A1L2H9|RFA2B_XENLA	13	C	6	17	rpa2-b	Replication protein A 32 kDa subunit-B OS=Xenopus laevis GN=rpa2-b PE=2 SV=1	274	3	3	5	5	4	3	3	3.5	1.16667	0.222392	0.5	0.30103
sp|P70094|H2AZL_XENLA	18	C	0	11	h2a.zl1	Histone H2A.Z-like OS=Xenopus laevis GN=h2a.zl1 PE=2 SV=3	128	3	3	2	3	4	3	3	3.5	1.16667	0.222392	0.5	0.30103
tr|Q5HZZ9|Q5HZZ9_XENLA	18		0	0	LOC397949	Histone H2A OS=Xenopus laevis GN=LOC397949 PE=2 SV=1	105	3	3	2	3	4	3	3	3.5	1.16667	0.222392	0.5	0.30103
tr|Q76LD2|Q76LD2_XENLA	22	C	20	0	rfc4	RFC2 protein OS=Xenopus laevis GN=rfc4 PE=2 SV=1	363	3	3	4	3	4	3	3	3.5	1.16667	0.222392	0.5	0.30103
sp|Q805A1|SMC5_XENLA	35	C	27	0	smc5	Structural maintenance of chromosomes protein 5 OS=Xenopus laevis GN=smc5 PE=2 SV=1	1065	3	3	7	7	4	3	3	3.5	1.16667	0.222392	0.5	0.30103
tr|A1L2N5|A1L2N5_XENLA	55		0	0	LOC100036902	LOC100036902 protein OS=Xenopus laevis GN=LOC100036902 PE=2 SV=1	377	2	4	3	4	3	4	3	3.5	1.16667	0.222392	0.711723	0.147689
sp|P84233|H32_XENLA	123	C	0	19		Histone H3.2 OS=Xenopus laevis PE=1 SV=2	136	3	3	2	4	5	2	3	3.5	1.16667	0.222392	0.795167	0.0995415
sp|P02302|H3C_XENLA	123		0	0	h3f3c	Histone H3.3C OS=Xenopus laevis GN=h3f3c PE=1 SV=2	136	3	3	2	4	5	2	3	3.5	1.16667	0.222392	0.795167	0.0995415
sp|Q6PI79|H33_XENLA	123		0	0		Histone H3.3 OS=Xenopus laevis PE=1 SV=3	136	3	3	2	4	5	2	3	3.5	1.16667	0.222392	0.795167	0.0995415
tr|Q92133|Q92133_XENLA	123		0	0	hist1h3g	Histone H3 OS=Xenopus laevis GN=hist1h3g PE=1 SV=1	136	3	3	2	4	5	2	3	3.5	1.16667	0.222392	0.795167	0.0995415
sp|P25979|UBF1A_XENLA	105	C	13	0	ubtf-a	Nucleolar transcription factor 1-A OS=Xenopus laevis GN=ubtf-a PE=2 SV=1	677	10	12	7	11	14	11	11	12.5	1.13636	0.184425	0.503838	0.297709
sp|P62799|H4_XENLA	67	C	19	29		Histone H4 OS=Xenopus laevis PE=1 SV=2	103	9	6	7	9	9	8	7.5	8.5	1.13333	0.180572	0.62483	0.204238
tr|Q32NN1|Q32NN1_XENLA	15	C	43	0	recql	MGC131022 protein OS=Xenopus laevis GN=recql PE=2 SV=1	652	8	8	7	8	9	9	8	9	1.125	0.169925	#DIV/0!	#DIV/0!
tr|A9UMQ0|A9UMQ0_XENLA	197	C	27	0	pnkp	LOC100137702 protein OS=Xenopus laevis GN=pnkp PE=2 SV=1	548	4	4	5	5	5	4	4	4.5	1.125	0.169925	0.5	0.30103
sp|Q8QFR2|HIRA_XENLA	50	C	65	5	hira	Protein HIRA OS=Xenopus laevis GN=hira PE=1 SV=2	1013	13	12	8	9	16	12	12.5	14	1.12	0.163499	0.588295	0.230405
tr|Q2TAH7|Q2TAH7_XENLA	0	C	1	0		Uncharacterized protein OS=Xenopus laevis PE=2 SV=1	508	7	10	9	9	10	9	8.5	9.5	1.11765	0.160465	0.62483	0.204238
tr|A2BDA0|A2BDA0_XENLA	67		0	0	hist1h4d	Histone H4 OS=Xenopus laevis GN=hist1h4d PE=2 SV=1	103	5	4	4	6	4	6	4.5	5	1.11111	0.152003	0.711723	0.147689
tr|B7ZR96|B7ZR96_XENLA	111	C	3	19	LOC397919	LOC397919 protein OS=Xenopus laevis GN=LOC397919 PE=2 SV=1	704	8	11	9	13	12	9	9.5	10.5	1.10526	0.14439	0.683772	0.165089
tr|Q06459|Q06459_XENLA	111	C	0	6	ncl	Nucleolin OS=Xenopus laevis GN=ncl PE=2 SV=1	705	9	11	9	14	12	10	10	11	1.1	0.137504	0.552786	0.257443
tr|B7ZR98|B7ZR98_XENLA	111		0	0	LOC397919	LOC397919 protein OS=Xenopus laevis GN=LOC397919 PE=2 SV=1	704	9	11	9	14	12	10	10	11	1.1	0.137504	0.552786	0.257443
sp|P31669|PARP1_XENLA	116		0	0	parp1	Poly [ADP-ribose] polymerase 1 (Fragment) OS=Xenopus laevis GN=parp1 PE=2 SV=1	998	5	5	5	6	7	4	5	5.5	1.1	0.137504	0.795167	0.0995415
sp|P25980|UBF1B_XENLA	105	C	0	64	ubtf-b	Nucleolar transcription factor 1-B OS=Xenopus laevis GN=ubtf-b PE=2 SV=1	701	11	11	7	11	13	11	11	12	1.09091	0.125531	0.5	0.30103
tr|Q8AVJ8|Q8AVJ8_XENLA	105		0	0	ubtf-b	Ubtf-b protein OS=Xenopus laevis GN=ubtf-b PE=2 SV=1	701	11	11	7	11	13	11	11	12	1.09091	0.125531	0.5	0.30103
tr|Q2NLA7|Q2NLA7_XENLA	116	C	3	32	parp1	Poly [ADP-ribose] polymerase OS=Xenopus laevis GN=parp1 PE=2 SV=1	1011	6	5	5	7	7	5	5.5	6	1.09091	0.125531	0.711723	0.147689
sp|P23787|TERA_XENLA	20	C	62	6	vcp	Transitional endoplasmic reticulum ATPase OS=Xenopus laevis GN=vcp PE=1 SV=3	805	11	10	12	13	12	10	10.5	11	1.04762	0.0671142	0.711723	0.147689
tr|Q640G9|Q640G9_XENLA	37	C	63	0	hcfc1	LOC494675 protein OS=Xenopus laevis GN=hcfc1 PE=2 SV=1	2101	9	13	7	11	13	10	11	11.5	1.04545	0.0641303	0.861242	0.0648746
sp|Q800K6|TOB1A_XENLA	3	C	14	67	topbp1-A	DNA topoisomerase 2-binding protein 1-A OS=Xenopus laevis GN=topbp1-A PE=1 SV=2	1513	14	8	19	17	12	11	11	11.5	1.04545	0.0641303	0.895176	0.0480917
tr|Q6DD35|Q6DD35_XENLA	60		0	0	HELLS	HELLS protein (Fragment) OS=Xenopus laevis GN=HELLS PE=2 SV=1	756	16	10	11	15	14	13	13	13.5	1.03846	0.0544478	0.895176	0.0480917
tr|Q4V835|Q4V835_XENLA	60	C	2	79	hells	HELLS protein OS=Xenopus laevis GN=hells PE=2 SV=1	838	16	11	11	15	15	13	13.5	14	1.03704	0.0524674	0.87723	0.0568864
sp|Q6GM74|H2AV_XENLA	18		0	0	h2afv	Histone H2A.V OS=Xenopus laevis GN=h2afv PE=2 SV=3	128	2	2	1	2	2	2	2	2	1	0	#DIV/0!	#DIV/0!
tr|Q4KLX2|Q4KLX2_XENLA	46		0	0	raph1	MGC114656 protein OS=Xenopus laevis GN=raph1 PE=2 SV=1	365	2	2	1	2	2	2	2	2	1	0	#DIV/0!	#DIV/0!
tr|Q7ZTM5|Q7ZTM5_XENLA	115	C	6	0	rfc5	Rfc5-prov protein OS=Xenopus laevis GN=rfc5 PE=2 SV=1	335	2	2	3	2	2	2	2	2	1	0	#DIV/0!	#DIV/0!
tr|Q802A8|Q802A8_XENLA	226	C	0	13	cbx3	Cbx3 protein OS=Xenopus laevis GN=cbx3 PE=2 SV=1	174	2	2	2	3	2	2	2	2	1	0	#DIV/0!	#DIV/0!
tr|O42156|O42156_XENLA	226		0	0	XHp1-gamma	Heterochromatin protein 1 gamma (Fragment) OS=Xenopus laevis GN=XHp1-gamma PE=2 SV=1	171	2	2	2	3	2	2	2	2	1	0	#DIV/0!	#DIV/0!
tr|Q7ZWZ6|Q7ZWZ6_XENLA	226		0	0	cbx3	Cbx3-prov protein OS=Xenopus laevis GN=cbx3 PE=2 SV=1	174	2	2	2	3	2	2	2	2	1	0	#DIV/0!	#DIV/0!
tr|Q5XGU0|Q5XGU0_XENLA	227	C	0	6	krt17	LOC495266 protein OS=Xenopus laevis GN=krt17 PE=2 SV=1	452	2	2	2	2	2	2	2	2	1	0	#DIV/0!	#DIV/0!
sp|P05781|K1C4_XENLA	227		0	0	xk81b2	Keratin, type I cytoskeletal 47 kDa OS=Xenopus laevis GN=xk81b2 PE=2 SV=1	419	2	2	2	2	2	2	2	2	1	0	#DIV/0!	#DIV/0!
tr|E3WF12|E3WF12_XENLA	227		0	0	FGK	Fin and gill-specific type-1 keratin OS=Xenopus laevis GN=FGK PE=2 SV=1	424	2	2	2	2	2	2	2	2	1	0	#DIV/0!	#DIV/0!
tr|Q4QR57|Q4QR57_XENLA	227		0	0	krt12	LOC398464 protein OS=Xenopus laevis GN=krt12 PE=2 SV=1	454	2	2	2	2	2	2	2	2	1	0	#DIV/0!	#DIV/0!
tr|Q6DKC7|Q6DKC7_XENLA	227		0	0	MGC84118	MGC84118 protein OS=Xenopus laevis GN=MGC84118 PE=2 SV=1	458	2	2	2	2	2	2	2	2	1	0	#DIV/0!	#DIV/0!
tr|Q7ZY83|Q7ZY83_XENLA	227		0	0	LOC398464	LOC398464 protein (Fragment) OS=Xenopus laevis GN=LOC398464 PE=2 SV=1	469	2	2	2	2	2	2	2	2	1	0	#DIV/0!	#DIV/0!
tr|Q640I7|Q640I7_XENLA	233	C	1	9	pias4	LOC494663 protein OS=Xenopus laevis GN=pias4 PE=2 SV=1	501	2	2	1	1	2	2	2	2	1	0	#DIV/0!	#DIV/0!
sp|Q3B8D5|KATL2_XENLA	20		0	0	katnal2	Katanin p60 ATPase-containing subunit A-like 2 OS=Xenopus laevis GN=katnal2 PE=2 SV=1	505	1	1	1	1	1	1	1	1	1	0	#DIV/0!	#DIV/0!
tr|Q7ZZU5|Q7ZZU5_XENLA	33	C	10	0	rad9a	PCNA-like DNA checkpoint protein Rad9 OS=Xenopus laevis GN=rad9a PE=2 SV=1	377	1	1	3	3	1	1	1	1	1	0	#DIV/0!	#DIV/0!
tr|Q6AZP5|Q6AZP5_XENLA	49		0	0	rpa3-prov	Rpa3-prov protein OS=Xenopus laevis GN=rpa3-prov PE=2 SV=1	121	1	1	0.5	1	1	1	1	1	1	0	#DIV/0!	#DIV/0!
sp|Q63ZP1|PHF10_XENLA	62	C	1	3	phf10	PHD finger protein 10 OS=Xenopus laevis GN=phf10 PE=2 SV=2	506	1	1	0.5	0	1	1	1	1	1	0	#DIV/0!	#DIV/0!
tr|Q7ZX99|Q7ZX99_XENLA	63	C	0	1	Tia1	Tia1 protein (Fragment) OS=Xenopus laevis GN=Tia1 PE=2 SV=1	427	1	1	0.5	2	1	1	1	1	1	0	#DIV/0!	#DIV/0!
tr|Q90WN1|Q90WN1_XENLA	63		0	0	tiar	TIAR protein (Fragment) OS=Xenopus laevis GN=tiar PE=2 SV=1	389	1	1	0.5	2	1	1	1	1	1	0	#DIV/0!	#DIV/0!
tr|Q5SDB4|Q5SDB4_XENLA	66	C	0	10	atrip	ATR-interacting protein OS=Xenopus laevis GN=atrip PE=2 SV=1	801	1	1	2	4	1	1	1	1	1	0	#DIV/0!	#DIV/0!
tr|B7ZS90|B7ZS90_XENLA	66		0	0		Uncharacterized protein OS=Xenopus laevis PE=2 SV=1	801	1	1	2	4	1	1	1	1	1	0	#DIV/0!	#DIV/0!
tr|B7ZS92|B7ZS92_XENLA	66		0	0	atrip	Atrip protein OS=Xenopus laevis GN=atrip PE=2 SV=1	801	1	1	2	4	1	1	1	1	1	0	#DIV/0!	#DIV/0!
tr|Q71R48|Q71R48_XENLA	78		0	0	BRM	BRM protein (Fragment) OS=Xenopus laevis GN=BRM PE=2 SV=1	309	1	1	1	1	1	1	1	1	1	0	#DIV/0!	#DIV/0!
sp|Q8QHA5|DNA2_XENLA	108	C	7	0	dna2	DNA replication ATP-dependent helicase/nuclease DNA2 OS=Xenopus laevis GN=dna2 PE=1 SV=1	1053	1	1	1	2	1	1	1	1	1	0	#DIV/0!	#DIV/0!
tr|A6H8J3|A6H8J3_XENLA	185	C	0	8	dclre1a	LOC733261 protein OS=Xenopus laevis GN=dclre1a PE=2 SV=1	932	1	1	1	3	1	1	1	1	1	0	#DIV/0!	#DIV/0!
tr|Q4V7N1|Q4V7N1_XENLA	185		0	0	LOC733261	LOC733261 protein (Fragment) OS=Xenopus laevis GN=LOC733261 PE=2 SV=1	526	1	1	1	3	1	1	1	1	1	0	#DIV/0!	#DIV/0!
sp|P63282|UBC9_XENLA	187	C	5	0	ube2i	SUMO-conjugating enzyme UBC9 OS=Xenopus laevis GN=ube2i PE=1 SV=1	158	1	1	0.5	1	1	1	1	1	1	0	#DIV/0!	#DIV/0!
sp|P08777|K1C1_XENLA	227		0	0	xk81a1	Keratin, type I cytoskeletal 47 kDa OS=Xenopus laevis GN=xk81a1 PE=2 SV=1	429	1	1	1	1	1	1	1	1	1	0	#DIV/0!	#DIV/0!
sp|P08802|K118A_XENLA	227		0	0	krt18-a	Keratin, type I cytoskeletal 18-A OS=Xenopus laevis GN=krt18-a PE=2 SV=2	428	1	1	1	1	1	1	1	1	1	0	#DIV/0!	#DIV/0!
sp|Q7SY65|K118B_XENLA	227		0	0	krt18-b	Keratin, type I cytoskeletal 18-B OS=Xenopus laevis GN=krt18-b PE=2 SV=1	432	1	1	1	1	1	1	1	1	1	0	#DIV/0!	#DIV/0!
tr|Q2VPN9|Q2VPN9_XENLA	227		0	0	xk81a1	MGC68905 protein OS=Xenopus laevis GN=xk81a1 PE=2 SV=1	437	1	1	1	1	1	1	1	1	1	0	#DIV/0!	#DIV/0!
tr|Q6DDD5|Q6DDD5_XENLA	227		0	0	krt16	Krt16-prov protein OS=Xenopus laevis GN=krt16 PE=2 SV=1	423	1	1	1	1	1	1	1	1	1	0	#DIV/0!	#DIV/0!
tr|Q7T0X6|Q7T0X6_XENLA	227		0	0	MGC68905	MGC68905 protein OS=Xenopus laevis GN=MGC68905 PE=2 SV=1	437	1	1	1	1	1	1	1	1	1	0	#DIV/0!	#DIV/0!
tr|Q98UJ1|Q98UJ1_XENLA	227		0	0	xak-b	Adult keratin XAK-B OS=Xenopus laevis GN=xak-b PE=2 SV=1	497	1	1	1	1	1	1	1	1	1	0	#DIV/0!	#DIV/0!
sp|Q6PAF4|NSE1_XENLA	230	C	6	0	nsmce1	Non-structural maintenance of chromosomes element 1 homolog OS=Xenopus laevis GN=nsmce1 PE=2 SV=1	270	1	1	1	1	1	1	1	1	1	0	#DIV/0!	#DIV/0!
tr|Q6DCJ2|Q6DCJ2_XENLA	290	C	4	0	ell2	MGC82755 protein OS=Xenopus laevis GN=ell2 PE=2 SV=1	494	1	1	0.5	0	1	1	1	1	1	0	#DIV/0!	#DIV/0!
tr|Q6GQK3|Q6GQK3_XENLA	313	C	6	0	dpy30	MGC79089 protein OS=Xenopus laevis GN=dpy30 PE=2 SV=1	99	1	1	1	1	1	1	1	1	1	0	#DIV/0!	#DIV/0!
tr|Q4VT50|Q4VT50_XENLA	53	C	69	0	fancd2	Fanconi anemia complementation group D2 OS=Xenopus laevis GN=fancd2 PE=2 SV=1	1443	11	11	10	15	13	9	11	11	1	0	1	0
sp|Q7ZZY3|TOB1B_XENLA	3		0	0	topbp1-B	DNA topoisomerase 2-binding protein 1-B OS=Xenopus laevis GN=topbp1-B PE=2 SV=1	1513	12	7	15	14	11	8	9.5	9.5	1	0	1	0
sp|Q9W602|SSRP1_XENLA	46	C	43	11	ssrp1	FACT complex subunit SSRP1 OS=Xenopus laevis GN=ssrp1 PE=1 SV=1	693	9	10	7	9	11	8	9.5	9.5	1	0	1	0
sp|Q6GMY9|XPO2_XENLA	2	C	20	0	cse1l	Exportin-2 OS=Xenopus laevis GN=cse1l PE=2 SV=1	971	5	3	2	2	5	3	4	4	1	0	1	0
tr|Q6INX5|Q6INX5_XENLA	29		0	0	smarcc2	MGC80068 protein OS=Xenopus laevis GN=smarcc2 PE=2 SV=1	1109	2	4	1	3	4	2	3	3	1	0	1	0
tr|Q7ZY24|Q7ZY24_XENLA	140	C	15	0		Hmgb3-prov protein OS=Xenopus laevis PE=2 SV=1	202	4	2	2	1	4	2	3	3	1	0	1	0
sp|Q9DE26|RUVB1_XENLA	152	C	0	21	ruvbl1	RuvB-like 1 OS=Xenopus laevis GN=ruvbl1 PE=2 SV=1	456	5	4	2	1	4	5	4.5	4.5	1	0	1	0
tr|Q6GR29|Q6GR29_XENLA	152		0	0	ruvbl1	Ruvbl1 protein OS=Xenopus laevis GN=ruvbl1 PE=2 SV=1	456	5	4	2	1	4	5	4.5	4.5	1	0	1	0
sp|P05782|K1C3_XENLA	227	C	0	21	xk81b1	Keratin, type I cytoskeletal 47 kDa (Fragment) OS=Xenopus laevis GN=xk81b1 PE=3 SV=2	280	3	4	3	4	4	3	3.5	3.5	1	0	1	0
sp|P10995|ACT2_XENLA	55	C	0	21	act2	Actin, alpha skeletal muscle 2 OS=Xenopus laevis GN=act2 PE=2 SV=1	377	3	4	3	4	3	4	3.5	3.5	1	0	1	0
sp|P04751|ACTC_XENLA	55		0	0	actc1	Actin, alpha cardiac muscle 1 OS=Xenopus laevis GN=actc1 PE=2 SV=1	377	3	4	3	4	3	4	3.5	3.5	1	0	1	0
sp|P04752|ACT3_XENLA	55		0	0	act3	Actin, alpha skeletal muscle 3 OS=Xenopus laevis GN=act3 PE=2 SV=2	377	3	4	3	4	3	4	3.5	3.5	1	0	1	0
sp|P20399|ACT2_XENTR	55		0	0		Actin, alpha cardiac muscle 2 OS=Xenopus tropicalis PE=2 SV=1	377	3	4	3	4	3	4	3.5	3.5	1	0	1	0
sp|Q6P640|ACTC_XENTR	55		0	0	actc1	Actin, alpha cardiac muscle 1 OS=Xenopus tropicalis GN=actc1 PE=2 SV=1	377	3	4	3	4	3	4	3.5	3.5	1	0	1	0
sp|Q6P8G3|ACT3_XENTR	55		0	0	act3	Actin, alpha sarcomeric/skeletal OS=Xenopus tropicalis GN=act3 PE=2 SV=1	377	3	4	3	4	3	4	3.5	3.5	1	0	1	0
tr|Q52QH5|Q52QH5_XENLA	55		0	0		Smooth muscle alpha actin OS=Xenopus laevis PE=2 SV=1	377	3	4	3	4	3	4	3.5	3.5	1	0	1	0
tr|Q6IP22|Q6IP22_XENLA	55		0	0	acta1	MGC79012 protein OS=Xenopus laevis GN=acta1 PE=2 SV=1	377	3	4	3	4	3	4	3.5	3.5	1	0	1	0
tr|Q6NS10|Q6NS10_XENLA	55		0	0	acta2	MGC78870 protein OS=Xenopus laevis GN=acta2 PE=2 SV=1	377	3	4	3	4	3	4	3.5	3.5	1	0	1	0
tr|Q7SYU4|Q7SYU4_XENLA	55		0	0	MGC64484	MGC64484 protein OS=Xenopus laevis GN=MGC64484 PE=2 SV=1	377	3	4	3	4	3	4	3.5	3.5	1	0	1	0
tr|Q7ZWR7|Q7ZWR7_XENLA	55		0	0		MGC53823 protein OS=Xenopus laevis PE=2 SV=1	377	3	4	3	4	3	4	3.5	3.5	1	0	1	0
tr|Q3B8L3|Q3B8L3_XENLA	78		0	0		Uncharacterized protein (Fragment) OS=Xenopus laevis PE=2 SV=1	571	3	2	2	3	3	2	2.5	2.5	1	0	1	0
tr|Q4V873|Q4V873_XENLA	78		0	0		Uncharacterized protein (Fragment) OS=Xenopus laevis PE=2 SV=1	571	3	2	2	3	3	2	2.5	2.5	1	0	1	0
tr|Q5XHK1|Q5XHK1_XENLA	78		0	0		Uncharacterized protein (Fragment) OS=Xenopus laevis PE=2 SV=1	571	3	2	2	3	3	2	2.5	2.5	1	0	1	0
sp|P17507|EF1A2_XENLA	173	C	5	9	eef1ao	Elongation factor 1-alpha, oocyte form OS=Xenopus laevis GN=eef1ao PE=1 SV=1	461	2	3	1	3	3	2	2.5	2.5	1	0	1	0
sp|P17508|EF1A3_XENLA	173	C	0	5		Elongation factor 1-alpha, oocyte form OS=Xenopus laevis PE=1 SV=2	461	2	3	2	2	3	2	2.5	2.5	1	0	1	0
tr|Q7SYT0|Q7SYT0_XENLA	173		0	0	eef1a2	Elongation factor 1-alpha OS=Xenopus laevis GN=eef1a2 PE=2 SV=1	463	2	3	2	2	3	2	2.5	2.5	1	0	1	0
tr|Q7ZXA2|Q7ZXA2_XENLA	173		0	0	eef1a-o1	Elongation factor 1-alpha OS=Xenopus laevis GN=eef1a-o1 PE=2 SV=1	461	2	3	2	2	3	2	2.5	2.5	1	0	1	0
tr|Q7ZXK5|Q7ZXK5_XENLA	195	C	5	10	MGC52578	MGC52578 protein OS=Xenopus laevis GN=MGC52578 PE=2 SV=1	212	2	3	3	2	3	2	2.5	2.5	1	0	1	0
tr|A6YGN3|A6YGN3_XENLA	245	C	0	22	FANCG	Fanconi anemia complementation group G variant 2 OS=Xenopus laevis GN=FANCG PE=2 SV=1	591	3	4	3	5	3	4	3.5	3.5	1	0	1	0
tr|A6Y874|A6Y874_XENLA	245		0	0	fancg	Fanconi anemia complementation group G OS=Xenopus laevis GN=fancg PE=2 SV=1	640	3	4	3	5	3	4	3.5	3.5	1	0	1	0
sp|Q8UVR5|BAZ1A_XENLA	253	C	12	0	baz1a	Bromodomain adjacent to zinc finger domain protein 1A (Fragment) OS=Xenopus laevis GN=baz1a PE=2 SV=1	627	3	2	0.5	2	3	2	2.5	2.5	1	0	1	0
sp|Q6GNV6|COM1_XENLA	14	C	13	0	rbbp8	DNA endonuclease RBBP8 OS=Xenopus laevis GN=rbbp8 PE=1 SV=1	856	2	1	3	4	2	1	1.5	1.5	1	0	1	0
tr|O93513|O93513_XENLA	70	C	0	7	orc3	Origin recognition complex associated protein p81 OS=Xenopus laevis GN=orc3 PE=2 SV=1	709	2	1	0.5	1	2	1	1.5	1.5	1	0	1	0
tr|Q7ZTR4|Q7ZTR4_XENLA	70		0	0	orc3l	Orc3l protein OS=Xenopus laevis GN=orc3l PE=2 SV=1	709	2	1	0.5	1	2	1	1.5	1.5	1	0	1	0
sp|P22232|FBRL_XENLA	76	C	0	7	fbl	rRNA 2'-O-methyltransferase fibrillarin OS=Xenopus laevis GN=fbl PE=2 SV=1	323	1	2	0.5	1	2	1	1.5	1.5	1	0	1	0
tr|Q6GNA5|Q6GNA5_XENLA	76		0	0	LOC398434	LOC398434 protein OS=Xenopus laevis GN=LOC398434 PE=2 SV=1	323	1	2	0.5	1	2	1	1.5	1.5	1	0	1	0
tr|Q7ZX93|Q7ZX93_XENLA	76		0	0	LOC398434	LOC398434 protein (Fragment) OS=Xenopus laevis GN=LOC398434 PE=2 SV=1	340	1	2	0.5	1	2	1	1.5	1.5	1	0	1	0
sp|P08776|K2C8_XENLA	107	C	2	0		Keratin, type II cytoskeletal 8 OS=Xenopus laevis PE=2 SV=1	502	1	2	0.5	0	2	1	1.5	1.5	1	0	1	0
tr|Q6XV80|Q6XV80_XENLA	119	C	2	14	nbn	Nibrin OS=Xenopus laevis GN=nbn PE=1 SV=1	763	2	3	2	4	2	3	2.5	2.5	1	0	1	0
tr|Q68F48|Q68F48_XENLA	138	C	0	13	LOC446279	LOC446279 protein (Fragment) OS=Xenopus laevis GN=LOC446279 PE=2 SV=1	479	3	2	1	2	2	3	2.5	2.5	1	0	1	0
tr|Q2KHQ3|Q2KHQ3_XENLA	138		0	0	daxx	LOC446279 protein OS=Xenopus laevis GN=daxx PE=2 SV=1	916	3	2	1	2	2	3	2.5	2.5	1	0	1	0
tr|A0JMV0|A0JMV0_XENLA	148	C	0	11	MGC154789	MGC154789 protein OS=Xenopus laevis GN=MGC154789 PE=2 SV=1	305	2	1	1	4	2	1	1.5	1.5	1	0	1	0
tr|Q6GMC1|Q6GMC1_XENLA	148		0	0	rps27a	MGC81889 protein OS=Xenopus laevis GN=rps27a PE=2 SV=1	156	2	1	1	4	2	1	1.5	1.5	1	0	1	0
tr|Q6GQF3|Q6GQF3_XENLA	148		0	0	uba52	MGC80109 protein OS=Xenopus laevis GN=uba52 PE=2 SV=1	128	2	1	1	4	2	1	1.5	1.5	1	0	1	0
tr|Q7SY79|Q7SY79_XENLA	148		0	0	ubc	Ubc-prov protein OS=Xenopus laevis GN=ubc PE=2 SV=1	609	2	1	1	4	2	1	1.5	1.5	1	0	1	0
tr|Q7ZXG5|Q7ZXG5_XENLA	148		0	0	ubb	MGC53081 protein OS=Xenopus laevis GN=ubb PE=2 SV=1	380	2	1	1	4	2	1	1.5	1.5	1	0	1	0
tr|Q7ZWY6|Q7ZWY6_XENLA	160	C	5	0	rpl9	Rpl9-prov protein OS=Xenopus laevis GN=rpl9 PE=2 SV=1	192	1	1	0.5	1	2	0	1	1	1	0	1	0
sp|P13549|EF1A0_XENLA	173		0	0	eef1as	Elongation factor 1-alpha, somatic form OS=Xenopus laevis GN=eef1as PE=2 SV=1	462	1	2	1	2	2	1	1.5	1.5	1	0	1	0
tr|A1L3K0|A1L3K0_XENLA	173		0	0	LOC100037028	Elongation factor 1-alpha (Fragment) OS=Xenopus laevis GN=LOC100037028 PE=2 SV=1	470	1	2	1	2	2	1	1.5	1.5	1	0	1	0
tr|Q640D9|Q640D9_XENLA	173		0	0	LOC494720	Elongation factor 1-alpha OS=Xenopus laevis GN=LOC494720 PE=2 SV=1	461	1	2	1	2	2	1	1.5	1.5	1	0	1	0
tr|Q91764|Q91764_XENLA	195		0	0		HMG-X protein OS=Xenopus laevis PE=2 SV=1	212	1	2	2	2	2	1	1.5	1.5	1	0	1	0
tr|Q52L33|Q52L33_XENLA	210	C	2	0	smarcd3	MGC115001 protein OS=Xenopus laevis GN=smarcd3 PE=2 SV=1	369	1	2	0.5	2	2	1	1.5	1.5	1	0	1	0
tr|Q6DE48|Q6DE48_XENLA	306	C	7	0	rbbp5	Rbbp5-prov protein OS=Xenopus laevis GN=rbbp5 PE=2 SV=1	501	1	2	1	0	2	1	1.5	1.5	1	0	1	0
sp|Q91917|RA51B_XENLA	34		0	0	rad51-b	DNA repair protein RAD51 homolog B OS=Xenopus laevis GN=rad51-b PE=2 SV=1	336	1	0	1	1	1	0	0.5	0.5	1	0	1	0
tr|Q68EU5|Q68EU5_XENLA	63	C	0	7	tia1	MGC84540 protein OS=Xenopus laevis GN=tia1 PE=2 SV=1	389	2	1	0.5	1	1	2	1.5	1.5	1	0	1	0
tr|Q6DEF1|Q6DEF1_XENLA	63		0	0		Uncharacterized protein OS=Xenopus laevis PE=2 SV=1	385	2	1	0.5	1	1	2	1.5	1.5	1	0	1	0
tr|Q90WN0|Q90WN0_XENLA	63		0	0	tia-1	TIA-1 protein (Fragment) OS=Xenopus laevis GN=tia-1 PE=2 SV=1	388	2	1	0.5	1	1	2	1.5	1.5	1	0	1	0
sp|Q640I9|KDM2B_XENLA	88	C	2	0	kdm2b	Lysine-specific demethylase 2B OS=Xenopus laevis GN=kdm2b PE=2 SV=1	1259	1	0	0.5	0	1	0	0.5	0.5	1	0	1	0
tr|Q561K7|Q561K7_XENLA	96	C	0	2	LOC733205	LOC733205 protein (Fragment) OS=Xenopus laevis GN=LOC733205 PE=2 SV=1	470	1	0	0.5	0	1	0	0.5	0.5	1	0	1	0
tr|G4VV19|G4VV19_XENLA	96		0	0		Acid sensing ion channel 4 (Fragment) OS=Xenopus laevis PE=2 SV=1	535	1	0	0.5	0	1	0	0.5	0.5	1	0	1	0
tr|Q90X95|Q90X95_XENLA	117	C	0	10	bard1	BRCA1-associated RING domain protein OS=Xenopus laevis GN=bard1 PE=1 SV=1	772	2	1	1	3	1	2	1.5	1.5	1	0	1	0
tr|B7ZR58|B7ZR58_XENLA	117		0	0	BARD1	BARD1 protein OS=Xenopus laevis GN=BARD1 PE=2 SV=1	769	2	1	1	3	1	2	1.5	1.5	1	0	1	0
sp|P62972|UBIQP_XENLA	148		0	0		Polyubiquitin (Fragment) OS=Xenopus laevis PE=1 SV=2	167	1	0	0.5	3	1	0	0.5	0.5	1	0	1	0
tr|B1WBC6|B1WBC6_XENLA	174	C	3	0	atad2b	LOC100158428 protein OS=Xenopus laevis GN=atad2b PE=2 SV=1	872	1	0	0.5	1	1	0	0.5	0.5	1	0	1	0
sp|Q5FWM3|SOX3B_XENLA	241	C	2	0	sox3-b	Transcription factor Sox-3-B OS=Xenopus laevis GN=sox3-b PE=2 SV=1	307	1	0	0.5	0	1	0	0.5	0.5	1	0	1	0
tr|Q8AY70|Q8AY70_XENLA	323	C	3	0	gapdh	Glyceraldehyde-3-phosphate dehydrogenase OS=Xenopus laevis GN=gapdh PE=2 SV=1	333	1	0	0.5	1	1	0	0.5	0.5	1	0	1	0
sp|P25183|RCC1_XENLA	336	C	0	3	rcc1	Regulator of chromosome condensation OS=Xenopus laevis GN=rcc1 PE=2 SV=1	424	1	0	0.5	1	1	0	0.5	0.5	1	0	1	0
tr|Q08B75|Q08B75_XENLA	336		0	0	chc1-a	Chc1-a protein OS=Xenopus laevis GN=chc1-a PE=2 SV=1	420	1	0	0.5	1	1	0	0.5	0.5	1	0	1	0
tr|Q32N89|Q32N89_XENLA	336		0	0	rcc1	Chc1-b protein OS=Xenopus laevis GN=rcc1 PE=2 SV=1	420	1	0	0.5	1	1	0	0.5	0.5	1	0	1	0
tr|Q6IP87|Q6IP87_XENLA	336		0	0	chc1-b-prov	Chc1-b-prov protein OS=Xenopus laevis GN=chc1-b-prov PE=2 SV=1	420	1	0	0.5	1	1	0	0.5	0.5	1	0	1	0
tr|Q6IRM1|Q6IRM1_XENLA	336		0	0	chc1-a-prov	Chc1-a-prov protein (Fragment) OS=Xenopus laevis GN=chc1-a-prov PE=2 SV=1	417	1	0	0.5	1	1	0	0.5	0.5	1	0	1	0
tr|Q58M12|Q58M12_XENLA	10	C	0	1		DNA polymerase kappa OS=Xenopus laevis PE=2 SV=1	862	0.5	0	0.5	1	0.5	0	0.25	0.25	1	0	1	0
tr|Q6DFE4|Q6DFE4_XENLA	10		0	0	polk	Polk-prov protein OS=Xenopus laevis GN=polk PE=2 SV=1	862	0.5	0	0.5	1	0.5	0	0.25	0.25	1	0	1	0
tr|Q5XH69|Q5XH69_XENLA	47	C	1	0	LOC495053	LOC495053 protein (Fragment) OS=Xenopus laevis GN=LOC495053 PE=2 SV=1	1315	0.5	0	0.5	1	0.5	0	0.25	0.25	1	0	1	0
sp|Q3KPW1|RNP1B_XENLA	77	C	0	1	rnps1-b	RNA-binding protein with serine-rich domain 1-B OS=Xenopus laevis GN=rnps1-b PE=2 SV=1	283	0.5	0	0.5	1	0.5	0	0.25	0.25	1	0	1	0
sp|Q5XG24|RNP1A_XENLA	77		0	0	rnps1-a	RNA-binding protein with serine-rich domain 1-A OS=Xenopus laevis GN=rnps1-a PE=2 SV=1	283	0.5	0	0.5	1	0.5	0	0.25	0.25	1	0	1	0
tr|A0JMT6|A0JMT6_XENLA	85		0	0	LOC443577	LOC443577 protein (Fragment) OS=Xenopus laevis GN=LOC443577 PE=2 SV=1	930	0.5	0	1	1	0.5	0	0.25	0.25	1	0	1	0
tr|A1A5K3|A1A5K3_XENLA	85		0	0	chd7	LOC443577 protein OS=Xenopus laevis GN=chd7 PE=2 SV=1	1848	0.5	0	1	1	0.5	0	0.25	0.25	1	0	1	0
tr|O73623|O73623_XENLA	85		0	0	mespa	Thylacine 1 OS=Xenopus laevis GN=mespa PE=2 SV=1	308	0.5	0	1	1	0.5	0	0.25	0.25	1	0	1	0
tr|Q2VPG5|Q2VPG5_XENLA	85		0	0	LOC733434	LOC733434 protein (Fragment) OS=Xenopus laevis GN=LOC733434 PE=2 SV=1	873	0.5	0	1	1	0.5	0	0.25	0.25	1	0	1	0
tr|Q5XGK3|Q5XGK3_XENLA	85		0	0	nhlh1	LOC495280 protein OS=Xenopus laevis GN=nhlh1 PE=2 SV=1	128	0.5	0	1	1	0.5	0	0.25	0.25	1	0	1	0
tr|Q6DJL9|Q6DJL9_XENLA	85		0	0	MGC82047	MGC82047 protein OS=Xenopus laevis GN=MGC82047 PE=2 SV=1	324	0.5	0	1	1	0.5	0	0.25	0.25	1	0	1	0
tr|Q9YH15|Q9YH15_XENLA	85		0	0	nhlh1	Transcription factor XHEN1 OS=Xenopus laevis GN=nhlh1 PE=2 SV=1	128	0.5	0	1	1	0.5	0	0.25	0.25	1	0	1	0
tr|B1H1S6|B1H1S6_XENLA	99		0	0	LOC100158294	LOC100158294 protein (Fragment) OS=Xenopus laevis GN=LOC100158294 PE=2 SV=1	581	0.5	0	1	1	0.5	0	0.25	0.25	1	0	1	0
tr|Q6GPA9|Q6GPA9_XENLA	110	C	2	0	sf3a1	MGC80562 protein OS=Xenopus laevis GN=sf3a1 PE=2 SV=1	802	0.5	0	0.5	2	0.5	0	0.25	0.25	1	0	1	0
sp|Q4KLQ5|WDR76_XENLA	129	C	1	0	wdr76	WD repeat-containing protein 76 OS=Xenopus laevis GN=wdr76 PE=2 SV=1	580	0.5	0	0.5	1	0.5	0	0.25	0.25	1	0	1	0
tr|Q7ZTA5|Q7ZTA5_XENLA	207	C	0	3	rad17	Rad17 OS=Xenopus laevis GN=rad17 PE=2 SV=1	674	0.5	0	0.5	3	0.5	0	0.25	0.25	1	0	1	0
tr|Q6INE0|Q6INE0_XENLA	207		0	0	rad17	Rad17 protein OS=Xenopus laevis GN=rad17 PE=2 SV=1	674	0.5	0	0.5	3	0.5	0	0.25	0.25	1	0	1	0
tr|Q7ZZU6|Q7ZZU6_XENLA	207		0	0	Rad17	RFC-like DNA checkpoint protein Rad17 OS=Xenopus laevis GN=Rad17 PE=2 SV=1	674	0.5	0	0.5	3	0.5	0	0.25	0.25	1	0	1	0
tr|W0US81|W0US81_XENLA	221	C	0	2	rad18	E3 ubiquitin ligase (Fragment) OS=Xenopus laevis GN=rad18 PE=2 SV=1	243	0.5	0	1	1	0.5	0	0.25	0.25	1	0	1	0
tr|W0UQE8|W0UQE8_XENLA	221		0	0	rad18	E3 ubiquitin ligase OS=Xenopus laevis GN=rad18 PE=2 SV=1	492	0.5	0	1	1	0.5	0	0.25	0.25	1	0	1	0
tr|W0USK2|W0USK2_XENLA	221		0	0	rad18	E3 ubiquitin ligase (Fragment) OS=Xenopus laevis GN=rad18 PE=2 SV=1	250	0.5	0	1	1	0.5	0	0.25	0.25	1	0	1	0
tr|Q66KX3|Q66KX3_XENLA	229	C	1	0	rpl23a	MGC85348 protein OS=Xenopus laevis GN=rpl23a PE=2 SV=1	155	0.5	0	0.5	1	0.5	0	0.25	0.25	1	0	1	0
tr|Q58M11|Q58M11_XENLA	247	C	0	1		DNA polymerase eta OS=Xenopus laevis PE=2 SV=1	684	0.5	0	0.5	1	0.5	0	0.25	0.25	1	0	1	0
tr|Q6DCL9|Q6DCL9_XENLA	247		0	0	polh	Polh-prov protein OS=Xenopus laevis GN=polh PE=2 SV=1	684	0.5	0	0.5	1	0.5	0	0.25	0.25	1	0	1	0
sp|O57683|SF3B1_XENLA	258	C	1	1	sf3b1	Splicing factor 3B subunit 1 OS=Xenopus laevis GN=sf3b1 PE=2 SV=1	1307	0.5	0	0.5	2	0.5	0	0.25	0.25	1	0	1	0
tr|Q4QR12|Q4QR12_XENLA	258		0	0	Sf3b1	Sf3b1 protein OS=Xenopus laevis GN=Sf3b1 PE=2 SV=1	814	0.5	0	0.5	1	0.5	0	0.25	0.25	1	0	1	0
tr|Q7ZYA4|Q7ZYA4_XENLA	258		0	0	Sf3b1	Sf3b1 protein (Fragment) OS=Xenopus laevis GN=Sf3b1 PE=2 SV=1	500	0.5	0	0.5	1	0.5	0	0.25	0.25	1	0	1	0
tr|Q76LD3|Q76LD3_XENLA	262	C	0	2	pold3	DNA polymerase delta p66 subunit OS=Xenopus laevis GN=pold3 PE=2 SV=1	454	0.5	0	1	1	0.5	0	0.25	0.25	1	0	1	0
tr|Q52KS2|Q52KS2_XENLA	262		0	0	POLD3	POLD3 protein (Fragment) OS=Xenopus laevis GN=POLD3 PE=2 SV=1	474	0.5	0	1	1	0.5	0	0.25	0.25	1	0	1	0
tr|Q6DDT8|Q6DDT8_XENLA	262		0	0	POLD3	POLD3 protein (Fragment) OS=Xenopus laevis GN=POLD3 PE=2 SV=1	476	0.5	0	1	1	0.5	0	0.25	0.25	1	0	1	0
tr|Q6DFK4|Q6DFK4_XENLA	274	C	2	0	etaa1	MGC81344 protein OS=Xenopus laevis GN=etaa1 PE=2 SV=1	820	0.5	0	1	1	0.5	0	0.25	0.25	1	0	1	0
tr|Q4V7G6|Q4V7G6_XENLA	289	C	1	0	MGC115729	MGC115729 protein OS=Xenopus laevis GN=MGC115729 PE=2 SV=1	240	0.5	0	0.5	1	0.5	0	0.25	0.25	1	0	1	0
tr|Q2TAF1|Q2TAF1_XENLA	294	C	1	0	thrap3	Thrap3 protein OS=Xenopus laevis GN=thrap3 PE=2 SV=1	918	0.5	0	0.5	1	0.5	0	0.25	0.25	1	0	1	0
tr|Q7ZYR1|Q7ZYR1_XENLA	295	C	1	0	rpl3	Rpl3-prov protein OS=Xenopus laevis GN=rpl3 PE=2 SV=1	403	0.5	0	0.5	1	0.5	0	0.25	0.25	1	0	1	0
tr|Q6NRK6|Q6NRK6_XENLA	300	C	1	0	rev1	DNA repair protein REV1 OS=Xenopus laevis GN=rev1 PE=2 SV=1	1230	0.5	0	0.5	1	0.5	0	0.25	0.25	1	0	1	0
sp|Q5HZP1|RNH2B_XENLA	301	C	2	0	rnaseh2b	Ribonuclease H2 subunit B OS=Xenopus laevis GN=rnaseh2b PE=2 SV=1	306	0.5	0	1	1	0.5	0	0.25	0.25	1	0	1	0
sp|P62155|CALM_XENLA	318	C	0	2	calm1	Calmodulin OS=Xenopus laevis GN=calm1 PE=1 SV=2	149	0.5	1	0.5	0	0.5	1	0.75	0.75	1	0	1	0
tr|Q7SZ95|Q7SZ95_XENLA	318		0	0	Cam	Cam protein (Fragment) OS=Xenopus laevis GN=Cam PE=2 SV=1	143	0.5	1	0.5	0	0.5	1	0.75	0.75	1	0	1	0
tr|A1A5K0|A1A5K0_XENLA	333	C	1	0	ttc7b	LOC100036811 protein OS=Xenopus laevis GN=ttc7b PE=2 SV=1	843	0.5	0	0.5	1	0.5	0	0.25	0.25	1	0	1	0
sp|Q5XH61|BCL7A_XENLA	340	C	0	1	bcl7a	B-cell CLL/lymphoma 7 protein family member A OS=Xenopus laevis GN=bcl7a PE=2 SV=1	231	0.5	0	1	0	0.5	0	0.25	0.25	1	0	1	0
tr|Q0IHC1|Q0IHC1_XENLA	340		0	0	bcl7c	MGC154460 protein OS=Xenopus laevis GN=bcl7c PE=2 SV=1	209	0.5	0	1	0	0.5	0	0.25	0.25	1	0	1	0
tr|Q7ZXW4|Q7ZXW4_XENLA	344	C	1	0	prpf19	Nmp200-prov protein OS=Xenopus laevis GN=prpf19 PE=2 SV=1	504	0.5	0	0.5	1	0.5	0	0.25	0.25	1	0	1	0
sp|Q6GLS8|FRG1_XENLA	346	C	2	0	frg1	Protein FRG1 OS=Xenopus laevis GN=frg1 PE=2 SV=1	210	0.5	0	1	1	0.5	0	0.25	0.25	1	0	1	0
tr|B1WBD6|B1WBD6_XENLA	349	C	1	0	nsmce4a	LOC100158435 protein OS=Xenopus laevis GN=nsmce4a PE=2 SV=1	334	0.5	0	0.5	1	0.5	0	0.25	0.25	1	0	1	0
tr|Q2VPN3|Q2VPN3_XENLA	350	C	0	1	h1fx	H1fx protein OS=Xenopus laevis GN=h1fx PE=2 SV=1	218	0.5	0	1	0	0.5	0	0.25	0.25	1	0	1	0
tr|B4XAK7|B4XAK7_XENLA	350		0	0		Sperm-specific nuclear basic protein 1 OS=Xenopus laevis PE=2 SV=1	192	0.5	0	1	0	0.5	0	0.25	0.25	1	0	1	0
tr|Q8AVL3|Q8AVL3_XENLA	350		0	0		H1fx-prov protein OS=Xenopus laevis PE=2 SV=1	217	0.5	0	1	0	0.5	0	0.25	0.25	1	0	1	0
tr|Q7ZXS2|Q7ZXS2_XENLA	61		0	0	LOC398512	DNA topoisomerase 2 (Fragment) OS=Xenopus laevis GN=LOC398512 PE=2 SV=1	1132	31	31	22	26	29	30	31	29.5	0.951613	-0.0715533	0.204833	0.688601
tr|D2JYR7|D2JYR7_XENLA	31	C	58	0	fanci	Fanconi anemia complementation group I transcript variant 1 OS=Xenopus laevis GN=fanci PE=2 SV=1	1337	8	12	10	9	12	7	10	9.5	0.95	-0.0740006	0.890844	0.0501984
sp|P20397|NUCL_XENLA	111	C	10	40	ncl	Nucleolin OS=Xenopus laevis GN=ncl PE=2 SV=3	651	8	8	7	12	8	7	8	7.5	0.9375	-0.0931094	0.5	0.30103
tr|Q8AVE2|Q8AVE2_XENLA	42		0	0	hspa1l	Hsc70 protein OS=Xenopus laevis GN=hspa1l PE=2 SV=1	650	16	16	13	12	17	13	16	15	0.9375	-0.0931094	0.704833	0.151914
tr|Q5U4U8|Q5U4U8_XENLA	81	C	42	0	LOC495429	LOC495429 protein (Fragment) OS=Xenopus laevis GN=LOC495429 PE=2 SV=1	1378	7	8	5	8	8	6	7.5	7	0.933333	-0.0995357	0.711723	0.147689
tr|Q5MMR9|Q5MMR9_XENLA	78	C	0	38		Brg1 OS=Xenopus laevis PE=2 SV=1	1600	7	7	5	6	8	5	7	6.5	0.928571	-0.106915	0.795167	0.0995415
tr|Q4VQ79|Q4VQ79_XENLA	78		0	0	smarca4	Brg1 OS=Xenopus laevis GN=smarca4 PE=2 SV=1	1600	7	7	5	6	8	5	7	6.5	0.928571	-0.106915	0.795167	0.0995415
tr|Q6INT0|Q6INT0_XENLA	61	C	33	169	top2a	DNA topoisomerase 2 OS=Xenopus laevis GN=top2a PE=2 SV=1	1579	39	37	25	31	36	34	38	35	0.921053	-0.118644	0.16795	0.774821
tr|Q7ZTK6|Q7ZTK6_XENLA	42	C	0	68	hspa8	MGC53952 protein OS=Xenopus laevis GN=hspa8 PE=2 SV=1	646	17	17	13	13	18	13	17	15.5	0.911765	-0.133267	0.655958	0.183124
tr|Q91624|Q91624_XENLA	42		0	0	hsc70.I	Heat shock cognate 70.I OS=Xenopus laevis GN=hsc70.I PE=2 SV=1	645	10	10	9	8	10	8	10	9	0.9	-0.152003	0.5	0.30103
sp|P02827|HSP70_XENLA	42	C	0	24		Heat shock 70 kDa protein OS=Xenopus laevis PE=2 SV=1	647	5	4	4	3	5	3	4.5	4	0.888889	-0.169925	0.711723	0.147689
tr|Q6DCD3|Q6DCD3_XENLA	42		0	0	hsp70	Hsp70 protein OS=Xenopus laevis GN=hsp70 PE=2 SV=1	647	5	4	4	3	5	3	4.5	4	0.888889	-0.169925	0.711723	0.147689
sp|Q91636|KIF2C_XENLA	124	C	26	0	kif2c	Kinesin-like protein KIF2C OS=Xenopus laevis GN=kif2c PE=1 SV=2	730	4	5	4	5	5	3	4.5	4	0.888889	-0.169925	0.711723	0.147689
sp|Q8AVH1|RBBP7_XENLA	104	C	18	7	rbbp7	Histone-binding protein RBBP7 OS=Xenopus laevis GN=rbbp7 PE=2 SV=1	425	3	6	3	5	5	3	4.5	4	0.888889	-0.169925	0.810892	0.0910368
tr|A1L3K5|A1L3K5_XENLA	42		0	0	hspa1b	LOC100037033 protein OS=Xenopus laevis GN=hspa1b PE=2 SV=1	646	15	14	11	10	15	10	14.5	12.5	0.862069	-0.214125	0.568501	0.245269
tr|Q6NRU3|Q6NRU3_XENLA	65	C	20	0	rfc2	MGC81391 protein OS=Xenopus laevis GN=rfc2 PE=2 SV=1	348	4	3	4	3	3	3	3.5	3	0.857143	-0.222392	0.5	0.30103
tr|Q91993|Q91993_XENLA	42		0	0	hsc70.II	Heat shock cognate 70.II OS=Xenopus laevis GN=hsc70.II PE=2 SV=1	647	17	17	13	13	17	12	17	14.5	0.852941	-0.229482	0.5	0.30103
tr|Q7ZY22|Q7ZY22_XENLA	29	C	16	16	smarcc1	Smarcc1 protein OS=Xenopus laevis GN=smarcc1 PE=2 SV=2	1226	8	5	3	5	6	5	6.5	5.5	0.846154	-0.241008	0.62483	0.204238
sp|P53505|ACT5_XENLA	55	C	0	16		Actin, cytoplasmic type 5 OS=Xenopus laevis PE=3 SV=1	376	6	7	5	6	4	7	6.5	5.5	0.846154	-0.241008	0.62483	0.204238
sp|A2BDB0|ACTG_XENLA	55		0	0	actg1	Actin, cytoplasmic 2 OS=Xenopus laevis GN=actg1 PE=2 SV=1	375	6	7	5	6	4	7	6.5	5.5	0.846154	-0.241008	0.62483	0.204238
sp|O93400|ACTB_XENLA	55		0	0	actb	Actin, cytoplasmic 1 OS=Xenopus laevis GN=actb PE=2 SV=1	375	6	7	5	6	4	7	6.5	5.5	0.846154	-0.241008	0.62483	0.204238
sp|P15475|ACTB_XENBO	55		0	0	actb	Actin, cytoplasmic 1 OS=Xenopus borealis GN=actb PE=3 SV=1	376	6	7	5	6	4	7	6.5	5.5	0.846154	-0.241008	0.62483	0.204238
sp|P53506|ACT8_XENLA	55		0	0		Actin, cytoplasmic type 8 OS=Xenopus laevis PE=3 SV=1	376	6	7	5	6	4	7	6.5	5.5	0.846154	-0.241008	0.62483	0.204238
tr|Q32NP0|Q32NP0_XENLA	55		0	0	actg1	MGC131002 protein OS=Xenopus laevis GN=actg1 PE=2 SV=1	376	6	7	5	6	4	7	6.5	5.5	0.846154	-0.241008	0.62483	0.204238
sp|O42227|HDA1B_XENLA	74	C	0	28	hdac1-b	Probable histone deacetylase 1-B OS=Xenopus laevis GN=hdac1-b PE=1 SV=1	480	6	6	2	4	5	5	6	5	0.833333	-0.263034	#DIV/0!	#DIV/0!
tr|Q7ZYT5|Q7ZYT5_XENLA	74		0	0	hdac1	Histone deacetylase OS=Xenopus laevis GN=hdac1 PE=2 SV=1	480	6	6	2	4	5	5	6	5	0.833333	-0.263034	#DIV/0!	#DIV/0!
sp|P06897|H2A1_XENLA	18	C	0	16		Histone H2A type 1 OS=Xenopus laevis PE=1 SV=2	130	3	3	3	2	3	2	3	2.5	0.833333	-0.263034	0.5	0.30103
tr|Q6AZS1|Q6AZS1_XENLA	18		0	0	hist1h2ad	Histone H2A OS=Xenopus laevis GN=hist1h2ad PE=2 SV=1	130	3	3	3	2	3	2	3	2.5	0.833333	-0.263034	0.5	0.30103
sp|Q91883|GRP78_XENLA	42		0	0	hspa5	78 kDa glucose-regulated protein OS=Xenopus laevis GN=hspa5 PE=2 SV=1	658	3	3	3	2	3	2	3	2.5	0.833333	-0.263034	0.5	0.30103
tr|Q6DD68|Q6DD68_XENLA	42		0	0	LOC397850	LOC397850 protein OS=Xenopus laevis GN=LOC397850 PE=2 SV=1	658	3	3	3	2	3	2	3	2.5	0.833333	-0.263034	0.5	0.30103
tr|Q8AVE3|Q8AVE3_XENLA	42		0	0	hspa5	Hspa5 protein OS=Xenopus laevis GN=hspa5 PE=2 SV=1	655	3	3	3	2	3	2	3	2.5	0.833333	-0.263034	0.5	0.30103
tr|Q91688|Q91688_XENLA	42		0	0	BiP/Grp78	Immunoglobulin binding protein OS=Xenopus laevis GN=BiP/Grp78 PE=2 SV=1	658	3	3	3	2	3	2	3	2.5	0.833333	-0.263034	0.5	0.30103
sp|P16878|K2C5_XENLA	107	C	4	7		Keratin, type II cytoskeletal OS=Xenopus laevis PE=2 SV=2	513	2	4	0.5	0	3	2	3	2.5	0.833333	-0.263034	0.711723	0.147689
sp|Q6DE08|AUKBA_XENLA	80	C	1	5	aurkb-a	Aurora kinase B-A OS=Xenopus laevis GN=aurkb-a PE=1 SV=1	361	2	1	0.5	1	0.5	2	1.5	1.25	0.833333	-0.263034	0.810892	0.0910368
tr|Q7ZWN3|Q7ZWN3_XENLA	4	C	21	6	chd4	B230399n07 protein OS=Xenopus laevis GN=chd4 PE=2 SV=1	1893	7	5	3	2	10	0	6	5	0.833333	-0.263034	0.874861	0.0580612
tr|Q5U510|Q5U510_XENLA	49	C	29	5	rpa3	LOC495401 protein OS=Xenopus laevis GN=rpa3 PE=2 SV=1	121	6	5	7	7	5	4	5.5	4.5	0.818182	-0.289507	0.292893	0.533291
tr|B1H1P5|B1H1P5_XENLA	40	C	2	12	LOC100158273	LOC100158273 protein (Fragment) OS=Xenopus laevis GN=LOC100158273 PE=2 SV=1	1115	2	3	3	2	2	2	2.5	2	0.8	-0.321928	0.5	0.30103
tr|Q6B827|Q6B827_XENLA	67		0	0		Histone H4 (Fragment) OS=Xenopus laevis PE=3 SV=1	43	3	2	2	2	2	2	2.5	2	0.8	-0.321928	0.5	0.30103
tr|Q7SYZ5|Q7SYZ5_XENLA	74	C	0	3	Hdac2	Hdac2 protein (Fragment) OS=Xenopus laevis GN=Hdac2 PE=2 SV=1	447	3	2	1	2	2	2	2.5	2	0.8	-0.321928	0.5	0.30103
tr|Q66J55|Q66J55_XENLA	74		0	0	hdac2	Histone deacetylase OS=Xenopus laevis GN=hdac2 PE=2 SV=1	488	3	2	1	2	2	2	2.5	2	0.8	-0.321928	0.5	0.30103
tr|A9JS62|A9JS62_XENLA	159	C	6	0	LOC100127317	LOC100127317 protein (Fragment) OS=Xenopus laevis GN=LOC100127317 PE=2 SV=1	580	0.5	2	2	0	1	1	1.25	1	0.8	-0.321928	0.795167	0.0995415
tr|Q6GMF1|Q6GMF1_XENLA	42		0	0	hspa2	MGC81782 protein OS=Xenopus laevis GN=hspa2 PE=2 SV=1	634	5	4	4	3	5	2	4.5	3.5	0.777778	-0.36257	0.62483	0.204238
tr|Q5BL88|Q5BL88_XENLA	12	C	0	25	XORC1	XORC1 protein OS=Xenopus laevis GN=XORC1 PE=2 SV=1	886	7	5	1	3	5	4	6	4.5	0.75	-0.415037	0.349886	0.456074
tr|P70049|P70049_XENLA	12		0	0	orc1	Origin recognition complex protein 1 OS=Xenopus laevis GN=orc1 PE=2 SV=1	886	7	5	1	3	5	4	6	4.5	0.75	-0.415037	0.349886	0.456074
sp|P06898|H2A2_XENLA	18		0	0		Histone H2A type 2 OS=Xenopus laevis PE=3 SV=3	130	2	2	1	1	2	1	2	1.5	0.75	-0.415037	0.5	0.30103
sp|Q91918|RA51A_XENLA	34	C	9	4	rad51-a	DNA repair protein RAD51 homolog A OS=Xenopus laevis GN=rad51-a PE=2 SV=1	336	2	2	3	3	2	1	2	1.5	0.75	-0.415037	0.5	0.30103
tr|Q6NRQ4|Q6NRQ4_XENLA	40		0	0	LOC431977	LOC431977 protein (Fragment) OS=Xenopus laevis GN=LOC431977 PE=2 SV=1	1078	2	2	3	2	2	1	2	1.5	0.75	-0.415037	0.5	0.30103
sp|Q7ZYS8|RL10A_XENLA	52	C	0	10	rpl10a	60S ribosomal protein L10a OS=Xenopus laevis GN=rpl10a PE=2 SV=1	217	2	2	1	2	2	1	2	1.5	0.75	-0.415037	0.5	0.30103
tr|Q6EE54|Q6EE54_XENLA	52		0	0		Ribosomal protein (Fragment) OS=Xenopus laevis PE=2 SV=1	184	2	2	1	2	2	1	2	1.5	0.75	-0.415037	0.5	0.30103
tr|Q92134|Q92134_XENLA	123		0	0		Xenopus laevis histone gene cluster Xlh1 with genes H3, H4, H2B, H2A and H1B OS=Xenopus laevis PE=4 SV=2	76	2	2	2	3	2	1	2	1.5	0.75	-0.415037	0.5	0.30103
tr|Q92135|Q92135_XENLA	123		0	0		Histone H3 (Fragment) OS=Xenopus laevis PE=4 SV=1	78	2	2	2	3	2	1	2	1.5	0.75	-0.415037	0.5	0.30103
sp|Q4V7H8|BORE2_XENLA	234	C	10	0	cdca9	Borealin-2 OS=Xenopus laevis GN=cdca9 PE=1 SV=1	296	2	2	1	2	2	1	2	1.5	0.75	-0.415037	0.5	0.30103
tr|A2BD79|A2BD79_XENLA	239	C	0	9	LOC733436	LOC733436 protein (Fragment) OS=Xenopus laevis GN=LOC733436 PE=2 SV=1	474	2	2	1	1	2	1	2	1.5	0.75	-0.415037	0.5	0.30103
tr|Q05AV9|Q05AV9_XENLA	239		0	0	LOC733436	LOC733436 protein (Fragment) OS=Xenopus laevis GN=LOC733436 PE=2 SV=1	450	2	2	1	1	2	1	2	1.5	0.75	-0.415037	0.5	0.30103
tr|Q2VPE9|Q2VPE9_XENLA	239		0	0	LOC733436	LOC733436 protein (Fragment) OS=Xenopus laevis GN=LOC733436 PE=2 SV=1	510	2	2	1	1	2	1	2	1.5	0.75	-0.415037	0.5	0.30103
tr|Q6PGT4|Q6PGT4_XENLA	146		0	0	set	MGC64240 protein OS=Xenopus laevis GN=set PE=2 SV=1	278	2	2	0.5	2	1	2	2	1.5	0.75	-0.415037	0.5	0.30103
tr|Q7ZYN9|Q7ZYN9_XENLA	227	C	5	0		MGC53311 protein OS=Xenopus laevis PE=2 SV=1	375	2	2	2	2	1	2	2	1.5	0.75	-0.415037	0.5	0.30103
tr|Q6DDU1|Q6DDU1_XENLA	62		0	0	MGC82172	MGC82172 protein OS=Xenopus laevis GN=MGC82172 PE=2 SV=1	291	1	1	0.5	0	0.5	1	1	0.75	0.75	-0.415037	0.5	0.30103
tr|Q3KPK3|Q3KPK3_XENLA	43		0	0		Uncharacterized protein OS=Xenopus laevis PE=2 SV=1	376	4	3	1	1	3	2	3.5	2.5	0.714286	-0.485427	0.292893	0.533291
tr|Q7ZYI5|Q7ZYI5_XENLA	142	C	15	0	actl6a	Baf53a-pending-prov protein OS=Xenopus laevis GN=actl6a PE=2 SV=1	429	3	4	2	1	3	2	3.5	2.5	0.714286	-0.485427	0.292893	0.533291
tr|Q6AZH8|Q6AZH8_XENLA	42		0	0	hspa1a	Uncharacterized protein OS=Xenopus laevis GN=hspa1a PE=2 SV=1	652	12	10	7	6	9	6	11	7.5	0.681818	-0.552541	0.210165	0.67744
tr|Q6GQH7|Q6GQH7_XENLA	11		0	0		Uncharacterized protein (Fragment) OS=Xenopus laevis PE=2 SV=1	525	5	4	5	3	3	3	4.5	3	0.666667	-0.584963	0.204833	0.688601
sp|Q91695|HDA1A_XENLA	74	C	1	0	hdac1-a	Probable histone deacetylase 1-A OS=Xenopus laevis GN=hdac1-a PE=1 SV=1	480	4	5	1	3	3	3	4.5	3	0.666667	-0.584963	0.204833	0.688601
tr|Q802C4|Q802C4_XENLA	69	C	15	0	brd7	BRD7 protein OS=Xenopus laevis GN=brd7 PE=2 SV=1	638	3	3	3	2	3	1	3	2	0.666667	-0.584963	0.5	0.30103
tr|Q6GPU5|Q6GPU5_XENLA	26	C	13	0	MGC82602	MGC82602 protein OS=Xenopus laevis GN=MGC82602 PE=2 SV=1	142	2	4	2	1	2	2	3	2	0.666667	-0.584963	0.5	0.30103
tr|Q7ZXT1|Q7ZXT1_XENLA	79	C	7	0	LOC398513	LOC398513 protein (Fragment) OS=Xenopus laevis GN=LOC398513 PE=2 SV=1	407	2	1	1	1	1	1	1.5	1	0.666667	-0.584963	0.5	0.30103
tr|Q2TAS5|Q2TAS5_XENLA	83	C	7	0	trim28	MGC130965 protein OS=Xenopus laevis GN=trim28 PE=2 SV=1	677	2	1	1	1	1	1	1.5	1	0.666667	-0.584963	0.5	0.30103
tr|B1H1W4|B1H1W4_XENLA	106	C	8	0	men1	LOC100158320 protein OS=Xenopus laevis GN=men1 PE=2 SV=1	675	1	2	2	1	1	1	1.5	1	0.666667	-0.584963	0.5	0.30103
tr|Q52KD5|Q52KD5_XENLA	137	C	8	0	LOC733229	LOC733229 protein (Fragment) OS=Xenopus laevis GN=LOC733229 PE=2 SV=1	294	2	1	1	2	1	1	1.5	1	0.666667	-0.584963	0.5	0.30103
tr|Q3B8M5|Q3B8M5_XENLA	228	C	0	7	XNop56	XNop56 protein OS=Xenopus laevis GN=XNop56 PE=2 SV=1	529	2	1	1	1	1	1	1.5	1	0.666667	-0.584963	0.5	0.30103
tr|Q4V7X3|Q4V7X3_XENLA	228		0	0	XNop56	XNop56 protein (Fragment) OS=Xenopus laevis GN=XNop56 PE=2 SV=1	510	2	1	1	1	1	1	1.5	1	0.666667	-0.584963	0.5	0.30103
tr|Q90W60|Q90W60_XENLA	228		0	0	nop56	XNop56 protein OS=Xenopus laevis GN=nop56 PE=2 SV=1	532	2	1	1	1	1	1	1.5	1	0.666667	-0.584963	0.5	0.30103
tr|Q6AZV1|Q6AZV1_XENLA	134	C	3	10	hsp90ab1	Hsp90beta OS=Xenopus laevis GN=hsp90ab1 PE=2 SV=1	722	4	2	0.5	3	3	1	3	2	0.666667	-0.584963	0.552786	0.257443
tr|Q6NUC7|Q6NUC7_XENLA	23	C	2	0		Uncharacterized protein OS=Xenopus laevis PE=2 SV=1	196	0.5	1	0.5	0	1	0	0.75	0.5	0.666667	-0.584963	0.711723	0.147689
tr|A0PGA0|A0PGA0_XENLA	60		0	0	edn3	Endothelin-3 OS=Xenopus laevis GN=edn3 PE=2 SV=1	201	0.5	1	0.5	0	1	0	0.75	0.5	0.666667	-0.584963	0.711723	0.147689
tr|Q7ZY06|Q7ZY06_XENLA	136	C	3	0	u2af2	U2af2 protein OS=Xenopus laevis GN=u2af2 PE=2 SV=2	456	0.5	1	1	0	1	0	0.75	0.5	0.666667	-0.584963	0.711723	0.147689
sp|A8DZJ1|BAZ1B_XENLA	177	C	1	3	baz1b	Tyrosine-protein kinase BAZ1B OS=Xenopus laevis GN=baz1b PE=2 SV=2	1441	0.5	1	0.5	2	1	0	0.75	0.5	0.666667	-0.584963	0.711723	0.147689
tr|Q8UVR4|Q8UVR4_XENLA	177		0	0		Williams syndrome transcription factor (Fragment) OS=Xenopus laevis PE=2 SV=1	1079	0.5	1	0.5	1	1	0	0.75	0.5	0.666667	-0.584963	0.711723	0.147689
tr|Q569U5|Q569U5_XENLA	232	C	4	0	LOC733188	LOC733188 protein (Fragment) OS=Xenopus laevis GN=LOC733188 PE=2 SV=1	1143	0.5	1	1	1	1	0	0.75	0.5	0.666667	-0.584963	0.711723	0.147689
sp|Q58EA2|THO4A_XENLA	286	C	3	0	alyref-a	THO complex subunit 4-A OS=Xenopus laevis GN=alyref-a PE=2 SV=1	256	0.5	1	0.5	2	1	0	0.75	0.5	0.666667	-0.584963	0.711723	0.147689
sp|Q6GPW2|SMO2B_XENLA	302		0	0	sumo2-b	Small ubiquitin-related modifier 2-B OS=Xenopus laevis GN=sumo2-b PE=3 SV=1	95	0.5	1	0.5	1	1	0	0.75	0.5	0.666667	-0.584963	0.711723	0.147689
sp|Q7ZTK7|SMO2A_XENLA	302		0	0	sumo2-a	Small ubiquitin-related modifier 2-A OS=Xenopus laevis GN=sumo2-a PE=3 SV=1	95	0.5	1	0.5	1	1	0	0.75	0.5	0.666667	-0.584963	0.711723	0.147689
sp|Q7T0M6|AS1AB_XENLA	321	C	3	0	asf1ab	Histone chaperone asf1a-B OS=Xenopus laevis GN=asf1ab PE=2 SV=1	200	0.5	1	0.5	1	1	0	0.75	0.5	0.666667	-0.584963	0.711723	0.147689
tr|A8QZK6|A8QZK6_XENLA	325	C	0	2	xeco2	XEco2 OS=Xenopus laevis GN=xeco2 PE=2 SV=1	702	0.5	1	0.5	0	1	0	0.75	0.5	0.666667	-0.584963	0.711723	0.147689
tr|Q4KLP7|Q4KLP7_XENLA	325		0	0	esco2	MGC115718 protein OS=Xenopus laevis GN=esco2 PE=2 SV=1	640	0.5	1	0.5	0	1	0	0.75	0.5	0.666667	-0.584963	0.711723	0.147689
sp|Q6GQ82|SNF5_XENLA	43	C	1	14	smarcb1	SWI/SNF-related matrix-associated actin-dependent regulator of chromatin subfamily B member 1 OS=Xenopus laevis GN=smarcb1 PE=2 SV=1	378	5	3	1	1	3	2	4	2.5	0.625	-0.678072	0.349886	0.456074
tr|Q66IP7|Q66IP7_XENLA	210	C	6	6	smarcd2	MGC86299 protein OS=Xenopus laevis GN=smarcd2 PE=2 SV=1	465	2	3	1	3	2	1	2.5	1.5	0.6	-0.736966	0.292893	0.533291
tr|B7ZR97|B7ZR97_XENLA	119	C	0	1	LOC403373	Nibrin OS=Xenopus laevis GN=LOC403373 PE=2 SV=1	762	2	3	2	5	1	2	2.5	1.5	0.6	-0.736966	0.292893	0.533291
tr|B7ZR99|B7ZR99_XENLA	119		0	0	LOC403373	Nibrin OS=Xenopus laevis GN=LOC403373 PE=2 SV=1	762	2	3	2	5	1	2	2.5	1.5	0.6	-0.736966	0.292893	0.533291
tr|Q6EKW1|Q6EKW1_XENLA	119		0	0	NBS1	Nibrin OS=Xenopus laevis GN=NBS1 PE=2 SV=1	763	2	3	2	4	1	2	2.5	1.5	0.6	-0.736966	0.292893	0.533291
tr|Q9PVV6|Q9PVV6_XENLA	146	C	0	10	set	TAF-Ibeta1 OS=Xenopus laevis GN=set PE=2 SV=1	278	3	2	0.5	2	1	2	2.5	1.5	0.6	-0.736966	0.292893	0.533291
tr|Q6INZ4|Q6INZ4_XENLA	146		0	0	MGC64240	MGC64240 protein OS=Xenopus laevis GN=MGC64240 PE=2 SV=1	278	3	2	0.5	2	1	2	2.5	1.5	0.6	-0.736966	0.292893	0.533291
tr|Q9PVV5|Q9PVV5_XENLA	146		0	0		TAF-Ibeta2 OS=Xenopus laevis PE=2 SV=1	278	3	2	0.5	2	1	2	2.5	1.5	0.6	-0.736966	0.292893	0.533291
sp|A2RRX6|NPAT_XENLA	84	C	25	0	npat	Protein NPAT OS=Xenopus laevis GN=npat PE=2 SV=1	1356	7	8	2	0	4	4	7.5	4	0.533333	-0.906891	0.0903345	1.04415
sp|O93377|RBP4A_XENLA	104		0	0	rbbp4-a	Histone-binding protein RBBP4-A OS=Xenopus laevis GN=rbbp4-a PE=1 SV=3	425	2	2	0.5	1	1	1	2	1	0.5	-1	#DIV/0!	#DIV/0!
sp|Q6INH0|RBP4B_XENLA	104		0	0	rbbp4-b	Histone-binding protein RBBP4-B OS=Xenopus laevis GN=rbbp4-b PE=1 SV=3	425	2	2	0.5	1	1	1	2	1	0.5	-1	#DIV/0!	#DIV/0!
tr|Q3KQ13|Q3KQ13_XENLA	246	C	10	0	MGC131121	MGC131121 protein OS=Xenopus laevis GN=MGC131121 PE=2 SV=1	378	2	2	2	2	1	1	2	1	0.5	-1	#DIV/0!	#DIV/0!
tr|Q6GPV9|Q6GPV9_XENLA	134		0	0	hsp90aa1.1	MGC82579 protein OS=Xenopus laevis GN=hsp90aa1.1 PE=2 SV=1	729	2	2	0.5	2	2	0	2	1	0.5	-1	0.5	0.30103
tr|Q6IP16|Q6IP16_XENLA	91	C	4	0	dnttip1	MGC79023 protein OS=Xenopus laevis GN=dnttip1 PE=2 SV=1	309	1	1	0.5	1	1	0	1	0.5	0.5	-1	0.5	0.30103
tr|Q6NRK0|Q6NRK0_XENLA	127	C	4	0	asap2	MGC83760 protein OS=Xenopus laevis GN=asap2 PE=2 SV=1	1029	1	1	0.5	1	1	0	1	0.5	0.5	-1	0.5	0.30103
sp|Q9DED4|CIRBB_XENLA	176	C	5	0	cirbp-b	Cold-inducible RNA-binding protein B OS=Xenopus laevis GN=cirbp-b PE=1 SV=1	166	1	1	1	1	1	0	1	0.5	0.5	-1	0.5	0.30103
tr|Q498G8|Q498G8_XENLA	192	C	0	4		Uncharacterized protein OS=Xenopus laevis PE=2 SV=1	454	1	1	1	0	1	0	1	0.5	0.5	-1	0.5	0.30103
tr|Q6DDF1|Q6DDF1_XENLA	192		0	0	gabpa	Gabpa-prov protein OS=Xenopus laevis GN=gabpa PE=2 SV=1	452	1	1	1	0	1	0	1	0.5	0.5	-1	0.5	0.30103
tr|Q4V7M4|Q4V7M4_XENLA	200	C	2	1	top1.2	MGC115546 protein OS=Xenopus laevis GN=top1.2 PE=2 SV=1	503	1	1	0.5	0	1	0	1	0.5	0.5	-1	0.5	0.30103
sp|Q6NRI8|CENPS_XENLA	279	C	3	0	apitd1	Centromere protein S OS=Xenopus laevis GN=apitd1 PE=2 SV=1	135	1	1	0.5	0	1	0	1	0.5	0.5	-1	0.5	0.30103
tr|A0JMW3|A0JMW3_XENLA	196	C	3	0	ints7	LOC100036786 protein OS=Xenopus laevis GN=ints7 PE=2 SV=1	982	2	0	0.5	0	1	0	1	0.5	0.5	-1	0.711723	0.147689
tr|Q7ZTM1|Q7ZTM1_XENLA	89	C	2	0	ppil2	Ppil2 protein OS=Xenopus laevis GN=ppil2 PE=2 SV=1	521	1	0	0.5	1	0.5	0	0.5	0.25	0.5	-1	0.711723	0.147689
sp|Q6GNJ8|VPS72_XENLA	92	C	1	0	vps72	Vacuolar protein sorting-associated protein 72 homolog OS=Xenopus laevis GN=vps72 PE=2 SV=1	353	1	0	0.5	0	0.5	0	0.5	0.25	0.5	-1	0.711723	0.147689
tr|Q6WSQ3|Q6WSQ3_XENLA	114	C	1	0	pole3	CHRAC17 protein OS=Xenopus laevis GN=pole3 PE=2 SV=1	147	1	0	0.5	0	0.5	0	0.5	0.25	0.5	-1	0.711723	0.147689
tr|A2BDC1|A2BDC1_XENLA	132	C	0	1	LOC494754	LOC494754 protein (Fragment) OS=Xenopus laevis GN=LOC494754 PE=2 SV=1	796	1	0	0.5	0	0.5	0	0.5	0.25	0.5	-1	0.711723	0.147689
tr|B2GTX8|B2GTX8_XENLA	132		0	0	LOC494754	LOC494754 protein OS=Xenopus laevis GN=LOC494754 PE=2 SV=1	774	1	0	0.5	0	0.5	0	0.5	0.25	0.5	-1	0.711723	0.147689
tr|Q2VPI0|Q2VPI0_XENLA	132		0	0	LOC494754	LOC494754 protein (Fragment) OS=Xenopus laevis GN=LOC494754 PE=2 SV=1	796	1	0	0.5	0	0.5	0	0.5	0.25	0.5	-1	0.711723	0.147689
tr|Q4V7Y5|Q4V7Y5_XENLA	132		0	0	LOC494754	LOC494754 protein (Fragment) OS=Xenopus laevis GN=LOC494754 PE=2 SV=1	798	1	0	0.5	0	0.5	0	0.5	0.25	0.5	-1	0.711723	0.147689
tr|Q52L29|Q52L29_XENLA	132		0	0	srrm1	LOC445881 protein OS=Xenopus laevis GN=srrm1 PE=2 SV=1	872	1	0	0.5	0	0.5	0	0.5	0.25	0.5	-1	0.711723	0.147689
tr|Q63ZQ5|Q63ZQ5_XENLA	132		0	0	LOC494754	LOC494754 protein (Fragment) OS=Xenopus laevis GN=LOC494754 PE=2 SV=1	796	1	0	0.5	0	0.5	0	0.5	0.25	0.5	-1	0.711723	0.147689
tr|Q6DD56|Q6DD56_XENLA	132		0	0	LOC445881	LOC445881 protein (Fragment) OS=Xenopus laevis GN=LOC445881 PE=2 SV=1	734	1	0	0.5	0	0.5	0	0.5	0.25	0.5	-1	0.711723	0.147689
tr|A1L3K3|A1L3K3_XENLA	134		0	0	LOC100037031	LOC100037031 protein (Fragment) OS=Xenopus laevis GN=LOC100037031 PE=2 SV=1	269	1	0	0.5	1	0.5	0	0.5	0.25	0.5	-1	0.711723	0.147689
tr|A2VD63|A2VD63_XENLA	134		0	0		Uncharacterized protein OS=Xenopus laevis PE=2 SV=1	805	1	0	0.5	1	0.5	0	0.5	0.25	0.5	-1	0.711723	0.147689
tr|Q6PAE3|Q6PAE3_XENLA	134		0	0	MGC68448	MGC68448 protein OS=Xenopus laevis GN=MGC68448 PE=2 SV=1	805	1	0	0.5	1	0.5	0	0.5	0.25	0.5	-1	0.711723	0.147689
tr|Q7ZTB3|Q7ZTB3_XENLA	134		0	0	hsp90b1	Heat shock protein gp96 OS=Xenopus laevis GN=hsp90b1 PE=2 SV=1	804	1	0	0.5	1	0.5	0	0.5	0.25	0.5	-1	0.711723	0.147689
tr|Q91662|Q91662_XENLA	134		0	0	Hsp90	Heat shock protein 90 (Fragment) OS=Xenopus laevis GN=Hsp90 PE=4 SV=1	102	1	0	0.5	1	0.5	0	0.5	0.25	0.5	-1	0.711723	0.147689
tr|Q641D1|Q641D1_XENLA	149	C	2	0	dmap1	MGC82015 protein OS=Xenopus laevis GN=dmap1 PE=2 SV=1	464	1	0	0.5	1	0.5	0	0.5	0.25	0.5	-1	0.711723	0.147689
tr|B7ZQY0|B7ZQY0_XENLA	150	C	0	1	LOC398655	Velo1 splice variant 1 OS=Xenopus laevis GN=LOC398655 PE=2 SV=1	779	1	0	0.5	0	0.5	0	0.5	0.25	0.5	-1	0.711723	0.147689
tr|Q7T226|Q7T226_XENLA	150		0	0	velo1	Velo1 OS=Xenopus laevis GN=velo1 PE=2 SV=1	779	1	0	0.5	0	0.5	0	0.5	0.25	0.5	-1	0.711723	0.147689
tr|Q6DTN6|Q6DTN6_XENLA	155		0	0	ppia	Peptidyl-prolyl cis-trans isomerase OS=Xenopus laevis GN=ppia PE=2 SV=1	164	1	0	1	0	0.5	0	0.5	0.25	0.5	-1	0.711723	0.147689
tr|Q6NUH4|Q6NUH4_XENLA	155		0	0	CypA	Peptidyl-prolyl cis-trans isomerase (Fragment) OS=Xenopus laevis GN=CypA PE=2 SV=1	192	1	0	1	0	0.5	0	0.5	0.25	0.5	-1	0.711723	0.147689
tr|Q7SZ12|Q7SZ12_XENLA	155		0	0	CypA	Peptidyl-prolyl cis-trans isomerase (Fragment) OS=Xenopus laevis GN=CypA PE=2 SV=1	193	1	0	1	0	0.5	0	0.5	0.25	0.5	-1	0.711723	0.147689
tr|Q50JE6|Q50JE6_XENLA	171	C	0	2	wrnip1	Werner helicase interacting protein 1 OS=Xenopus laevis GN=wrnip1 PE=2 SV=1	572	1	0	0.5	1	0.5	0	0.5	0.25	0.5	-1	0.711723	0.147689
tr|A9ULW2|A9ULW2_XENLA	171		0	0		Uncharacterized protein OS=Xenopus laevis PE=2 SV=1	339	1	0	0.5	1	0.5	0	0.5	0.25	0.5	-1	0.711723	0.147689
tr|Q6GQF0|Q6GQF0_XENLA	172	C	2	0	trafd1	MGC80116 protein OS=Xenopus laevis GN=trafd1 PE=2 SV=1	606	1	0	0.5	1	0.5	0	0.5	0.25	0.5	-1	0.711723	0.147689
tr|Q5XH43|Q5XH43_XENLA	175	C	1	0	srsf12	LOC495068 protein OS=Xenopus laevis GN=srsf12 PE=2 SV=1	251	1	0	0.5	0	0.5	0	0.5	0.25	0.5	-1	0.711723	0.147689
tr|Q5XGV7|Q5XGV7_XENLA	189	C	1	0	ythdc1	LOC495129 protein OS=Xenopus laevis GN=ythdc1 PE=2 SV=1	704	1	0	0.5	0	0.5	0	0.5	0.25	0.5	-1	0.711723	0.147689
sp|Q7T0S2|NUDC1_XENLA	235	C	1	0	nudcd1	NudC domain-containing protein 1 OS=Xenopus laevis GN=nudcd1 PE=2 SV=1	586	1	0	0.5	0	0.5	0	0.5	0.25	0.5	-1	0.711723	0.147689
sp|Q6NUH0|RL31_XENLA	265	C	1	0	rpl31	60S ribosomal protein L31 OS=Xenopus laevis GN=rpl31 PE=2 SV=1	125	1	0	0.5	0	0.5	0	0.5	0.25	0.5	-1	0.711723	0.147689
tr|Q6AZL7|Q6AZL7_XENLA	272	C	2	0	rps26	MGC86356 protein OS=Xenopus laevis GN=rps26 PE=2 SV=1	115	1	0	0.5	1	0.5	0	0.5	0.25	0.5	-1	0.711723	0.147689
tr|Q6NS25|Q6NS25_XENLA	281	C	1	0	ints2	MGC78791 protein OS=Xenopus laevis GN=ints2 PE=2 SV=1	1175	1	0	0.5	0	0.5	0	0.5	0.25	0.5	-1	0.711723	0.147689
sp|Q7T076|LSM11_XENLA	285	C	0	1	lsm11	U7 snRNA-associated Sm-like protein LSm11 OS=Xenopus laevis GN=lsm11 PE=2 SV=1	291	1	0	0.5	0	0.5	0	0.5	0.25	0.5	-1	0.711723	0.147689
tr|A2RV51|A2RV51_XENLA	285		0	0		Uncharacterized protein (Fragment) OS=Xenopus laevis PE=2 SV=1	294	1	0	0.5	0	0.5	0	0.5	0.25	0.5	-1	0.711723	0.147689
tr|Q0IH70|Q0IH70_XENLA	285		0	0	LSM11	LSM11 protein (Fragment) OS=Xenopus laevis GN=LSM11 PE=2 SV=1	297	1	0	0.5	0	0.5	0	0.5	0.25	0.5	-1	0.711723	0.147689
tr|Q3KPW8|Q3KPW8_XENLA	285		0	0	LSM11	LSM11 protein (Fragment) OS=Xenopus laevis GN=LSM11 PE=2 SV=1	292	1	0	0.5	0	0.5	0	0.5	0.25	0.5	-1	0.711723	0.147689
tr|Q6AXA7|Q6AXA7_XENLA	291	C	2	0	prpf6	MGC80263 protein OS=Xenopus laevis GN=prpf6 PE=2 SV=1	948	1	0	0.5	1	0.5	0	0.5	0.25	0.5	-1	0.711723	0.147689
sp|A1L3I5|NSAPC_XENLA	296	C	0	1	nusap1-c	Nucleolar and spindle-associated protein 1-C OS=Xenopus laevis GN=nusap1-c PE=2 SV=2	525	1	0	0.5	0	0.5	0	0.5	0.25	0.5	-1	0.711723	0.147689
sp|Q1W1G1|NSAPA_XENLA	296		0	0	nusap1-a	Nucleolar and spindle-associated protein 1-A OS=Xenopus laevis GN=nusap1-a PE=1 SV=1	525	1	0	0.5	0	0.5	0	0.5	0.25	0.5	-1	0.711723	0.147689
tr|Q2VPG6|Q2VPG6_XENLA	303	C	0	1		Uncharacterized protein OS=Xenopus laevis PE=2 SV=1	671	1	0	0.5	0	0.5	0	0.5	0.25	0.5	-1	0.711723	0.147689
tr|Q2VPI2|Q2VPI2_XENLA	303		0	0	ewsr1	MGC132026 protein OS=Xenopus laevis GN=ewsr1 PE=2 SV=1	667	1	0	0.5	0	0.5	0	0.5	0.25	0.5	-1	0.711723	0.147689
tr|Q4QR27|Q4QR27_XENLA	303		0	0	LOC733270	LOC733270 protein (Fragment) OS=Xenopus laevis GN=LOC733270 PE=2 SV=1	666	1	0	0.5	0	0.5	0	0.5	0.25	0.5	-1	0.711723	0.147689
tr|Q90WJ2|Q90WJ2_XENLA	310	C	1	0	gnrhr	Gonadotropin-releasing hormone receptor type II OS=Xenopus laevis GN=gnrhr PE=2 SV=1	418	1	0	0.5	0	0.5	0	0.5	0.25	0.5	-1	0.711723	0.147689
tr|Q52KX4|Q52KX4_XENLA	317	C	1	0	MGC115008	MGC115008 protein OS=Xenopus laevis GN=MGC115008 PE=2 SV=1	873	1	0	0.5	0	0.5	0	0.5	0.25	0.5	-1	0.711723	0.147689
sp|P28020|CSK21_XENLA	327	C	0	1	csnk2a1	Casein kinase II subunit alpha OS=Xenopus laevis GN=csnk2a1 PE=2 SV=2	392	1	0	0.5	0	0.5	0	0.5	0.25	0.5	-1	0.711723	0.147689
tr|Q6INV5|Q6INV5_XENLA	327		0	0	csnk2a1	Ck2a1 protein OS=Xenopus laevis GN=csnk2a1 PE=2 SV=1	401	1	0	0.5	0	0.5	0	0.5	0.25	0.5	-1	0.711723	0.147689
tr|A0A068EUV4|A0A068EUV4_XENLA	330	C	0	1	slx4	Structure specific endonuclease subunit SLX4 OS=Xenopus laevis GN=slx4 PE=2 SV=1	1777	1	0	0.5	0	0.5	0	0.5	0.25	0.5	-1	0.711723	0.147689
tr|Q6INJ4|Q6INJ4_XENLA	330		0	0	LOC432277	LOC432277 protein (Fragment) OS=Xenopus laevis GN=LOC432277 PE=2 SV=1	1328	1	0	0.5	0	0.5	0	0.5	0.25	0.5	-1	0.711723	0.147689
tr|Q91803|Q91803_XENLA	335	C	1	0	nolc1	Nucleolar phosphoprotein OS=Xenopus laevis GN=nolc1 PE=2 SV=1	990	1	0	0.5	0	0.5	0	0.5	0.25	0.5	-1	0.711723	0.147689
tr|Q7ZY59|Q7ZY59_XENLA	341	C	0	1		Clk2-prov protein OS=Xenopus laevis PE=2 SV=1	491	1	0	0.5	0	0.5	0	0.5	0.25	0.5	-1	0.711723	0.147689
tr|Q3KPX3|Q3KPX3_XENLA	341		0	0	clk2	MGC131228 protein OS=Xenopus laevis GN=clk2 PE=2 SV=1	501	1	0	0.5	0	0.5	0	0.5	0.25	0.5	-1	0.711723	0.147689
sp|P52170|IMA5_XENLA	342	C	0	1	kpna1	Importin subunit alpha-5 OS=Xenopus laevis GN=kpna1 PE=1 SV=2	522	1	0	0.5	0	0.5	0	0.5	0.25	0.5	-1	0.711723	0.147689
tr|Q4QR45|Q4QR45_XENLA	342		0	0	kpna7	Importin subunit alpha OS=Xenopus laevis GN=kpna7 PE=2 SV=1	522	1	0	0.5	0	0.5	0	0.5	0.25	0.5	-1	0.711723	0.147689
tr|Q498J0|Q498J0_XENLA	347	C	0	1	LOC443677	LOC443677 protein (Fragment) OS=Xenopus laevis GN=LOC443677 PE=2 SV=1	491	1	0	0.5	0	0.5	0	0.5	0.25	0.5	-1	0.711723	0.147689
tr|Q6GN99|Q6GN99_XENLA	347		0	0	LOC443677	LOC443677 protein (Fragment) OS=Xenopus laevis GN=LOC443677 PE=2 SV=1	496	1	0	0.5	0	0.5	0	0.5	0.25	0.5	-1	0.711723	0.147689
tr|Q5XGV6|Q5XGV6_XENLA	348	C	1	0	trim24	LOC495130 protein OS=Xenopus laevis GN=trim24 PE=2 SV=1	439	1	0	0.5	0	0.5	0	0.5	0.25	0.5	-1	0.711723	0.147689
sp|Q09003|COIL_XENLA	209	C	8	0	coil	Coilin OS=Xenopus laevis GN=coil PE=2 SV=2	536	3	2	1	0	2	0	2.5	1	0.4	-1.32193	0.349886	0.456074
sp|Q7SZ22|SUMO3_XENLA	302	C	1	3	sumo3	Small ubiquitin-related modifier 3 OS=Xenopus laevis GN=sumo3 PE=3 SV=1	94	0.5	2	0.5	1	1	0	1.25	0.5	0.4	-1.32193	0.503838	0.297709
tr|Q2TAV4|Q2TAV4_XENLA	94	C	7	3	prpf3	LOC443589 protein OS=Xenopus laevis GN=prpf3 PE=2 SV=1	679	5	0	0.5	3	1	1	2.5	1	0.4	-1.32193	0.655958	0.183124
tr|Q4V812|Q4V812_XENLA	119		0	0	LOC403373	LOC403373 protein (Fragment) OS=Xenopus laevis GN=LOC403373 PE=2 SV=1	492	2	2	1	3	0.5	1	2	0.75	0.375	-1.41504	0.125666	0.900782
tr|Q641A9|Q641A9_XENLA	119		0	0	LOC403373	LOC403373 protein (Fragment) OS=Xenopus laevis GN=LOC403373 PE=2 SV=1	555	2	2	1	3	0.5	1	2	0.75	0.375	-1.41504	0.125666	0.900782
tr|Q6AZV6|Q6AZV6_XENLA	186	C	4	3	myst2	Histone acetyltransferase OS=Xenopus laevis GN=myst2 PE=2 SV=1	553	2	2	1	1	0.5	1	2	0.75	0.375	-1.41504	0.125666	0.900782
sp|Q6GLW1|THO4B_XENLA	286	C	6	1	alyref-b	THO complex subunit 4-B OS=Xenopus laevis GN=alyref-b PE=2 SV=1	256	1	3	1	1	0.5	1	2	0.75	0.375	-1.41504	0.421436	0.375268
tr|I6N3H5|I6N3H5_XENLA	64	C	5	0	Rif1	Rif1 protein OS=Xenopus laevis GN=Rif1 PE=2 SV=1	2327	2	1	0.5	1	1	0	1.5	0.5	0.333333	-1.58496	0.292893	0.533291
tr|Q6INF9|Q6INF9_XENLA	141	C	6	0	gtf2h4	MGC83106 protein OS=Xenopus laevis GN=gtf2h4 PE=2 SV=1	455	2	1	1	1	1	0	1.5	0.5	0.333333	-1.58496	0.292893	0.533291
sp|P15308|B4_XENLA	180	C	0	6	b4	Protein B4 OS=Xenopus laevis GN=b4 PE=1 SV=1	273	1	2	1	1	1	0	1.5	0.5	0.333333	-1.58496	0.292893	0.533291
tr|Q5XHJ2|Q5XHJ2_XENLA	180		0	0	h1foo	B4 protein OS=Xenopus laevis GN=h1foo PE=2 SV=1	283	1	2	1	1	1	0	1.5	0.5	0.333333	-1.58496	0.292893	0.533291
sp|P20911|CDK7_XENLA	298	C	5	0	cdk7	Cyclin-dependent kinase 7 OS=Xenopus laevis GN=cdk7 PE=1 SV=1	352	2	1	0.5	1	1	0	1.5	0.5	0.333333	-1.58496	0.292893	0.533291
tr|A8E601|A8E601_XENLA	299	C	4	0	LOC100126636	LOC100126636 protein (Fragment) OS=Xenopus laevis GN=LOC100126636 PE=2 SV=1	504	2	1	0.5	0	1	0	1.5	0.5	0.333333	-1.58496	0.292893	0.533291
sp|Q6DDV8|TPX2B_XENLA	41	C	1	0	tpx2-b	Targeting protein for Xklp2-B OS=Xenopus laevis GN=tpx2-b PE=2 SV=1	715	0.5	1	1	0	0.5	0	0.75	0.25	0.333333	-1.58496	0.292893	0.533291
sp|P30883|TBB4_XENLA	59	C	0	2	tubb4	Tubulin beta-4 chain OS=Xenopus laevis GN=tubb4 PE=2 SV=1	445	0.5	1	0.5	1	0.5	0	0.75	0.25	0.333333	-1.58496	0.292893	0.533291
tr|Q4KLE9|Q4KLE9_XENLA	59		0	0	LOC446922	LOC446922 protein OS=Xenopus laevis GN=LOC446922 PE=2 SV=1	446	0.5	1	0.5	1	0.5	0	0.75	0.25	0.333333	-1.58496	0.292893	0.533291
tr|Q66KS4|Q66KS4_XENLA	59		0	0	LOC446922	LOC446922 protein (Fragment) OS=Xenopus laevis GN=LOC446922 PE=2 SV=1	448	0.5	1	0.5	1	0.5	0	0.75	0.25	0.333333	-1.58496	0.292893	0.533291
tr|Q7ZWP4|Q7ZWP4_XENLA	59		0	0	tubb4a	MGC53205 protein OS=Xenopus laevis GN=tubb4a PE=2 SV=1	444	0.5	1	0.5	1	0.5	0	0.75	0.25	0.333333	-1.58496	0.292893	0.533291
tr|Q7ZY50|Q7ZY50_XENLA	59		0	0		MGC53997 protein OS=Xenopus laevis PE=2 SV=1	445	0.5	1	0.5	1	0.5	0	0.75	0.25	0.333333	-1.58496	0.292893	0.533291
tr|Q91831|Q91831_XENLA	133	C	0	1		Alpha-tubulin OS=Xenopus laevis PE=2 SV=1	450	0.5	1	0.5	0	0.5	0	0.75	0.25	0.333333	-1.58496	0.292893	0.533291
tr|Q5U4V6|Q5U4V6_XENLA	133		0	0	LOC397931	LOC397931 protein OS=Xenopus laevis GN=LOC397931 PE=2 SV=1	450	0.5	1	0.5	0	0.5	0	0.75	0.25	0.333333	-1.58496	0.292893	0.533291
tr|Q6NRV3|Q6NRV3_XENLA	133		0	0	tuba1a	MGC81323 protein OS=Xenopus laevis GN=tuba1a PE=2 SV=1	450	0.5	1	0.5	0	0.5	0	0.75	0.25	0.333333	-1.58496	0.292893	0.533291
sp|Q5XGU5|DNJ6B_XENLA	151	C	0	2	dnajb6-b	DnaJ homolog subfamily B member 6-B OS=Xenopus laevis GN=dnajb6-b PE=2 SV=1	245	0.5	1	1	0	0.5	0	0.75	0.25	0.333333	-1.58496	0.292893	0.533291
sp|Q5FWN8|DNJ6A_XENLA	151		0	0	dnajb6-a	DnaJ homolog subfamily B member 6-A OS=Xenopus laevis GN=dnajb6-a PE=2 SV=1	250	0.5	1	1	0	0.5	0	0.75	0.25	0.333333	-1.58496	0.292893	0.533291
sp|Q7ZWS1|DUS3L_XENLA	158	C	3	0	dus3l	tRNA-dihydrouridine(47) synthase [NAD(P)(+)]-like OS=Xenopus laevis GN=dus3l PE=2 SV=1	640	0.5	1	1	1	0.5	0	0.75	0.25	0.333333	-1.58496	0.292893	0.533291
sp|Q52KV5|LEO1_XENLA	182	C	1	0	leo1	RNA polymerase-associated protein LEO1 OS=Xenopus laevis GN=leo1 PE=2 SV=1	703	0.5	1	0.5	0	0.5	0	0.75	0.25	0.333333	-1.58496	0.292893	0.533291
tr|Q6PI76|Q6PI76_XENLA	199	C	1	0	rps14	Rps14-prov protein OS=Xenopus laevis GN=rps14 PE=2 SV=1	151	0.5	1	0.5	0	0.5	0	0.75	0.25	0.333333	-1.58496	0.292893	0.533291
sp|P41512|TOP1_XENLA	200		0	0	top1	DNA topoisomerase 1 OS=Xenopus laevis GN=top1 PE=2 SV=1	829	0.5	1	0.5	0	0.5	0	0.75	0.25	0.333333	-1.58496	0.292893	0.533291
tr|Q08AX4|Q08AX4_XENLA	205	C	0	1	LOC100158394	LOC100158394 protein OS=Xenopus laevis GN=LOC100158394 PE=2 SV=1	555	0.5	1	0.5	0	0.5	0	0.75	0.25	0.333333	-1.58496	0.292893	0.533291
tr|B7ZQE1|B7ZQE1_XENLA	205		0	0	LOC398154	Mi-2 histone deacetylase complex protein 66 OS=Xenopus laevis GN=LOC398154 PE=2 SV=1	420	0.5	1	0.5	0	0.5	0	0.75	0.25	0.333333	-1.58496	0.292893	0.533291
tr|Q9PUM7|Q9PUM7_XENLA	205		0	0	gatad2a	Mi-2 histone deacetylase complex protein 66 OS=Xenopus laevis GN=gatad2a PE=2 SV=1	420	0.5	1	0.5	0	0.5	0	0.75	0.25	0.333333	-1.58496	0.292893	0.533291
tr|Q5EWX9|Q5EWX9_XENLA	206	C	0	1		Nuclear pore protein pom121 OS=Xenopus laevis PE=2 SV=1	1050	0.5	1	0.5	0	0.5	0	0.75	0.25	0.333333	-1.58496	0.292893	0.533291
tr|Q4KLR3|Q4KLR3_XENLA	206		0	0	MGC115599	MGC115599 protein OS=Xenopus laevis GN=MGC115599 PE=2 SV=1	902	0.5	1	0.5	0	0.5	0	0.75	0.25	0.333333	-1.58496	0.292893	0.533291
tr|A1A5J8|A1A5J8_XENLA	210		0	0	smarcd1	Smarcd1 protein OS=Xenopus laevis GN=smarcd1 PE=2 SV=1	507	0.5	1	0.5	1	0.5	0	0.75	0.25	0.333333	-1.58496	0.292893	0.533291
tr|Q505N3|Q505N3_XENLA	210		0	0	Smarcd1	Smarcd1 protein (Fragment) OS=Xenopus laevis GN=Smarcd1 PE=2 SV=1	496	0.5	1	0.5	1	0.5	0	0.75	0.25	0.333333	-1.58496	0.292893	0.533291
tr|Q66J25|Q66J25_XENLA	210		0	0	Smarcd1	Smarcd1 protein (Fragment) OS=Xenopus laevis GN=Smarcd1 PE=2 SV=1	504	0.5	1	0.5	1	0.5	0	0.75	0.25	0.333333	-1.58496	0.292893	0.533291
tr|Q6DCP7|Q6DCP7_XENLA	210		0	0	Smarcd1	Smarcd1 protein (Fragment) OS=Xenopus laevis GN=Smarcd1 PE=2 SV=1	513	0.5	1	0.5	1	0.5	0	0.75	0.25	0.333333	-1.58496	0.292893	0.533291
tr|Q7ZXG1|Q7ZXG1_XENLA	210		0	0	Smarcd1	Smarcd1 protein (Fragment) OS=Xenopus laevis GN=Smarcd1 PE=2 SV=1	481	0.5	1	0.5	1	0.5	0	0.75	0.25	0.333333	-1.58496	0.292893	0.533291
sp|Q68F18|MFN2B_XENLA	219	C	0	1	slc25a28-b	Mitoferrin-2B OS=Xenopus laevis GN=slc25a28-b PE=2 SV=1	186	0.5	1	0.5	0	0.5	0	0.75	0.25	0.333333	-1.58496	0.292893	0.533291
sp|Q6GLJ0|MFN2A_XENLA	219		0	0	slc25a28-a	Mitoferrin-2A OS=Xenopus laevis GN=slc25a28-a PE=2 SV=1	186	0.5	1	0.5	0	0.5	0	0.75	0.25	0.333333	-1.58496	0.292893	0.533291
tr|P70020|P70020_XENLA	220	C	1	0		Olfactory receptor (Fragment) OS=Xenopus laevis PE=3 SV=1	222	0.5	1	0.5	0	0.5	0	0.75	0.25	0.333333	-1.58496	0.292893	0.533291
tr|Q08B65|Q08B65_XENLA	251	C	1	0	tfdp2	LOC100158337 protein OS=Xenopus laevis GN=tfdp2 PE=2 SV=1	376	0.5	1	0.5	0	0.5	0	0.75	0.25	0.333333	-1.58496	0.292893	0.533291
tr|Q6GPS0|Q6GPS0_XENLA	252	C	1	0	mdn1	MGC82653 protein OS=Xenopus laevis GN=mdn1 PE=2 SV=1	374	0.5	1	0.5	0	0.5	0	0.75	0.25	0.333333	-1.58496	0.292893	0.533291
tr|D0VEW8|D0VEW8_XENLA	267	C	3	0	rev3l	DNA polymerase OS=Xenopus laevis GN=rev3l PE=2 SV=1	3139	0.5	1	1	1	0.5	0	0.75	0.25	0.333333	-1.58496	0.292893	0.533291
sp|P47830|RL27A_XENLA	273	C	0	1	rpl27a	60S ribosomal protein L27a OS=Xenopus laevis GN=rpl27a PE=2 SV=2	148	0.5	1	0.5	0	0.5	0	0.75	0.25	0.333333	-1.58496	0.292893	0.533291
tr|Q7SZB2|Q7SZB2_XENLA	273		0	0	rpl27a	Rpl27a protein OS=Xenopus laevis GN=rpl27a PE=2 SV=1	148	0.5	1	0.5	0	0.5	0	0.75	0.25	0.333333	-1.58496	0.292893	0.533291
sp|Q8JHV9|BIR7A_XENLA	293	C	1	3	birc7-a	Baculoviral IAP repeat-containing protein 7-A OS=Xenopus laevis GN=birc7-a PE=1 SV=1	401	0.5	1	1	2	0.5	0	0.75	0.25	0.333333	-1.58496	0.292893	0.533291
sp|A9ULZ2|BIR7B_XENLA	293		0	0	birc7-b	Baculoviral IAP repeat-containing protein 7-B OS=Xenopus laevis GN=birc7-b PE=2 SV=2	345	0.5	1	1	1	0.5	0	0.75	0.25	0.333333	-1.58496	0.292893	0.533291
tr|Q7SZF6|Q7SZF6_XENLA	297	C	1	0	vtgb1	Vitellogenin B1 OS=Xenopus laevis GN=vtgb1 PE=2 SV=1	1817	0.5	1	0.5	0	0.5	0	0.75	0.25	0.333333	-1.58496	0.292893	0.533291
tr|Q4QR17|Q4QR17_XENLA	315	C	1	0	MGC114939	MGC114939 protein OS=Xenopus laevis GN=MGC114939 PE=2 SV=1	369	0.5	1	0.5	0	0.5	0	0.75	0.25	0.333333	-1.58496	0.292893	0.533291
sp|Q7ZX03|FOXK2_XENLA	316	C	1	0	foxk2	Forkhead box protein K2 OS=Xenopus laevis GN=foxk2 PE=2 SV=2	642	0.5	1	0.5	0	0.5	0	0.75	0.25	0.333333	-1.58496	0.292893	0.533291
sp|D3IUT5|TICRR_XENLA	331	C	1	0	ticrr	Treslin OS=Xenopus laevis GN=ticrr PE=1 SV=1	1985	0.5	1	0.5	0	0.5	0	0.75	0.25	0.333333	-1.58496	0.292893	0.533291
sp|P51951|MAT1_XENLA	332	C	1	0	mnat1	CDK-activating kinase assembly factor MAT1 OS=Xenopus laevis GN=mnat1 PE=2 SV=1	309	0.5	1	0.5	0	0.5	0	0.75	0.25	0.333333	-1.58496	0.292893	0.533291
tr|Q7ZTM8|Q7ZTM8_XENLA	343	C	0	1	LOC398448	LOC398448 protein (Fragment) OS=Xenopus laevis GN=LOC398448 PE=2 SV=1	306	0.5	1	0.5	0	0.5	0	0.75	0.25	0.333333	-1.58496	0.292893	0.533291
tr|Q2VPF1|Q2VPF1_XENLA	343		0	0	tra2b	LOC398448 protein OS=Xenopus laevis GN=tra2b PE=2 SV=1	298	0.5	1	0.5	0	0.5	0	0.75	0.25	0.333333	-1.58496	0.292893	0.533291
tr|Q6GPZ8|Q6GPZ8_XENLA	343		0	0	LOC443599	LOC443599 protein (Fragment) OS=Xenopus laevis GN=LOC443599 PE=2 SV=1	304	0.5	1	0.5	0	0.5	0	0.75	0.25	0.333333	-1.58496	0.292893	0.533291
sp|Q4FZQ6|PR38A_XENLA	345	C	0	1	prpf38a	Pre-mRNA-splicing factor 38A OS=Xenopus laevis GN=prpf38a PE=2 SV=1	312	0.5	1	0.5	0	0.5	0	0.75	0.25	0.333333	-1.58496	0.292893	0.533291
tr|Q6IP13|Q6IP13_XENLA	345		0	0	LOC432312	LOC432312 protein (Fragment) OS=Xenopus laevis GN=LOC432312 PE=2 SV=1	293	0.5	1	0.5	0	0.5	0	0.75	0.25	0.333333	-1.58496	0.292893	0.533291
tr|Q6DD16|Q6DD16_XENLA	25	C	2	13	rbm39	Rnpc2-prov protein OS=Xenopus laevis GN=rbm39 PE=2 SV=1	540	3	0	5	6	1	0	1.5	0.5	0.333333	-1.58496	0.62483	0.204238
tr|Q6DJM9|Q6DJM9_XENLA	25		0	0	MGC81970	MGC81970 protein OS=Xenopus laevis GN=MGC81970 PE=2 SV=1	512	3	0	4	5	1	0	1.5	0.5	0.333333	-1.58496	0.62483	0.204238
tr|Q4V7T0|Q4V7T0_XENLA	82	C	0	6	Mta2	Mta2 protein OS=Xenopus laevis GN=Mta2 PE=2 SV=1	669	2	2	0.5	1	1	0	2	0.5	0.25	-2	0.204833	0.688601
tr|Q6AZP0|Q6AZP0_XENLA	82		0	0	MGC83056	MGC83056 protein OS=Xenopus laevis GN=MGC83056 PE=2 SV=1	672	2	2	0.5	1	1	0	2	0.5	0.25	-2	0.204833	0.688601
tr|Q9PUN0|Q9PUN0_XENLA	82		0	0	mta2	Metastasis associated 1-like protein OS=Xenopus laevis GN=mta2 PE=2 SV=1	670	2	2	0.5	1	1	0	2	0.5	0.25	-2	0.204833	0.688601
sp|Q91431|NF7O_XENLA	57	C	0	6		Nuclear factor 7, ovary OS=Xenopus laevis PE=2 SV=1	610	1	1	1	3	0.5	0	1	0.25	0.25	-2	0.204833	0.688601
sp|Q92021|NF7B_XENLA	57		0	0		Nuclear factor 7, brain OS=Xenopus laevis PE=1 SV=1	609	1	1	1	2	0.5	0	1	0.25	0.25	-2	0.204833	0.688601
tr|A3KMT7|A3KMT7_XENLA	57		0	0	xnf7	Xnf7 protein (Fragment) OS=Xenopus laevis GN=xnf7 PE=2 SV=1	588	1	1	1	2	0.5	0	1	0.25	0.25	-2	0.204833	0.688601
Ú	57		0	0	xnf7	Xnf7 protein OS=Xenopus laevis GN=xnf7 PE=2 SV=1	609	1	1	1	3	0.5	0	1	0.25	0.25	-2	0.204833	0.688601
tr|Q7SZT0|Q7SZT0_XENLA	147	C	0	2	eaf2	ELL associated factor 2 OS=Xenopus laevis GN=eaf2 PE=2 SV=1	250	1	1	0.5	0	0.5	0	1	0.25	0.25	-2	0.204833	0.688601
tr|Q6PAG5|Q6PAG5_XENLA	147		0	0	eaf2	MGC68453 protein OS=Xenopus laevis GN=eaf2 PE=2 SV=1	251	1	1	0.5	0	0.5	0	1	0.25	0.25	-2	0.204833	0.688601
sp|Q283Q6|DBF4B_XENLA	170	C	0	3	dbf4b	Protein DBF4 homolog B OS=Xenopus laevis GN=dbf4b PE=1 SV=1	784	1	1	0.5	1	0.5	0	1	0.25	0.25	-2	0.204833	0.688601
tr|B3DLM6|B3DLM6_XENLA	170		0	0	dbf4	Dbf4 protein OS=Xenopus laevis GN=dbf4 PE=2 SV=1	784	1	1	0.5	1	0.5	0	1	0.25	0.25	-2	0.204833	0.688601
tr|Q6GPW8|Q6GPW8_XENLA	186		0	0	kat7	Histone acetyltransferase OS=Xenopus laevis GN=kat7 PE=2 SV=1	617	1	1	0.5	1	0.5	0	1	0.25	0.25	-2	0.204833	0.688601
tr|Q6PCK3|Q6PCK3_XENLA	186		0	0		Histone acetyltransferase OS=Xenopus laevis PE=2 SV=1	535	1	1	0.5	1	0.5	0	1	0.25	0.25	-2	0.204833	0.688601
sp|P55863|SOX3A_XENLA	240	C	2	0	sox3-a	Transcription factor Sox-3-A OS=Xenopus laevis GN=sox3-a PE=1 SV=1	309	1	1	0.5	0	0.5	0	1	0.25	0.25	-2	0.204833	0.688601
tr|A0AUU1|A0AUU1_XENLA	242	C	2	0	mlh1	LOC100036779 protein OS=Xenopus laevis GN=mlh1 PE=2 SV=1	750	1	1	0.5	0	0.5	0	1	0.25	0.25	-2	0.204833	0.688601
tr|Q6DKB4|Q6DKB4_XENLA	243	C	0	3	MGC84691	MGC84691 protein OS=Xenopus laevis GN=MGC84691 PE=2 SV=1	536	1	1	0.5	1	0.5	0	1	0.25	0.25	-2	0.204833	0.688601
tr|Q7ZXQ2|Q7ZXQ2_XENLA	243		0	0	fus	Fus protein OS=Xenopus laevis GN=fus PE=2 SV=1	536	1	1	0.5	1	0.5	0	1	0.25	0.25	-2	0.204833	0.688601
tr|Q2KHP5|Q2KHP5_XENLA	244	C	2	0		Uncharacterized protein OS=Xenopus laevis PE=2 SV=1	391	1	1	0.5	0	0.5	0	1	0.25	0.25	-2	0.204833	0.688601
tr|Q5U248|Q5U248_XENLA	263	C	0	2	crebbp	LOC495689 protein OS=Xenopus laevis GN=crebbp PE=2 SV=1	2428	1	1	0.5	0	0.5	0	1	0.25	0.25	-2	0.204833	0.688601
tr|Q7ZXN6|Q7ZXN6_XENLA	263		0	0	crebbp-A	Crebbp-A protein (Fragment) OS=Xenopus laevis GN=crebbp-A PE=2 SV=1	1047	1	1	0.5	0	0.5	0	1	0.25	0.25	-2	0.204833	0.688601
sp|Q6NRW0|MTBP_XENLA	277	C	2	0	mtbp	Mdm2-binding protein OS=Xenopus laevis GN=mtbp PE=2 SV=1	860	1	1	0.5	0	0.5	0	1	0.25	0.25	-2	0.204833	0.688601
sp|Q52KD8|EAF6_XENLA	282	C	2	0	meaf6	Chromatin modification-related protein MEAF6 OS=Xenopus laevis GN=meaf6 PE=2 SV=1	188	1	1	0.5	0	0.5	0	1	0.25	0.25	-2	0.204833	0.688601
tr|Q0VA85|Q0VA85_XENLA	314	C	2	0	mki67	Mki67 protein (Fragment) OS=Xenopus laevis GN=mki67 PE=2 SV=1	2080	1	1	0.5	0	0.5	0	1	0.25	0.25	-2	0.204833	0.688601
tr|Q52L27|Q52L27_XENLA	328	C	2	0	LOC733207	LOC733207 protein (Fragment) OS=Xenopus laevis GN=LOC733207 PE=2 SV=1	1416	1	1	0.5	0	0.5	0	1	0.25	0.25	-2	0.204833	0.688601
tr|A0JMY9|A0JMY9_XENLA	334	C	2	0	hic2	Hic2 protein OS=Xenopus laevis GN=hic2 PE=2 SV=1	458	1	1	0.5	0	0.5	0	1	0.25	0.25	-2	0.204833	0.688601
tr|Q32NM8|Q32NM8_XENLA	337	C	2	0	u2af1	MGC131026 protein OS=Xenopus laevis GN=u2af1 PE=2 SV=1	245	1	1	0.5	0	0.5	0	1	0.25	0.25	-2	0.204833	0.688601
sp|P70062|T7L1A_XENLA	339	C	0	2	tcf7l1-a	Transcription factor 7-like 1-A OS=Xenopus laevis GN=tcf7l1-a PE=1 SV=1	554	1	1	0.5	0	0.5	0	1	0.25	0.25	-2	0.204833	0.688601
sp|P70063|T7L1C_XENLA	339		0	0	tcf7l1-c	Transcription factor 7-like 1-C OS=Xenopus laevis GN=tcf7l1-c PE=2 SV=1	550	1	1	0.5	0	0.5	0	1	0.25	0.25	-2	0.204833	0.688601
sp|P70064|T7L1D_XENLA	339		0	0	tcf7l1-d	Transcription factor 7-like 1-D OS=Xenopus laevis GN=tcf7l1-d PE=2 SV=1	550	1	1	0.5	0	0.5	0	1	0.25	0.25	-2	0.204833	0.688601
sp|Q90ZB6|T7L1B_XENLA	339		0	0	tcf7l1-b	Transcription factor 7-like 1-B OS=Xenopus laevis GN=tcf7l1-b PE=1 SV=1	551	1	1	0.5	0	0.5	0	1	0.25	0.25	-2	0.204833	0.688601
tr|B7ZQ53|B7ZQ53_XENLA	339		0	0	tcf7l1	Transcription factor XTCF-3b OS=Xenopus laevis GN=tcf7l1 PE=2 SV=1	554	1	1	0.5	0	0.5	0	1	0.25	0.25	-2	0.204833	0.688601
tr|Q98997|Q98997_XENLA	339		0	0		Transcription factor XTCF-3b (Fragment) OS=Xenopus laevis PE=2 SV=1	466	1	1	0.5	0	0.5	0	1	0.25	0.25	-2	0.204833	0.688601
tr|Q498E8|Q498E8_XENLA	99	C	8	2	cul4b	MGC115611 protein OS=Xenopus laevis GN=cul4b PE=2 SV=1	858	3	1	2	3	1	0	2	0.5	0.25	-2	0.349886	0.456074
tr|Q6GQ55|Q6GQ55_XENLA	94		0	0	LOC443589	LOC443589 protein (Fragment) OS=Xenopus laevis GN=LOC443589 PE=2 SV=1	444	2	0	0.5	1	0.5	0	1	0.25	0.25	-2	0.588295	0.230405
tr|Q6DE09|Q6DE09_XENLA	161	C	3	0	eif4enif1	Eif4enif1-prov protein OS=Xenopus laevis GN=eif4enif1 PE=2 SV=1	771	2	0	0.5	1	0.5	0	1	0.25	0.25	-2	0.588295	0.230405
tr|Q0P3Q8|Q0P3Q8_XENLA	166		0	0	nop58	MGC78950 protein OS=Xenopus laevis GN=nop58 PE=2 SV=1	534	2	0	3	2	0.5	0	1	0.25	0.25	-2	0.588295	0.230405
tr|Q6DEC4|Q6DEC4_XENLA	166		0	0	MGC78950	MGC78950 protein OS=Xenopus laevis GN=MGC78950 PE=2 SV=1	533	2	0	3	2	0.5	0	1	0.25	0.25	-2	0.588295	0.230405
sp|Q32N93|INCEB_XENLA	198	C	0	1	incenp-b	Inner centromere protein B OS=Xenopus laevis GN=incenp-b PE=2 SV=1	892	2	0	0.5	0	0.5	0	1	0.25	0.25	-2	0.588295	0.230405
tr|Q498L5|Q498L5_XENLA	198		0	0	LOC398822	LOC398822 protein (Fragment) OS=Xenopus laevis GN=LOC398822 PE=2 SV=1	606	2	0	0.5	0	0.5	0	1	0.25	0.25	-2	0.588295	0.230405
tr|Q6GME0|Q6GME0_XENLA	198		0	0	LOC398822	LOC398822 protein (Fragment) OS=Xenopus laevis GN=LOC398822 PE=2 SV=1	540	2	0	0.5	0	0.5	0	1	0.25	0.25	-2	0.588295	0.230405
tr|Q6PAZ7|Q6PAZ7_XENLA	198		0	0	LOC398822	LOC398822 protein (Fragment) OS=Xenopus laevis GN=LOC398822 PE=2 SV=1	613	2	0	0.5	0	0.5	0	1	0.25	0.25	-2	0.588295	0.230405
tr|Q7ZX12|Q7ZX12_XENLA	95	C	4	0	gtf2h1	Gtf2h1-prov protein OS=Xenopus laevis GN=gtf2h1 PE=2 SV=1	532	2	1	0.5	1	0.5	0	1.5	0.25	0.166667	-2.58496	0.198727	0.701742
tr|A1L2X9|A1L2X9_XENLA	163	C	5	0	LOC100036984	LOC100036984 protein (Fragment) OS=Xenopus laevis GN=LOC100036984 PE=2 SV=1	772	2	1	1	1	0.5	0	1.5	0.25	0.166667	-2.58496	0.198727	0.701742
tr|A1L3F1|A1L3F1_XENLA	166	C	0	9	LOC398558	LOC398558 protein (Fragment) OS=Xenopus laevis GN=LOC398558 PE=2 SV=1	488	2	1	3	3	0.5	0	1.5	0.25	0.166667	-2.58496	0.198727	0.701742
tr|Q3B8K0|Q3B8K0_XENLA	166		0	0	LOC398558	LOC398558 protein (Fragment) OS=Xenopus laevis GN=LOC398558 PE=2 SV=1	526	2	1	3	3	0.5	0	1.5	0.25	0.166667	-2.58496	0.198727	0.701742
tr|Q7ZXX3|Q7ZXX3_XENLA	166		0	0	LOC398558	LOC398558 protein (Fragment) OS=Xenopus laevis GN=LOC398558 PE=2 SV=1	489	2	1	3	3	0.5	0	1.5	0.25	0.166667	-2.58496	0.198727	0.701742
tr|C8YR60|C8YR60_XENLA	178	C	3	0	cenpc	Centromere protein C OS=Xenopus laevis GN=cenpc PE=2 SV=1	1400	1	2	0.5	0	0.5	0	1.5	0.25	0.166667	-2.58496	0.198727	0.701742
sp|O13024|INCEA_XENLA	198	C	2	1	incenp-a	Inner centromere protein A OS=Xenopus laevis GN=incenp-a PE=1 SV=1	873	2	1	0.5	0	0.5	0	1.5	0.25	0.166667	-2.58496	0.198727	0.701742
sp|Q6P6Z0|DDB1_XENLA	139	C	15	0	ddb1	DNA damage-binding protein 1 OS=Xenopus laevis GN=ddb1 PE=2 SV=1	1140	4	3	3	4	1	0	3.5	0.5	0.142857	-2.80735	0.0513167	1.28974

## Sheet: rcc vs gap
Protein	Group ID	Collapsed?	Unique Peptides	Razor Peptides	Gene	Description	SeqLen	A1-187	A2-189	B1-195	B2-197	C1-201	C2-203	moyA	moyB	B/A	log2 B/A	p(B/A)	log p(B/A)
sp|Q6DDH2|RMI1_XENLA	93	C	9	0	rmi1	RecQ-mediated genome instability protein 1 OS=Xenopus laevis GN=rmi1 PE=2 SV=1	557	0.5	0	2	3	4	0	0.25	2.5	10	3.32193	0.0917103	1.03758		Sample A: rcc
tr|D2CGM1|D2CGM1_XENLA	153	C	8	0	fancc	Fanconi anemia complementation group C OS=Xenopus laevis GN=fancc PE=2 SV=1	541	0.5	0	2	3	2	1	0.25	2.5	10	3.32193	0.0917103	1.03758		Sample B: gap
tr|Q7ZXV9|Q7ZXV9_XENLA	128	C	7	0	pms1	Pms1 protein OS=Xenopus laevis GN=pms1 PE=2 SV=1	925	0.5	0	3	2	1	1	0.25	2.5	10	3.32193	0.0917103	1.03758		Sample C: cSL
tr|Q6PAX0|Q6PAX0_XENLA	213	C	10	0	brip1	MGC68622 protein OS=Xenopus laevis GN=brip1 PE=2 SV=1	713	0.5	0	2	2	4	2	0.25	2	8	3	0.0903345	1.04415
tr|A0A068ENH4|A0A068ENH4_XENLA	1	C	5	0	FAN1	FANCD2/FANCI-associated nuclease 1 (Fragment) OS=Xenopus laevis GN=FAN1 PE=2 SV=1	1017	0.5	0	2	2	1	0	0.25	2	8	3	0.0903345	1.04415
tr|Q7ZTA5|Q7ZTA5_XENLA	207	C	0	3	rad17	Rad17 OS=Xenopus laevis GN=rad17 PE=2 SV=1	674	0.5	0	0.5	3	0.5	0	0.25	1.75	7	2.80735	0.437078	0.359442
tr|Q6INE0|Q6INE0_XENLA	207		0	0	rad17	Rad17 protein OS=Xenopus laevis GN=rad17 PE=2 SV=1	674	0.5	0	0.5	3	0.5	0	0.25	1.75	7	2.80735	0.437078	0.359442
tr|Q7ZZU6|Q7ZZU6_XENLA	207		0	0	Rad17	RFC-like DNA checkpoint protein Rad17 OS=Xenopus laevis GN=Rad17 PE=2 SV=1	674	0.5	0	0.5	3	0.5	0	0.25	1.75	7	2.80735	0.437078	0.359442
tr|Q8JHD8|Q8JHD8_XENLA	201	C	0	11	Hus1	Checkpoint protein Hus1 OS=Xenopus laevis GN=Hus1 PE=2 SV=1	282	1	0	4	3	2	1	0.5	3.5	7	2.80735	0.0513167	1.28974
tr|Q7ZTA4|Q7ZTA4_XENLA	201		0	0	hus1	Hus1 protein OS=Xenopus laevis GN=hus1 PE=2 SV=1	282	1	0	4	3	2	1	0.5	3.5	7	2.80735	0.0513167	1.28974
tr|Q4FZN2|Q4FZN2_XENLA	193	C	0	4	rnaseh2a	Ribonuclease OS=Xenopus laevis GN=rnaseh2a PE=2 SV=1	302	0.5	0	2	1	1	0	0.25	1.5	6	2.58496	0.198727	0.701742
tr|Q6GNJ4|Q6GNJ4_XENLA	193		0	0	LOC443655	Ribonuclease (Fragment) OS=Xenopus laevis GN=LOC443655 PE=2 SV=1	305	0.5	0	2	1	1	0	0.25	1.5	6	2.58496	0.198727	0.701742
tr|Q5FWN5|Q5FWN5_XENLA	16	C	10	0	msh6	MGC85188 protein OS=Xenopus laevis GN=msh6 PE=2 SV=1	1340	1	0	1	5	3	0	0.5	3	6	2.58496	0.421436	0.375268
tr|Q6GPA9|Q6GPA9_XENLA	110	C	2	0	sf3a1	MGC80562 protein OS=Xenopus laevis GN=sf3a1 PE=2 SV=1	802	0.5	0	0.5	2	0.5	0	0.25	1.25	5	2.32193	0.39587	0.402447
sp|O57683|SF3B1_XENLA	258	C	1	1	sf3b1	Splicing factor 3B subunit 1 OS=Xenopus laevis GN=sf3b1 PE=2 SV=1	1307	0.5	0	0.5	2	0.5	0	0.25	1.25	5	2.32193	0.39587	0.402447
tr|Q6DCZ1|Q6DCZ1_XENLA	86	C	13	0	pola2	DNA polymerase alpha subunit B OS=Xenopus laevis GN=pola2 PE=2 SV=1	598	0.5	1	2	5	3	2	0.75	3.5	4.66667	2.22239	0.31153	0.5065
tr|Q6DDP9|Q6DDP9_XENLA	179	C	1	0	wdhd1	Wdhd1 protein (Fragment) OS=Xenopus laevis GN=wdhd1 PE=2 SV=1	871	1	1	4	5	3	0	1	4.5	4.5	2.16993	0.0903345	1.04415
tr|Q6NU65|Q6NU65_XENLA	17	C	4	0	rnaseh1	Ribonuclease H1 OS=Xenopus laevis GN=rnaseh1 PE=2 SV=1	300	0.5	0	1	1	2	0	0.25	1	4	2	0.204833	0.688601
tr|Q90W61|Q90W61_XENLA	50		0	0	hira	HIRA protein (Fragment) OS=Xenopus laevis GN=hira PE=2 SV=1	28	0.5	0	1	1	2	1	0.25	1	4	2	0.204833	0.688601
sp|Q5BP74|KC1D_XENLA	156	C	0	4	csnk1d	Casein kinase I isoform delta OS=Xenopus laevis GN=csnk1d PE=1 SV=2	415	0.5	0	1	1	2	0	0.25	1	4	2	0.204833	0.688601
tr|Q9PUI2|Q9PUI2_XENLA	156		0	0	csnk1e	CKIe protein OS=Xenopus laevis GN=csnk1e PE=2 SV=1	416	0.5	0	1	1	2	0	0.25	1	4	2	0.204833	0.688601
tr|Q2VPI3|Q2VPI3_XENLA	126		0	0		Uncharacterized protein (Fragment) OS=Xenopus laevis PE=2 SV=1	301	0.5	0	1	1	1	0	0.25	1	4	2	0.204833	0.688601
tr|Q4QQX0|Q4QQX0_XENLA	126		0	0		Uncharacterized protein (Fragment) OS=Xenopus laevis PE=2 SV=1	277	0.5	0	1	1	1	0	0.25	1	4	2	0.204833	0.688601
tr|B7ZSA0|B7ZSA0_XENLA	227		0	0	xak-a	Adult keratin XAK-A OS=Xenopus laevis GN=xak-a PE=2 SV=1	414	0.5	0	1	1	1	1	0.25	1	4	2	0.204833	0.688601
tr|Q98UJ2|Q98UJ2_XENLA	227		0	0	krt24	Adult keratin XAK-A OS=Xenopus laevis GN=krt24 PE=2 SV=1	414	0.5	0	1	1	1	1	0.25	1	4	2	0.204833	0.688601
tr|Q6GPP8|Q6GPP8_XENLA	311	C	4	0	hba-l5	MGC82702 protein OS=Xenopus laevis GN=hba-l5 PE=2 SV=1	139	0.5	0	1	1	1	1	0.25	1	4	2	0.204833	0.688601
tr|A0JMT6|A0JMT6_XENLA	85		0	0	LOC443577	LOC443577 protein (Fragment) OS=Xenopus laevis GN=LOC443577 PE=2 SV=1	930	0.5	0	1	1	0.5	0	0.25	1	4	2	0.204833	0.688601
tr|A1A5K3|A1A5K3_XENLA	85		0	0	chd7	LOC443577 protein OS=Xenopus laevis GN=chd7 PE=2 SV=1	1848	0.5	0	1	1	0.5	0	0.25	1	4	2	0.204833	0.688601
tr|O73623|O73623_XENLA	85		0	0	mespa	Thylacine 1 OS=Xenopus laevis GN=mespa PE=2 SV=1	308	0.5	0	1	1	0.5	0	0.25	1	4	2	0.204833	0.688601
tr|Q2VPG5|Q2VPG5_XENLA	85		0	0	LOC733434	LOC733434 protein (Fragment) OS=Xenopus laevis GN=LOC733434 PE=2 SV=1	873	0.5	0	1	1	0.5	0	0.25	1	4	2	0.204833	0.688601
tr|Q5XGK3|Q5XGK3_XENLA	85		0	0	nhlh1	LOC495280 protein OS=Xenopus laevis GN=nhlh1 PE=2 SV=1	128	0.5	0	1	1	0.5	0	0.25	1	4	2	0.204833	0.688601
tr|Q6DJL9|Q6DJL9_XENLA	85		0	0	MGC82047	MGC82047 protein OS=Xenopus laevis GN=MGC82047 PE=2 SV=1	324	0.5	0	1	1	0.5	0	0.25	1	4	2	0.204833	0.688601
tr|Q9YH15|Q9YH15_XENLA	85		0	0	nhlh1	Transcription factor XHEN1 OS=Xenopus laevis GN=nhlh1 PE=2 SV=1	128	0.5	0	1	1	0.5	0	0.25	1	4	2	0.204833	0.688601
tr|B1H1S6|B1H1S6_XENLA	99		0	0	LOC100158294	LOC100158294 protein (Fragment) OS=Xenopus laevis GN=LOC100158294 PE=2 SV=1	581	0.5	0	1	1	0.5	0	0.25	1	4	2	0.204833	0.688601
tr|W0US81|W0US81_XENLA	221	C	0	2	rad18	E3 ubiquitin ligase (Fragment) OS=Xenopus laevis GN=rad18 PE=2 SV=1	243	0.5	0	1	1	0.5	0	0.25	1	4	2	0.204833	0.688601
tr|W0UQE8|W0UQE8_XENLA	221		0	0	rad18	E3 ubiquitin ligase OS=Xenopus laevis GN=rad18 PE=2 SV=1	492	0.5	0	1	1	0.5	0	0.25	1	4	2	0.204833	0.688601
tr|W0USK2|W0USK2_XENLA	221		0	0	rad18	E3 ubiquitin ligase (Fragment) OS=Xenopus laevis GN=rad18 PE=2 SV=1	250	0.5	0	1	1	0.5	0	0.25	1	4	2	0.204833	0.688601
tr|Q76LD3|Q76LD3_XENLA	262	C	0	2	pold3	DNA polymerase delta p66 subunit OS=Xenopus laevis GN=pold3 PE=2 SV=1	454	0.5	0	1	1	0.5	0	0.25	1	4	2	0.204833	0.688601
tr|Q52KS2|Q52KS2_XENLA	262		0	0	POLD3	POLD3 protein (Fragment) OS=Xenopus laevis GN=POLD3 PE=2 SV=1	474	0.5	0	1	1	0.5	0	0.25	1	4	2	0.204833	0.688601
tr|Q6DDT8|Q6DDT8_XENLA	262		0	0	POLD3	POLD3 protein (Fragment) OS=Xenopus laevis GN=POLD3 PE=2 SV=1	476	0.5	0	1	1	0.5	0	0.25	1	4	2	0.204833	0.688601
tr|Q6DFK4|Q6DFK4_XENLA	274	C	2	0	etaa1	MGC81344 protein OS=Xenopus laevis GN=etaa1 PE=2 SV=1	820	0.5	0	1	1	0.5	0	0.25	1	4	2	0.204833	0.688601
sp|Q5HZP1|RNH2B_XENLA	301	C	2	0	rnaseh2b	Ribonuclease H2 subunit B OS=Xenopus laevis GN=rnaseh2b PE=2 SV=1	306	0.5	0	1	1	0.5	0	0.25	1	4	2	0.204833	0.688601
sp|Q6GLS8|FRG1_XENLA	346	C	2	0	frg1	Protein FRG1 OS=Xenopus laevis GN=frg1 PE=2 SV=1	210	0.5	0	1	1	0.5	0	0.25	1	4	2	0.204833	0.688601
tr|Q6EKW2|Q6EKW2_XENLA	66	C	0	4	RAD26	Rad26 OS=Xenopus laevis GN=RAD26 PE=2 SV=1	798	1	1	2	6	2	1	1	4	4	2	0.374334	0.426741
tr|Q4V7U7|Q4V7U7_XENLA	66		0	0	RAD26	RAD26 protein OS=Xenopus laevis GN=RAD26 PE=2 SV=1	738	1	1	2	6	2	1	1	4	4	2	0.374334	0.426741
sp|O93530|WRN_XENLA	51		0	0	wrn	Werner syndrome ATP-dependent helicase homolog OS=Xenopus laevis GN=wrn PE=2 SV=1	1436	4	4	12	18	17	14	4	15	3.75	1.90689	0.169501	0.770827
tr|Q6DD16|Q6DD16_XENLA	25	C	2	13	rbm39	Rnpc2-prov protein OS=Xenopus laevis GN=rbm39 PE=2 SV=1	540	3	0	5	6	1	0	1.5	5.5	3.66667	1.87447	0.201908	0.694845
sp|P62972|UBIQP_XENLA	148		0	0		Polyubiquitin (Fragment) OS=Xenopus laevis PE=1 SV=2	167	1	0	0.5	3	1	0	0.5	1.75	3.5	1.80735	0.491885	0.308136
tr|Q6GPM6|Q6GPM6_XENLA	51	C	13	69	FFA-1	FFA-1 protein OS=Xenopus laevis GN=FFA-1 PE=2 SV=1	1434	5	6	14	21	19	17	5.5	17.5	3.18182	1.66985	0.17457	0.758029
tr|Q6DFB2|Q6DFB2_XENLA	261	C	3	0	ercc4	Ercc4-prov protein OS=Xenopus laevis GN=ercc4 PE=2 SV=1	897	0.5	0	0.5	1	2	0	0.25	0.75	3	1.58496	0.292893	0.533291
tr|A1L1G8|A1L1G8_XENLA	56	C	2	0	brd3	LOC100036838 protein OS=Xenopus laevis GN=brd3 PE=2 SV=1	783	0.5	0	0.5	1	1	1	0.25	0.75	3	1.58496	0.292893	0.533291
tr|B1WBA5|B1WBA5_XENLA	98	C	0	2	LOC100036795	DNA (cytosine-5)-methyltransferase OS=Xenopus laevis GN=LOC100036795 PE=2 SV=1	1492	0.5	0	0.5	1	1	0	0.25	0.75	3	1.58496	0.292893	0.533291
tr|P79922|P79922_XENLA	98		0	0	dnmt1	DNA (cytosine-5)-methyltransferase OS=Xenopus laevis GN=dnmt1 PE=2 SV=1	1490	0.5	0	0.5	1	1	0	0.25	0.75	3	1.58496	0.292893	0.533291
tr|Q6GQH0|Q6GQH0_XENLA	98		0	0	dnmt1	DNA (cytosine-5)-methyltransferase OS=Xenopus laevis GN=dnmt1 PE=2 SV=1	1490	0.5	0	0.5	1	1	0	0.25	0.75	3	1.58496	0.292893	0.533291
tr|Q9PUD2|Q9PUD2_XENLA	98		0	0		DNA methyltransferase 1 (Fragment) OS=Xenopus laevis PE=2 SV=1	373	0.5	0	0.5	1	1	0	0.25	0.75	3	1.58496	0.292893	0.533291
sp|Q6NRT3|SMU1_XENLA	101	C	2	0	smu1	WD40 repeat-containing protein SMU1 OS=Xenopus laevis GN=smu1 PE=2 SV=1	513	0.5	0	0.5	1	1	0	0.25	0.75	3	1.58496	0.292893	0.533291
tr|Q7SYX0|Q7SYX0_XENLA	102	C	2	0	serpina1	Serpina1d-prov protein OS=Xenopus laevis GN=serpina1 PE=2 SV=1	432	0.5	0	0.5	1	1	0	0.25	0.75	3	1.58496	0.292893	0.533291
sp|Q569M3|CENPA_XENLA	123		0	0	cenpa	Histone H3-like centromeric protein A OS=Xenopus laevis GN=cenpa PE=2 SV=1	150	0.5	0	0.5	1	1	1	0.25	0.75	3	1.58496	0.292893	0.533291
tr|Q6AZV3|Q6AZV3_XENLA	143	C	0	2	rpl17	MGC78885 protein OS=Xenopus laevis GN=rpl17 PE=2 SV=1	184	0.5	0	0.5	1	1	0	0.25	0.75	3	1.58496	0.292893	0.533291
tr|Q7ZY53|Q7ZY53_XENLA	143		0	0	rpl17	RPL17 protein (Fragment) OS=Xenopus laevis GN=rpl17 PE=2 SV=1	187	0.5	0	0.5	1	1	0	0.25	0.75	3	1.58496	0.292893	0.533291
sp|Q7ZXH2|NSE2_XENLA	144	C	2	0	nsmce2	E3 SUMO-protein ligase NSE2 OS=Xenopus laevis GN=nsmce2 PE=2 SV=1	238	0.5	0	0.5	1	1	0	0.25	0.75	3	1.58496	0.292893	0.533291
tr|Q7ZXD0|Q7ZXD0_XENLA	164	C	0	2		MGC53266 protein OS=Xenopus laevis PE=2 SV=1	581	0.5	0	0.5	1	1	0	0.25	0.75	3	1.58496	0.292893	0.533291
tr|Q566I4|Q566I4_XENLA	164		0	0	LOC446268	LOC446268 protein OS=Xenopus laevis GN=LOC446268 PE=2 SV=1	579	0.5	0	0.5	1	1	0	0.25	0.75	3	1.58496	0.292893	0.533291
tr|Q6AX54|Q6AX54_XENLA	164		0	0	LOC446268	LOC446268 protein (Fragment) OS=Xenopus laevis GN=LOC446268 PE=2 SV=1	611	0.5	0	0.5	1	1	0	0.25	0.75	3	1.58496	0.292893	0.533291
tr|Q7ZYE9|Q7ZYE9_XENLA	202	C	1	3	hnrnpab	Hnrpab-prov protein OS=Xenopus laevis GN=hnrnpab PE=1 SV=1	324	0.5	0	0.5	1	1	2	0.25	0.75	3	1.58496	0.292893	0.533291
tr|Q6GM69|Q6GM69_XENLA	202		0	0		Uncharacterized protein OS=Xenopus laevis PE=2 SV=1	326	0.5	0	0.5	1	1	1	0.25	0.75	3	1.58496	0.292893	0.533291
tr|Q98UD3|Q98UD3_XENLA	202		0	0		CArG-binding factor A (Fragment) OS=Xenopus laevis PE=2 SV=1	131	0.5	0	0.5	1	1	1	0.25	0.75	3	1.58496	0.292893	0.533291
tr|Q8JGN6|Q8JGN6_XENLA	260	C	0	3		Protein inhibitor of activated STAT1 OS=Xenopus laevis PE=2 SV=1	649	0.5	0	0.5	1	1	1	0.25	0.75	3	1.58496	0.292893	0.533291
tr|Q5XHH3|Q5XHH3_XENLA	260		0	0	pias1	Pias1-A protein OS=Xenopus laevis GN=pias1 PE=2 SV=1	649	0.5	0	0.5	1	1	1	0.25	0.75	3	1.58496	0.292893	0.533291
tr|Q6GMA8|Q6GMA8_XENLA	260		0	0	pias3	MGC81944 protein OS=Xenopus laevis GN=pias3 PE=2 SV=1	633	0.5	0	0.5	1	1	1	0.25	0.75	3	1.58496	0.292893	0.533291
tr|Q6IRN4|Q6IRN4_XENLA	260		0	0	pias2	MGC83751 protein OS=Xenopus laevis GN=pias2 PE=2 SV=1	584	0.5	0	0.5	1	1	1	0.25	0.75	3	1.58496	0.292893	0.533291
tr|Q6ING8|Q6ING8_XENLA	283	C	2	0	ung	Uracil-DNA glycosylase OS=Xenopus laevis GN=ung PE=2 SV=1	304	0.5	0	0.5	1	1	0	0.25	0.75	3	1.58496	0.292893	0.533291
tr|Q58M12|Q58M12_XENLA	10	C	0	1		DNA polymerase kappa OS=Xenopus laevis PE=2 SV=1	862	0.5	0	0.5	1	0.5	0	0.25	0.75	3	1.58496	0.292893	0.533291
tr|Q6DFE4|Q6DFE4_XENLA	10		0	0	polk	Polk-prov protein OS=Xenopus laevis GN=polk PE=2 SV=1	862	0.5	0	0.5	1	0.5	0	0.25	0.75	3	1.58496	0.292893	0.533291
tr|Q5XH69|Q5XH69_XENLA	47	C	1	0	LOC495053	LOC495053 protein (Fragment) OS=Xenopus laevis GN=LOC495053 PE=2 SV=1	1315	0.5	0	0.5	1	0.5	0	0.25	0.75	3	1.58496	0.292893	0.533291
sp|Q3KPW1|RNP1B_XENLA	77	C	0	1	rnps1-b	RNA-binding protein with serine-rich domain 1-B OS=Xenopus laevis GN=rnps1-b PE=2 SV=1	283	0.5	0	0.5	1	0.5	0	0.25	0.75	3	1.58496	0.292893	0.533291
sp|Q5XG24|RNP1A_XENLA	77		0	0	rnps1-a	RNA-binding protein with serine-rich domain 1-A OS=Xenopus laevis GN=rnps1-a PE=2 SV=1	283	0.5	0	0.5	1	0.5	0	0.25	0.75	3	1.58496	0.292893	0.533291
sp|Q4KLQ5|WDR76_XENLA	129	C	1	0	wdr76	WD repeat-containing protein 76 OS=Xenopus laevis GN=wdr76 PE=2 SV=1	580	0.5	0	0.5	1	0.5	0	0.25	0.75	3	1.58496	0.292893	0.533291
tr|Q66KX3|Q66KX3_XENLA	229	C	1	0	rpl23a	MGC85348 protein OS=Xenopus laevis GN=rpl23a PE=2 SV=1	155	0.5	0	0.5	1	0.5	0	0.25	0.75	3	1.58496	0.292893	0.533291
tr|Q58M11|Q58M11_XENLA	247	C	0	1		DNA polymerase eta OS=Xenopus laevis PE=2 SV=1	684	0.5	0	0.5	1	0.5	0	0.25	0.75	3	1.58496	0.292893	0.533291
tr|Q6DCL9|Q6DCL9_XENLA	247		0	0	polh	Polh-prov protein OS=Xenopus laevis GN=polh PE=2 SV=1	684	0.5	0	0.5	1	0.5	0	0.25	0.75	3	1.58496	0.292893	0.533291
tr|Q4QR12|Q4QR12_XENLA	258		0	0	Sf3b1	Sf3b1 protein OS=Xenopus laevis GN=Sf3b1 PE=2 SV=1	814	0.5	0	0.5	1	0.5	0	0.25	0.75	3	1.58496	0.292893	0.533291
tr|Q7ZYA4|Q7ZYA4_XENLA	258		0	0	Sf3b1	Sf3b1 protein (Fragment) OS=Xenopus laevis GN=Sf3b1 PE=2 SV=1	500	0.5	0	0.5	1	0.5	0	0.25	0.75	3	1.58496	0.292893	0.533291
tr|Q4V7G6|Q4V7G6_XENLA	289	C	1	0	MGC115729	MGC115729 protein OS=Xenopus laevis GN=MGC115729 PE=2 SV=1	240	0.5	0	0.5	1	0.5	0	0.25	0.75	3	1.58496	0.292893	0.533291
tr|Q2TAF1|Q2TAF1_XENLA	294	C	1	0	thrap3	Thrap3 protein OS=Xenopus laevis GN=thrap3 PE=2 SV=1	918	0.5	0	0.5	1	0.5	0	0.25	0.75	3	1.58496	0.292893	0.533291
tr|Q7ZYR1|Q7ZYR1_XENLA	295	C	1	0	rpl3	Rpl3-prov protein OS=Xenopus laevis GN=rpl3 PE=2 SV=1	403	0.5	0	0.5	1	0.5	0	0.25	0.75	3	1.58496	0.292893	0.533291
tr|Q6NRK6|Q6NRK6_XENLA	300	C	1	0	rev1	DNA repair protein REV1 OS=Xenopus laevis GN=rev1 PE=2 SV=1	1230	0.5	0	0.5	1	0.5	0	0.25	0.75	3	1.58496	0.292893	0.533291
tr|A1A5K0|A1A5K0_XENLA	333	C	1	0	ttc7b	LOC100036811 protein OS=Xenopus laevis GN=ttc7b PE=2 SV=1	843	0.5	0	0.5	1	0.5	0	0.25	0.75	3	1.58496	0.292893	0.533291
tr|Q7ZXW4|Q7ZXW4_XENLA	344	C	1	0	prpf19	Nmp200-prov protein OS=Xenopus laevis GN=prpf19 PE=2 SV=1	504	0.5	0	0.5	1	0.5	0	0.25	0.75	3	1.58496	0.292893	0.533291
tr|B1WBD6|B1WBD6_XENLA	349	C	1	0	nsmce4a	LOC100158435 protein OS=Xenopus laevis GN=nsmce4a PE=2 SV=1	334	0.5	0	0.5	1	0.5	0	0.25	0.75	3	1.58496	0.292893	0.533291
sp|O13046|WDHD1_XENLA	179	C	0	26	wdhd1	WD repeat and HMG-box DNA-binding protein 1 OS=Xenopus laevis GN=wdhd1 PE=1 SV=1	1127	3	2	6	9	5	1	2.5	7.5	3	1.58496	0.157758	0.802008
tr|Q2TAV8|Q2TAV8_XENLA	179		0	0	wdhd1	Wdhd1 protein OS=Xenopus laevis GN=wdhd1 PE=2 SV=1	1127	3	2	6	9	5	1	2.5	7.5	3	1.58496	0.157758	0.802008
tr|Q5HZF7|Q5HZF7_XENLA	44	C	15	0	MSH2	MSH2 protein (Fragment) OS=Xenopus laevis GN=MSH2 PE=2 SV=1	676	1	1	2	4	3	4	1	3	3	1.58496	0.295167	0.529932
tr|Q6DJM9|Q6DJM9_XENLA	25		0	0	MGC81970	MGC81970 protein OS=Xenopus laevis GN=MGC81970 PE=2 SV=1	512	3	0	4	5	1	0	1.5	4.5	3	1.58496	0.27259	0.564491
tr|Q7ZZU5|Q7ZZU5_XENLA	33	C	10	0	rad9a	PCNA-like DNA checkpoint protein Rad9 OS=Xenopus laevis GN=rad9a PE=2 SV=1	377	1	1	3	3	1	1	1	3	3	1.58496	#DIV/0!	#DIV/0!
tr|Q5SDB4|Q5SDB4_XENLA	66	C	0	10	atrip	ATR-interacting protein OS=Xenopus laevis GN=atrip PE=2 SV=1	801	1	1	2	4	1	1	1	3	3	1.58496	0.295167	0.529932
tr|B7ZS90|B7ZS90_XENLA	66		0	0		Uncharacterized protein OS=Xenopus laevis PE=2 SV=1	801	1	1	2	4	1	1	1	3	3	1.58496	0.295167	0.529932
tr|B7ZS92|B7ZS92_XENLA	66		0	0	atrip	Atrip protein OS=Xenopus laevis GN=atrip PE=2 SV=1	801	1	1	2	4	1	1	1	3	3	1.58496	0.295167	0.529932
sp|Q498E7|SMAL1_XENLA	113	C	45	4	smarcal1	SWI/SNF-related matrix-associated actin-dependent regulator of chromatin subfamily A-like protein 1 OS=Xenopus laevis GN=smarcal1 PE=2 SV=1	960	4	4	13	10	11	7	4	11.5	2.875	1.52356	0.125666	0.900782
sp|P18248|PCNA_XENLA	9	C	0	23	pcna	Proliferating cell nuclear antigen OS=Xenopus laevis GN=pcna PE=2 SV=1	261	3	1	5	6	4	4	2	5.5	2.75	1.45943	0.129048	0.889249
tr|Q6PF20|Q6PF20_XENLA	9		0	0	pcna	Proliferating cell nuclear antigen OS=Xenopus laevis GN=pcna PE=2 SV=1	261	3	1	5	6	4	4	2	5.5	2.75	1.45943	0.129048	0.889249
tr|Q9I893|Q9I893_XENLA	9		0	0	PCNA	Proliferating cell nuclear antigen OS=Xenopus laevis GN=PCNA PE=2 SV=1	261	3	1	5	6	4	4	2	5.5	2.75	1.45943	0.129048	0.889249
sp|Q5EAW4|MCM10_XENLA	121	C	7	0	mcm10	Protein MCM10 homolog OS=Xenopus laevis GN=mcm10 PE=1 SV=2	860	0.5	1	2	2	1	1	0.75	2	2.66667	1.41504	0.125666	0.900782
tr|Q0P3Q8|Q0P3Q8_XENLA	166		0	0	nop58	MGC78950 protein OS=Xenopus laevis GN=nop58 PE=2 SV=1	534	2	0	3	2	0.5	0	1	2.5	2.5	1.32193	0.349886	0.456074
tr|Q6DEC4|Q6DEC4_XENLA	166		0	0	MGC78950	MGC78950 protein OS=Xenopus laevis GN=MGC78950 PE=2 SV=1	533	2	0	3	2	0.5	0	1	2.5	2.5	1.32193	0.349886	0.456074
tr|Q642R8|Q642R8_XENLA	109	C	0	35	pold1	DNA polymerase OS=Xenopus laevis GN=pold1 PE=2 SV=1	1109	4	3	8	9	7	4	3.5	8.5	2.42857	1.28011	0.0194193	1.71177
tr|D0VEW7|D0VEW7_XENLA	109		0	0	POL3	DNA polymerase OS=Xenopus laevis GN=POL3 PE=2 SV=1	1108	4	3	8	9	7	4	3.5	8.5	2.42857	1.28011	0.0194193	1.71177
sp|Q6P9I7|SMC6_XENLA	100	C	23	0	smc6	Structural maintenance of chromosomes protein 6 OS=Xenopus laevis GN=smc6 PE=2 SV=1	1128	3	2	4	8	4	2	2.5	6	2.4	1.26303	0.317839	0.497793
tr|Q5HZL6|Q5HZL6_XENLA	54	C	29	0	LOC496363	LOC496363 protein (Fragment) OS=Xenopus laevis GN=LOC496363 PE=2 SV=1	517	3	3	8	6	6	3	3	7	2.33333	1.22239	0.155958	0.806992
sp|Q805A1|SMC5_XENLA	35	C	27	0	smc5	Structural maintenance of chromosomes protein 5 OS=Xenopus laevis GN=smc5 PE=2 SV=1	1065	3	3	7	7	4	3	3	7	2.33333	1.22239	#DIV/0!	#DIV/0!
sp|Q6GNV6|COM1_XENLA	14	C	13	0	rbbp8	DNA endonuclease RBBP8 OS=Xenopus laevis GN=rbbp8 PE=1 SV=1	856	2	1	3	4	2	1	1.5	3.5	2.33333	1.22239	0.105573	0.976448
sp|O93610|DPOD2_XENLA	130	C	14	0	pold2	DNA polymerase delta subunit 2 OS=Xenopus laevis GN=pold2 PE=2 SV=1	463	3	0	3	4	2	2	1.5	3.5	2.33333	1.22239	0.39587	0.402447
sp|Q9DEY9|BLM_XENLA	15	C	20	6	blm	Bloom syndrome protein homolog OS=Xenopus laevis GN=blm PE=2 SV=1	1364	2	2	4	5	7	6	2	4.5	2.25	1.16993	0.125666	0.900782
sp|Q9DE46|DPOLA_XENLA	126	C	0	27	pola1	DNA polymerase alpha catalytic subunit OS=Xenopus laevis GN=pola1 PE=1 SV=1	1458	3	3	7	6	5	3	3	6.5	2.16667	1.11548	0.0903345	1.04415
tr|B1WBE2|B1WBE2_XENLA	126		0	0	LOC398200	DNA polymerase OS=Xenopus laevis GN=LOC398200 PE=2 SV=1	1458	3	3	7	6	5	3	3	6.5	2.16667	1.11548	0.0903345	1.04415
tr|B7ZRF3|B7ZRF3_XENLA	126		0	0	LOC398200	DNA polymerase OS=Xenopus laevis GN=LOC398200 PE=2 SV=1	1458	3	3	7	6	5	3	3	6.5	2.16667	1.11548	0.0903345	1.04415
sp|Q6IP18|RFA2A_XENLA	13	C	20	0	rpa2-a	Replication protein A 32 kDa subunit-A OS=Xenopus laevis GN=rpa2-a PE=1 SV=1	276	4	4	9	8	7	5	4	8.5	2.125	1.08746	0.0704466	1.15214
sp|Q9DE14|ATR_XENLA	11	C	88	23	atr	Serine/threonine-protein kinase atr OS=Xenopus laevis GN=atr PE=1 SV=2	2654	14	11	25	26	21	14	12.5	25.5	2.04	1.02857	0.0512637	1.29019
tr|Q6GNJ3|Q6GNJ3_XENLA	192		0	0		Uncharacterized protein (Fragment) OS=Xenopus laevis PE=2 SV=1	299	0.5	0	1	0	1	0	0.25	0.5	2	1	0.711723	0.147689
tr|Q8AY27|Q8AY27_XENLA	259	C	0	2	rad1	Checkpoint protein OS=Xenopus laevis GN=rad1 PE=2 SV=1	281	0.5	0	1	0	1	0	0.25	0.5	2	1	0.711723	0.147689
tr|A5PKS1|A5PKS1_XENLA	259		0	0	Rad1	Checkpoint protein OS=Xenopus laevis GN=Rad1 PE=2 SV=1	281	0.5	0	1	0	1	0	0.25	0.5	2	1	0.711723	0.147689
sp|Q5XH61|BCL7A_XENLA	340	C	0	1	bcl7a	B-cell CLL/lymphoma 7 protein family member A OS=Xenopus laevis GN=bcl7a PE=2 SV=1	231	0.5	0	1	0	0.5	0	0.25	0.5	2	1	0.711723	0.147689
tr|Q0IHC1|Q0IHC1_XENLA	340		0	0	bcl7c	MGC154460 protein OS=Xenopus laevis GN=bcl7c PE=2 SV=1	209	0.5	0	1	0	0.5	0	0.25	0.5	2	1	0.711723	0.147689
tr|Q2VPN3|Q2VPN3_XENLA	350	C	0	1	h1fx	H1fx protein OS=Xenopus laevis GN=h1fx PE=2 SV=1	218	0.5	0	1	0	0.5	0	0.25	0.5	2	1	0.711723	0.147689
tr|B4XAK7|B4XAK7_XENLA	350		0	0		Sperm-specific nuclear basic protein 1 OS=Xenopus laevis PE=2 SV=1	192	0.5	0	1	0	0.5	0	0.25	0.5	2	1	0.711723	0.147689
tr|Q8AVL3|Q8AVL3_XENLA	350		0	0		H1fx-prov protein OS=Xenopus laevis PE=2 SV=1	217	0.5	0	1	0	0.5	0	0.25	0.5	2	1	0.711723	0.147689
tr|Q566G1|Q566G1_XENLA	116		0	0	MGC115350	Poly [ADP-ribose] polymerase OS=Xenopus laevis GN=MGC115350 PE=2 SV=1	493	0.5	1	2	1	1	1	0.75	1.5	2	1	0.349886	0.456074
sp|Q8JHV9|BIR7A_XENLA	293	C	1	3	birc7-a	Baculoviral IAP repeat-containing protein 7-A OS=Xenopus laevis GN=birc7-a PE=1 SV=1	401	0.5	1	1	2	0.5	0	0.75	1.5	2	1	0.349886	0.456074
tr|Q8UVU1|Q8UVU1_XENLA	36		0	0		DNA ligase OS=Xenopus laevis PE=2 SV=1	906	0.5	2	2	3	2	2	1.25	2.5	2	1	0.316379	0.499792
tr|Q4VT49|Q4VT49_XENLA	324	C	11	0	fancl	Fanconi anemia complementation group L OS=Xenopus laevis GN=fancl PE=2 SV=1	372	0.5	2	3	2	2	2	1.25	2.5	2	1	0.316379	0.499792
tr|Q8UVU2|Q8UVU2_XENLA	36	C	0	15	lig3	DNA ligase OS=Xenopus laevis GN=lig3 PE=2 SV=1	988	0.5	3	3	4	3	2	1.75	3.5	2	1	0.376374	0.424381
tr|Q6IRA7|Q6IRA7_XENLA	36		0	0	LOC398275	DNA ligase OS=Xenopus laevis GN=LOC398275 PE=2 SV=1	933	0.5	3	3	4	3	2	1.75	3.5	2	1	0.376374	0.424381
tr|Q6NTQ1|Q6NTQ1_XENLA	135	C	18	0	MGC83104	MGC83104 protein OS=Xenopus laevis GN=MGC83104 PE=2 SV=1	797	2	1	2	4	5	4	1.5	3	2	1	0.349886	0.456074
tr|A1L3F9|A1L3F9_XENLA	38	C	0	14	LOC100036995	LOC100036995 protein (Fragment) OS=Xenopus laevis GN=LOC100036995 PE=2 SV=1	583	2	1	2	4	3	2	1.5	3	2	1	0.349886	0.456074
tr|B1H1N6|B1H1N6_XENLA	38		0	0	LOC100036995	LOC100036995 protein (Fragment) OS=Xenopus laevis GN=LOC100036995 PE=2 SV=1	587	2	1	2	4	3	2	1.5	3	2	1	0.349886	0.456074
sp|P02537|K1C0_XENLA	227	C	0	10		Keratin-3, type I cytoskeletal 51 kDa OS=Xenopus laevis PE=2 SV=1	486	1	1	2	2	2	2	1	2	2	1	#DIV/0!	#DIV/0!
tr|Q6IRP5|Q6IRP5_XENLA	227	C	1	0	krt19	MGC83069 protein OS=Xenopus laevis GN=krt19 PE=2 SV=1	412	1	1	2	2	2	3	1	2	2	1	#DIV/0!	#DIV/0!
tr|A2BDA6|A2BDA6_XENLA	227		0	0	LOC100037084	LOC100037084 protein OS=Xenopus laevis GN=LOC100037084 PE=2 SV=1	423	1	1	2	2	2	2	1	2	2	1	#DIV/0!	#DIV/0!
tr|Q05AX6|Q05AX6_XENLA	227		0	0	krt19	Krt19 protein OS=Xenopus laevis GN=krt19 PE=2 SV=1	443	1	1	2	2	2	2	1	2	2	1	#DIV/0!	#DIV/0!
tr|Q505L4|Q505L4_XENLA	227		0	0	LOC397864	LOC397864 protein OS=Xenopus laevis GN=LOC397864 PE=2 SV=1	483	1	1	2	2	2	2	1	2	2	1	#DIV/0!	#DIV/0!
sp|Q91917|RA51B_XENLA	34		0	0	rad51-b	DNA repair protein RAD51 homolog B OS=Xenopus laevis GN=rad51-b PE=2 SV=1	336	1	0	1	1	1	0	0.5	1	2	1	0.5	0.30103
sp|P70032|PLK1_XENLA	168	C	9	0	plk1	Serine/threonine-protein kinase PLK1 OS=Xenopus laevis GN=plk1 PE=1 SV=1	598	1	1	2	2	1	2	1	2	2	1	#DIV/0!	#DIV/0!
tr|A6H8J3|A6H8J3_XENLA	185	C	0	8	dclre1a	LOC733261 protein OS=Xenopus laevis GN=dclre1a PE=2 SV=1	932	1	1	1	3	1	1	1	2	2	1	0.5	0.30103
tr|Q4V7N1|Q4V7N1_XENLA	185		0	0	LOC733261	LOC733261 protein (Fragment) OS=Xenopus laevis GN=LOC733261 PE=2 SV=1	526	1	1	1	3	1	1	1	2	2	1	0.5	0.30103
sp|Q4KLU2|PRP39_XENLA	275	C	5	0	prpf39	Pre-mRNA-processing factor 39 OS=Xenopus laevis GN=prpf39 PE=2 SV=1	641	1	0	1	1	1	1	0.5	1	2	1	0.5	0.30103
sp|Q91431|NF7O_XENLA	57	C	0	6		Nuclear factor 7, ovary OS=Xenopus laevis PE=2 SV=1	610	1	1	1	3	0.5	0	1	2	2	1	0.5	0.30103
tr|A9JS19|A9JS19_XENLA	57		0	0	xnf7	Xnf7 protein OS=Xenopus laevis GN=xnf7 PE=2 SV=1	609	1	1	1	3	0.5	0	1	2	2	1	0.5	0.30103
tr|A1L3F1|A1L3F1_XENLA	166	C	0	9	LOC398558	LOC398558 protein (Fragment) OS=Xenopus laevis GN=LOC398558 PE=2 SV=1	488	2	1	3	3	0.5	0	1.5	3	2	1	0.204833	0.688601
tr|Q3B8K0|Q3B8K0_XENLA	166		0	0	LOC398558	LOC398558 protein (Fragment) OS=Xenopus laevis GN=LOC398558 PE=2 SV=1	526	2	1	3	3	0.5	0	1.5	3	2	1	0.204833	0.688601
tr|Q7ZXX3|Q7ZXX3_XENLA	166		0	0	LOC398558	LOC398558 protein (Fragment) OS=Xenopus laevis GN=LOC398558 PE=2 SV=1	489	2	1	3	3	0.5	0	1.5	3	2	1	0.204833	0.688601
tr|C4N9Q9|C4N9Q9_XENLA	85	C	13	38	rad50	Rad50 OS=Xenopus laevis GN=rad50 PE=2 SV=1	1312	7	5	10	11	10	8	6	10.5	1.75	0.807355	0.0917103	1.03758
sp|P49393|RS13_XENLA	183	C	0	9	rps13	40S ribosomal protein S13 OS=Xenopus laevis GN=rps13 PE=3 SV=2	151	1	1	0.5	3	2	2	1	1.75	1.75	0.807355	0.655958	0.183124
tr|Q7SZT6|Q7SZT6_XENLA	183		0	0	rps13	Rps13-prov protein OS=Xenopus laevis GN=rps13 PE=2 SV=1	151	1	1	0.5	3	2	2	1	1.75	1.75	0.807355	0.655958	0.183124
sp|A8DZJ1|BAZ1B_XENLA	177	C	1	3	baz1b	Tyrosine-protein kinase BAZ1B OS=Xenopus laevis GN=baz1b PE=2 SV=2	1441	0.5	1	0.5	2	1	0	0.75	1.25	1.66667	0.736966	0.62483	0.204238
sp|Q58EA2|THO4A_XENLA	286	C	3	0	alyref-a	THO complex subunit 4-A OS=Xenopus laevis GN=alyref-a PE=2 SV=1	256	0.5	1	0.5	2	1	0	0.75	1.25	1.66667	0.736966	0.62483	0.204238
tr|Q7ZX79|Q7ZX79_XENLA	73	C	0	16	nono	p54nrb protein OS=Xenopus laevis GN=nono PE=2 SV=1	464	3	0	1	4	5	3	1.5	2.5	1.66667	0.736966	0.683772	0.165089
tr|Q2V0J2|Q2V0J2_XENLA	73		0	0	p54nrb	54 kD nuclear RNA-binding protein OS=Xenopus laevis GN=p54nrb PE=2 SV=1	463	3	0	1	4	5	3	1.5	2.5	1.66667	0.736966	0.683772	0.165089
sp|A1L2H9|RFA2B_XENLA	13	C	6	17	rpa2-b	Replication protein A 32 kDa subunit-B OS=Xenopus laevis GN=rpa2-b PE=2 SV=1	274	3	3	5	5	4	3	3	5	1.66667	0.736966	#DIV/0!	#DIV/0!
tr|Q800A4|Q800A4_XENLA	24	C	15	0	prim1	DNA primase OS=Xenopus laevis GN=prim1 PE=2 SV=1	420	2	1	2	3	4	3	1.5	2.5	1.66667	0.736966	0.292893	0.533291
tr|A0JMV0|A0JMV0_XENLA	148	C	0	11	MGC154789	MGC154789 protein OS=Xenopus laevis GN=MGC154789 PE=2 SV=1	305	2	1	1	4	2	1	1.5	2.5	1.66667	0.736966	0.62483	0.204238
tr|Q6GMC1|Q6GMC1_XENLA	148		0	0	rps27a	MGC81889 protein OS=Xenopus laevis GN=rps27a PE=2 SV=1	156	2	1	1	4	2	1	1.5	2.5	1.66667	0.736966	0.62483	0.204238
tr|Q6GQF3|Q6GQF3_XENLA	148		0	0	uba52	MGC80109 protein OS=Xenopus laevis GN=uba52 PE=2 SV=1	128	2	1	1	4	2	1	1.5	2.5	1.66667	0.736966	0.62483	0.204238
tr|Q7SY79|Q7SY79_XENLA	148		0	0	ubc	Ubc-prov protein OS=Xenopus laevis GN=ubc PE=2 SV=1	609	2	1	1	4	2	1	1.5	2.5	1.66667	0.736966	0.62483	0.204238
tr|Q7ZXG5|Q7ZXG5_XENLA	148		0	0	ubb	MGC53081 protein OS=Xenopus laevis GN=ubb PE=2 SV=1	380	2	1	1	4	2	1	1.5	2.5	1.66667	0.736966	0.62483	0.204238
sp|Q800K6|TOB1A_XENLA	3	C	14	67	topbp1-A	DNA topoisomerase 2-binding protein 1-A OS=Xenopus laevis GN=topbp1-A PE=1 SV=2	1513	14	8	19	17	12	11	11	18	1.63636	0.710493	0.232776	0.633061
tr|D5MDW0|D5MDW0_XENLA	97	C	33	0	fancm	Fanconi anemia protein OS=Xenopus laevis GN=fancm PE=2 SV=1	2166	5	3	6	7	7	5	4	6.5	1.625	0.70044	0.198727	0.701742
sp|P70040|FEN1A_XENLA	223	C	0	9	fen1-a	Flap endonuclease 1-A OS=Xenopus laevis GN=fen1-a PE=1 SV=1	382	0.5	2	1	3	2	1	1.25	2	1.6	0.678072	0.613571	0.212135
sp|P70054|FEN1B_XENLA	223		0	0	fen1-b	Flap endonuclease 1-B OS=Xenopus laevis GN=fen1-b PE=1 SV=1	382	0.5	2	1	3	2	1	1.25	2	1.6	0.678072	0.613571	0.212135
tr|Q4V843|Q4V843_XENLA	85		0	0	LOC495064	LOC495064 protein (Fragment) OS=Xenopus laevis GN=LOC495064 PE=2 SV=1	555	6	3	7	7	7	6	4.5	7	1.55556	0.63743	0.344042	0.463389
tr|Q5XH50|Q5XH50_XENLA	85		0	0	LOC495064	LOC495064 protein (Fragment) OS=Xenopus laevis GN=LOC495064 PE=2 SV=1	724	6	3	7	7	7	6	4.5	7	1.55556	0.63743	0.344042	0.463389
sp|Q7ZZY3|TOB1B_XENLA	3		0	0	topbp1-B	DNA topoisomerase 2-binding protein 1-B OS=Xenopus laevis GN=topbp1-B PE=2 SV=1	1513	12	7	15	14	11	8	9.5	14.5	1.52632	0.610053	0.285636	0.544187
tr|Q4VT51|Q4VT51_XENLA	28	C	27	0	fanca	Fanconi anemia complementation group A OS=Xenopus laevis GN=fanca PE=2 SV=1	1422	3	3	5	4	6	6	3	4.5	1.5	0.584963	0.204833	0.688601
sp|B6CHA3|UHRF1_XENLA	190	C	0	24	uhrf1	E3 ubiquitin-protein ligase UHRF1 OS=Xenopus laevis GN=uhrf1 PE=2 SV=1	772	3	3	5	4	6	3	3	4.5	1.5	0.584963	0.204833	0.688601
tr|Q2TAH0|Q2TAH0_XENLA	190		0	0	LOC432234	LOC432234 protein (Fragment) OS=Xenopus laevis GN=LOC432234 PE=2 SV=1	656	3	3	5	4	6	3	3	4.5	1.5	0.584963	0.204833	0.688601
tr|Q52L17|Q52L17_XENLA	190		0	0	LOC432234	LOC432234 protein (Fragment) OS=Xenopus laevis GN=LOC432234 PE=2 SV=1	598	3	3	5	4	6	3	3	4.5	1.5	0.584963	0.204833	0.688601
tr|Q6IP39|Q6IP39_XENLA	190		0	0	LOC432234	LOC432234 protein (Fragment) OS=Xenopus laevis GN=LOC432234 PE=2 SV=1	597	3	3	5	4	6	3	3	4.5	1.5	0.584963	0.204833	0.688601
tr|Q92132|Q92132_XENLA	123		0	0	H3r	Histone H3 OS=Xenopus laevis GN=H3r PE=3 SV=1	136	2	2	2	4	3	2	2	3	1.5	0.584963	0.5	0.30103
tr|Q6NTX9|Q6NTX9_XENLA	145	C	17	0	sub1	MGC81442 protein OS=Xenopus laevis GN=sub1 PE=2 SV=1	128	3	1	3	3	3	4	2	3	1.5	0.584963	0.5	0.30103
sp|Q91918|RA51A_XENLA	34	C	9	4	rad51-a	DNA repair protein RAD51 homolog A OS=Xenopus laevis GN=rad51-a PE=2 SV=1	336	2	2	3	3	2	1	2	3	1.5	0.584963	#DIV/0!	#DIV/0!
sp|Q8QHA5|DNA2_XENLA	108	C	7	0	dna2	DNA replication ATP-dependent helicase/nuclease DNA2 OS=Xenopus laevis GN=dna2 PE=1 SV=1	1053	1	1	1	2	1	1	1	1.5	1.5	0.584963	0.5	0.30103
sp|Q92021|NF7B_XENLA	57		0	0		Nuclear factor 7, brain OS=Xenopus laevis PE=1 SV=1	609	1	1	1	2	0.5	0	1	1.5	1.5	0.584963	0.5	0.30103
tr|A3KMT7|A3KMT7_XENLA	57		0	0	xnf7	Xnf7 protein (Fragment) OS=Xenopus laevis GN=xnf7 PE=2 SV=1	588	1	1	1	2	0.5	0	1	1.5	1.5	0.584963	0.5	0.30103
tr|B1WBC6|B1WBC6_XENLA	174	C	3	0	atad2b	LOC100158428 protein OS=Xenopus laevis GN=atad2b PE=2 SV=1	872	1	0	0.5	1	1	0	0.5	0.75	1.5	0.584963	0.711723	0.147689
tr|Q8AY70|Q8AY70_XENLA	323	C	3	0	gapdh	Glyceraldehyde-3-phosphate dehydrogenase OS=Xenopus laevis GN=gapdh PE=2 SV=1	333	1	0	0.5	1	1	0	0.5	0.75	1.5	0.584963	0.711723	0.147689
sp|P25183|RCC1_XENLA	336	C	0	3	rcc1	Regulator of chromosome condensation OS=Xenopus laevis GN=rcc1 PE=2 SV=1	424	1	0	0.5	1	1	0	0.5	0.75	1.5	0.584963	0.711723	0.147689
tr|Q08B75|Q08B75_XENLA	336		0	0	chc1-a	Chc1-a protein OS=Xenopus laevis GN=chc1-a PE=2 SV=1	420	1	0	0.5	1	1	0	0.5	0.75	1.5	0.584963	0.711723	0.147689
tr|Q32N89|Q32N89_XENLA	336		0	0	rcc1	Chc1-b protein OS=Xenopus laevis GN=rcc1 PE=2 SV=1	420	1	0	0.5	1	1	0	0.5	0.75	1.5	0.584963	0.711723	0.147689
tr|Q6IP87|Q6IP87_XENLA	336		0	0	chc1-b-prov	Chc1-b-prov protein OS=Xenopus laevis GN=chc1-b-prov PE=2 SV=1	420	1	0	0.5	1	1	0	0.5	0.75	1.5	0.584963	0.711723	0.147689
tr|Q6IRM1|Q6IRM1_XENLA	336		0	0	chc1-a-prov	Chc1-a-prov protein (Fragment) OS=Xenopus laevis GN=chc1-a-prov PE=2 SV=1	417	1	0	0.5	1	1	0	0.5	0.75	1.5	0.584963	0.711723	0.147689
tr|Q5PPZ3|Q5PPZ3_XENLA	30	C	3	0	LOC496036	LOC496036 protein OS=Xenopus laevis GN=LOC496036 PE=2 SV=1	217	1	0	0.5	1	0.5	1	0.5	0.75	1.5	0.584963	0.711723	0.147689
tr|Q7ZTM1|Q7ZTM1_XENLA	89	C	2	0	ppil2	Ppil2 protein OS=Xenopus laevis GN=ppil2 PE=2 SV=1	521	1	0	0.5	1	0.5	0	0.5	0.75	1.5	0.584963	0.711723	0.147689
tr|A1L3K3|A1L3K3_XENLA	134		0	0	LOC100037031	LOC100037031 protein (Fragment) OS=Xenopus laevis GN=LOC100037031 PE=2 SV=1	269	1	0	0.5	1	0.5	0	0.5	0.75	1.5	0.584963	0.711723	0.147689
tr|A2VD63|A2VD63_XENLA	134		0	0		Uncharacterized protein OS=Xenopus laevis PE=2 SV=1	805	1	0	0.5	1	0.5	0	0.5	0.75	1.5	0.584963	0.711723	0.147689
tr|Q6PAE3|Q6PAE3_XENLA	134		0	0	MGC68448	MGC68448 protein OS=Xenopus laevis GN=MGC68448 PE=2 SV=1	805	1	0	0.5	1	0.5	0	0.5	0.75	1.5	0.584963	0.711723	0.147689
tr|Q7ZTB3|Q7ZTB3_XENLA	134		0	0	hsp90b1	Heat shock protein gp96 OS=Xenopus laevis GN=hsp90b1 PE=2 SV=1	804	1	0	0.5	1	0.5	0	0.5	0.75	1.5	0.584963	0.711723	0.147689
tr|Q91662|Q91662_XENLA	134		0	0	Hsp90	Heat shock protein 90 (Fragment) OS=Xenopus laevis GN=Hsp90 PE=4 SV=1	102	1	0	0.5	1	0.5	0	0.5	0.75	1.5	0.584963	0.711723	0.147689
tr|Q641D1|Q641D1_XENLA	149	C	2	0	dmap1	MGC82015 protein OS=Xenopus laevis GN=dmap1 PE=2 SV=1	464	1	0	0.5	1	0.5	0	0.5	0.75	1.5	0.584963	0.711723	0.147689
tr|Q50JE6|Q50JE6_XENLA	171	C	0	2	wrnip1	Werner helicase interacting protein 1 OS=Xenopus laevis GN=wrnip1 PE=2 SV=1	572	1	0	0.5	1	0.5	0	0.5	0.75	1.5	0.584963	0.711723	0.147689
tr|A9ULW2|A9ULW2_XENLA	171		0	0		Uncharacterized protein OS=Xenopus laevis PE=2 SV=1	339	1	0	0.5	1	0.5	0	0.5	0.75	1.5	0.584963	0.711723	0.147689
tr|Q6GQF0|Q6GQF0_XENLA	172	C	2	0	trafd1	MGC80116 protein OS=Xenopus laevis GN=trafd1 PE=2 SV=1	606	1	0	0.5	1	0.5	0	0.5	0.75	1.5	0.584963	0.711723	0.147689
tr|Q6AZL7|Q6AZL7_XENLA	272	C	2	0	rps26	MGC86356 protein OS=Xenopus laevis GN=rps26 PE=2 SV=1	115	1	0	0.5	1	0.5	0	0.5	0.75	1.5	0.584963	0.711723	0.147689
tr|Q6AXA7|Q6AXA7_XENLA	291	C	2	0	prpf6	MGC80263 protein OS=Xenopus laevis GN=prpf6 PE=2 SV=1	948	1	0	0.5	1	0.5	0	0.5	0.75	1.5	0.584963	0.711723	0.147689
sp|Q01588|RFA1_XENLA	8	C	1	127	rpa1	Replication protein A 70 kDa DNA-binding subunit OS=Xenopus laevis GN=rpa1 PE=1 SV=1	609	19	15	23	26	23	22	17	24.5	1.44118	0.527247	0.104483	0.980953
tr|Q4QQP4|Q4QQP4_XENLA	6	C	28	0	rfc3	MGC115007 protein OS=Xenopus laevis GN=rfc3 PE=2 SV=1	356	4	3	4	6	7	4	3.5	5	1.42857	0.514573	0.349886	0.456074
tr|Q6NRZ5|Q6NRZ5_XENLA	8		0	0	LOC397937	LOC397937 protein OS=Xenopus laevis GN=LOC397937 PE=2 SV=1	607	19	15	23	25	23	22	17	24	1.41176	0.4975	0.129048	0.889249
tr|B7ZRD4|B7ZRD4_XENLA	227		0	0	ak-c-A	Ak-c-A protein OS=Xenopus laevis GN=ak-c-A PE=2 SV=1	492	2	3	3	4	4	3	2.5	3.5	1.4	0.485427	0.292893	0.533291
tr|Q642P1|Q642P1_XENLA	227		0	0	LOC446967	LOC446967 protein (Fragment) OS=Xenopus laevis GN=LOC446967 PE=2 SV=1	467	2	3	3	4	4	3	2.5	3.5	1.4	0.485427	0.292893	0.533291
tr|Q8AV12|Q8AV12_XENLA	227		0	0	xak-c	Adult keratin XAK-C OS=Xenopus laevis GN=xak-c PE=2 SV=1	491	2	3	3	4	4	3	2.5	3.5	1.4	0.485427	0.292893	0.533291
tr|B7ZR97|B7ZR97_XENLA	119	C	0	1	LOC403373	Nibrin OS=Xenopus laevis GN=LOC403373 PE=2 SV=1	762	2	3	2	5	1	2	2.5	3.5	1.4	0.485427	0.62483	0.204238
tr|B7ZR99|B7ZR99_XENLA	119		0	0	LOC403373	Nibrin OS=Xenopus laevis GN=LOC403373 PE=2 SV=1	762	2	3	2	5	1	2	2.5	3.5	1.4	0.485427	0.62483	0.204238
tr|Q9DF71|Q9DF71_XENLA	68		0	0	ISWI	Imitation switch ISWI OS=Xenopus laevis GN=ISWI PE=2 SV=1	1046	3	5	5	6	8	4	4	5.5	1.375	0.459432	0.349886	0.456074
tr|A3KNE6|A3KNE6_XENLA	50	C	1	1	LOC100049116	LOC100049116 protein (Fragment) OS=Xenopus laevis GN=LOC100049116 PE=2 SV=1	58	0.5	1	1	1	3	1	0.75	1	1.33333	0.415037	0.5	0.30103
tr|Q0IH52|Q0IH52_XENLA	78		0	0	LOC432089	LOC432089 protein (Fragment) OS=Xenopus laevis GN=LOC432089 PE=2 SV=1	565	0.5	1	1	1	1	1	0.75	1	1.33333	0.415037	0.5	0.30103
tr|Q6IR72|Q6IR72_XENLA	78		0	0	LOC432089	LOC432089 protein (Fragment) OS=Xenopus laevis GN=LOC432089 PE=2 SV=1	566	0.5	1	1	1	1	1	0.75	1	1.33333	0.415037	0.5	0.30103
sp|P52301|RAN_XENLA	165	C	6	0	ran	GTP-binding nuclear protein Ran OS=Xenopus laevis GN=ran PE=1 SV=2	216	0.5	1	1	1	1	2	0.75	1	1.33333	0.415037	0.5	0.30103
tr|Q4QR44|Q4QR44_XENLA	191	C	5	0	rps15a	MGC114789 protein OS=Xenopus laevis GN=rps15a PE=2 SV=1	130	0.5	1	1	1	1	1	0.75	1	1.33333	0.415037	0.5	0.30103
sp|O93235|CIRBA_XENLA	215	C	5	0	cirbp-a	Cold-inducible RNA-binding protein A OS=Xenopus laevis GN=cirbp-a PE=1 SV=2	166	0.5	1	1	1	1	1	0.75	1	1.33333	0.415037	0.5	0.30103
tr|Q569U5|Q569U5_XENLA	232	C	4	0	LOC733188	LOC733188 protein (Fragment) OS=Xenopus laevis GN=LOC733188 PE=2 SV=1	1143	0.5	1	1	1	1	0	0.75	1	1.33333	0.415037	0.5	0.30103
tr|Q66KY6|Q66KY6_XENLA	326	C	5	0	rpl11	MGC85310 protein OS=Xenopus laevis GN=rpl11 PE=2 SV=1	177	0.5	1	1	1	1	1	0.75	1	1.33333	0.415037	0.5	0.30103
sp|Q7ZWS1|DUS3L_XENLA	158	C	3	0	dus3l	tRNA-dihydrouridine(47) synthase [NAD(P)(+)]-like OS=Xenopus laevis GN=dus3l PE=2 SV=1	640	0.5	1	1	1	0.5	0	0.75	1	1.33333	0.415037	0.5	0.30103
tr|D0VEW8|D0VEW8_XENLA	267	C	3	0	rev3l	DNA polymerase OS=Xenopus laevis GN=rev3l PE=2 SV=1	3139	0.5	1	1	1	0.5	0	0.75	1	1.33333	0.415037	0.5	0.30103
sp|A9ULZ2|BIR7B_XENLA	293		0	0	birc7-b	Baculoviral IAP repeat-containing protein 7-B OS=Xenopus laevis GN=birc7-b PE=2 SV=2	345	0.5	1	1	1	0.5	0	0.75	1	1.33333	0.415037	0.5	0.30103
tr|Q6DFM0|Q6DFM0_XENLA	68	C	5	31	smarca5	ISWI protein OS=Xenopus laevis GN=smarca5 PE=1 SV=1	1046	4	5	5	7	11	4	4.5	6	1.33333	0.415037	0.349886	0.456074
sp|Q6DFF2|BRD4B_XENLA	56	C	4	0	brd4-b	Bromodomain-containing protein 4B OS=Xenopus laevis GN=brd4-b PE=2 SV=1	1362	2	1	2	2	8	6	1.5	2	1.33333	0.415037	0.5	0.30103
tr|Q6GPC0|Q6GPC0_XENLA	167	C	25	1	top3a	DNA topoisomerase OS=Xenopus laevis GN=top3a PE=2 SV=1	1022	3	3	2	6	8	4	3	4	1.33333	0.415037	0.704833	0.151914
tr|B7ZRE7|B7ZRE7_XENLA	72	C	0	22	BRCA1	Breast and ovarian cancer susceptibility protein OS=Xenopus laevis GN=BRCA1 PE=2 SV=1	1579	3	3	3	5	5	3	3	4	1.33333	0.415037	0.5	0.30103
tr|Q90X96|Q90X96_XENLA	72		0	0	brca1	Breast and ovarian cancer susceptibility protein OS=Xenopus laevis GN=brca1 PE=1 SV=1	1579	3	3	3	5	5	3	3	4	1.33333	0.415037	0.5	0.30103
tr|Q91764|Q91764_XENLA	195		0	0		HMG-X protein OS=Xenopus laevis PE=2 SV=1	212	1	2	2	2	2	1	1.5	2	1.33333	0.415037	0.5	0.30103
tr|Q90X95|Q90X95_XENLA	117	C	0	10	bard1	BRCA1-associated RING domain protein OS=Xenopus laevis GN=bard1 PE=1 SV=1	772	2	1	1	3	1	2	1.5	2	1.33333	0.415037	0.711723	0.147689
tr|B7ZR58|B7ZR58_XENLA	117		0	0	BARD1	BARD1 protein OS=Xenopus laevis GN=BARD1 PE=2 SV=1	769	2	1	1	3	1	2	1.5	2	1.33333	0.415037	0.711723	0.147689
sp|Q9W603|SP16H_XENLA	0	C	0	127	supt16h	FACT complex subunit SPT16 OS=Xenopus laevis GN=supt16h PE=1 SV=2	1035	15	20	21	25	28	18	17.5	23	1.31429	0.394279	0.233917	0.630939
tr|B7ZQW8|B7ZQW8_XENLA	0		0	0	SUPT16H	SUPT16H protein OS=Xenopus laevis GN=SUPT16H PE=2 SV=1	1035	15	20	21	25	28	18	17.5	23	1.31429	0.394279	0.233917	0.630939
sp|P06900|H2B12_XENLA	32	C	1	0		Histone H2B 1.2 OS=Xenopus laevis PE=1 SV=2	126	5	5	6	7	7	8	5	6.5	1.3	0.378512	0.204833	0.688601
tr|Q5FWP3|Q5FWP3_XENLA	0		0	0	LOC733160	LOC733160 protein (Fragment) OS=Xenopus laevis GN=LOC733160 PE=2 SV=1	474	3	4	4	5	7	5	3.5	4.5	1.28571	0.36257	0.292893	0.533291
tr|Q5U510|Q5U510_XENLA	49	C	29	5	rpa3	LOC495401 protein OS=Xenopus laevis GN=rpa3 PE=2 SV=1	121	6	5	7	7	5	4	5.5	7	1.27273	0.347923	0.204833	0.688601
tr|A9UMQ0|A9UMQ0_XENLA	197	C	27	0	pnkp	LOC100137702 protein OS=Xenopus laevis GN=pnkp PE=2 SV=1	548	4	4	5	5	5	4	4	5	1.25	0.321928	#DIV/0!	#DIV/0!
tr|Q6PH89|Q6PH89_XENLA	18	C	0	2	hist1h2am	Histone H2A OS=Xenopus laevis GN=hist1h2am PE=2 SV=1	139	2	2	2	3	3	2	2	2.5	1.25	0.321928	0.5	0.30103
sp|Q6GM86|H2AX_XENLA	18		0	0	h2afx	Histone H2AX OS=Xenopus laevis GN=h2afx PE=1 SV=3	139	2	2	3	2	3	2	2	2.5	1.25	0.321928	0.5	0.30103
tr|Q6AZJ8|Q6AZJ8_XENLA	18		0	0	hist1h2aj	Histone H2A OS=Xenopus laevis GN=hist1h2aj PE=1 SV=1	130	2	2	3	2	3	2	2	2.5	1.25	0.321928	0.5	0.30103
tr|Q6DKE3|Q6DKE3_XENLA	18		0	0	hist1h2aa	Histone H2A OS=Xenopus laevis GN=hist1h2aa PE=2 SV=1	139	2	2	2	3	3	2	2	2.5	1.25	0.321928	0.5	0.30103
tr|Q6GQ59|Q6GQ59_XENLA	115	C	7	7	MGC80325	MGC80325 protein OS=Xenopus laevis GN=MGC80325 PE=2 SV=1	335	2	2	1	4	3	2	2	2.5	1.25	0.321928	0.795167	0.0995415
tr|Q6NRQ4|Q6NRQ4_XENLA	40		0	0	LOC431977	LOC431977 protein (Fragment) OS=Xenopus laevis GN=LOC431977 PE=2 SV=1	1078	2	2	3	2	2	1	2	2.5	1.25	0.321928	0.5	0.30103
tr|Q7ZTM5|Q7ZTM5_XENLA	115	C	6	0	rfc5	Rfc5-prov protein OS=Xenopus laevis GN=rfc5 PE=2 SV=1	335	2	2	3	2	2	2	2	2.5	1.25	0.321928	0.5	0.30103
tr|Q92134|Q92134_XENLA	123		0	0		Xenopus laevis histone gene cluster Xlh1 with genes H3, H4, H2B, H2A and H1B OS=Xenopus laevis PE=4 SV=2	76	2	2	2	3	2	1	2	2.5	1.25	0.321928	0.5	0.30103
tr|Q92135|Q92135_XENLA	123		0	0		Histone H3 (Fragment) OS=Xenopus laevis PE=4 SV=1	78	2	2	2	3	2	1	2	2.5	1.25	0.321928	0.5	0.30103
tr|Q802A8|Q802A8_XENLA	226	C	0	13	cbx3	Cbx3 protein OS=Xenopus laevis GN=cbx3 PE=2 SV=1	174	2	2	2	3	2	2	2	2.5	1.25	0.321928	0.5	0.30103
tr|O42156|O42156_XENLA	226		0	0	XHp1-gamma	Heterochromatin protein 1 gamma (Fragment) OS=Xenopus laevis GN=XHp1-gamma PE=2 SV=1	171	2	2	2	3	2	2	2	2.5	1.25	0.321928	0.5	0.30103
tr|Q7ZWZ6|Q7ZWZ6_XENLA	226		0	0	cbx3	Cbx3-prov protein OS=Xenopus laevis GN=cbx3 PE=2 SV=1	174	2	2	2	3	2	2	2	2.5	1.25	0.321928	0.5	0.30103
tr|Q498E8|Q498E8_XENLA	99	C	8	2	cul4b	MGC115611 protein OS=Xenopus laevis GN=cul4b PE=2 SV=1	858	3	1	2	3	1	0	2	2.5	1.25	0.321928	0.711723	0.147689
tr|Q7ZX99|Q7ZX99_XENLA	63	C	0	1	Tia1	Tia1 protein (Fragment) OS=Xenopus laevis GN=Tia1 PE=2 SV=1	427	1	1	0.5	2	1	1	1	1.25	1.25	0.321928	0.795167	0.0995415
tr|Q90WN1|Q90WN1_XENLA	63		0	0	tiar	TIAR protein (Fragment) OS=Xenopus laevis GN=tiar PE=2 SV=1	389	1	1	0.5	2	1	1	1	1.25	1.25	0.321928	0.795167	0.0995415
tr|Q6PCF3|Q6PCF3_XENLA	45	C	6	0	MGC69166	MGC69166 protein OS=Xenopus laevis GN=MGC69166 PE=2 SV=1	304	1	1	0.5	2	0.5	2	1	1.25	1.25	0.321928	0.795167	0.0995415
sp|Q9W6K1|MRE11_XENLA	19	C	48	0	mre11	Double-strand break repair protein MRE11 OS=Xenopus laevis GN=mre11 PE=2 SV=1	711	7	7	7	10	8	9	7	8.5	1.21429	0.280108	0.5	0.30103
sp|Q52KW8|RCC2_XENLA	39	C	1	33	rcc2	Protein RCC2 homolog OS=Xenopus laevis GN=rcc2 PE=2 SV=1	513	5	5	7	5	7	5	5	6	1.2	0.263034	0.5	0.30103
tr|Q6XV80|Q6XV80_XENLA	119	C	2	14	nbn	Nibrin OS=Xenopus laevis GN=nbn PE=1 SV=1	763	2	3	2	4	2	3	2.5	3	1.2	0.263034	0.711723	0.147689
tr|Q6EKW1|Q6EKW1_XENLA	119		0	0	NBS1	Nibrin OS=Xenopus laevis GN=NBS1 PE=2 SV=1	763	2	3	2	4	1	2	2.5	3	1.2	0.263034	0.711723	0.147689
sp|P23787|TERA_XENLA	20	C	62	6	vcp	Transitional endoplasmic reticulum ATPase OS=Xenopus laevis GN=vcp PE=1 SV=3	805	11	10	12	13	12	10	10.5	12.5	1.19048	0.251539	0.105573	0.976448
sp|P20397|NUCL_XENLA	111	C	10	40	ncl	Nucleolin OS=Xenopus laevis GN=ncl PE=2 SV=3	651	8	8	7	12	8	7	8	9.5	1.1875	0.247928	0.655958	0.183124
sp|P02281|H2B11_XENLA	32	C	0	42		Histone H2B 1.1 OS=Xenopus laevis PE=1 SV=2	126	6	6	6	8	8	8	6	7	1.16667	0.222392	0.5	0.30103
tr|Q92130|Q92130_XENLA	32		0	0	H2B	Histone H2B OS=Xenopus laevis GN=H2B PE=3 SV=1	126	6	6	6	8	8	8	6	7	1.16667	0.222392	0.5	0.30103
tr|Q76LD2|Q76LD2_XENLA	22	C	20	0	rfc4	RFC2 protein OS=Xenopus laevis GN=rfc4 PE=2 SV=1	363	3	3	4	3	4	3	3	3.5	1.16667	0.222392	0.5	0.30103
tr|A1L2N5|A1L2N5_XENLA	55		0	0	LOC100036902	LOC100036902 protein OS=Xenopus laevis GN=LOC100036902 PE=2 SV=1	377	2	4	3	4	3	4	3	3.5	1.16667	0.222392	0.711723	0.147689
tr|Q4JNX8|Q4JNX8_XENLA	5	C	0	11	RTS	RECQL4-helicase-like protein OS=Xenopus laevis GN=RTS PE=2 SV=1	1500	1	2	0.5	3	3	2	1.5	1.75	1.16667	0.222392	0.87723	0.0568864
tr|B1WBC8|B1WBC8_XENLA	5		0	0	rts	Rts protein OS=Xenopus laevis GN=rts PE=1 SV=1	1504	1	2	0.5	3	3	2	1.5	1.75	1.16667	0.222392	0.87723	0.0568864
tr|Q33DM4|Q33DM4_XENLA	5		0	0	recql4	RecQ4 protein OS=Xenopus laevis GN=recql4 PE=2 SV=1	1503	1	2	0.5	3	3	2	1.5	1.75	1.16667	0.222392	0.87723	0.0568864
tr|B7ZR96|B7ZR96_XENLA	111	C	3	19	LOC397919	LOC397919 protein OS=Xenopus laevis GN=LOC397919 PE=2 SV=1	704	8	11	9	13	12	9	9.5	11	1.15789	0.211504	0.613571	0.212135
tr|Q06459|Q06459_XENLA	111	C	0	6	ncl	Nucleolin OS=Xenopus laevis GN=ncl PE=2 SV=1	705	9	11	9	14	12	10	10	11.5	1.15	0.201634	0.657481	0.182117
tr|B7ZR98|B7ZR98_XENLA	111		0	0	LOC397919	LOC397919 protein OS=Xenopus laevis GN=LOC397919 PE=2 SV=1	704	9	11	9	14	12	10	10	11.5	1.15	0.201634	0.657481	0.182117
tr|A6YGN3|A6YGN3_XENLA	245	C	0	22	FANCG	Fanconi anemia complementation group G variant 2 OS=Xenopus laevis GN=FANCG PE=2 SV=1	591	3	4	3	5	3	4	3.5	4	1.14286	0.192645	0.711723	0.147689
tr|A6Y874|A6Y874_XENLA	245		0	0	fancg	Fanconi anemia complementation group G OS=Xenopus laevis GN=fancg PE=2 SV=1	640	3	4	3	5	3	4	3.5	4	1.14286	0.192645	0.711723	0.147689
tr|Q4VT50|Q4VT50_XENLA	53	C	69	0	fancd2	Fanconi anemia complementation group D2 OS=Xenopus laevis GN=fancd2 PE=2 SV=1	1443	11	11	10	15	13	9	11	12.5	1.13636	0.184425	0.655958	0.183124
tr|A2BDA0|A2BDA0_XENLA	67		0	0	hist1h4d	Histone H4 OS=Xenopus laevis GN=hist1h4d PE=2 SV=1	103	5	4	4	6	4	6	4.5	5	1.11111	0.152003	0.711723	0.147689
tr|B9VQ38|B9VQ38_XENLA	39		0	0		Telophase disc 60 kDa protein (Fragment) OS=Xenopus laevis PE=2 SV=1	497	5	5	7	4	7	5	5	5.5	1.1	0.137504	0.795167	0.0995415
sp|P31669|PARP1_XENLA	116		0	0	parp1	Poly [ADP-ribose] polymerase 1 (Fragment) OS=Xenopus laevis GN=parp1 PE=2 SV=1	998	5	5	5	6	7	4	5	5.5	1.1	0.137504	0.5	0.30103
tr|Q2NLA7|Q2NLA7_XENLA	116	C	3	32	parp1	Poly [ADP-ribose] polymerase OS=Xenopus laevis GN=parp1 PE=2 SV=1	1011	6	5	5	7	7	5	5.5	6	1.09091	0.125531	0.711723	0.147689
sp|P62799|H4_XENLA	67	C	19	29		Histone H4 OS=Xenopus laevis PE=1 SV=2	103	9	6	7	9	9	8	7.5	8	1.06667	0.0931094	0.810892	0.0910368
tr|Q2TAH7|Q2TAH7_XENLA	0	C	1	0		Uncharacterized protein OS=Xenopus laevis PE=2 SV=1	508	7	10	9	9	10	9	8.5	9	1.05882	0.0824622	0.795167	0.0995415
tr|Q6AZR6|Q6AZR6_XENLA	7	C	1	3	xrcc6	LOC398357 protein OS=Xenopus laevis GN=xrcc6 PE=2 SV=1	611	0.5	0	0.5	0	4	0	0.25	0.25	1	0	1	0
tr|Q9W626|Q9W626_XENLA	7		0	0		Ku70 autoantigen homologue (Fragment) OS=Xenopus laevis PE=2 SV=1	611	0.5	0	0.5	0	3	0	0.25	0.25	1	0	1	0
tr|Q9PWM7|Q9PWM7_XENLA	217	C	0	3	cdc7	Protein kinase Cdc7 OS=Xenopus laevis GN=cdc7 PE=2 SV=1	483	0.5	0	0.5	0	2	1	0.25	0.25	1	0	1	0
tr|O13045|O13045_XENLA	217		0	0		Cdc7-related kinase OS=Xenopus laevis PE=2 SV=1	483	0.5	0	0.5	0	2	1	0.25	0.25	1	0	1	0
sp|O42226|I4A3B_XENLA	269	C	0	2	eif4a3-b	Eukaryotic initiation factor 4A-III-B OS=Xenopus laevis GN=eif4a3-b PE=2 SV=1	414	0.5	0	0.5	0	2	0	0.25	0.25	1	0	1	0
sp|Q5U526|I4A3A_XENLA	269		0	0	eif4a3-a	Eukaryotic initiation factor 4A-III-A OS=Xenopus laevis GN=eif4a3-a PE=2 SV=1	415	0.5	0	0.5	0	2	0	0.25	0.25	1	0	1	0
tr|Q9W627|Q9W627_XENLA	288	C	0	4		Ku80 autoantigen homologue (Fragment) OS=Xenopus laevis PE=2 SV=1	726	0.5	0	0.5	0	2	2	0.25	0.25	1	0	1	0
tr|Q6DDS9|Q6DDS9_XENLA	288		0	0	xrcc5	X-ray repair cross-complementing protein 5 OS=Xenopus laevis GN=xrcc5 PE=2 SV=1	726	0.5	0	0.5	0	2	2	0.25	0.25	1	0	1	0
tr|Q6GR42|Q6GR42_XENLA	48	C	1	0	gtf2h2	MGC81060 protein OS=Xenopus laevis GN=gtf2h2 PE=2 SV=1	395	0.5	0	0.5	0	1	0	0.25	0.25	1	0	1	0
tr|Q3C2L7|Q3C2L7_XENLA	75	C	1	0	phr	CPD photolyase-like OS=Xenopus laevis GN=phr PE=2 SV=1	557	0.5	0	0.5	0	1	0	0.25	0.25	1	0	1	0
sp|Q66KH9|CDK8_XENLA	87	C	0	1	cdk8	Cyclin-dependent kinase 8 OS=Xenopus laevis GN=cdk8 PE=2 SV=1	416	0.5	0	0.5	0	1	0	0.25	0.25	1	0	1	0
tr|Q7T0R3|Q7T0R3_XENLA	87		0	0	cdk19	Cdk-8-prov protein OS=Xenopus laevis GN=cdk19 PE=2 SV=1	486	0.5	0	0.5	0	1	0	0.25	0.25	1	0	1	0
tr|Q0IH66|Q0IH66_XENLA	103	C	0	1	ddx10	Ddx10 protein OS=Xenopus laevis GN=ddx10 PE=2 SV=1	663	0.5	0	0.5	0	1	0	0.25	0.25	1	0	1	0
tr|Q4V7Z8|Q4V7Z8_XENLA	103		0	0	ddx10	Ddx10 protein (Fragment) OS=Xenopus laevis GN=ddx10 PE=2 SV=1	717	0.5	0	0.5	0	1	0	0.25	0.25	1	0	1	0
tr|Q5XGT4|Q5XGT4_XENLA	107		0	0	krt5.2	LOC495267 protein OS=Xenopus laevis GN=krt5.2 PE=2 SV=1	590	0.5	0	0.5	0	1	1	0.25	0.25	1	0	1	0
sp|O73787|GCP3_XENLA	116		0	0	tubgcp3	Gamma-tubulin complex component 3 homolog OS=Xenopus laevis GN=tubgcp3 PE=1 SV=1	906	0.5	0	0.5	0	1	0	0.25	0.25	1	0	1	0
tr|Q6PF23|Q6PF23_XENLA	116		0	0	tubgcp3	MGC69134 protein OS=Xenopus laevis GN=tubgcp3 PE=2 SV=1	906	0.5	0	0.5	0	1	0	0.25	0.25	1	0	1	0
tr|O57438|O57438_XENLA	118	C	0	1		Serine/threonine-protein phosphatase OS=Xenopus laevis PE=2 SV=2	518	0.5	0	0.5	0	1	0	0.25	0.25	1	0	1	0
tr|Q6AXB0|Q6AXB0_XENLA	118		0	0	ppp3ca	Serine/threonine-protein phosphatase OS=Xenopus laevis GN=ppp3ca PE=2 SV=1	511	0.5	0	0.5	0	1	0	0.25	0.25	1	0	1	0
tr|Q6IR94|Q6IR94_XENLA	118		0	0	ppp3cb	Serine/threonine-protein phosphatase OS=Xenopus laevis GN=ppp3cb PE=2 SV=1	507	0.5	0	0.5	0	1	0	0.25	0.25	1	0	1	0
tr|Q801N4|Q801N4_XENLA	118		0	0		Serine/threonine-protein phosphatase OS=Xenopus laevis PE=2 SV=1	518	0.5	0	0.5	0	1	0	0.25	0.25	1	0	1	0
tr|Q9DEF7|Q9DEF7_XENLA	118		0	0		Serine/threonine-protein phosphatase OS=Xenopus laevis PE=2 SV=1	508	0.5	0	0.5	0	1	0	0.25	0.25	1	0	1	0
tr|Q7ZYU2|Q7ZYU2_XENLA	120	C	0	1	hnrnpa0	LOC398455 protein (Fragment) OS=Xenopus laevis GN=hnrnpa0 PE=2 SV=1	308	0.5	0	0.5	0	1	0	0.25	0.25	1	0	1	0
tr|Q6DKN1|Q6DKN1_XENLA	120		0	0	LOC398455	LOC398455 protein OS=Xenopus laevis GN=LOC398455 PE=2 SV=1	303	0.5	0	0.5	0	1	0	0.25	0.25	1	0	1	0
tr|Q6INS8|Q6INS8_XENLA	157	C	1	0	gmeb1	MGC81052 protein OS=Xenopus laevis GN=gmeb1 PE=2 SV=1	502	0.5	0	0.5	0	1	0	0.25	0.25	1	0	1	0
tr|Q6GN08|Q6GN08_XENLA	162	C	1	0	ncapd3	LOC398742 protein OS=Xenopus laevis GN=ncapd3 PE=2 SV=1	1492	0.5	0	0.5	0	1	0	0.25	0.25	1	0	1	0
tr|Q6GN97|Q6GN97_XENLA	167		0	0	yrdc	LOC398509 protein OS=Xenopus laevis GN=yrdc PE=2 SV=1	236	0.5	0	0.5	0	1	0	0.25	0.25	1	0	1	0
tr|Q6GR13|Q6GR13_XENLA	167		0	0	gtf2i	MGC81388 protein OS=Xenopus laevis GN=gtf2i PE=2 SV=1	925	0.5	0	0.5	0	1	0	0.25	0.25	1	0	1	0
tr|Q7ZX49|Q7ZX49_XENLA	167		0	0	LOC398509	LOC398509 protein (Fragment) OS=Xenopus laevis GN=LOC398509 PE=2 SV=1	188	0.5	0	0.5	0	1	0	0.25	0.25	1	0	1	0
sp|Q9I869|KF22A_XENLA	181		0	0	kif22-a	Kinesin-like protein KIF22-A OS=Xenopus laevis GN=kif22-a PE=1 SV=1	651	0.5	0	0.5	0	1	0	0.25	0.25	1	0	1	0
tr|Q7T0S3|Q7T0S3_XENLA	208	C	1	0	atp6ap2	Atp6ap2-prov protein OS=Xenopus laevis GN=atp6ap2 PE=1 SV=1	348	0.5	0	0.5	0	1	0	0.25	0.25	1	0	1	0
tr|Q6NTT2|Q6NTT2_XENLA	211	C	1	0	rps18	MGC82306 protein OS=Xenopus laevis GN=rps18 PE=2 SV=1	152	0.5	0	0.5	0	1	0	0.25	0.25	1	0	1	0
sp|P55862|MCM5A_XENLA	212	C	0	1	mcm5-a	DNA replication licensing factor mcm5-A OS=Xenopus laevis GN=mcm5-a PE=1 SV=2	735	0.5	0	0.5	0	1	0	0.25	0.25	1	0	1	0
sp|Q6PCI7|MCM5B_XENLA	212		0	0	mcm5-b	DNA replication licensing factor mcm5-B OS=Xenopus laevis GN=mcm5-b PE=2 SV=1	735	0.5	0	0.5	0	1	0	0.25	0.25	1	0	1	0
tr|Q5HZR6|Q5HZR6_XENLA	214	C	1	0	LOC496324	LOC496324 protein OS=Xenopus laevis GN=LOC496324 PE=2 SV=1	292	0.5	0	0.5	0	1	0	0.25	0.25	1	0	1	0
sp|Q9DEI1|PRKDC_XENLA	236	C	2	0	prkdc	DNA-dependent protein kinase catalytic subunit OS=Xenopus laevis GN=prkdc PE=2 SV=1	4146	0.5	0	0.5	0	1	1	0.25	0.25	1	0	1	0
sp|P45593|COF1B_XENLA	238	C	0	1	cfl1-b	Cofilin-1-B OS=Xenopus laevis GN=cfl1-b PE=1 SV=3	168	0.5	0	0.5	0	1	0	0.25	0.25	1	0	1	0
sp|P45695|COF1A_XENLA	238		0	0	cfl1-a	Cofilin-1-A OS=Xenopus laevis GN=cfl1-a PE=1 SV=3	168	0.5	0	0.5	0	1	0	0.25	0.25	1	0	1	0
sp|Q71U00|SKP1_XENLA	270	C	3	0	skp1	S-phase kinase-associated protein 1 OS=Xenopus laevis GN=skp1 PE=1 SV=3	163	0.5	0	0.5	0	1	2	0.25	0.25	1	0	1	0
sp|Q6NRP2|PSME4_XENLA	278	C	0	2	psme4	Proteasome activator complex subunit 4 OS=Xenopus laevis GN=psme4 PE=2 SV=1	1828	0.5	0	0.5	0	1	1	0.25	0.25	1	0	1	0
tr|Q68FC4|Q68FC4_XENLA	278		0	0	fam107b	MGC78851 protein OS=Xenopus laevis GN=fam107b PE=2 SV=1	131	0.5	0	0.5	0	1	1	0.25	0.25	1	0	1	0
sp|Q569Z1|EIF3B_XENLA	287	C	1	0	eif3b	Eukaryotic translation initiation factor 3 subunit B OS=Xenopus laevis GN=eif3b PE=2 SV=1	688	0.5	0	0.5	0	1	0	0.25	0.25	1	0	1	0
tr|Q5M957|Q5M957_XENLA	305	C	1	0	dera	LOC496174 protein OS=Xenopus laevis GN=dera PE=2 SV=1	318	0.5	0	0.5	0	1	0	0.25	0.25	1	0	1	0
sp|Q8AVC1|AN32B_XENLA	307	C	0	1	anp32b	Acidic leucine-rich nuclear phosphoprotein 32 family member B OS=Xenopus laevis GN=anp32b PE=2 SV=1	239	0.5	0	0.5	0	1	0	0.25	0.25	1	0	1	0
tr|Q2TAF9|Q2TAF9_XENLA	307		0	0	anp32c	MGC132157 protein OS=Xenopus laevis GN=anp32c PE=2 SV=1	245	0.5	0	0.5	0	1	0	0.25	0.25	1	0	1	0
sp|Q6GLY5|ASUN_XENLA	308	C	1	0	asun	Protein asunder homolog OS=Xenopus laevis GN=asun PE=2 SV=1	715	0.5	0	0.5	0	1	0	0.25	0.25	1	0	1	0
sp|Q9DDY9|PAB2A_XENLA	309	C	0	1	pabpn1-a	Polyadenylate-binding protein 2-A OS=Xenopus laevis GN=pabpn1-a PE=2 SV=1	296	0.5	0	0.5	0	1	0	0.25	0.25	1	0	1	0
sp|Q7ZXB8|PAB2B_XENLA	309		0	0	pabpn1-b	Polyadenylate-binding protein 2-B OS=Xenopus laevis GN=pabpn1-b PE=2 SV=1	295	0.5	0	0.5	0	1	0	0.25	0.25	1	0	1	0
tr|Q801P9|Q801P9_XENLA	338	C	0	1		MGC53795 protein OS=Xenopus laevis PE=2 SV=1	607	0.5	0	0.5	0	1	0	0.25	0.25	1	0	1	0
tr|Q63ZR1|Q63ZR1_XENLA	338		0	0	DDX5	DDX5 protein OS=Xenopus laevis GN=DDX5 PE=2 SV=1	608	0.5	0	0.5	0	1	0	0.25	0.25	1	0	1	0
tr|Q9I8S3|Q9I8S3_XENLA	338		0	0	ddx5	P68 RNA helicase OS=Xenopus laevis GN=ddx5 PE=2 SV=1	608	0.5	0	0.5	0	1	0	0.25	0.25	1	0	1	0
tr|Q6NRV0|Q6NRV0_XENLA	154	C	1	0	traip	MGC81341 protein OS=Xenopus laevis GN=traip PE=2 SV=1	464	0.5	0	0.5	0	0.5	1	0.25	0.25	1	0	1	0
tr|Q6GPS9|Q6GPS9_XENLA	204	C	1	0	hadha	MGC82638 protein OS=Xenopus laevis GN=hadha PE=2 SV=1	760	0.5	0	0.5	0	0.5	1	0.25	0.25	1	0	1	0
tr|Q09044|Q09044_XENLA	216	C	1	0	XFO	Zinc finger protein (Fragment) OS=Xenopus laevis GN=XFO 1-1 PE=2 SV=1	233	0.5	0	0.5	0	0.5	1	0.25	0.25	1	0	1	0
tr|Q5G8Z4|Q5G8Z4_XENLA	224	C	1	0	tcof1	Treacle OS=Xenopus laevis GN=tcof1 PE=2 SV=1	1476	0.5	0	0.5	0	0.5	1	0.25	0.25	1	0	1	0
sp|Q4V7N4|TMA16_XENLA	254	C	1	0	tma16	Translation machinery-associated protein 16 OS=Xenopus laevis GN=tma16 PE=2 SV=1	196	0.5	0	0.5	0	0.5	1	0.25	0.25	1	0	1	0
tr|B1N659|B1N659_XENLA	268	C	1	0	kcnq1	KvLQT-1 OS=Xenopus laevis GN=kcnq1 PE=2 SV=1	652	0.5	0	0.5	0	0.5	1	0.25	0.25	1	0	1	0
tr|Q0VGW8|Q0VGW8_XENLA	271	C	0	1	hal.2	Histidine ammonia-lyase OS=Xenopus laevis GN=hal.2 PE=2 SV=1	664	0.5	0	0.5	0	0.5	1	0.25	0.25	1	0	1	0
tr|Q6GMC2|Q6GMC2_XENLA	271		0	0	MGC81887	Histidine ammonia-lyase OS=Xenopus laevis GN=MGC81887 PE=2 SV=1	664	0.5	0	0.5	0	0.5	1	0.25	0.25	1	0	1	0
tr|A1L2I6|A1L2I6_XENLA	276	C	1	0	LOC100036859	LOC100036859 protein OS=Xenopus laevis GN=LOC100036859 PE=2 SV=1	599	0.5	0	0.5	0	0.5	1	0.25	0.25	1	0	1	0
tr|Q6DD35|Q6DD35_XENLA	60		0	0	HELLS	HELLS protein (Fragment) OS=Xenopus laevis GN=HELLS PE=2 SV=1	756	16	10	11	15	14	13	13	13	1	0	1	0
sp|Q08D75|BRD4A_XENLA	56	C	4	21	brd4-a	Bromodomain-containing protein 4A OS=Xenopus laevis GN=brd4-a PE=2 SV=1	1351	3	3	3	3	7	6	3	3	1	0	#DIV/0!	#DIV/0!
sp|Q9DE27|RUVB2_XENLA	58	C	0	23	ruvbl2	RuvB-like 2 OS=Xenopus laevis GN=ruvbl2 PE=2 SV=1	462	5	2	2	5	7	2	3.5	3.5	1	0	1	0
tr|Q0IH85|Q0IH85_XENLA	58	C	2	0	ruvbl2	LOC398205 protein OS=Xenopus laevis GN=ruvbl2 PE=2 SV=1	462	5	2	2	5	7	2	3.5	3.5	1	0	1	0
tr|Q801R1|Q801R1_XENLA	58		0	0		Ruvbl2-prov protein OS=Xenopus laevis PE=2 SV=1	462	5	2	2	5	7	2	3.5	3.5	1	0	1	0
tr|Q92131|Q92131_XENLA	32		0	0	H2B	Histone H2B OS=Xenopus laevis GN=H2B PE=3 SV=1	126	5	5	4	6	6	6	5	5	1	0	1	0
sp|P84233|H32_XENLA	123	C	0	19		Histone H3.2 OS=Xenopus laevis PE=1 SV=2	136	3	3	2	4	5	2	3	3	1	0	1	0
sp|P02302|H3C_XENLA	123		0	0	h3f3c	Histone H3.3C OS=Xenopus laevis GN=h3f3c PE=1 SV=2	136	3	3	2	4	5	2	3	3	1	0	1	0
sp|Q6PI79|H33_XENLA	123		0	0		Histone H3.3 OS=Xenopus laevis PE=1 SV=3	136	3	3	2	4	5	2	3	3	1	0	1	0
tr|Q92133|Q92133_XENLA	123		0	0	hist1h3g	Histone H3 OS=Xenopus laevis GN=hist1h3g PE=1 SV=1	136	3	3	2	4	5	2	3	3	1	0	1	0
sp|Q91636|KIF2C_XENLA	124	C	26	0	kif2c	Kinesin-like protein KIF2C OS=Xenopus laevis GN=kif2c PE=1 SV=2	730	4	5	4	5	5	3	4.5	4.5	1	0	1	0
tr|Q7SYZ0|Q7SYZ0_XENLA	222	C	20	0	vrk1	Vrk1-prov protein OS=Xenopus laevis GN=vrk1 PE=2 SV=1	144	3	3	3	3	5	3	3	3	1	0	#DIV/0!	#DIV/0!
tr|A1A645|A1A645_XENLA	111		0	0		Uncharacterized protein (Fragment) OS=Xenopus laevis PE=2 SV=1	371	3	3	2	4	4	4	3	3	1	0	1	0
tr|A9ULV9|A9ULV9_XENLA	111		0	0		Uncharacterized protein (Fragment) OS=Xenopus laevis PE=2 SV=1	371	3	3	2	4	4	4	3	3	1	0	1	0
tr|Q3KPL2|Q3KPL2_XENLA	111		0	0		Uncharacterized protein (Fragment) OS=Xenopus laevis PE=2 SV=1	370	3	3	2	4	4	4	3	3	1	0	1	0
tr|Q6GQE3|Q6GQE3_XENLA	111		0	0		Uncharacterized protein (Fragment) OS=Xenopus laevis PE=2 SV=1	371	3	3	2	4	4	4	3	3	1	0	1	0
tr|Q8AVC8|Q8AVC8_XENLA	111		0	0	LOC397919	LOC397919 protein (Fragment) OS=Xenopus laevis GN=LOC397919 PE=2 SV=1	370	3	3	2	4	4	4	3	3	1	0	1	0
tr|Q6DCY8|Q6DCY8_XENLA	169	C	0	15	wdr5	Wdr5-prov protein OS=Xenopus laevis GN=wdr5 PE=2 SV=1	334	2	2	2	2	4	3	2	2	1	0	#DIV/0!	#DIV/0!
tr|Q66J98|Q66J98_XENLA	169		0	0	wdr5	Wdr5-b-prov protein OS=Xenopus laevis GN=wdr5 PE=2 SV=1	334	2	2	2	2	4	3	2	2	1	0	#DIV/0!	#DIV/0!
sp|P05782|K1C3_XENLA	227	C	0	21	xk81b1	Keratin, type I cytoskeletal 47 kDa (Fragment) OS=Xenopus laevis GN=xk81b1 PE=3 SV=2	280	3	4	3	4	4	3	3.5	3.5	1	0	1	0
sp|P10995|ACT2_XENLA	55	C	0	21	act2	Actin, alpha skeletal muscle 2 OS=Xenopus laevis GN=act2 PE=2 SV=1	377	3	4	3	4	3	4	3.5	3.5	1	0	1	0
sp|P04751|ACTC_XENLA	55		0	0	actc1	Actin, alpha cardiac muscle 1 OS=Xenopus laevis GN=actc1 PE=2 SV=1	377	3	4	3	4	3	4	3.5	3.5	1	0	1	0
sp|P04752|ACT3_XENLA	55		0	0	act3	Actin, alpha skeletal muscle 3 OS=Xenopus laevis GN=act3 PE=2 SV=2	377	3	4	3	4	3	4	3.5	3.5	1	0	1	0
sp|P20399|ACT2_XENTR	55		0	0		Actin, alpha cardiac muscle 2 OS=Xenopus tropicalis PE=2 SV=1	377	3	4	3	4	3	4	3.5	3.5	1	0	1	0
sp|Q6P640|ACTC_XENTR	55		0	0	actc1	Actin, alpha cardiac muscle 1 OS=Xenopus tropicalis GN=actc1 PE=2 SV=1	377	3	4	3	4	3	4	3.5	3.5	1	0	1	0
sp|Q6P8G3|ACT3_XENTR	55		0	0	act3	Actin, alpha sarcomeric/skeletal OS=Xenopus tropicalis GN=act3 PE=2 SV=1	377	3	4	3	4	3	4	3.5	3.5	1	0	1	0
tr|Q52QH5|Q52QH5_XENLA	55		0	0		Smooth muscle alpha actin OS=Xenopus laevis PE=2 SV=1	377	3	4	3	4	3	4	3.5	3.5	1	0	1	0
tr|Q6IP22|Q6IP22_XENLA	55		0	0	acta1	MGC79012 protein OS=Xenopus laevis GN=acta1 PE=2 SV=1	377	3	4	3	4	3	4	3.5	3.5	1	0	1	0
tr|Q6NS10|Q6NS10_XENLA	55		0	0	acta2	MGC78870 protein OS=Xenopus laevis GN=acta2 PE=2 SV=1	377	3	4	3	4	3	4	3.5	3.5	1	0	1	0
tr|Q7SYU4|Q7SYU4_XENLA	55		0	0	MGC64484	MGC64484 protein OS=Xenopus laevis GN=MGC64484 PE=2 SV=1	377	3	4	3	4	3	4	3.5	3.5	1	0	1	0
tr|Q7ZWR7|Q7ZWR7_XENLA	55		0	0		MGC53823 protein OS=Xenopus laevis PE=2 SV=1	377	3	4	3	4	3	4	3.5	3.5	1	0	1	0
tr|Q4V861|Q4V861_XENLA	56		0	0	LOC443648	LOC443648 protein (Fragment) OS=Xenopus laevis GN=LOC443648 PE=2 SV=1	572	2	2	2	2	3	4	2	2	1	0	#DIV/0!	#DIV/0!
tr|Q6GNR0|Q6GNR0_XENLA	56		0	0	LOC443648	LOC443648 protein (Fragment) OS=Xenopus laevis GN=LOC443648 PE=2 SV=1	559	2	2	2	2	3	4	2	2	1	0	#DIV/0!	#DIV/0!
tr|Q6NRU3|Q6NRU3_XENLA	65	C	20	0	rfc2	MGC81391 protein OS=Xenopus laevis GN=rfc2 PE=2 SV=1	348	4	3	4	3	3	3	3.5	3.5	1	0	1	0
tr|Q3B8L3|Q3B8L3_XENLA	78		0	0		Uncharacterized protein (Fragment) OS=Xenopus laevis PE=2 SV=1	571	3	2	2	3	3	2	2.5	2.5	1	0	1	0
tr|Q4V873|Q4V873_XENLA	78		0	0		Uncharacterized protein (Fragment) OS=Xenopus laevis PE=2 SV=1	571	3	2	2	3	3	2	2.5	2.5	1	0	1	0
tr|Q5XHK1|Q5XHK1_XENLA	78		0	0		Uncharacterized protein (Fragment) OS=Xenopus laevis PE=2 SV=1	571	3	2	2	3	3	2	2.5	2.5	1	0	1	0
tr|Q8AVX7|Q8AVX7_XENLA	90	C	0	13	smarce1	Smarce1 protein OS=Xenopus laevis GN=smarce1 PE=2 SV=1	402	2	2	2	2	3	2	2	2	1	0	#DIV/0!	#DIV/0!
tr|Q5XH26|Q5XH26_XENLA	90		0	0	smarce1	Smarce1 protein OS=Xenopus laevis GN=smarce1 PE=2 SV=1	423	2	2	2	2	3	2	2	2	1	0	#DIV/0!	#DIV/0!
tr|Q8QG95|Q8QG95_XENLA	90		0	0		Baf57 OS=Xenopus laevis PE=2 SV=1	423	2	2	2	2	3	2	2	2	1	0	#DIV/0!	#DIV/0!
tr|Q7ZXK5|Q7ZXK5_XENLA	195	C	5	10	MGC52578	MGC52578 protein OS=Xenopus laevis GN=MGC52578 PE=2 SV=1	212	2	3	3	2	3	2	2.5	2.5	1	0	1	0
tr|B1H1P5|B1H1P5_XENLA	40	C	2	12	LOC100158273	LOC100158273 protein (Fragment) OS=Xenopus laevis GN=LOC100158273 PE=2 SV=1	1115	2	3	3	2	2	2	2.5	2.5	1	0	1	0
sp|Q6NUF4|TPX2A_XENLA	41	C	6	1	tpx2-a	Targeting protein for Xklp2-A OS=Xenopus laevis GN=tpx2-a PE=1 SV=1	716	2	0	1	1	2	1	1	1	1	0	1	0
tr|Q4V867|Q4V867_XENLA	131	C	11	0	orc5	MGC114641 protein OS=Xenopus laevis GN=orc5 PE=2 SV=1	448	2	1	1	2	2	3	1.5	1.5	1	0	1	0
tr|Q70YG6|Q70YG6_XENLA	155	C	0	10	cyp	Peptidyl-prolyl cis-trans isomerase (Fragment) OS=Xenopus laevis GN=cyp PE=2 SV=1	157	3	0	2	1	2	2	1.5	1.5	1	0	1	0
tr|Q8AVP8|Q8AVP8_XENLA	155		0	0		Peptidyl-prolyl cis-trans isomerase OS=Xenopus laevis PE=2 SV=1	164	3	0	2	1	2	2	1.5	1.5	1	0	1	0
sp|P13549|EF1A0_XENLA	173		0	0	eef1as	Elongation factor 1-alpha, somatic form OS=Xenopus laevis GN=eef1as PE=2 SV=1	462	1	2	1	2	2	1	1.5	1.5	1	0	1	0
tr|A1L3K0|A1L3K0_XENLA	173		0	0	LOC100037028	Elongation factor 1-alpha (Fragment) OS=Xenopus laevis GN=LOC100037028 PE=2 SV=1	470	1	2	1	2	2	1	1.5	1.5	1	0	1	0
tr|Q640D9|Q640D9_XENLA	173		0	0	LOC494720	Elongation factor 1-alpha OS=Xenopus laevis GN=LOC494720 PE=2 SV=1	461	1	2	1	2	2	1	1.5	1.5	1	0	1	0
sp|Q7ZYL5|KF22B_XENLA	181	C	4	1	kif22-b	Kinesin-like protein KIF22-B OS=Xenopus laevis GN=kif22-b PE=2 SV=2	650	0.5	1	0.5	1	2	1	0.75	0.75	1	0	1	0
tr|Q5XGU0|Q5XGU0_XENLA	227	C	0	6	krt17	LOC495266 protein OS=Xenopus laevis GN=krt17 PE=2 SV=1	452	2	2	2	2	2	2	2	2	1	0	#DIV/0!	#DIV/0!
sp|P05781|K1C4_XENLA	227		0	0	xk81b2	Keratin, type I cytoskeletal 47 kDa OS=Xenopus laevis GN=xk81b2 PE=2 SV=1	419	2	2	2	2	2	2	2	2	1	0	#DIV/0!	#DIV/0!
tr|E3WF12|E3WF12_XENLA	227		0	0	FGK	Fin and gill-specific type-1 keratin OS=Xenopus laevis GN=FGK PE=2 SV=1	424	2	2	2	2	2	2	2	2	1	0	#DIV/0!	#DIV/0!
tr|Q4QR57|Q4QR57_XENLA	227		0	0	krt12	LOC398464 protein OS=Xenopus laevis GN=krt12 PE=2 SV=1	454	2	2	2	2	2	2	2	2	1	0	#DIV/0!	#DIV/0!
tr|Q6DKC7|Q6DKC7_XENLA	227		0	0	MGC84118	MGC84118 protein OS=Xenopus laevis GN=MGC84118 PE=2 SV=1	458	2	2	2	2	2	2	2	2	1	0	#DIV/0!	#DIV/0!
tr|Q7ZY83|Q7ZY83_XENLA	227		0	0	LOC398464	LOC398464 protein (Fragment) OS=Xenopus laevis GN=LOC398464 PE=2 SV=1	469	2	2	2	2	2	2	2	2	1	0	#DIV/0!	#DIV/0!
sp|Q3B8D5|KATL2_XENLA	20		0	0	katnal2	Katanin p60 ATPase-containing subunit A-like 2 OS=Xenopus laevis GN=katnal2 PE=2 SV=1	505	1	1	1	1	1	1	1	1	1	0	#DIV/0!	#DIV/0!
tr|Q6GP55|Q6GP55_XENLA	68		0	0	smarca1	MGC80667 protein OS=Xenopus laevis GN=smarca1 PE=2 SV=1	403	0.5	1	0.5	1	1	1	0.75	0.75	1	0	1	0
tr|Q71R48|Q71R48_XENLA	78		0	0	BRM	BRM protein (Fragment) OS=Xenopus laevis GN=BRM PE=2 SV=1	309	1	1	1	1	1	1	1	1	1	0	#DIV/0!	#DIV/0!
tr|B1H1W4|B1H1W4_XENLA	106	C	8	0	men1	LOC100158320 protein OS=Xenopus laevis GN=men1 PE=2 SV=1	675	1	2	2	1	1	1	1.5	1.5	1	0	1	0
tr|Q52KD5|Q52KD5_XENLA	137	C	8	0	LOC733229	LOC733229 protein (Fragment) OS=Xenopus laevis GN=LOC733229 PE=2 SV=1	294	2	1	1	2	1	1	1.5	1.5	1	0	1	0
sp|Q6P6Z0|DDB1_XENLA	139	C	15	0	ddb1	DNA damage-binding protein 1 OS=Xenopus laevis GN=ddb1 PE=2 SV=1	1140	4	3	3	4	1	0	3.5	3.5	1	0	1	0
sp|Q9DED4|CIRBB_XENLA	176	C	5	0	cirbp-b	Cold-inducible RNA-binding protein B OS=Xenopus laevis GN=cirbp-b PE=1 SV=1	166	1	1	1	1	1	0	1	1	1	0	#DIV/0!	#DIV/0!
tr|Q8UVR4|Q8UVR4_XENLA	177		0	0		Williams syndrome transcription factor (Fragment) OS=Xenopus laevis PE=2 SV=1	1079	0.5	1	0.5	1	1	0	0.75	0.75	1	0	1	0
tr|Q7ZYN9|Q7ZYN9_XENLA	227	C	5	0		MGC53311 protein OS=Xenopus laevis PE=2 SV=1	375	2	2	2	2	1	2	2	2	1	0	#DIV/0!	#DIV/0!
sp|P08777|K1C1_XENLA	227		0	0	xk81a1	Keratin, type I cytoskeletal 47 kDa OS=Xenopus laevis GN=xk81a1 PE=2 SV=1	429	1	1	1	1	1	1	1	1	1	0	#DIV/0!	#DIV/0!
sp|P08802|K118A_XENLA	227		0	0	krt18-a	Keratin, type I cytoskeletal 18-A OS=Xenopus laevis GN=krt18-a PE=2 SV=2	428	1	1	1	1	1	1	1	1	1	0	#DIV/0!	#DIV/0!
sp|Q7SY65|K118B_XENLA	227		0	0	krt18-b	Keratin, type I cytoskeletal 18-B OS=Xenopus laevis GN=krt18-b PE=2 SV=1	432	1	1	1	1	1	1	1	1	1	0	#DIV/0!	#DIV/0!
tr|Q2VPN9|Q2VPN9_XENLA	227		0	0	xk81a1	MGC68905 protein OS=Xenopus laevis GN=xk81a1 PE=2 SV=1	437	1	1	1	1	1	1	1	1	1	0	#DIV/0!	#DIV/0!
tr|Q6DDD5|Q6DDD5_XENLA	227		0	0	krt16	Krt16-prov protein OS=Xenopus laevis GN=krt16 PE=2 SV=1	423	1	1	1	1	1	1	1	1	1	0	#DIV/0!	#DIV/0!
tr|Q7T0X6|Q7T0X6_XENLA	227		0	0	MGC68905	MGC68905 protein OS=Xenopus laevis GN=MGC68905 PE=2 SV=1	437	1	1	1	1	1	1	1	1	1	0	#DIV/0!	#DIV/0!
tr|Q98UJ1|Q98UJ1_XENLA	227		0	0	xak-b	Adult keratin XAK-B OS=Xenopus laevis GN=xak-b PE=2 SV=1	497	1	1	1	1	1	1	1	1	1	0	#DIV/0!	#DIV/0!
sp|Q6PAF4|NSE1_XENLA	230	C	6	0	nsmce1	Non-structural maintenance of chromosomes element 1 homolog OS=Xenopus laevis GN=nsmce1 PE=2 SV=1	270	1	1	1	1	1	1	1	1	1	0	#DIV/0!	#DIV/0!
tr|Q698P6|Q698P6_XENLA	237	C	4	0	fancf	Fanconi anemia protein OS=Xenopus laevis GN=fancf PE=2 SV=1	339	0.5	1	0.5	1	1	1	0.75	0.75	1	0	1	0
tr|Q3KQ13|Q3KQ13_XENLA	246	C	10	0	MGC131121	MGC131121 protein OS=Xenopus laevis GN=MGC131121 PE=2 SV=1	378	2	2	2	2	1	1	2	2	1	0	#DIV/0!	#DIV/0!
sp|Q6GPW2|SMO2B_XENLA	302		0	0	sumo2-b	Small ubiquitin-related modifier 2-B OS=Xenopus laevis GN=sumo2-b PE=3 SV=1	95	0.5	1	0.5	1	1	0	0.75	0.75	1	0	1	0
sp|Q7ZTK7|SMO2A_XENLA	302		0	0	sumo2-a	Small ubiquitin-related modifier 2-A OS=Xenopus laevis GN=sumo2-a PE=3 SV=1	95	0.5	1	0.5	1	1	0	0.75	0.75	1	0	1	0
tr|Q6GQK3|Q6GQK3_XENLA	313	C	6	0	dpy30	MGC79089 protein OS=Xenopus laevis GN=dpy30 PE=2 SV=1	99	1	1	1	1	1	1	1	1	1	0	#DIV/0!	#DIV/0!
sp|Q7T0M6|AS1AB_XENLA	321	C	3	0	asf1ab	Histone chaperone asf1a-B OS=Xenopus laevis GN=asf1ab PE=2 SV=1	200	0.5	1	0.5	1	1	0	0.75	0.75	1	0	1	0
sp|O57686|SMO1A_XENLA	322	C	0	4	sumo1-a	Small ubiquitin-related modifier 1-A OS=Xenopus laevis GN=sumo1-a PE=1 SV=1	102	0.5	1	0.5	1	1	1	0.75	0.75	1	0	1	0
sp|Q5EAX4|SMO1B_XENLA	322		0	0	sumo1-b	Small ubiquitin-related modifier 1-B OS=Xenopus laevis GN=sumo1-b PE=3 SV=1	102	0.5	1	0.5	1	1	1	0.75	0.75	1	0	1	0
tr|B7ZQM3|B7ZQM3_XENLA	322		0	0	MGC85025	Small ubiquitin-related modifier OS=Xenopus laevis GN=MGC85025 PE=2 SV=1	102	0.5	1	0.5	1	1	1	0.75	0.75	1	0	1	0
sp|P30883|TBB4_XENLA	59	C	0	2	tubb4	Tubulin beta-4 chain OS=Xenopus laevis GN=tubb4 PE=2 SV=1	445	0.5	1	0.5	1	0.5	0	0.75	0.75	1	0	1	0
tr|Q4KLE9|Q4KLE9_XENLA	59		0	0	LOC446922	LOC446922 protein OS=Xenopus laevis GN=LOC446922 PE=2 SV=1	446	0.5	1	0.5	1	0.5	0	0.75	0.75	1	0	1	0
tr|Q66KS4|Q66KS4_XENLA	59		0	0	LOC446922	LOC446922 protein (Fragment) OS=Xenopus laevis GN=LOC446922 PE=2 SV=1	448	0.5	1	0.5	1	0.5	0	0.75	0.75	1	0	1	0
tr|Q7ZWP4|Q7ZWP4_XENLA	59		0	0	tubb4a	MGC53205 protein OS=Xenopus laevis GN=tubb4a PE=2 SV=1	444	0.5	1	0.5	1	0.5	0	0.75	0.75	1	0	1	0
tr|Q7ZY50|Q7ZY50_XENLA	59		0	0		MGC53997 protein OS=Xenopus laevis PE=2 SV=1	445	0.5	1	0.5	1	0.5	0	0.75	0.75	1	0	1	0
tr|Q4V812|Q4V812_XENLA	119		0	0	LOC403373	LOC403373 protein (Fragment) OS=Xenopus laevis GN=LOC403373 PE=2 SV=1	492	2	2	1	3	0.5	1	2	2	1	0	1	0
tr|Q641A9|Q641A9_XENLA	119		0	0	LOC403373	LOC403373 protein (Fragment) OS=Xenopus laevis GN=LOC403373 PE=2 SV=1	555	2	2	1	3	0.5	1	2	2	1	0	1	0
tr|Q6DTN6|Q6DTN6_XENLA	155		0	0	ppia	Peptidyl-prolyl cis-trans isomerase OS=Xenopus laevis GN=ppia PE=2 SV=1	164	1	0	1	0	0.5	0	0.5	0.5	1	0	1	0
tr|Q6NUH4|Q6NUH4_XENLA	155		0	0	CypA	Peptidyl-prolyl cis-trans isomerase (Fragment) OS=Xenopus laevis GN=CypA PE=2 SV=1	192	1	0	1	0	0.5	0	0.5	0.5	1	0	1	0
tr|Q7SZ12|Q7SZ12_XENLA	155		0	0	CypA	Peptidyl-prolyl cis-trans isomerase (Fragment) OS=Xenopus laevis GN=CypA PE=2 SV=1	193	1	0	1	0	0.5	0	0.5	0.5	1	0	1	0
tr|A1A5J8|A1A5J8_XENLA	210		0	0	smarcd1	Smarcd1 protein OS=Xenopus laevis GN=smarcd1 PE=2 SV=1	507	0.5	1	0.5	1	0.5	0	0.75	0.75	1	0	1	0
tr|Q505N3|Q505N3_XENLA	210		0	0	Smarcd1	Smarcd1 protein (Fragment) OS=Xenopus laevis GN=Smarcd1 PE=2 SV=1	496	0.5	1	0.5	1	0.5	0	0.75	0.75	1	0	1	0
tr|Q66J25|Q66J25_XENLA	210		0	0	Smarcd1	Smarcd1 protein (Fragment) OS=Xenopus laevis GN=Smarcd1 PE=2 SV=1	504	0.5	1	0.5	1	0.5	0	0.75	0.75	1	0	1	0
tr|Q6DCP7|Q6DCP7_XENLA	210		0	0	Smarcd1	Smarcd1 protein (Fragment) OS=Xenopus laevis GN=Smarcd1 PE=2 SV=1	513	0.5	1	0.5	1	0.5	0	0.75	0.75	1	0	1	0
tr|Q7ZXG1|Q7ZXG1_XENLA	210		0	0	Smarcd1	Smarcd1 protein (Fragment) OS=Xenopus laevis GN=Smarcd1 PE=2 SV=1	481	0.5	1	0.5	1	0.5	0	0.75	0.75	1	0	1	0
tr|Q4V835|Q4V835_XENLA	60	C	2	79	hells	HELLS protein OS=Xenopus laevis GN=hells PE=2 SV=1	838	16	11	11	15	15	13	13.5	13	0.962963	-0.0544478	0.890844	0.0501984
tr|D2JYR7|D2JYR7_XENLA	31	C	58	0	fanci	Fanconi anemia complementation group I transcript variant 1 OS=Xenopus laevis GN=fanci PE=2 SV=1	1337	8	12	10	9	12	7	10	9.5	0.95	-0.0740006	0.845028	0.0731287
tr|Q32NN1|Q32NN1_XENLA	15	C	43	0	recql	MGC131022 protein OS=Xenopus laevis GN=recql PE=2 SV=1	652	8	8	7	8	9	9	8	7.5	0.9375	-0.0931094	0.5	0.30103
sp|Q8AVH1|RBBP7_XENLA	104	C	18	7	rbbp7	Histone-binding protein RBBP7 OS=Xenopus laevis GN=rbbp7 PE=2 SV=1	425	3	6	3	5	5	3	4.5	4	0.888889	-0.169925	0.810892	0.0910368
tr|Q6GQH7|Q6GQH7_XENLA	11		0	0		Uncharacterized protein (Fragment) OS=Xenopus laevis PE=2 SV=1	525	5	4	5	3	3	3	4.5	4	0.888889	-0.169925	0.711723	0.147689
tr|Q5U4U8|Q5U4U8_XENLA	81	C	42	0	LOC495429	LOC495429 protein (Fragment) OS=Xenopus laevis GN=LOC495429 PE=2 SV=1	1378	7	8	5	8	8	6	7.5	6.5	0.866667	-0.206451	0.62483	0.204238
tr|Q91624|Q91624_XENLA	42		0	0	hsc70.I	Heat shock cognate 70.I OS=Xenopus laevis GN=hsc70.I PE=2 SV=1	645	10	10	9	8	10	8	10	8.5	0.85	-0.234465	0.204833	0.688601
sp|P53505|ACT5_XENLA	55	C	0	16		Actin, cytoplasmic type 5 OS=Xenopus laevis PE=3 SV=1	376	6	7	5	6	4	7	6.5	5.5	0.846154	-0.241008	0.292893	0.533291
sp|A2BDB0|ACTG_XENLA	55		0	0	actg1	Actin, cytoplasmic 2 OS=Xenopus laevis GN=actg1 PE=2 SV=1	375	6	7	5	6	4	7	6.5	5.5	0.846154	-0.241008	0.292893	0.533291
sp|O93400|ACTB_XENLA	55		0	0	actb	Actin, cytoplasmic 1 OS=Xenopus laevis GN=actb PE=2 SV=1	375	6	7	5	6	4	7	6.5	5.5	0.846154	-0.241008	0.292893	0.533291
sp|P15475|ACTB_XENBO	55		0	0	actb	Actin, cytoplasmic 1 OS=Xenopus borealis GN=actb PE=3 SV=1	376	6	7	5	6	4	7	6.5	5.5	0.846154	-0.241008	0.292893	0.533291
sp|P53506|ACT8_XENLA	55		0	0		Actin, cytoplasmic type 8 OS=Xenopus laevis PE=3 SV=1	376	6	7	5	6	4	7	6.5	5.5	0.846154	-0.241008	0.292893	0.533291
tr|Q32NP0|Q32NP0_XENLA	55		0	0	actg1	MGC131002 protein OS=Xenopus laevis GN=actg1 PE=2 SV=1	376	6	7	5	6	4	7	6.5	5.5	0.846154	-0.241008	0.292893	0.533291
sp|Q9W602|SSRP1_XENLA	46	C	43	11	ssrp1	FACT complex subunit SSRP1 OS=Xenopus laevis GN=ssrp1 PE=1 SV=1	693	9	10	7	9	11	8	9.5	8	0.842105	-0.247928	0.349886	0.456074
sp|P70094|H2AZL_XENLA	18	C	0	11	h2a.zl1	Histone H2A.Z-like OS=Xenopus laevis GN=h2a.zl1 PE=2 SV=3	128	3	3	2	3	4	3	3	2.5	0.833333	-0.263034	0.5	0.30103
tr|Q5HZZ9|Q5HZZ9_XENLA	18		0	0	LOC397949	Histone H2A OS=Xenopus laevis GN=LOC397949 PE=2 SV=1	105	3	3	2	3	4	3	3	2.5	0.833333	-0.263034	0.5	0.30103
sp|P06897|H2A1_XENLA	18	C	0	16		Histone H2A type 1 OS=Xenopus laevis PE=1 SV=2	130	3	3	3	2	3	2	3	2.5	0.833333	-0.263034	0.5	0.30103
tr|Q6AZS1|Q6AZS1_XENLA	18		0	0	hist1h2ad	Histone H2A OS=Xenopus laevis GN=hist1h2ad PE=2 SV=1	130	3	3	3	2	3	2	3	2.5	0.833333	-0.263034	0.5	0.30103
sp|Q91883|GRP78_XENLA	42		0	0	hspa5	78 kDa glucose-regulated protein OS=Xenopus laevis GN=hspa5 PE=2 SV=1	658	3	3	3	2	3	2	3	2.5	0.833333	-0.263034	0.5	0.30103
tr|Q6DD68|Q6DD68_XENLA	42		0	0	LOC397850	LOC397850 protein OS=Xenopus laevis GN=LOC397850 PE=2 SV=1	658	3	3	3	2	3	2	3	2.5	0.833333	-0.263034	0.5	0.30103
tr|Q8AVE3|Q8AVE3_XENLA	42		0	0	hspa5	Hspa5 protein OS=Xenopus laevis GN=hspa5 PE=2 SV=1	655	3	3	3	2	3	2	3	2.5	0.833333	-0.263034	0.5	0.30103
tr|Q91688|Q91688_XENLA	42		0	0	BiP/Grp78	Immunoglobulin binding protein OS=Xenopus laevis GN=BiP/Grp78 PE=2 SV=1	658	3	3	3	2	3	2	3	2.5	0.833333	-0.263034	0.5	0.30103
tr|Q802C4|Q802C4_XENLA	69	C	15	0	brd7	BRD7 protein OS=Xenopus laevis GN=brd7 PE=2 SV=1	638	3	3	3	2	3	1	3	2.5	0.833333	-0.263034	0.5	0.30103
tr|Q52L33|Q52L33_XENLA	210	C	2	0	smarcd3	MGC115001 protein OS=Xenopus laevis GN=smarcd3 PE=2 SV=1	369	1	2	0.5	2	2	1	1.5	1.25	0.833333	-0.263034	0.810892	0.0910368
sp|P25979|UBF1A_XENLA	105	C	13	0	ubtf-a	Nucleolar transcription factor 1-A OS=Xenopus laevis GN=ubtf-a PE=2 SV=1	677	10	12	7	11	14	11	11	9	0.818182	-0.289507	0.493133	0.307036
tr|Q640G9|Q640G9_XENLA	37	C	63	0	hcfc1	LOC494675 protein OS=Xenopus laevis GN=hcfc1 PE=2 SV=1	2101	9	13	7	11	13	10	11	9	0.818182	-0.289507	0.552786	0.257443
sp|P25980|UBF1B_XENLA	105	C	0	64	ubtf-b	Nucleolar transcription factor 1-B OS=Xenopus laevis GN=ubtf-b PE=2 SV=1	701	11	11	7	11	13	11	11	9	0.818182	-0.289507	0.5	0.30103
tr|Q8AVJ8|Q8AVJ8_XENLA	105		0	0	ubtf-b	Ubtf-b protein OS=Xenopus laevis GN=ubtf-b PE=2 SV=1	701	11	11	7	11	13	11	11	9	0.818182	-0.289507	0.5	0.30103
tr|A9JS62|A9JS62_XENLA	159	C	6	0	LOC100127317	LOC100127317 protein (Fragment) OS=Xenopus laevis GN=LOC100127317 PE=2 SV=1	580	0.5	2	2	0	1	1	1.25	1	0.8	-0.321928	0.861242	0.0648746
sp|P17507|EF1A2_XENLA	173	C	5	9	eef1ao	Elongation factor 1-alpha, oocyte form OS=Xenopus laevis GN=eef1ao PE=1 SV=1	461	2	3	1	3	3	2	2.5	2	0.8	-0.321928	0.711723	0.147689
sp|P17508|EF1A3_XENLA	173	C	0	5		Elongation factor 1-alpha, oocyte form OS=Xenopus laevis PE=1 SV=2	461	2	3	2	2	3	2	2.5	2	0.8	-0.321928	0.5	0.30103
tr|Q7SYT0|Q7SYT0_XENLA	173		0	0	eef1a2	Elongation factor 1-alpha OS=Xenopus laevis GN=eef1a2 PE=2 SV=1	463	2	3	2	2	3	2	2.5	2	0.8	-0.321928	0.5	0.30103
tr|Q7ZXA2|Q7ZXA2_XENLA	173		0	0	eef1a-o1	Elongation factor 1-alpha OS=Xenopus laevis GN=eef1a-o1 PE=2 SV=1	461	2	3	2	2	3	2	2.5	2	0.8	-0.321928	0.5	0.30103
tr|Q6B827|Q6B827_XENLA	67		0	0		Histone H4 (Fragment) OS=Xenopus laevis PE=3 SV=1	43	3	2	2	2	2	2	2.5	2	0.8	-0.321928	0.5	0.30103
tr|Q66IP7|Q66IP7_XENLA	210	C	6	6	smarcd2	MGC86299 protein OS=Xenopus laevis GN=smarcd2 PE=2 SV=1	465	2	3	1	3	2	1	2.5	2	0.8	-0.321928	0.711723	0.147689
tr|Q5MMR9|Q5MMR9_XENLA	78	C	0	38		Brg1 OS=Xenopus laevis PE=2 SV=1	1600	7	7	5	6	8	5	7	5.5	0.785714	-0.347923	0.204833	0.688601
tr|Q4VQ79|Q4VQ79_XENLA	78		0	0	smarca4	Brg1 OS=Xenopus laevis GN=smarca4 PE=2 SV=1	1600	7	7	5	6	8	5	7	5.5	0.785714	-0.347923	0.204833	0.688601
tr|Q8AVE2|Q8AVE2_XENLA	42		0	0	hspa1l	Hsc70 protein OS=Xenopus laevis GN=hspa1l PE=2 SV=1	650	16	16	13	12	17	13	16	12.5	0.78125	-0.356144	0.0903345	1.04415
sp|P02827|HSP70_XENLA	42	C	0	24		Heat shock 70 kDa protein OS=Xenopus laevis PE=2 SV=1	647	5	4	4	3	5	3	4.5	3.5	0.777778	-0.36257	0.292893	0.533291
tr|Q6DCD3|Q6DCD3_XENLA	42		0	0	hsp70	Hsp70 protein OS=Xenopus laevis GN=hsp70 PE=2 SV=1	647	5	4	4	3	5	3	4.5	3.5	0.777778	-0.36257	0.292893	0.533291
tr|Q6GMF1|Q6GMF1_XENLA	42		0	0	hspa2	MGC81782 protein OS=Xenopus laevis GN=hspa2 PE=2 SV=1	634	5	4	4	3	5	2	4.5	3.5	0.777778	-0.36257	0.292893	0.533291
tr|Q7ZXS2|Q7ZXS2_XENLA	61		0	0	LOC398512	DNA topoisomerase 2 (Fragment) OS=Xenopus laevis GN=LOC398512 PE=2 SV=1	1132	31	31	22	26	29	30	31	24	0.774194	-0.369234	0.177171	0.751607
tr|Q7ZTK6|Q7ZTK6_XENLA	42	C	0	68	hspa8	MGC53952 protein OS=Xenopus laevis GN=hspa8 PE=2 SV=1	646	17	17	13	13	18	13	17	13	0.764706	-0.387023	#DIV/0!	#DIV/0!
tr|Q91993|Q91993_XENLA	42		0	0	hsc70.II	Heat shock cognate 70.II OS=Xenopus laevis GN=hsc70.II PE=2 SV=1	647	17	17	13	13	17	12	17	13	0.764706	-0.387023	#DIV/0!	#DIV/0!
tr|Q6INC9|Q6INC9_XENLA	18		0	0	h2afj	Histone H2A OS=Xenopus laevis GN=h2afj PE=2 SV=1	126	2	2	1	2	3	2	2	1.5	0.75	-0.415037	0.5	0.30103
sp|Q6GM74|H2AV_XENLA	18		0	0	h2afv	Histone H2A.V OS=Xenopus laevis GN=h2afv PE=2 SV=3	128	2	2	1	2	2	2	2	1.5	0.75	-0.415037	0.5	0.30103
tr|Q4KLX2|Q4KLX2_XENLA	46		0	0	raph1	MGC114656 protein OS=Xenopus laevis GN=raph1 PE=2 SV=1	365	2	2	1	2	2	2	2	1.5	0.75	-0.415037	0.5	0.30103
sp|Q7ZYS8|RL10A_XENLA	52	C	0	10	rpl10a	60S ribosomal protein L10a OS=Xenopus laevis GN=rpl10a PE=2 SV=1	217	2	2	1	2	2	1	2	1.5	0.75	-0.415037	0.5	0.30103
tr|Q6EE54|Q6EE54_XENLA	52		0	0		Ribosomal protein (Fragment) OS=Xenopus laevis PE=2 SV=1	184	2	2	1	2	2	1	2	1.5	0.75	-0.415037	0.5	0.30103
sp|Q4V7H8|BORE2_XENLA	234	C	10	0	cdca9	Borealin-2 OS=Xenopus laevis GN=cdca9 PE=1 SV=1	296	2	2	1	2	2	1	2	1.5	0.75	-0.415037	0.5	0.30103
tr|Q7ZWY6|Q7ZWY6_XENLA	160	C	5	0	rpl9	Rpl9-prov protein OS=Xenopus laevis GN=rpl9 PE=2 SV=1	192	1	1	0.5	1	2	0	1	0.75	0.75	-0.415037	0.5	0.30103
tr|Q6AZP5|Q6AZP5_XENLA	49		0	0	rpa3-prov	Rpa3-prov protein OS=Xenopus laevis GN=rpa3-prov PE=2 SV=1	121	1	1	0.5	1	1	1	1	0.75	0.75	-0.415037	0.5	0.30103
tr|Q6IP16|Q6IP16_XENLA	91	C	4	0	dnttip1	MGC79023 protein OS=Xenopus laevis GN=dnttip1 PE=2 SV=1	309	1	1	0.5	1	1	0	1	0.75	0.75	-0.415037	0.5	0.30103
tr|Q6NRK0|Q6NRK0_XENLA	127	C	4	0	asap2	MGC83760 protein OS=Xenopus laevis GN=asap2 PE=2 SV=1	1029	1	1	0.5	1	1	0	1	0.75	0.75	-0.415037	0.5	0.30103
sp|P63282|UBC9_XENLA	187	C	5	0	ube2i	SUMO-conjugating enzyme UBC9 OS=Xenopus laevis GN=ube2i PE=1 SV=1	158	1	1	0.5	1	1	1	1	0.75	0.75	-0.415037	0.5	0.30103
sp|Q6GPL3|AUKBB_XENLA	80		0	0	aurkb-b	Aurora kinase B-B OS=Xenopus laevis GN=aurkb-b PE=2 SV=1	368	1	1	0.5	1	0.5	2	1	0.75	0.75	-0.415037	0.5	0.30103
tr|Q6GQ55|Q6GQ55_XENLA	94		0	0	LOC443589	LOC443589 protein (Fragment) OS=Xenopus laevis GN=LOC443589 PE=2 SV=1	444	2	0	0.5	1	0.5	0	1	0.75	0.75	-0.415037	0.845028	0.0731287
tr|Q6DE09|Q6DE09_XENLA	161	C	3	0	eif4enif1	Eif4enif1-prov protein OS=Xenopus laevis GN=eif4enif1 PE=2 SV=1	771	2	0	0.5	1	0.5	0	1	0.75	0.75	-0.415037	0.845028	0.0731287
sp|Q283Q6|DBF4B_XENLA	170	C	0	3	dbf4b	Protein DBF4 homolog B OS=Xenopus laevis GN=dbf4b PE=1 SV=1	784	1	1	0.5	1	0.5	0	1	0.75	0.75	-0.415037	0.5	0.30103
tr|B3DLM6|B3DLM6_XENLA	170		0	0	dbf4	Dbf4 protein OS=Xenopus laevis GN=dbf4 PE=2 SV=1	784	1	1	0.5	1	0.5	0	1	0.75	0.75	-0.415037	0.5	0.30103
tr|Q6GPW8|Q6GPW8_XENLA	186		0	0	kat7	Histone acetyltransferase OS=Xenopus laevis GN=kat7 PE=2 SV=1	617	1	1	0.5	1	0.5	0	1	0.75	0.75	-0.415037	0.5	0.30103
tr|Q6PCK3|Q6PCK3_XENLA	186		0	0		Histone acetyltransferase OS=Xenopus laevis PE=2 SV=1	535	1	1	0.5	1	0.5	0	1	0.75	0.75	-0.415037	0.5	0.30103
tr|Q6DKB4|Q6DKB4_XENLA	243	C	0	3	MGC84691	MGC84691 protein OS=Xenopus laevis GN=MGC84691 PE=2 SV=1	536	1	1	0.5	1	0.5	0	1	0.75	0.75	-0.415037	0.5	0.30103
tr|Q7ZXQ2|Q7ZXQ2_XENLA	243		0	0	fus	Fus protein OS=Xenopus laevis GN=fus PE=2 SV=1	536	1	1	0.5	1	0.5	0	1	0.75	0.75	-0.415037	0.5	0.30103
tr|Q6INT0|Q6INT0_XENLA	61	C	33	169	top2a	DNA topoisomerase 2 OS=Xenopus laevis GN=top2a PE=2 SV=1	1579	39	37	25	31	36	34	38	28	0.736842	-0.440573	0.157758	0.802008
tr|A1L3K5|A1L3K5_XENLA	42		0	0	hspa1b	LOC100037033 protein OS=Xenopus laevis GN=hspa1b PE=2 SV=1	646	15	14	11	10	15	10	14.5	10.5	0.724138	-0.465664	0.0298575	1.52495
tr|Q2TAV4|Q2TAV4_XENLA	94	C	7	3	prpf3	LOC443589 protein OS=Xenopus laevis GN=prpf3 PE=2 SV=1	679	5	0	0.5	3	1	1	2.5	1.75	0.7	-0.514573	0.821226	0.0855373
sp|Q8QFR2|HIRA_XENLA	50	C	65	5	hira	Protein HIRA OS=Xenopus laevis GN=hira PE=1 SV=2	1013	13	12	8	9	16	12	12.5	8.5	0.68	-0.556393	0.0298575	1.52495
tr|Q7ZTJ3|Q7ZTJ3_XENLA	113		0	0		MGC53832 protein OS=Xenopus laevis PE=2 SV=1	698	0.5	1	1	0	1	1	0.75	0.5	0.666667	-0.584963	0.711723	0.147689
tr|Q7ZTQ2|Q7ZTQ2_XENLA	113		0	0	acsl1	Facl2 protein OS=Xenopus laevis GN=acsl1 PE=2 SV=1	698	0.5	1	1	0	1	1	0.75	0.5	0.666667	-0.584963	0.711723	0.147689
tr|Q7ZY06|Q7ZY06_XENLA	136	C	3	0	u2af2	U2af2 protein OS=Xenopus laevis GN=u2af2 PE=2 SV=2	456	0.5	1	1	0	1	0	0.75	0.5	0.666667	-0.584963	0.711723	0.147689
tr|A0JMR8|A0JMR8_XENLA	312	C	4	0	dhx33	Dhx33 protein OS=Xenopus laevis GN=dhx33 PE=2 SV=1	266	0.5	1	1	0	1	1	0.75	0.5	0.666667	-0.584963	0.711723	0.147689
tr|Q6NRJ3|Q6NRJ3_XENLA	320	C	4	0	exosc10	MGC83774 protein OS=Xenopus laevis GN=exosc10 PE=2 SV=1	883	0.5	1	1	0	1	1	0.75	0.5	0.666667	-0.584963	0.711723	0.147689
sp|Q6DDV8|TPX2B_XENLA	41	C	1	0	tpx2-b	Targeting protein for Xklp2-B OS=Xenopus laevis GN=tpx2-b PE=2 SV=1	715	0.5	1	1	0	0.5	0	0.75	0.5	0.666667	-0.584963	0.711723	0.147689
sp|Q5XGU5|DNJ6B_XENLA	151	C	0	2	dnajb6-b	DnaJ homolog subfamily B member 6-B OS=Xenopus laevis GN=dnajb6-b PE=2 SV=1	245	0.5	1	1	0	0.5	0	0.75	0.5	0.666667	-0.584963	0.711723	0.147689
sp|Q5FWN8|DNJ6A_XENLA	151		0	0	dnajb6-a	DnaJ homolog subfamily B member 6-A OS=Xenopus laevis GN=dnajb6-a PE=2 SV=1	250	0.5	1	1	0	0.5	0	0.75	0.5	0.666667	-0.584963	0.711723	0.147689
tr|Q6INX5|Q6INX5_XENLA	29		0	0	smarcc2	MGC80068 protein OS=Xenopus laevis GN=smarcc2 PE=2 SV=1	1109	2	4	1	3	4	2	3	2	0.666667	-0.584963	0.552786	0.257443
tr|Q71QG2|Q71QG2_XENLA	233	C	1	0		PIAS OS=Xenopus laevis PE=2 SV=1	499	2	1	1	1	2	3	1.5	1	0.666667	-0.584963	0.5	0.30103
tr|Q7ZXT1|Q7ZXT1_XENLA	79	C	7	0	LOC398513	LOC398513 protein (Fragment) OS=Xenopus laevis GN=LOC398513 PE=2 SV=1	407	2	1	1	1	1	1	1.5	1	0.666667	-0.584963	0.5	0.30103
tr|Q2TAS5|Q2TAS5_XENLA	83	C	7	0	trim28	MGC130965 protein OS=Xenopus laevis GN=trim28 PE=2 SV=1	677	2	1	1	1	1	1	1.5	1	0.666667	-0.584963	0.5	0.30103
tr|Q6INF9|Q6INF9_XENLA	141	C	6	0	gtf2h4	MGC83106 protein OS=Xenopus laevis GN=gtf2h4 PE=2 SV=1	455	2	1	1	1	1	0	1.5	1	0.666667	-0.584963	0.5	0.30103
sp|P15308|B4_XENLA	180	C	0	6	b4	Protein B4 OS=Xenopus laevis GN=b4 PE=1 SV=1	273	1	2	1	1	1	0	1.5	1	0.666667	-0.584963	0.5	0.30103
tr|Q5XHJ2|Q5XHJ2_XENLA	180		0	0	h1foo	B4 protein OS=Xenopus laevis GN=h1foo PE=2 SV=1	283	1	2	1	1	1	0	1.5	1	0.666667	-0.584963	0.5	0.30103
tr|Q3B8M5|Q3B8M5_XENLA	228	C	0	7	XNop56	XNop56 protein OS=Xenopus laevis GN=XNop56 PE=2 SV=1	529	2	1	1	1	1	1	1.5	1	0.666667	-0.584963	0.5	0.30103
tr|Q4V7X3|Q4V7X3_XENLA	228		0	0	XNop56	XNop56 protein (Fragment) OS=Xenopus laevis GN=XNop56 PE=2 SV=1	510	2	1	1	1	1	1	1.5	1	0.666667	-0.584963	0.5	0.30103
tr|Q90W60|Q90W60_XENLA	228		0	0	nop56	XNop56 protein OS=Xenopus laevis GN=nop56 PE=2 SV=1	532	2	1	1	1	1	1	1.5	1	0.666667	-0.584963	0.5	0.30103
tr|A1L2X9|A1L2X9_XENLA	163	C	5	0	LOC100036984	LOC100036984 protein (Fragment) OS=Xenopus laevis GN=LOC100036984 PE=2 SV=1	772	2	1	1	1	0.5	0	1.5	1	0.666667	-0.584963	0.5	0.30103
tr|Q6GPV9|Q6GPV9_XENLA	134		0	0	hsp90aa1.1	MGC82579 protein OS=Xenopus laevis GN=hsp90aa1.1 PE=2 SV=1	729	2	2	0.5	2	2	0	2	1.25	0.625	-0.678072	0.5	0.30103
sp|O93479|ORC4_XENLA	194	C	0	11	orc4	Origin recognition complex subunit 4 OS=Xenopus laevis GN=orc4 PE=2 SV=1	432	3	1	0.5	2	2	3	2	1.25	0.625	-0.678072	0.613571	0.212135
tr|Q3B8I2|Q3B8I2_XENLA	194		0	0	orc4	Origin recognition complex subunit 4 OS=Xenopus laevis GN=orc4 PE=2 SV=1	432	3	1	0.5	2	2	3	2	1.25	0.625	-0.678072	0.613571	0.212135
tr|Q6PGT4|Q6PGT4_XENLA	146		0	0	set	MGC64240 protein OS=Xenopus laevis GN=set PE=2 SV=1	278	2	2	0.5	2	1	2	2	1.25	0.625	-0.678072	0.5	0.30103
tr|Q7ZY22|Q7ZY22_XENLA	29	C	16	16	smarcc1	Smarcc1 protein OS=Xenopus laevis GN=smarcc1 PE=2 SV=2	1226	8	5	3	5	6	5	6.5	4	0.615385	-0.70044	0.316379	0.499792
tr|Q7SYZ5|Q7SYZ5_XENLA	74	C	0	3	Hdac2	Hdac2 protein (Fragment) OS=Xenopus laevis GN=Hdac2 PE=2 SV=1	447	3	2	1	2	2	2	2.5	1.5	0.6	-0.736966	0.292893	0.533291
tr|Q66J55|Q66J55_XENLA	74		0	0	hdac2	Histone deacetylase OS=Xenopus laevis GN=hdac2 PE=2 SV=1	488	3	2	1	2	2	2	2.5	1.5	0.6	-0.736966	0.292893	0.533291
tr|Q68F48|Q68F48_XENLA	138	C	0	13	LOC446279	LOC446279 protein (Fragment) OS=Xenopus laevis GN=LOC446279 PE=2 SV=1	479	3	2	1	2	2	3	2.5	1.5	0.6	-0.736966	0.292893	0.533291
tr|Q2KHQ3|Q2KHQ3_XENLA	138		0	0	daxx	LOC446279 protein OS=Xenopus laevis GN=daxx PE=2 SV=1	916	3	2	1	2	2	3	2.5	1.5	0.6	-0.736966	0.292893	0.533291
sp|Q7SZ22|SUMO3_XENLA	302	C	1	3	sumo3	Small ubiquitin-related modifier 3 OS=Xenopus laevis GN=sumo3 PE=3 SV=1	94	0.5	2	0.5	1	1	0	1.25	0.75	0.6	-0.736966	0.62483	0.204238
tr|Q6AZH8|Q6AZH8_XENLA	42		0	0	hspa1a	Uncharacterized protein OS=Xenopus laevis GN=hspa1a PE=2 SV=1	652	12	10	7	6	9	6	11	6.5	0.590909	-0.758992	0.0917103	1.03758
tr|Q6AZV1|Q6AZV1_XENLA	134	C	3	10	hsp90ab1	Hsp90beta OS=Xenopus laevis GN=hsp90ab1 PE=2 SV=1	722	4	2	0.5	3	3	1	3	1.75	0.583333	-0.777608	0.520019	0.283981
sp|Q9W758|CTBP2_XENLA	21	C	4	0	ctbp2	C-terminal-binding protein 2 OS=Xenopus laevis GN=ctbp2 PE=1 SV=1	437	1	0	0.5	0	1	2	0.5	0.25	0.5	-1	0.711723	0.147689
sp|Q640I9|KDM2B_XENLA	88	C	2	0	kdm2b	Lysine-specific demethylase 2B OS=Xenopus laevis GN=kdm2b PE=2 SV=1	1259	1	0	0.5	0	1	0	0.5	0.25	0.5	-1	0.711723	0.147689
tr|Q561K7|Q561K7_XENLA	96	C	0	2	LOC733205	LOC733205 protein (Fragment) OS=Xenopus laevis GN=LOC733205 PE=2 SV=1	470	1	0	0.5	0	1	0	0.5	0.25	0.5	-1	0.711723	0.147689
tr|G4VV19|G4VV19_XENLA	96		0	0		Acid sensing ion channel 4 (Fragment) OS=Xenopus laevis PE=2 SV=1	535	1	0	0.5	0	1	0	0.5	0.25	0.5	-1	0.711723	0.147689
tr|Q66IN6|Q66IN6_XENLA	231		0	0	LOC446951	LOC446951 protein (Fragment) OS=Xenopus laevis GN=LOC446951 PE=2 SV=1	1042	1	0	0.5	0	1	1	0.5	0.25	0.5	-1	0.711723	0.147689
sp|Q5FWM3|SOX3B_XENLA	241	C	2	0	sox3-b	Transcription factor Sox-3-B OS=Xenopus laevis GN=sox3-b PE=2 SV=1	307	1	0	0.5	0	1	0	0.5	0.25	0.5	-1	0.711723	0.147689
sp|P19600|HNRPC_XENLA	319	C	0	3	hnrnpc	Heterogeneous nuclear ribonucleoprotein C OS=Xenopus laevis GN=hnrnpc PE=2 SV=1	282	1	0	0.5	0	1	1	0.5	0.25	0.5	-1	0.711723	0.147689
tr|Q8AVP9|Q8AVP9_XENLA	319		0	0		Hnrpc-prov protein OS=Xenopus laevis PE=2 SV=1	263	1	0	0.5	0	1	1	0.5	0.25	0.5	-1	0.711723	0.147689
sp|Q91819|AURAB_XENLA	80		0	0	aurka-b	Aurora kinase A-B OS=Xenopus laevis GN=aurka-b PE=2 SV=3	408	1	0	0.5	0	0.5	1	0.5	0.25	0.5	-1	0.711723	0.147689
sp|Q91820|AURAA_XENLA	80		0	0	aurka-a	Aurora kinase A-A OS=Xenopus laevis GN=aurka-a PE=1 SV=1	407	1	0	0.5	0	0.5	1	0.5	0.25	0.5	-1	0.711723	0.147689
tr|A0A060CPC3|A0A060CPC3_XENLA	80		0	0	aurka-b	Aurora kinase A-B (Fragment) OS=Xenopus laevis GN=aurka-b PE=2 SV=1	330	1	0	0.5	0	0.5	1	0.5	0.25	0.5	-1	0.711723	0.147689
tr|A0A060CUW4|A0A060CUW4_XENLA	80		0	0	aurka-b	Aurora kinase A-B (Fragment) OS=Xenopus laevis GN=aurka-b PE=2 SV=1	258	1	0	0.5	0	0.5	1	0.5	0.25	0.5	-1	0.711723	0.147689
sp|Q6GNJ8|VPS72_XENLA	92	C	1	0	vps72	Vacuolar protein sorting-associated protein 72 homolog OS=Xenopus laevis GN=vps72 PE=2 SV=1	353	1	0	0.5	0	0.5	0	0.5	0.25	0.5	-1	0.711723	0.147689
tr|Q6WSQ3|Q6WSQ3_XENLA	114	C	1	0	pole3	CHRAC17 protein OS=Xenopus laevis GN=pole3 PE=2 SV=1	147	1	0	0.5	0	0.5	0	0.5	0.25	0.5	-1	0.711723	0.147689
tr|A2BDC1|A2BDC1_XENLA	132	C	0	1	LOC494754	LOC494754 protein (Fragment) OS=Xenopus laevis GN=LOC494754 PE=2 SV=1	796	1	0	0.5	0	0.5	0	0.5	0.25	0.5	-1	0.711723	0.147689
tr|B2GTX8|B2GTX8_XENLA	132		0	0	LOC494754	LOC494754 protein OS=Xenopus laevis GN=LOC494754 PE=2 SV=1	774	1	0	0.5	0	0.5	0	0.5	0.25	0.5	-1	0.711723	0.147689
tr|Q2VPI0|Q2VPI0_XENLA	132		0	0	LOC494754	LOC494754 protein (Fragment) OS=Xenopus laevis GN=LOC494754 PE=2 SV=1	796	1	0	0.5	0	0.5	0	0.5	0.25	0.5	-1	0.711723	0.147689
tr|Q4V7Y5|Q4V7Y5_XENLA	132		0	0	LOC494754	LOC494754 protein (Fragment) OS=Xenopus laevis GN=LOC494754 PE=2 SV=1	798	1	0	0.5	0	0.5	0	0.5	0.25	0.5	-1	0.711723	0.147689
tr|Q52L29|Q52L29_XENLA	132		0	0	srrm1	LOC445881 protein OS=Xenopus laevis GN=srrm1 PE=2 SV=1	872	1	0	0.5	0	0.5	0	0.5	0.25	0.5	-1	0.711723	0.147689
tr|Q63ZQ5|Q63ZQ5_XENLA	132		0	0	LOC494754	LOC494754 protein (Fragment) OS=Xenopus laevis GN=LOC494754 PE=2 SV=1	796	1	0	0.5	0	0.5	0	0.5	0.25	0.5	-1	0.711723	0.147689
tr|Q6DD56|Q6DD56_XENLA	132		0	0	LOC445881	LOC445881 protein (Fragment) OS=Xenopus laevis GN=LOC445881 PE=2 SV=1	734	1	0	0.5	0	0.5	0	0.5	0.25	0.5	-1	0.711723	0.147689
tr|B7ZQY0|B7ZQY0_XENLA	150	C	0	1	LOC398655	Velo1 splice variant 1 OS=Xenopus laevis GN=LOC398655 PE=2 SV=1	779	1	0	0.5	0	0.5	0	0.5	0.25	0.5	-1	0.711723	0.147689
tr|Q7T226|Q7T226_XENLA	150		0	0	velo1	Velo1 OS=Xenopus laevis GN=velo1 PE=2 SV=1	779	1	0	0.5	0	0.5	0	0.5	0.25	0.5	-1	0.711723	0.147689
tr|Q5XH43|Q5XH43_XENLA	175	C	1	0	srsf12	LOC495068 protein OS=Xenopus laevis GN=srsf12 PE=2 SV=1	251	1	0	0.5	0	0.5	0	0.5	0.25	0.5	-1	0.711723	0.147689
tr|Q5XGV7|Q5XGV7_XENLA	189	C	1	0	ythdc1	LOC495129 protein OS=Xenopus laevis GN=ythdc1 PE=2 SV=1	704	1	0	0.5	0	0.5	0	0.5	0.25	0.5	-1	0.711723	0.147689
sp|Q7T0S2|NUDC1_XENLA	235	C	1	0	nudcd1	NudC domain-containing protein 1 OS=Xenopus laevis GN=nudcd1 PE=2 SV=1	586	1	0	0.5	0	0.5	0	0.5	0.25	0.5	-1	0.711723	0.147689
sp|Q4V862|CDK9A_XENLA	248	C	2	0	cdk9-a	Cyclin-dependent kinase 9-A OS=Xenopus laevis GN=cdk9-a PE=2 SV=1	376	1	0	0.5	0	0.5	1	0.5	0.25	0.5	-1	0.711723	0.147689
sp|Q6NUH0|RL31_XENLA	265	C	1	0	rpl31	60S ribosomal protein L31 OS=Xenopus laevis GN=rpl31 PE=2 SV=1	125	1	0	0.5	0	0.5	0	0.5	0.25	0.5	-1	0.711723	0.147689
tr|Q6NS25|Q6NS25_XENLA	281	C	1	0	ints2	MGC78791 protein OS=Xenopus laevis GN=ints2 PE=2 SV=1	1175	1	0	0.5	0	0.5	0	0.5	0.25	0.5	-1	0.711723	0.147689
sp|Q7T076|LSM11_XENLA	285	C	0	1	lsm11	U7 snRNA-associated Sm-like protein LSm11 OS=Xenopus laevis GN=lsm11 PE=2 SV=1	291	1	0	0.5	0	0.5	0	0.5	0.25	0.5	-1	0.711723	0.147689
tr|A2RV51|A2RV51_XENLA	285		0	0		Uncharacterized protein (Fragment) OS=Xenopus laevis PE=2 SV=1	294	1	0	0.5	0	0.5	0	0.5	0.25	0.5	-1	0.711723	0.147689
tr|Q0IH70|Q0IH70_XENLA	285		0	0	LSM11	LSM11 protein (Fragment) OS=Xenopus laevis GN=LSM11 PE=2 SV=1	297	1	0	0.5	0	0.5	0	0.5	0.25	0.5	-1	0.711723	0.147689
tr|Q3KPW8|Q3KPW8_XENLA	285		0	0	LSM11	LSM11 protein (Fragment) OS=Xenopus laevis GN=LSM11 PE=2 SV=1	292	1	0	0.5	0	0.5	0	0.5	0.25	0.5	-1	0.711723	0.147689
sp|A1L3I5|NSAPC_XENLA	296	C	0	1	nusap1-c	Nucleolar and spindle-associated protein 1-C OS=Xenopus laevis GN=nusap1-c PE=2 SV=2	525	1	0	0.5	0	0.5	0	0.5	0.25	0.5	-1	0.711723	0.147689
sp|Q1W1G1|NSAPA_XENLA	296		0	0	nusap1-a	Nucleolar and spindle-associated protein 1-A OS=Xenopus laevis GN=nusap1-a PE=1 SV=1	525	1	0	0.5	0	0.5	0	0.5	0.25	0.5	-1	0.711723	0.147689
tr|Q2VPG6|Q2VPG6_XENLA	303	C	0	1		Uncharacterized protein OS=Xenopus laevis PE=2 SV=1	671	1	0	0.5	0	0.5	0	0.5	0.25	0.5	-1	0.711723	0.147689
tr|Q2VPI2|Q2VPI2_XENLA	303		0	0	ewsr1	MGC132026 protein OS=Xenopus laevis GN=ewsr1 PE=2 SV=1	667	1	0	0.5	0	0.5	0	0.5	0.25	0.5	-1	0.711723	0.147689
tr|Q4QR27|Q4QR27_XENLA	303		0	0	LOC733270	LOC733270 protein (Fragment) OS=Xenopus laevis GN=LOC733270 PE=2 SV=1	666	1	0	0.5	0	0.5	0	0.5	0.25	0.5	-1	0.711723	0.147689
tr|Q90WJ2|Q90WJ2_XENLA	310	C	1	0	gnrhr	Gonadotropin-releasing hormone receptor type II OS=Xenopus laevis GN=gnrhr PE=2 SV=1	418	1	0	0.5	0	0.5	0	0.5	0.25	0.5	-1	0.711723	0.147689
tr|Q52KX4|Q52KX4_XENLA	317	C	1	0	MGC115008	MGC115008 protein OS=Xenopus laevis GN=MGC115008 PE=2 SV=1	873	1	0	0.5	0	0.5	0	0.5	0.25	0.5	-1	0.711723	0.147689
sp|P28020|CSK21_XENLA	327	C	0	1	csnk2a1	Casein kinase II subunit alpha OS=Xenopus laevis GN=csnk2a1 PE=2 SV=2	392	1	0	0.5	0	0.5	0	0.5	0.25	0.5	-1	0.711723	0.147689
tr|Q6INV5|Q6INV5_XENLA	327		0	0	csnk2a1	Ck2a1 protein OS=Xenopus laevis GN=csnk2a1 PE=2 SV=1	401	1	0	0.5	0	0.5	0	0.5	0.25	0.5	-1	0.711723	0.147689
tr|A0A068EUV4|A0A068EUV4_XENLA	330	C	0	1	slx4	Structure specific endonuclease subunit SLX4 OS=Xenopus laevis GN=slx4 PE=2 SV=1	1777	1	0	0.5	0	0.5	0	0.5	0.25	0.5	-1	0.711723	0.147689
tr|Q6INJ4|Q6INJ4_XENLA	330		0	0	LOC432277	LOC432277 protein (Fragment) OS=Xenopus laevis GN=LOC432277 PE=2 SV=1	1328	1	0	0.5	0	0.5	0	0.5	0.25	0.5	-1	0.711723	0.147689
tr|Q91803|Q91803_XENLA	335	C	1	0	nolc1	Nucleolar phosphoprotein OS=Xenopus laevis GN=nolc1 PE=2 SV=1	990	1	0	0.5	0	0.5	0	0.5	0.25	0.5	-1	0.711723	0.147689
tr|Q7ZY59|Q7ZY59_XENLA	341	C	0	1		Clk2-prov protein OS=Xenopus laevis PE=2 SV=1	491	1	0	0.5	0	0.5	0	0.5	0.25	0.5	-1	0.711723	0.147689
tr|Q3KPX3|Q3KPX3_XENLA	341		0	0	clk2	MGC131228 protein OS=Xenopus laevis GN=clk2 PE=2 SV=1	501	1	0	0.5	0	0.5	0	0.5	0.25	0.5	-1	0.711723	0.147689
sp|P52170|IMA5_XENLA	342	C	0	1	kpna1	Importin subunit alpha-5 OS=Xenopus laevis GN=kpna1 PE=1 SV=2	522	1	0	0.5	0	0.5	0	0.5	0.25	0.5	-1	0.711723	0.147689
tr|Q4QR45|Q4QR45_XENLA	342		0	0	kpna7	Importin subunit alpha OS=Xenopus laevis GN=kpna7 PE=2 SV=1	522	1	0	0.5	0	0.5	0	0.5	0.25	0.5	-1	0.711723	0.147689
tr|Q498J0|Q498J0_XENLA	347	C	0	1	LOC443677	LOC443677 protein (Fragment) OS=Xenopus laevis GN=LOC443677 PE=2 SV=1	491	1	0	0.5	0	0.5	0	0.5	0.25	0.5	-1	0.711723	0.147689
tr|Q6GN99|Q6GN99_XENLA	347		0	0	LOC443677	LOC443677 protein (Fragment) OS=Xenopus laevis GN=LOC443677 PE=2 SV=1	496	1	0	0.5	0	0.5	0	0.5	0.25	0.5	-1	0.711723	0.147689
tr|Q5XGV6|Q5XGV6_XENLA	348	C	1	0	trim24	LOC495130 protein OS=Xenopus laevis GN=trim24 PE=2 SV=1	439	1	0	0.5	0	0.5	0	0.5	0.25	0.5	-1	0.711723	0.147689
sp|Q6GMY9|XPO2_XENLA	2	C	20	0	cse1l	Exportin-2 OS=Xenopus laevis GN=cse1l PE=2 SV=1	971	5	3	2	2	5	3	4	2	0.5	-1	0.295167	0.529932
sp|O42227|HDA1B_XENLA	74	C	0	28	hdac1-b	Probable histone deacetylase 1-B OS=Xenopus laevis GN=hdac1-b PE=1 SV=1	480	6	6	2	4	5	5	6	3	0.5	-1	0.204833	0.688601
tr|Q7ZYT5|Q7ZYT5_XENLA	74		0	0	hdac1	Histone deacetylase OS=Xenopus laevis GN=hdac1 PE=2 SV=1	480	6	6	2	4	5	5	6	3	0.5	-1	0.204833	0.688601
tr|Q7ZY24|Q7ZY24_XENLA	140	C	15	0		Hmgb3-prov protein OS=Xenopus laevis PE=2 SV=1	202	4	2	2	1	4	2	3	1.5	0.5	-1	0.349886	0.456074
tr|O73820|O73820_XENLA	4		0	0		Mi-2 (Fragment) OS=Xenopus laevis PE=2 SV=1	410	1	1	1	0	3	0	1	0.5	0.5	-1	0.5	0.30103
sp|P06898|H2A2_XENLA	18		0	0		Histone H2A type 2 OS=Xenopus laevis PE=3 SV=3	130	2	2	1	1	2	1	2	1	0.5	-1	#DIV/0!	#DIV/0!
tr|Q6GPU5|Q6GPU5_XENLA	26	C	13	0	MGC82602	MGC82602 protein OS=Xenopus laevis GN=MGC82602 PE=2 SV=1	142	2	4	2	1	2	2	3	1.5	0.5	-1	0.349886	0.456074
tr|Q640I7|Q640I7_XENLA	233	C	1	9	pias4	LOC494663 protein OS=Xenopus laevis GN=pias4 PE=2 SV=1	501	2	2	1	1	2	2	2	1	0.5	-1	#DIV/0!	#DIV/0!
tr|A2BD79|A2BD79_XENLA	239	C	0	9	LOC733436	LOC733436 protein (Fragment) OS=Xenopus laevis GN=LOC733436 PE=2 SV=1	474	2	2	1	1	2	1	2	1	0.5	-1	#DIV/0!	#DIV/0!
tr|Q05AV9|Q05AV9_XENLA	239		0	0	LOC733436	LOC733436 protein (Fragment) OS=Xenopus laevis GN=LOC733436 PE=2 SV=1	450	2	2	1	1	2	1	2	1	0.5	-1	#DIV/0!	#DIV/0!
tr|Q2VPE9|Q2VPE9_XENLA	239		0	0	LOC733436	LOC733436 protein (Fragment) OS=Xenopus laevis GN=LOC733436 PE=2 SV=1	510	2	2	1	1	2	1	2	1	0.5	-1	#DIV/0!	#DIV/0!
tr|Q498G8|Q498G8_XENLA	192	C	0	4		Uncharacterized protein OS=Xenopus laevis PE=2 SV=1	454	1	1	1	0	1	0	1	0.5	0.5	-1	0.5	0.30103
tr|Q6DDF1|Q6DDF1_XENLA	192		0	0	gabpa	Gabpa-prov protein OS=Xenopus laevis GN=gabpa PE=2 SV=1	452	1	1	1	0	1	0	1	0.5	0.5	-1	0.5	0.30103
tr|Q6AZV6|Q6AZV6_XENLA	186	C	4	3	myst2	Histone acetyltransferase OS=Xenopus laevis GN=myst2 PE=2 SV=1	553	2	2	1	1	0.5	1	2	1	0.5	-1	#DIV/0!	#DIV/0!
sp|Q6GLW1|THO4B_XENLA	286	C	6	1	alyref-b	THO complex subunit 4-B OS=Xenopus laevis GN=alyref-b PE=2 SV=1	256	1	3	1	1	0.5	1	2	1	0.5	-1	0.5	0.30103
sp|Q8UVR5|BAZ1A_XENLA	253	C	12	0	baz1a	Bromodomain adjacent to zinc finger domain protein 1A (Fragment) OS=Xenopus laevis GN=baz1a PE=2 SV=1	627	3	2	0.5	2	3	2	2.5	1.25	0.5	-1	0.316379	0.499792
tr|Q9PVV6|Q9PVV6_XENLA	146	C	0	10	set	TAF-Ibeta1 OS=Xenopus laevis GN=set PE=2 SV=1	278	3	2	0.5	2	1	2	2.5	1.25	0.5	-1	0.316379	0.499792
tr|Q6INZ4|Q6INZ4_XENLA	146		0	0	MGC64240	MGC64240 protein OS=Xenopus laevis GN=MGC64240 PE=2 SV=1	278	3	2	0.5	2	1	2	2.5	1.25	0.5	-1	0.316379	0.499792
tr|Q9PVV5|Q9PVV5_XENLA	146		0	0		TAF-Ibeta2 OS=Xenopus laevis PE=2 SV=1	278	3	2	0.5	2	1	2	2.5	1.25	0.5	-1	0.316379	0.499792
tr|O93513|O93513_XENLA	70	C	0	7	orc3	Origin recognition complex associated protein p81 OS=Xenopus laevis GN=orc3 PE=2 SV=1	709	2	1	0.5	1	2	1	1.5	0.75	0.5	-1	0.349886	0.456074
tr|Q7ZTR4|Q7ZTR4_XENLA	70		0	0	orc3l	Orc3l protein OS=Xenopus laevis GN=orc3l PE=2 SV=1	709	2	1	0.5	1	2	1	1.5	0.75	0.5	-1	0.349886	0.456074
sp|P22232|FBRL_XENLA	76	C	0	7	fbl	rRNA 2'-O-methyltransferase fibrillarin OS=Xenopus laevis GN=fbl PE=2 SV=1	323	1	2	0.5	1	2	1	1.5	0.75	0.5	-1	0.349886	0.456074
tr|Q6GNA5|Q6GNA5_XENLA	76		0	0	LOC398434	LOC398434 protein OS=Xenopus laevis GN=LOC398434 PE=2 SV=1	323	1	2	0.5	1	2	1	1.5	0.75	0.5	-1	0.349886	0.456074
tr|Q7ZX93|Q7ZX93_XENLA	76		0	0	LOC398434	LOC398434 protein (Fragment) OS=Xenopus laevis GN=LOC398434 PE=2 SV=1	340	1	2	0.5	1	2	1	1.5	0.75	0.5	-1	0.349886	0.456074
tr|Q68EU5|Q68EU5_XENLA	63	C	0	7	tia1	MGC84540 protein OS=Xenopus laevis GN=tia1 PE=2 SV=1	389	2	1	0.5	1	1	2	1.5	0.75	0.5	-1	0.349886	0.456074
tr|Q6DEF1|Q6DEF1_XENLA	63		0	0		Uncharacterized protein OS=Xenopus laevis PE=2 SV=1	385	2	1	0.5	1	1	2	1.5	0.75	0.5	-1	0.349886	0.456074
tr|Q90WN0|Q90WN0_XENLA	63		0	0	tia-1	TIA-1 protein (Fragment) OS=Xenopus laevis GN=tia-1 PE=2 SV=1	388	2	1	0.5	1	1	2	1.5	0.75	0.5	-1	0.349886	0.456074
tr|I6N3H5|I6N3H5_XENLA	64	C	5	0	Rif1	Rif1 protein OS=Xenopus laevis GN=Rif1 PE=2 SV=1	2327	2	1	0.5	1	1	0	1.5	0.75	0.5	-1	0.349886	0.456074
sp|P20911|CDK7_XENLA	298	C	5	0	cdk7	Cyclin-dependent kinase 7 OS=Xenopus laevis GN=cdk7 PE=1 SV=1	352	2	1	0.5	1	1	0	1.5	0.75	0.5	-1	0.349886	0.456074
sp|Q6DE08|AUKBA_XENLA	80	C	1	5	aurkb-a	Aurora kinase B-A OS=Xenopus laevis GN=aurkb-a PE=1 SV=1	361	2	1	0.5	1	0.5	2	1.5	0.75	0.5	-1	0.349886	0.456074
tr|Q7ZX12|Q7ZX12_XENLA	95	C	4	0	gtf2h1	Gtf2h1-prov protein OS=Xenopus laevis GN=gtf2h1 PE=2 SV=1	532	2	1	0.5	1	0.5	0	1.5	0.75	0.5	-1	0.349886	0.456074
sp|Q91695|HDA1A_XENLA	74	C	1	0	hdac1-a	Probable histone deacetylase 1-A OS=Xenopus laevis GN=hdac1-a PE=1 SV=1	480	4	5	1	3	3	3	4.5	2	0.444444	-1.16993	0.198727	0.701742
tr|Q7ZYI5|Q7ZYI5_XENLA	142	C	15	0	actl6a	Baf53a-pending-prov protein OS=Xenopus laevis GN=actl6a PE=2 SV=1	429	3	4	2	1	3	2	3.5	1.5	0.428571	-1.22239	0.105573	0.976448
tr|Q7ZWN3|Q7ZWN3_XENLA	4	C	21	6	chd4	B230399n07 protein OS=Xenopus laevis GN=chd4 PE=2 SV=1	1893	7	5	3	2	10	0	6	2.5	0.416667	-1.26303	0.129048	0.889249
sp|Q91628|ORC2_XENLA	112	C	0	10	orc2	Origin recognition complex subunit 2 OS=Xenopus laevis GN=orc2 PE=2 SV=1	558	3	1	0.5	1	4	1	2	0.75	0.375	-1.41504	0.421436	0.375268
tr|Q5XGS9|Q5XGS9_XENLA	112		0	0	orc2	Orc2-a protein OS=Xenopus laevis GN=orc2 PE=2 SV=1	558	3	1	0.5	1	4	1	2	0.75	0.375	-1.41504	0.421436	0.375268
tr|Q4V7T0|Q4V7T0_XENLA	82	C	0	6	Mta2	Mta2 protein OS=Xenopus laevis GN=Mta2 PE=2 SV=1	669	2	2	0.5	1	1	0	2	0.75	0.375	-1.41504	0.125666	0.900782
tr|Q6AZP0|Q6AZP0_XENLA	82		0	0	MGC83056	MGC83056 protein OS=Xenopus laevis GN=MGC83056 PE=2 SV=1	672	2	2	0.5	1	1	0	2	0.75	0.375	-1.41504	0.125666	0.900782
tr|Q9PUN0|Q9PUN0_XENLA	82		0	0	mta2	Metastasis associated 1-like protein OS=Xenopus laevis GN=mta2 PE=2 SV=1	670	2	2	0.5	1	1	0	2	0.75	0.375	-1.41504	0.125666	0.900782
sp|O93377|RBP4A_XENLA	104		0	0	rbbp4-a	Histone-binding protein RBBP4-A OS=Xenopus laevis GN=rbbp4-a PE=1 SV=3	425	2	2	0.5	1	1	1	2	0.75	0.375	-1.41504	0.125666	0.900782
sp|Q6INH0|RBP4B_XENLA	104		0	0	rbbp4-b	Histone-binding protein RBBP4-B OS=Xenopus laevis GN=rbbp4-b PE=1 SV=3	425	2	2	0.5	1	1	1	2	0.75	0.375	-1.41504	0.125666	0.900782
tr|Q7ZXU4|Q7ZXU4_XENLA	107		0	0	krt8	Krt8 protein OS=Xenopus laevis GN=krt8 PE=2 SV=1	507	0.5	1	0.5	0	2	1	0.75	0.25	0.333333	-1.58496	0.292893	0.533291
sp|Q5XH16|NH2L1_XENLA	122	C	2	3	snu13	NHP2-like protein 1 OS=Xenopus laevis GN=snu13 PE=2 SV=1	128	0.5	1	0.5	0	2	2	0.75	0.25	0.333333	-1.58496	0.292893	0.533291
tr|Q6NUC7|Q6NUC7_XENLA	23	C	2	0		Uncharacterized protein OS=Xenopus laevis PE=2 SV=1	196	0.5	1	0.5	0	1	0	0.75	0.25	0.333333	-1.58496	0.292893	0.533291
tr|A0PGA0|A0PGA0_XENLA	60		0	0	edn3	Endothelin-3 OS=Xenopus laevis GN=edn3 PE=2 SV=1	201	0.5	1	0.5	0	1	0	0.75	0.25	0.333333	-1.58496	0.292893	0.533291
sp|P07222|NPM_XENLA	71	C	0	3	npm1	Nucleophosmin OS=Xenopus laevis GN=npm1 PE=1 SV=1	299	0.5	1	0.5	0	1	1	0.75	0.25	0.333333	-1.58496	0.292893	0.533291
tr|Q7SZ17|Q7SZ17_XENLA	71		0	0	MGC64305	MGC64305 protein OS=Xenopus laevis GN=MGC64305 PE=2 SV=1	299	0.5	1	0.5	0	1	1	0.75	0.25	0.333333	-1.58496	0.292893	0.533291
tr|Q7ZTP6|Q7ZTP6_XENLA	71		0	0	npm1	Npm1 protein OS=Xenopus laevis GN=npm1 PE=2 SV=1	300	0.5	1	0.5	0	1	1	0.75	0.25	0.333333	-1.58496	0.292893	0.533291
tr|Q91802|Q91802_XENLA	71		0	0		NO38 OS=Xenopus laevis PE=2 SV=1	296	0.5	1	0.5	0	1	1	0.75	0.25	0.333333	-1.58496	0.292893	0.533291
tr|Q7ZWY8|Q7ZWY8_XENLA	122		0	0	nhp2l1	Hoip-prov protein OS=Xenopus laevis GN=nhp2l1 PE=2 SV=1	128	0.5	1	0.5	0	1	1	0.75	0.25	0.333333	-1.58496	0.292893	0.533291
tr|Q4QQZ3|Q4QQZ3_XENLA	184	C	3	0	ppih	Peptidyl-prolyl cis-trans isomerase OS=Xenopus laevis GN=ppih PE=2 SV=1	177	0.5	1	0.5	0	1	1	0.75	0.25	0.333333	-1.58496	0.292893	0.533291
tr|Q6NRJ4|Q6NRJ4_XENLA	266	C	3	0	mcph1	MGC83773 protein OS=Xenopus laevis GN=mcph1 PE=2 SV=1	305	0.5	1	0.5	0	1	1	0.75	0.25	0.333333	-1.58496	0.292893	0.533291
tr|A8QZK6|A8QZK6_XENLA	325	C	0	2	xeco2	XEco2 OS=Xenopus laevis GN=xeco2 PE=2 SV=1	702	0.5	1	0.5	0	1	0	0.75	0.25	0.333333	-1.58496	0.292893	0.533291
tr|Q4KLP7|Q4KLP7_XENLA	325		0	0	esco2	MGC115718 protein OS=Xenopus laevis GN=esco2 PE=2 SV=1	640	0.5	1	0.5	0	1	0	0.75	0.25	0.333333	-1.58496	0.292893	0.533291
tr|Q91831|Q91831_XENLA	133	C	0	1		Alpha-tubulin OS=Xenopus laevis PE=2 SV=1	450	0.5	1	0.5	0	0.5	0	0.75	0.25	0.333333	-1.58496	0.292893	0.533291
tr|Q5U4V6|Q5U4V6_XENLA	133		0	0	LOC397931	LOC397931 protein OS=Xenopus laevis GN=LOC397931 PE=2 SV=1	450	0.5	1	0.5	0	0.5	0	0.75	0.25	0.333333	-1.58496	0.292893	0.533291
tr|Q6NRV3|Q6NRV3_XENLA	133		0	0	tuba1a	MGC81323 protein OS=Xenopus laevis GN=tuba1a PE=2 SV=1	450	0.5	1	0.5	0	0.5	0	0.75	0.25	0.333333	-1.58496	0.292893	0.533291
sp|Q52KV5|LEO1_XENLA	182	C	1	0	leo1	RNA polymerase-associated protein LEO1 OS=Xenopus laevis GN=leo1 PE=2 SV=1	703	0.5	1	0.5	0	0.5	0	0.75	0.25	0.333333	-1.58496	0.292893	0.533291
tr|Q6PI76|Q6PI76_XENLA	199	C	1	0	rps14	Rps14-prov protein OS=Xenopus laevis GN=rps14 PE=2 SV=1	151	0.5	1	0.5	0	0.5	0	0.75	0.25	0.333333	-1.58496	0.292893	0.533291
sp|P41512|TOP1_XENLA	200		0	0	top1	DNA topoisomerase 1 OS=Xenopus laevis GN=top1 PE=2 SV=1	829	0.5	1	0.5	0	0.5	0	0.75	0.25	0.333333	-1.58496	0.292893	0.533291
tr|Q08AX4|Q08AX4_XENLA	205	C	0	1	LOC100158394	LOC100158394 protein OS=Xenopus laevis GN=LOC100158394 PE=2 SV=1	555	0.5	1	0.5	0	0.5	0	0.75	0.25	0.333333	-1.58496	0.292893	0.533291
tr|B7ZQE1|B7ZQE1_XENLA	205		0	0	LOC398154	Mi-2 histone deacetylase complex protein 66 OS=Xenopus laevis GN=LOC398154 PE=2 SV=1	420	0.5	1	0.5	0	0.5	0	0.75	0.25	0.333333	-1.58496	0.292893	0.533291
tr|Q9PUM7|Q9PUM7_XENLA	205		0	0	gatad2a	Mi-2 histone deacetylase complex protein 66 OS=Xenopus laevis GN=gatad2a PE=2 SV=1	420	0.5	1	0.5	0	0.5	0	0.75	0.25	0.333333	-1.58496	0.292893	0.533291
tr|Q5EWX9|Q5EWX9_XENLA	206	C	0	1		Nuclear pore protein pom121 OS=Xenopus laevis PE=2 SV=1	1050	0.5	1	0.5	0	0.5	0	0.75	0.25	0.333333	-1.58496	0.292893	0.533291
tr|Q4KLR3|Q4KLR3_XENLA	206		0	0	MGC115599	MGC115599 protein OS=Xenopus laevis GN=MGC115599 PE=2 SV=1	902	0.5	1	0.5	0	0.5	0	0.75	0.25	0.333333	-1.58496	0.292893	0.533291
sp|Q68F18|MFN2B_XENLA	219	C	0	1	slc25a28-b	Mitoferrin-2B OS=Xenopus laevis GN=slc25a28-b PE=2 SV=1	186	0.5	1	0.5	0	0.5	0	0.75	0.25	0.333333	-1.58496	0.292893	0.533291
sp|Q6GLJ0|MFN2A_XENLA	219		0	0	slc25a28-a	Mitoferrin-2A OS=Xenopus laevis GN=slc25a28-a PE=2 SV=1	186	0.5	1	0.5	0	0.5	0	0.75	0.25	0.333333	-1.58496	0.292893	0.533291
tr|P70020|P70020_XENLA	220	C	1	0		Olfactory receptor (Fragment) OS=Xenopus laevis PE=3 SV=1	222	0.5	1	0.5	0	0.5	0	0.75	0.25	0.333333	-1.58496	0.292893	0.533291
tr|Q08B65|Q08B65_XENLA	251	C	1	0	tfdp2	LOC100158337 protein OS=Xenopus laevis GN=tfdp2 PE=2 SV=1	376	0.5	1	0.5	0	0.5	0	0.75	0.25	0.333333	-1.58496	0.292893	0.533291
tr|Q6GPS0|Q6GPS0_XENLA	252	C	1	0	mdn1	MGC82653 protein OS=Xenopus laevis GN=mdn1 PE=2 SV=1	374	0.5	1	0.5	0	0.5	0	0.75	0.25	0.333333	-1.58496	0.292893	0.533291
sp|P47830|RL27A_XENLA	273	C	0	1	rpl27a	60S ribosomal protein L27a OS=Xenopus laevis GN=rpl27a PE=2 SV=2	148	0.5	1	0.5	0	0.5	0	0.75	0.25	0.333333	-1.58496	0.292893	0.533291
tr|Q7SZB2|Q7SZB2_XENLA	273		0	0	rpl27a	Rpl27a protein OS=Xenopus laevis GN=rpl27a PE=2 SV=1	148	0.5	1	0.5	0	0.5	0	0.75	0.25	0.333333	-1.58496	0.292893	0.533291
tr|Q7SZF6|Q7SZF6_XENLA	297	C	1	0	vtgb1	Vitellogenin B1 OS=Xenopus laevis GN=vtgb1 PE=2 SV=1	1817	0.5	1	0.5	0	0.5	0	0.75	0.25	0.333333	-1.58496	0.292893	0.533291
tr|Q4QR17|Q4QR17_XENLA	315	C	1	0	MGC114939	MGC114939 protein OS=Xenopus laevis GN=MGC114939 PE=2 SV=1	369	0.5	1	0.5	0	0.5	0	0.75	0.25	0.333333	-1.58496	0.292893	0.533291
sp|Q7ZX03|FOXK2_XENLA	316	C	1	0	foxk2	Forkhead box protein K2 OS=Xenopus laevis GN=foxk2 PE=2 SV=2	642	0.5	1	0.5	0	0.5	0	0.75	0.25	0.333333	-1.58496	0.292893	0.533291
sp|P62155|CALM_XENLA	318	C	0	2	calm1	Calmodulin OS=Xenopus laevis GN=calm1 PE=1 SV=2	149	0.5	1	0.5	0	0.5	1	0.75	0.25	0.333333	-1.58496	0.292893	0.533291
tr|Q7SZ95|Q7SZ95_XENLA	318		0	0	Cam	Cam protein (Fragment) OS=Xenopus laevis GN=Cam PE=2 SV=1	143	0.5	1	0.5	0	0.5	1	0.75	0.25	0.333333	-1.58496	0.292893	0.533291
sp|D3IUT5|TICRR_XENLA	331	C	1	0	ticrr	Treslin OS=Xenopus laevis GN=ticrr PE=1 SV=1	1985	0.5	1	0.5	0	0.5	0	0.75	0.25	0.333333	-1.58496	0.292893	0.533291
sp|P51951|MAT1_XENLA	332	C	1	0	mnat1	CDK-activating kinase assembly factor MAT1 OS=Xenopus laevis GN=mnat1 PE=2 SV=1	309	0.5	1	0.5	0	0.5	0	0.75	0.25	0.333333	-1.58496	0.292893	0.533291
tr|Q7ZTM8|Q7ZTM8_XENLA	343	C	0	1	LOC398448	LOC398448 protein (Fragment) OS=Xenopus laevis GN=LOC398448 PE=2 SV=1	306	0.5	1	0.5	0	0.5	0	0.75	0.25	0.333333	-1.58496	0.292893	0.533291
tr|Q2VPF1|Q2VPF1_XENLA	343		0	0	tra2b	LOC398448 protein OS=Xenopus laevis GN=tra2b PE=2 SV=1	298	0.5	1	0.5	0	0.5	0	0.75	0.25	0.333333	-1.58496	0.292893	0.533291
tr|Q6GPZ8|Q6GPZ8_XENLA	343		0	0	LOC443599	LOC443599 protein (Fragment) OS=Xenopus laevis GN=LOC443599 PE=2 SV=1	304	0.5	1	0.5	0	0.5	0	0.75	0.25	0.333333	-1.58496	0.292893	0.533291
sp|Q4FZQ6|PR38A_XENLA	345	C	0	1	prpf38a	Pre-mRNA-splicing factor 38A OS=Xenopus laevis GN=prpf38a PE=2 SV=1	312	0.5	1	0.5	0	0.5	0	0.75	0.25	0.333333	-1.58496	0.292893	0.533291
tr|Q6IP13|Q6IP13_XENLA	345		0	0	LOC432312	LOC432312 protein (Fragment) OS=Xenopus laevis GN=LOC432312 PE=2 SV=1	293	0.5	1	0.5	0	0.5	0	0.75	0.25	0.333333	-1.58496	0.292893	0.533291
tr|Q5BL88|Q5BL88_XENLA	12	C	0	25	XORC1	XORC1 protein OS=Xenopus laevis GN=XORC1 PE=2 SV=1	886	7	5	1	3	5	4	6	2	0.333333	-1.58496	0.105573	0.976448
tr|P70049|P70049_XENLA	12		0	0	orc1	Origin recognition complex protein 1 OS=Xenopus laevis GN=orc1 PE=2 SV=1	886	7	5	1	3	5	4	6	2	0.333333	-1.58496	0.105573	0.976448
sp|Q9DE26|RUVB1_XENLA	152	C	0	21	ruvbl1	RuvB-like 1 OS=Xenopus laevis GN=ruvbl1 PE=2 SV=1	456	5	4	2	1	4	5	4.5	1.5	0.333333	-1.58496	0.0513167	1.28974
tr|Q6GR29|Q6GR29_XENLA	152		0	0	ruvbl1	Ruvbl1 protein OS=Xenopus laevis GN=ruvbl1 PE=2 SV=1	456	5	4	2	1	4	5	4.5	1.5	0.333333	-1.58496	0.0513167	1.28974
tr|Q6DE48|Q6DE48_XENLA	306	C	7	0	rbbp5	Rbbp5-prov protein OS=Xenopus laevis GN=rbbp5 PE=2 SV=1	501	1	2	1	0	2	1	1.5	0.5	0.333333	-1.58496	0.292893	0.533291
tr|Q3KPK3|Q3KPK3_XENLA	43		0	0		Uncharacterized protein OS=Xenopus laevis PE=2 SV=1	376	4	3	1	1	3	2	3.5	1	0.285714	-1.80735	0.125666	0.900782
tr|Q1XCD9|Q1XCD9_XENLA	225	C	8	0	hmgb3	High mobility group B3b protein OS=Xenopus laevis GN=hmgb3 PE=2 SV=1	201	1	1	0.5	0	3	3	1	0.25	0.25	-2	0.204833	0.688601
tr|Q4QQY4|Q4QQY4_XENLA	188	C	6	0	LOC733278	LOC733278 protein (Fragment) OS=Xenopus laevis GN=LOC733278 PE=2 SV=1	544	2	0	0.5	0	2	2	1	0.25	0.25	-2	0.588295	0.230405
sp|Q498G2|CE152_XENLA	231	C	0	6	cep152	Centrosomal protein of 152 kDa OS=Xenopus laevis GN=cep152 PE=2 SV=1	1663	2	0	0.5	0	2	2	1	0.25	0.25	-2	0.588295	0.230405
sp|Q63ZP1|PHF10_XENLA	62	C	1	3	phf10	PHD finger protein 10 OS=Xenopus laevis GN=phf10 PE=2 SV=2	506	1	1	0.5	0	1	1	1	0.25	0.25	-2	0.204833	0.688601
tr|A2BDA9|A2BDA9_XENLA	107		0	0	LOC100037087	LOC100037087 protein OS=Xenopus laevis GN=LOC100037087 PE=2 SV=1	490	1	1	0.5	0	1	2	1	0.25	0.25	-2	0.204833	0.688601
tr|A0JMW3|A0JMW3_XENLA	196	C	3	0	ints7	LOC100036786 protein OS=Xenopus laevis GN=ints7 PE=2 SV=1	982	2	0	0.5	0	1	0	1	0.25	0.25	-2	0.588295	0.230405
tr|Q4V7M4|Q4V7M4_XENLA	200	C	2	1	top1.2	MGC115546 protein OS=Xenopus laevis GN=top1.2 PE=2 SV=1	503	1	1	0.5	0	1	0	1	0.25	0.25	-2	0.204833	0.688601
sp|Q6NRI8|CENPS_XENLA	279	C	3	0	apitd1	Centromere protein S OS=Xenopus laevis GN=apitd1 PE=2 SV=1	135	1	1	0.5	0	1	0	1	0.25	0.25	-2	0.204833	0.688601
tr|Q6DCJ2|Q6DCJ2_XENLA	290	C	4	0	ell2	MGC82755 protein OS=Xenopus laevis GN=ell2 PE=2 SV=1	494	1	1	0.5	0	1	1	1	0.25	0.25	-2	0.204833	0.688601
tr|Q6DDU1|Q6DDU1_XENLA	62		0	0	MGC82172	MGC82172 protein OS=Xenopus laevis GN=MGC82172 PE=2 SV=1	291	1	1	0.5	0	0.5	1	1	0.25	0.25	-2	0.204833	0.688601
tr|Q7SZT0|Q7SZT0_XENLA	147	C	0	2	eaf2	ELL associated factor 2 OS=Xenopus laevis GN=eaf2 PE=2 SV=1	250	1	1	0.5	0	0.5	0	1	0.25	0.25	-2	0.204833	0.688601
tr|Q6PAG5|Q6PAG5_XENLA	147		0	0	eaf2	MGC68453 protein OS=Xenopus laevis GN=eaf2 PE=2 SV=1	251	1	1	0.5	0	0.5	0	1	0.25	0.25	-2	0.204833	0.688601
sp|Q32N93|INCEB_XENLA	198	C	0	1	incenp-b	Inner centromere protein B OS=Xenopus laevis GN=incenp-b PE=2 SV=1	892	2	0	0.5	0	0.5	0	1	0.25	0.25	-2	0.588295	0.230405
tr|Q498L5|Q498L5_XENLA	198		0	0	LOC398822	LOC398822 protein (Fragment) OS=Xenopus laevis GN=LOC398822 PE=2 SV=1	606	2	0	0.5	0	0.5	0	1	0.25	0.25	-2	0.588295	0.230405
tr|Q6GME0|Q6GME0_XENLA	198		0	0	LOC398822	LOC398822 protein (Fragment) OS=Xenopus laevis GN=LOC398822 PE=2 SV=1	540	2	0	0.5	0	0.5	0	1	0.25	0.25	-2	0.588295	0.230405
tr|Q6PAZ7|Q6PAZ7_XENLA	198		0	0	LOC398822	LOC398822 protein (Fragment) OS=Xenopus laevis GN=LOC398822 PE=2 SV=1	613	2	0	0.5	0	0.5	0	1	0.25	0.25	-2	0.588295	0.230405
sp|P55863|SOX3A_XENLA	240	C	2	0	sox3-a	Transcription factor Sox-3-A OS=Xenopus laevis GN=sox3-a PE=1 SV=1	309	1	1	0.5	0	0.5	0	1	0.25	0.25	-2	0.204833	0.688601
tr|A0AUU1|A0AUU1_XENLA	242	C	2	0	mlh1	LOC100036779 protein OS=Xenopus laevis GN=mlh1 PE=2 SV=1	750	1	1	0.5	0	0.5	0	1	0.25	0.25	-2	0.204833	0.688601
tr|Q2KHP5|Q2KHP5_XENLA	244	C	2	0		Uncharacterized protein OS=Xenopus laevis PE=2 SV=1	391	1	1	0.5	0	0.5	0	1	0.25	0.25	-2	0.204833	0.688601
tr|Q5U248|Q5U248_XENLA	263	C	0	2	crebbp	LOC495689 protein OS=Xenopus laevis GN=crebbp PE=2 SV=1	2428	1	1	0.5	0	0.5	0	1	0.25	0.25	-2	0.204833	0.688601
tr|Q7ZXN6|Q7ZXN6_XENLA	263		0	0	crebbp-A	Crebbp-A protein (Fragment) OS=Xenopus laevis GN=crebbp-A PE=2 SV=1	1047	1	1	0.5	0	0.5	0	1	0.25	0.25	-2	0.204833	0.688601
sp|Q6NRW0|MTBP_XENLA	277	C	2	0	mtbp	Mdm2-binding protein OS=Xenopus laevis GN=mtbp PE=2 SV=1	860	1	1	0.5	0	0.5	0	1	0.25	0.25	-2	0.204833	0.688601
sp|Q52KD8|EAF6_XENLA	282	C	2	0	meaf6	Chromatin modification-related protein MEAF6 OS=Xenopus laevis GN=meaf6 PE=2 SV=1	188	1	1	0.5	0	0.5	0	1	0.25	0.25	-2	0.204833	0.688601
tr|Q0VA85|Q0VA85_XENLA	314	C	2	0	mki67	Mki67 protein (Fragment) OS=Xenopus laevis GN=mki67 PE=2 SV=1	2080	1	1	0.5	0	0.5	0	1	0.25	0.25	-2	0.204833	0.688601
tr|Q52L27|Q52L27_XENLA	328	C	2	0	LOC733207	LOC733207 protein (Fragment) OS=Xenopus laevis GN=LOC733207 PE=2 SV=1	1416	1	1	0.5	0	0.5	0	1	0.25	0.25	-2	0.204833	0.688601
tr|A0JMY9|A0JMY9_XENLA	334	C	2	0	hic2	Hic2 protein OS=Xenopus laevis GN=hic2 PE=2 SV=1	458	1	1	0.5	0	0.5	0	1	0.25	0.25	-2	0.204833	0.688601
tr|Q32NM8|Q32NM8_XENLA	337	C	2	0	u2af1	MGC131026 protein OS=Xenopus laevis GN=u2af1 PE=2 SV=1	245	1	1	0.5	0	0.5	0	1	0.25	0.25	-2	0.204833	0.688601
sp|P70062|T7L1A_XENLA	339	C	0	2	tcf7l1-a	Transcription factor 7-like 1-A OS=Xenopus laevis GN=tcf7l1-a PE=1 SV=1	554	1	1	0.5	0	0.5	0	1	0.25	0.25	-2	0.204833	0.688601
sp|P70063|T7L1C_XENLA	339		0	0	tcf7l1-c	Transcription factor 7-like 1-C OS=Xenopus laevis GN=tcf7l1-c PE=2 SV=1	550	1	1	0.5	0	0.5	0	1	0.25	0.25	-2	0.204833	0.688601
sp|P70064|T7L1D_XENLA	339		0	0	tcf7l1-d	Transcription factor 7-like 1-D OS=Xenopus laevis GN=tcf7l1-d PE=2 SV=1	550	1	1	0.5	0	0.5	0	1	0.25	0.25	-2	0.204833	0.688601
sp|Q90ZB6|T7L1B_XENLA	339		0	0	tcf7l1-b	Transcription factor 7-like 1-B OS=Xenopus laevis GN=tcf7l1-b PE=1 SV=1	551	1	1	0.5	0	0.5	0	1	0.25	0.25	-2	0.204833	0.688601
tr|B7ZQ53|B7ZQ53_XENLA	339		0	0	tcf7l1	Transcription factor XTCF-3b OS=Xenopus laevis GN=tcf7l1 PE=2 SV=1	554	1	1	0.5	0	0.5	0	1	0.25	0.25	-2	0.204833	0.688601
tr|Q98997|Q98997_XENLA	339		0	0		Transcription factor XTCF-3b (Fragment) OS=Xenopus laevis PE=2 SV=1	466	1	1	0.5	0	0.5	0	1	0.25	0.25	-2	0.204833	0.688601
sp|Q6GQ82|SNF5_XENLA	43	C	1	14	smarcb1	SWI/SNF-related matrix-associated actin-dependent regulator of chromatin subfamily B member 1 OS=Xenopus laevis GN=smarcb1 PE=2 SV=1	378	5	3	1	1	3	2	4	1	0.25	-2	0.204833	0.688601
sp|Q09003|COIL_XENLA	209	C	8	0	coil	Coilin OS=Xenopus laevis GN=coil PE=2 SV=2	536	3	2	1	0	2	0	2.5	0.5	0.2	-2.32193	0.105573	0.976448
sp|P08776|K2C8_XENLA	107	C	2	0		Keratin, type II cytoskeletal 8 OS=Xenopus laevis PE=2 SV=1	502	1	2	0.5	0	2	1	1.5	0.25	0.166667	-2.58496	0.198727	0.701742
tr|A8E601|A8E601_XENLA	299	C	4	0	LOC100126636	LOC100126636 protein (Fragment) OS=Xenopus laevis GN=LOC100126636 PE=2 SV=1	504	2	1	0.5	0	1	0	1.5	0.25	0.166667	-2.58496	0.198727	0.701742
tr|C8YR60|C8YR60_XENLA	178	C	3	0	cenpc	Centromere protein C OS=Xenopus laevis GN=cenpc PE=2 SV=1	1400	1	2	0.5	0	0.5	0	1.5	0.25	0.166667	-2.58496	0.198727	0.701742
sp|O13024|INCEA_XENLA	198	C	2	1	incenp-a	Inner centromere protein A OS=Xenopus laevis GN=incenp-a PE=1 SV=1	873	2	1	0.5	0	0.5	0	1.5	0.25	0.166667	-2.58496	0.198727	0.701742
sp|A2RRX6|NPAT_XENLA	84	C	25	0	npat	Protein NPAT OS=Xenopus laevis GN=npat PE=2 SV=1	1356	7	8	2	0	4	4	7.5	1	0.133333	-2.90689	0.0546643	1.2623
tr|Q98UJ3|Q98UJ3_XENLA	107	C	0	4	krt5.5	Larval keratin XLK OS=Xenopus laevis GN=krt5.5 PE=2 SV=1	580	2	2	0.5	0	2	3	2	0.25	0.125	-3	0.0903345	1.04415
tr|A1L2T3|A1L2T3_XENLA	107		0	0	krt5.6	LOC100036944 protein OS=Xenopus laevis GN=krt5.6 PE=2 SV=1	591	2	2	0.5	0	2	3	2	0.25	0.125	-3	0.0903345	1.04415
tr|B7ZSI2|B7ZSI2_XENLA	107		0	0	lk-a	Lk-a protein OS=Xenopus laevis GN=lk-a PE=2 SV=1	579	2	2	0.5	0	2	3	2	0.25	0.125	-3	0.0903345	1.04415
sp|P16878|K2C5_XENLA	107	C	4	7		Keratin, type II cytoskeletal OS=Xenopus laevis PE=2 SV=2	513	2	4	0.5	0	3	2	3	0.25	0.0833333	-3.58496	0.205449	0.687296

## Sheet: gap vs cSL
Protein	Group ID	Collapsed?	Unique Peptides	Razor Peptides	Gene	Description	SeqLen	A1-187	A2-189	B1-195	B2-197	C1-201	C2-203	moyB	moyC	C/B	log2 C/B	p(C/B)	logp(C/B)
tr|Q1XCD9|Q1XCD9_XENLA	225	C	8	0	hmgb3	hmgb3	201	1	1	0.5	0	3	3	0.25	3	12	3.58496	0.0577159	1.2387		Sample A: rcc
sp|P16878|K2C5_XENLA	107	C	4	7		Keratin, type II cytoskeletal OS=Xenopus laevis PE=2 SV=2	513	2	4	0.5	0	3	2	0.25	2.5	10	3.32193	0.0917103	1.03758		Sample B: gap
tr|Q98UJ3|Q98UJ3_XENLA	107	C	0	4	krt5.5	Larval keratin XLK OS=Xenopus laevis GN=krt5.5 PE=2 SV=1	580	2	2	0.5	0	2	3	0.25	2.5	10	3.32193	0.0917103	1.03758		Sample C: cSL
tr|Q6AZR6|Q6AZR6_XENLA	7	C	1	3	xrcc6	LOC398357 protein OS=Xenopus laevis GN=xrcc6 PE=2 SV=1	611	0.5	0	0.5	0	4	0	0.25	2	8	3	0.541249	0.266603
sp|Q5XH16|NH2L1_XENLA	122	C	2	3	snu13	NHP2-like protein 1 OS=Xenopus laevis GN=snu13 PE=2 SV=1	128	0.5	1	0.5	0	2	2	0.25	2	8	3	0.0903345	1.04415
tr|Q4QQY4|Q4QQY4_XENLA	188	C	6	0	LOC733278	LOC733278 protein (Fragment) OS=Xenopus laevis GN=LOC733278 PE=2 SV=1	544	2	0	0.5	0	2	2	0.25	2	8	3	0.0903345	1.04415
sp|Q498G2|CE152_XENLA	231	C	0	6	cep152	Centrosomal protein of 152 kDa OS=Xenopus laevis GN=cep152 PE=2 SV=1	1663	2	0	0.5	0	2	2	0.25	2	8	3	0.0903345	1.04415
tr|Q9W627|Q9W627_XENLA	288	C	0	4		Ku80 autoantigen homologue (Fragment) OS=Xenopus laevis PE=2 SV=1	726	0.5	0	0.5	0	2	2	0.25	2	8	3	0.0903345	1.04415
sp|Q9W758|CTBP2_XENLA	21	C	4	0	ctbp2	C-terminal-binding protein 2 OS=Xenopus laevis GN=ctbp2 PE=1 SV=1	437	1	0	0.5	0	1	2	0.25	1.5	6	2.58496	0.198727	0.701742
sp|P08776|K2C8_XENLA	107	C	2	0		Keratin, type II cytoskeletal 8 OS=Xenopus laevis PE=2 SV=1	502	1	2	0.5	0	2	1	0.25	1.5	6	2.58496	0.198727	0.701742
tr|Q9PWM7|Q9PWM7_XENLA	217	C	0	3	cdc7-cell division cycle protein with kinase activity that is critical for the G1/S transition	Protein kinase Cdc7 OS=Xenopus laevis GN=cdc7 PE=2 SV=1	483	0.5	0	0.5	0	2	1	0.25	1.5	6	2.58496	0.198727	0.701742
sp|Q71U00|SKP1_XENLA	270	C	3	0	skp1	S-phase kinase-associated protein 1 OS=Xenopus laevis GN=skp1 PE=1 SV=3	163	0.5	0	0.5	0	1	2	0.25	1.5	6	2.58496	0.198727	0.701742
sp|Q63ZP1|PHF10_XENLA	62	C	1	3	phf10	PHD finger protein 10 OS=Xenopus laevis GN=phf10 PE=2 SV=2	506	1	1	0.5	0	1	1	0.25	1	4	2	0.204833	0.688601
sp|P07222|NPM_XENLA	71	C	0	3	npm1	Nucleophosmin OS=Xenopus laevis GN=npm1 PE=1 SV=1	299	0.5	1	0.5	0	1	1	0.25	1	4	2	0.204833	0.688601
sp|A2RRX6|NPAT_XENLA	84	C	25	0	npat	Protein NPAT OS=Xenopus laevis GN=npat PE=2 SV=1	1356	7	8	2	0	4	4	1	4	4	2	0.204833	0.688601
tr|Q4QQZ3|Q4QQZ3_XENLA	184	C	3	0	ppih	Peptidyl-prolyl cis-trans isomerase OS=Xenopus laevis GN=ppih PE=2 SV=1	177	0.5	1	0.5	0	1	1	0.25	1	4	2	0.204833	0.688601
sp|Q9DEI1|PRKDC_XENLA	236	C	2	0	prkdc	DNA-dependent protein kinase catalytic subunit OS=Xenopus laevis GN=prkdc PE=2 SV=1	4146	0.5	0	0.5	0	1	1	0.25	1	4	2	0.204833	0.688601
tr|Q6NRJ4|Q6NRJ4_XENLA	266	C	3	0	mcph1	MGC83773 protein OS=Xenopus laevis GN=mcph1 PE=2 SV=1	305	0.5	1	0.5	0	1	1	0.25	1	4	2	0.204833	0.688601
sp|O42226|I4A3B_XENLA	269	C	0	2	eif4a3-b	Eukaryotic initiation factor 4A-III-B OS=Xenopus laevis GN=eif4a3-b PE=2 SV=1	414	0.5	0	0.5	0	2	0	0.25	1	4	2	0.588295	0.230405
sp|Q6NRP2|PSME4_XENLA	278	C	0	2	psme4	Proteasome activator complex subunit 4 OS=Xenopus laevis GN=psme4 PE=2 SV=1	1828	0.5	0	0.5	0	1	1	0.25	1	4	2	0.204833	0.688601
tr|Q6DCJ2|Q6DCJ2_XENLA	290	C	4	0	ell2	MGC82755 protein OS=Xenopus laevis GN=ell2 PE=2 SV=1	494	1	1	0.5	0	1	1	0.25	1	4	2	0.204833	0.688601
sp|P19600|HNRPC_XENLA	319	C	0	3	hnrnpc	Heterogeneous nuclear ribonucleoprotein C OS=Xenopus laevis GN=hnrnpc PE=2 SV=1	282	1	0	0.5	0	1	1	0.25	1	4	2	0.204833	0.688601
sp|Q6DFF2|BRD4B_XENLA	56	C	4	0	brd4-b	Bromodomain-containing protein 4B OS=Xenopus laevis GN=brd4-b PE=2 SV=1	1362	2	1	2	2	8	6	2	7	3.5	1.80735	0.125666	0.900782
sp|Q91628|ORC2_XENLA	112	C	0	10	orc2	Origin recognition complex subunit 2 OS=Xenopus laevis GN=orc2 PE=2 SV=1	558	3	1	0.5	1	4	1	0.75	2.5	3.33333	1.73697	0.447544	0.349165
sp|Q9DE26|RUVB1_XENLA	152	C	0	21	ruvbl1	RuvB-like 1 OS=Xenopus laevis GN=ruvbl1 PE=2 SV=1	456	5	4	2	1	4	5	1.5	4.5	3	1.58496	0.0513167	1.28974
tr|Q6NRV0|Q6NRV0_XENLA	154	C	1	0	traip	MGC81341 protein OS=Xenopus laevis GN=traip PE=2 SV=1	464	0.5	0	0.5	0	0.5	1	0.25	0.75	3	1.58496	0.292893	0.533291
tr|Q6GPS9|Q6GPS9_XENLA	204	C	1	0	hadha	MGC82638 protein OS=Xenopus laevis GN=hadha PE=2 SV=1	760	0.5	0	0.5	0	0.5	1	0.25	0.75	3	1.58496	0.292893	0.533291
tr|Q09044|Q09044_XENLA	216	C	1	0	XFO	Zinc finger protein (Fragment) OS=Xenopus laevis GN=XFO 1-1 PE=2 SV=1	233	0.5	0	0.5	0	0.5	1	0.25	0.75	3	1.58496	0.292893	0.533291
tr|Q5G8Z4|Q5G8Z4_XENLA	224	C	1	0	tcof1	Treacle OS=Xenopus laevis GN=tcof1 PE=2 SV=1	1476	0.5	0	0.5	0	0.5	1	0.25	0.75	3	1.58496	0.292893	0.533291
sp|Q4V862|CDK9A_XENLA	248	C	2	0	cdk9-a	Cyclin-dependent kinase 9-A OS=Xenopus laevis GN=cdk9-a PE=2 SV=1	376	1	0	0.5	0	0.5	1	0.25	0.75	3	1.58496	0.292893	0.533291
sp|Q4V7N4|TMA16_XENLA	254	C	1	0	tma16	Translation machinery-associated protein 16 OS=Xenopus laevis GN=tma16 PE=2 SV=1	196	0.5	0	0.5	0	0.5	1	0.25	0.75	3	1.58496	0.292893	0.533291
tr|B1N659|B1N659_XENLA	268	C	1	0	kcnq1	KvLQT-1 OS=Xenopus laevis GN=kcnq1 PE=2 SV=1	652	0.5	0	0.5	0	0.5	1	0.25	0.75	3	1.58496	0.292893	0.533291
tr|Q0VGW8|Q0VGW8_XENLA	271	C	0	1	hal.2	Histidine ammonia-lyase OS=Xenopus laevis GN=hal.2 PE=2 SV=1	664	0.5	0	0.5	0	0.5	1	0.25	0.75	3	1.58496	0.292893	0.533291
tr|A1L2I6|A1L2I6_XENLA	276	C	1	0	LOC100036859	LOC100036859 protein OS=Xenopus laevis GN=LOC100036859 PE=2 SV=1	599	0.5	0	0.5	0	0.5	1	0.25	0.75	3	1.58496	0.292893	0.533291
tr|Q6DE48|Q6DE48_XENLA	306	C	7	0	rbbp5	Rbbp5-prov protein OS=Xenopus laevis GN=rbbp5 PE=2 SV=1	501	1	2	1	0	2	1	0.5	1.5	3	1.58496	0.292893	0.533291
sp|P62155|CALM_XENLA	318	C	0	2	calm1	Calmodulin OS=Xenopus laevis GN=calm1 PE=1 SV=2	149	0.5	1	0.5	0	0.5	1	0.25	0.75	3	1.58496	0.292893	0.533291
sp|Q6GQ82|SNF5_XENLA	43	C	1	14	smarcb1	SWI/SNF-related matrix-associated actin-dependent regulator of chromatin subfamily B member 1 OS=Xenopus laevis GN=smarcb1 PE=2 SV=1	378	5	3	1	1	3	2	1	2.5	2.5	1.32193	0.204833	0.688601
tr|Q71QG2|Q71QG2_XENLA	233	C	1	0		PIAS OS=Xenopus laevis PE=2 SV=1	499	2	1	1	1	2	3	1	2.5	2.5	1.32193	0.204833	0.688601
tr|Q5BL88|Q5BL88_XENLA	12	C	0	25	XORC1	XORC1 protein OS=Xenopus laevis GN=XORC1 PE=2 SV=1	886	7	5	1	3	5	4	2	4.5	2.25	1.16993	0.198727	0.701742
sp|Q08D75|BRD4A_XENLA	56	C	4	21	brd4-a	Bromodomain-containing protein 4A OS=Xenopus laevis GN=brd4-a PE=2 SV=1	1351	3	3	3	3	7	6	3	6.5	2.16667	1.11548	0.0903345	1.04415
sp|Q6GMY9|XPO2_XENLA	2	C	20	0	cse1l	Exportin-2 OS=Xenopus laevis GN=cse1l PE=2 SV=1	971	5	3	2	2	5	3	2	4	2	1	0.295167	0.529932
tr|Q7ZWN3|Q7ZWN3_XENLA	4	C	21	6	chd4	B230399n07 protein OS=Xenopus laevis GN=chd4 PE=2 SV=1	1893	7	5	3	2	10	0	2.5	5	2	1	0.704795	0.151937
tr|Q6NUC7|Q6NUC7_XENLA	23	C	2	0		Uncharacterized protein OS=Xenopus laevis PE=2 SV=1	196	0.5	1	0.5	0	1	0	0.25	0.5	2	1	0.711723	0.147689
tr|Q6GR42|Q6GR42_XENLA	48	C	1	0	gtf2h2	MGC81060 protein OS=Xenopus laevis GN=gtf2h2 PE=2 SV=1	395	0.5	0	0.5	0	1	0	0.25	0.5	2	1	0.711723	0.147689
tr|A3KNE6|A3KNE6_XENLA	50	C	1	1	LOC100049116	LOC100049116 protein (Fragment) OS=Xenopus laevis GN=LOC100049116 PE=2 SV=1	58	0.5	1	1	1	3	1	1	2	2	1	0.5	0.30103
tr|Q68EU5|Q68EU5_XENLA	63	C	0	7	tia1	MGC84540 protein OS=Xenopus laevis GN=tia1 PE=2 SV=1	389	2	1	0.5	1	1	2	0.75	1.5	2	1	0.349886	0.456074
tr|O93513|O93513_XENLA	70	C	0	7	orc3	Origin recognition complex associated protein p81 OS=Xenopus laevis GN=orc3 PE=2 SV=1	709	2	1	0.5	1	2	1	0.75	1.5	2	1	0.349886	0.456074
tr|Q3C2L7|Q3C2L7_XENLA	75	C	1	0	phr	CPD photolyase-like OS=Xenopus laevis GN=phr PE=2 SV=1	557	0.5	0	0.5	0	1	0	0.25	0.5	2	1	0.711723	0.147689
sp|P22232|FBRL_XENLA	76	C	0	7	fbl	rRNA 2'-O-methyltransferase fibrillarin OS=Xenopus laevis GN=fbl PE=2 SV=1	323	1	2	0.5	1	2	1	0.75	1.5	2	1	0.349886	0.456074
sp|Q66KH9|CDK8_XENLA	87	C	0	1	cdk8	Cyclin-dependent kinase 8 OS=Xenopus laevis GN=cdk8 PE=2 SV=1	416	0.5	0	0.5	0	1	0	0.25	0.5	2	1	0.711723	0.147689
sp|Q640I9|KDM2B_XENLA	88	C	2	0	kdm2b	Lysine-specific demethylase 2B OS=Xenopus laevis GN=kdm2b PE=2 SV=1	1259	1	0	0.5	0	1	0	0.25	0.5	2	1	0.711723	0.147689
tr|Q561K7|Q561K7_XENLA	96	C	0	2	LOC733205	LOC733205 protein (Fragment) OS=Xenopus laevis GN=LOC733205 PE=2 SV=1	470	1	0	0.5	0	1	0	0.25	0.5	2	1	0.711723	0.147689
tr|Q0IH66|Q0IH66_XENLA	103	C	0	1	ddx10	Ddx10 protein OS=Xenopus laevis GN=ddx10 PE=2 SV=1	663	0.5	0	0.5	0	1	0	0.25	0.5	2	1	0.711723	0.147689
tr|O57438|O57438_XENLA	118	C	0	1		Serine/threonine-protein phosphatase OS=Xenopus laevis PE=2 SV=2	518	0.5	0	0.5	0	1	0	0.25	0.5	2	1	0.711723	0.147689
tr|Q7ZYU2|Q7ZYU2_XENLA	120	C	0	1	hnrnpa0	LOC398455 protein (Fragment) OS=Xenopus laevis GN=hnrnpa0 PE=2 SV=1	308	0.5	0	0.5	0	1	0	0.25	0.5	2	1	0.711723	0.147689
tr|Q7ZY24|Q7ZY24_XENLA	140	C	15	0		Hmgb3-prov protein OS=Xenopus laevis PE=2 SV=1	202	4	2	2	1	4	2	1.5	3	2	1	0.349886	0.456074
tr|Q6INS8|Q6INS8_XENLA	157	C	1	0	gmeb1	MGC81052 protein OS=Xenopus laevis GN=gmeb1 PE=2 SV=1	502	0.5	0	0.5	0	1	0	0.25	0.5	2	1	0.711723	0.147689
tr|Q6GN08|Q6GN08_XENLA	162	C	1	0	ncapd3	LOC398742 protein OS=Xenopus laevis GN=ncapd3 PE=2 SV=1	1492	0.5	0	0.5	0	1	0	0.25	0.5	2	1	0.711723	0.147689
sp|Q7ZYL5|KF22B_XENLA	181	C	4	1	kif22-b	Kinesin-like protein KIF22-B OS=Xenopus laevis GN=kif22-b PE=2 SV=2	650	0.5	1	0.5	1	2	1	0.75	1.5	2	1	0.349886	0.456074
sp|O93479|ORC4_XENLA	194	C	0	11	orc4	Origin recognition complex subunit 4 OS=Xenopus laevis GN=orc4 PE=2 SV=1	432	3	1	0.5	2	2	3	1.25	2.5	2	1	0.316379	0.499792
tr|A0JMW3|A0JMW3_XENLA	196	C	3	0	ints7	LOC100036786 protein OS=Xenopus laevis GN=ints7 PE=2 SV=1	982	2	0	0.5	0	1	0	0.25	0.5	2	1	0.711723	0.147689
tr|Q4V7M4|Q4V7M4_XENLA	200	C	2	1	top1.2	MGC115546 protein OS=Xenopus laevis GN=top1.2 PE=2 SV=1	503	1	1	0.5	0	1	0	0.25	0.5	2	1	0.711723	0.147689
tr|Q7ZYE9|Q7ZYE9_XENLA	202	C	1	3	hnrnpab	Hnrpab-prov protein OS=Xenopus laevis GN=hnrnpab PE=1 SV=1	324	0.5	0	0.5	1	1	2	0.75	1.5	2	1	0.349886	0.456074
tr|Q7T0S3|Q7T0S3_XENLA	208	C	1	0	atp6ap2	Atp6ap2-prov protein OS=Xenopus laevis GN=atp6ap2 PE=1 SV=1	348	0.5	0	0.5	0	1	0	0.25	0.5	2	1	0.711723	0.147689
sp|Q09003|COIL_XENLA	209	C	8	0	coil	Coilin OS=Xenopus laevis GN=coil PE=2 SV=2	536	3	2	1	0	2	0	0.5	1	2	1	0.711723	0.147689
tr|Q6NTT2|Q6NTT2_XENLA	211	C	1	0	rps18	MGC82306 protein OS=Xenopus laevis GN=rps18 PE=2 SV=1	152	0.5	0	0.5	0	1	0	0.25	0.5	2	1	0.711723	0.147689
sp|P55862|MCM5A_XENLA	212	C	0	1	mcm5-a	DNA replication licensing factor mcm5-A OS=Xenopus laevis GN=mcm5-a PE=1 SV=2	735	0.5	0	0.5	0	1	0	0.25	0.5	2	1	0.711723	0.147689
tr|Q5HZR6|Q5HZR6_XENLA	214	C	1	0	LOC496324	LOC496324 protein OS=Xenopus laevis GN=LOC496324 PE=2 SV=1	292	0.5	0	0.5	0	1	0	0.25	0.5	2	1	0.711723	0.147689
tr|Q640I7|Q640I7_XENLA	233	C	1	9	pias4	LOC494663 protein OS=Xenopus laevis GN=pias4 PE=2 SV=1	501	2	2	1	1	2	2	1	2	2	1	#DIV/0!	#DIV/0!
sp|P45593|COF1B_XENLA	238	C	0	1	cfl1-b	Cofilin-1-B OS=Xenopus laevis GN=cfl1-b PE=1 SV=3	168	0.5	0	0.5	0	1	0	0.25	0.5	2	1	0.711723	0.147689
sp|Q5FWM3|SOX3B_XENLA	241	C	2	0	sox3-b	Transcription factor Sox-3-B OS=Xenopus laevis GN=sox3-b PE=2 SV=1	307	1	0	0.5	0	1	0	0.25	0.5	2	1	0.711723	0.147689
sp|Q8UVR5|BAZ1A_XENLA	253	C	12	0	baz1a	Bromodomain adjacent to zinc finger domain protein 1A (Fragment) OS=Xenopus laevis GN=baz1a PE=2 SV=1	627	3	2	0.5	2	3	2	1.25	2.5	2	1	0.316379	0.499792
sp|Q6NRI8|CENPS_XENLA	279	C	3	0	apitd1	Centromere protein S OS=Xenopus laevis GN=apitd1 PE=2 SV=1	135	1	1	0.5	0	1	0	0.25	0.5	2	1	0.711723	0.147689
sp|Q569Z1|EIF3B_XENLA	287	C	1	0	eif3b	Eukaryotic translation initiation factor 3 subunit B OS=Xenopus laevis GN=eif3b PE=2 SV=1	688	0.5	0	0.5	0	1	0	0.25	0.5	2	1	0.711723	0.147689
tr|A8E601|A8E601_XENLA	299	C	4	0	LOC100126636	LOC100126636 protein (Fragment) OS=Xenopus laevis GN=LOC100126636 PE=2 SV=1	504	2	1	0.5	0	1	0	0.25	0.5	2	1	0.711723	0.147689
tr|Q5M957|Q5M957_XENLA	305	C	1	0	dera	LOC496174 protein OS=Xenopus laevis GN=dera PE=2 SV=1	318	0.5	0	0.5	0	1	0	0.25	0.5	2	1	0.711723	0.147689
sp|Q8AVC1|AN32B_XENLA	307	C	0	1	anp32b	Acidic leucine-rich nuclear phosphoprotein 32 family member B OS=Xenopus laevis GN=anp32b PE=2 SV=1	239	0.5	0	0.5	0	1	0	0.25	0.5	2	1	0.711723	0.147689
sp|Q6GLY5|ASUN_XENLA	308	C	1	0	asun	Protein asunder homolog OS=Xenopus laevis GN=asun PE=2 SV=1	715	0.5	0	0.5	0	1	0	0.25	0.5	2	1	0.711723	0.147689
sp|Q9DDY9|PAB2A_XENLA	309	C	0	1	pabpn1-a	Polyadenylate-binding protein 2-A OS=Xenopus laevis GN=pabpn1-a PE=2 SV=1	296	0.5	0	0.5	0	1	0	0.25	0.5	2	1	0.711723	0.147689
tr|A0JMR8|A0JMR8_XENLA	312	C	4	0	dhx33	Dhx33 protein OS=Xenopus laevis GN=dhx33 PE=2 SV=1	266	0.5	1	1	0	1	1	0.5	1	2	1	0.5	0.30103
tr|Q6NRJ3|Q6NRJ3_XENLA	320	C	4	0	exosc10	MGC83774 protein OS=Xenopus laevis GN=exosc10 PE=2 SV=1	883	0.5	1	1	0	1	1	0.5	1	2	1	0.5	0.30103
tr|A8QZK6|A8QZK6_XENLA	325	C	0	2	xeco2	XEco2 OS=Xenopus laevis GN=xeco2 PE=2 SV=1	702	0.5	1	0.5	0	1	0	0.25	0.5	2	1	0.711723	0.147689
tr|Q801P9|Q801P9_XENLA	338	C	0	1		MGC53795 protein OS=Xenopus laevis PE=2 SV=1	607	0.5	0	0.5	0	1	0	0.25	0.5	2	1	0.711723	0.147689
tr|Q6DCY8|Q6DCY8_XENLA	169	C	0	15	wdr5	Wdr5-prov protein OS=Xenopus laevis GN=wdr5 PE=2 SV=1	334	2	2	2	2	4	3	2	3.5	1.75	0.807355	0.204833	0.688601
sp|O42227|HDA1B_XENLA	74	C	0	28	hdac1-b	Probable histone deacetylase 1-B OS=Xenopus laevis GN=hdac1-b PE=1 SV=1	480	6	6	2	4	5	5	3	5	1.66667	0.736966	0.295167	0.529932
sp|Q6DE08|AUKBA_XENLA	80	C	1	5	aurkb-a	Aurora kinase B-A OS=Xenopus laevis GN=aurkb-a PE=1 SV=1	361	2	1	0.5	1	0.5	2	0.75	1.25	1.66667	0.736966	0.62483	0.204238
tr|Q4V867|Q4V867_XENLA	131	C	11	0	orc5	MGC114641 protein OS=Xenopus laevis GN=orc5 PE=2 SV=1	448	2	1	1	2	2	3	1.5	2.5	1.66667	0.736966	0.292893	0.533291
tr|Q68F48|Q68F48_XENLA	138	C	0	13	LOC446279	LOC446279 protein (Fragment) OS=Xenopus laevis GN=LOC446279 PE=2 SV=1	479	3	2	1	2	2	3	1.5	2.5	1.66667	0.736966	0.292893	0.533291
tr|Q7ZYI5|Q7ZYI5_XENLA	142	C	15	0	actl6a	Baf53a-pending-prov protein OS=Xenopus laevis GN=actl6a PE=2 SV=1	429	3	4	2	1	3	2	1.5	2.5	1.66667	0.736966	0.292893	0.533291
sp|Q8QFR2|HIRA_XENLA	50	C	65	5	hira	Protein HIRA OS=Xenopus laevis GN=hira PE=1 SV=2	1013	13	12	8	9	16	12	8.5	14	1.64706	0.719892	0.205449	0.687296
tr|Q7ZX79|Q7ZX79_XENLA	73	C	0	16	nono	p54nrb protein OS=Xenopus laevis GN=nono PE=2 SV=1	464	3	0	1	4	5	3	2.5	4	1.6	0.678072	0.503838	0.297709
sp|Q6NUF4|TPX2A_XENLA	41	C	6	1	tpx2-a	Targeting protein for Xklp2-A OS=Xenopus laevis GN=tpx2-a PE=1 SV=1	716	2	0	1	1	2	1	1	1.5	1.5	0.584963	0.5	0.30103
sp|Q91695|HDA1A_XENLA	74	C	1	0	hdac1-a	Probable histone deacetylase 1-A OS=Xenopus laevis GN=hdac1-a PE=1 SV=1	480	4	5	1	3	3	3	2	3	1.5	0.584963	0.5	0.30103
tr|Q6NTQ1|Q6NTQ1_XENLA	135	C	18	0	MGC83104	MGC83104 protein OS=Xenopus laevis GN=MGC83104 PE=2 SV=1	797	2	1	2	4	5	4	3	4.5	1.5	0.584963	0.349886	0.456074
sp|P52301|RAN_XENLA	165	C	6	0	ran	GTP-binding nuclear protein Ran OS=Xenopus laevis GN=ran PE=1 SV=2	216	0.5	1	1	1	1	2	1	1.5	1.5	0.584963	0.5	0.30103
tr|Q6GPC0|Q6GPC0_XENLA	167	C	25	1	top3a	DNA topoisomerase OS=Xenopus laevis GN=top3a PE=2 SV=1	1022	3	3	2	6	8	4	4	6	1.5	0.584963	0.552786	0.257443
tr|Q6PAX0|Q6PAX0_XENLA	213	C	10	0	brip1	MGC68622 protein OS=Xenopus laevis GN=brip1 PE=2 SV=1	713	0.5	0	2	2	4	2	2	3	1.5	0.584963	0.5	0.30103
tr|A2BD79|A2BD79_XENLA	239	C	0	9	LOC733436	LOC733436 protein (Fragment) OS=Xenopus laevis GN=LOC733436 PE=2 SV=1	474	2	2	1	1	2	1	1	1.5	1.5	0.584963	0.5	0.30103
sp|Q9DEY9|BLM_XENLA	15	C	20	6	blm	Bloom syndrome protein homolog OS=Xenopus laevis GN=blm PE=2 SV=1	1364	2	2	4	5	7	6	4.5	6.5	1.44444	0.530515	0.105573	0.976448
tr|Q4JNX8|Q4JNX8_XENLA	5	C	0	11	RTS	RECQL4-helicase-like protein OS=Xenopus laevis GN=RTS PE=2 SV=1	1500	1	2	0.5	3	3	2	1.75	2.5	1.42857	0.514573	0.657481	0.182117
sp|P70094|H2AZL_XENLA	18	C	0	11	h2a.zl1	Histone H2A.Z-like OS=Xenopus laevis GN=h2a.zl1 PE=2 SV=3	128	3	3	2	3	4	3	2.5	3.5	1.4	0.485427	0.292893	0.533291
tr|Q800A4|Q800A4_XENLA	24	C	15	0	prim1	DNA primase OS=Xenopus laevis GN=prim1 PE=2 SV=1	420	2	1	2	3	4	3	2.5	3.5	1.4	0.485427	0.292893	0.533291
sp|P25979|UBF1A_XENLA	105	C	13	0	ubtf-a	Nucleolar transcription factor 1-A OS=Xenopus laevis GN=ubtf-a PE=2 SV=1	677	10	12	7	11	14	11	9	12.5	1.38889	0.473931	0.305373	0.515169
tr|Q7ZY22|Q7ZY22_XENLA	29	C	16	16	smarcc1	Smarcc1 protein OS=Xenopus laevis GN=smarcc1 PE=2 SV=2	1226	8	5	3	5	6	5	4	5.5	1.375	0.459432	0.349886	0.456074
tr|Q6GPU5|Q6GPU5_XENLA	26	C	13	0	MGC82602	MGC82602 protein OS=Xenopus laevis GN=MGC82602 PE=2 SV=1	142	2	4	2	1	2	2	1.5	2	1.33333	0.415037	0.5	0.30103
tr|Q4VT51|Q4VT51_XENLA	28	C	27	0	fanca	Fanconi anemia complementation group A OS=Xenopus laevis GN=fanca PE=2 SV=1	1422	3	3	5	4	6	6	4.5	6	1.33333	0.415037	0.204833	0.688601
tr|A1L1G8|A1L1G8_XENLA	56	C	2	0	brd3	LOC100036838 protein OS=Xenopus laevis GN=brd3 PE=2 SV=1	783	0.5	0	0.5	1	1	1	0.75	1	1.33333	0.415037	0.5	0.30103
tr|Q7SYZ5|Q7SYZ5_XENLA	74	C	0	3	Hdac2	Hdac2 protein (Fragment) OS=Xenopus laevis GN=Hdac2 PE=2 SV=1	447	3	2	1	2	2	2	1.5	2	1.33333	0.415037	0.5	0.30103
sp|P25980|UBF1B_XENLA	105	C	0	64	ubtf-b	Nucleolar transcription factor 1-B OS=Xenopus laevis GN=ubtf-b PE=2 SV=1	701	11	11	7	11	13	11	9	12	1.33333	0.415037	0.349886	0.456074
tr|Q70YG6|Q70YG6_XENLA	155	C	0	10	cyp	Peptidyl-prolyl cis-trans isomerase (Fragment) OS=Xenopus laevis GN=cyp PE=2 SV=1	157	3	0	2	1	2	2	1.5	2	1.33333	0.415037	0.5	0.30103
tr|Q7ZWY6|Q7ZWY6_XENLA	160	C	5	0	rpl9	Rpl9-prov protein OS=Xenopus laevis GN=rpl9 PE=2 SV=1	192	1	1	0.5	1	2	0	0.75	1	1.33333	0.415037	0.845028	0.0731287
sp|P63282|UBC9_XENLA	187	C	5	0	ube2i	SUMO-conjugating enzyme UBC9 OS=Xenopus laevis GN=ube2i PE=1 SV=1	158	1	1	0.5	1	1	1	0.75	1	1.33333	0.415037	0.5	0.30103
tr|Q7SYZ0|Q7SYZ0_XENLA	222	C	20	0	vrk1	Vrk1-prov protein OS=Xenopus laevis GN=vrk1 PE=2 SV=1	144	3	3	3	3	5	3	3	4	1.33333	0.415037	0.5	0.30103
tr|Q698P6|Q698P6_XENLA	237	C	4	0	fancf	Fanconi anemia protein OS=Xenopus laevis GN=fancf PE=2 SV=1	339	0.5	1	0.5	1	1	1	0.75	1	1.33333	0.415037	0.5	0.30103
tr|Q8JGN6|Q8JGN6_XENLA	260	C	0	3		Protein inhibitor of activated STAT1 OS=Xenopus laevis PE=2 SV=1	649	0.5	0	0.5	1	1	1	0.75	1	1.33333	0.415037	0.5	0.30103
tr|Q6DFB2|Q6DFB2_XENLA	261	C	3	0	ercc4	Ercc4-prov protein OS=Xenopus laevis GN=ercc4 PE=2 SV=1	897	0.5	0	0.5	1	2	0	0.75	1	1.33333	0.415037	0.845028	0.0731287
sp|O57686|SMO1A_XENLA	322	C	0	4	sumo1-a	Small ubiquitin-related modifier 1-A OS=Xenopus laevis GN=sumo1-a PE=1 SV=1	102	0.5	1	0.5	1	1	1	0.75	1	1.33333	0.415037	0.5	0.30103
sp|Q9DE27|RUVB2_XENLA	58	C	0	23	ruvbl2	RuvB-like 2 OS=Xenopus laevis GN=ruvbl2 PE=2 SV=1	462	5	2	2	5	7	2	3.5	4.5	1.28571	0.36257	0.770513	0.11322
tr|Q0IH85|Q0IH85_XENLA	58	C	2	0	ruvbl2	LOC398205 protein OS=Xenopus laevis GN=ruvbl2 PE=2 SV=1	462	5	2	2	5	7	2	3.5	4.5	1.28571	0.36257	0.770513	0.11322
tr|Q640G9|Q640G9_XENLA	37	C	63	0	hcfc1	LOC494675 protein OS=Xenopus laevis GN=hcfc1 PE=2 SV=1	2101	9	13	7	11	13	10	9	11.5	1.27778	0.353637	0.429622	0.366914
tr|Q6INT0|Q6INT0_XENLA	61	C	33	169	top2a	DNA topoisomerase 2 OS=Xenopus laevis GN=top2a PE=2 SV=1	1579	39	37	25	31	36	34	28	35	1.25	0.321928	0.232776	0.633061
tr|Q6DFM0|Q6DFM0_XENLA	68	C	5	31	smarca5	ISWI protein OS=Xenopus laevis GN=smarca5 PE=1 SV=1	1046	4	5	5	7	11	4	6	7.5	1.25	0.321928	0.743351	0.128806
tr|Q8AVX7|Q8AVX7_XENLA	90	C	0	13	smarce1	Smarce1 protein OS=Xenopus laevis GN=smarce1 PE=2 SV=1	402	2	2	2	2	3	2	2	2.5	1.25	0.321928	0.5	0.30103
sp|P17507|EF1A2_XENLA	173	C	5	9	eef1ao	Elongation factor 1-alpha, oocyte form OS=Xenopus laevis GN=eef1ao PE=1 SV=1	461	2	3	1	3	3	2	2	2.5	1.25	0.321928	0.711723	0.147689
sp|P17508|EF1A3_XENLA	173	C	0	5		Elongation factor 1-alpha, oocyte form OS=Xenopus laevis PE=1 SV=2	461	2	3	2	2	3	2	2	2.5	1.25	0.321928	0.5	0.30103
tr|Q6IRP5|Q6IRP5_XENLA	227	C	1	0	krt19	MGC83069 protein OS=Xenopus laevis GN=krt19 PE=2 SV=1	412	1	1	2	2	2	3	2	2.5	1.25	0.321928	0.5	0.30103
tr|Q32NN1|Q32NN1_XENLA	15	C	43	0	recql	MGC131022 protein OS=Xenopus laevis GN=recql PE=2 SV=1	652	8	8	7	8	9	9	7.5	9	1.2	0.263034	0.204833	0.688601
tr|Q9PVV6|Q9PVV6_XENLA	146	C	0	10	set	TAF-Ibeta1 OS=Xenopus laevis GN=set PE=2 SV=1	278	3	2	0.5	2	1	2	1.25	1.5	1.2	0.263034	0.810892	0.0910368
tr|Q52L33|Q52L33_XENLA	210	C	2	0	smarcd3	MGC115001 protein OS=Xenopus laevis GN=smarcd3 PE=2 SV=1	369	1	2	0.5	2	2	1	1.25	1.5	1.2	0.263034	0.810892	0.0910368
tr|Q7ZTK6|Q7ZTK6_XENLA	42	C	0	68	hspa8	MGC53952 protein OS=Xenopus laevis GN=hspa8 PE=2 SV=1	646	17	17	13	13	18	13	13	15.5	1.19231	0.253757	0.5	0.30103
sp|Q9W602|SSRP1_XENLA	46	C	43	11	ssrp1	FACT complex subunit SSRP1 OS=Xenopus laevis GN=ssrp1 PE=1 SV=1	693	9	10	7	9	11	8	8	9.5	1.1875	0.247928	0.503838	0.297709
tr|Q5MMR9|Q5MMR9_XENLA	78	C	0	38		Brg1 OS=Xenopus laevis PE=2 SV=1	1600	7	7	5	6	8	5	5.5	6.5	1.18182	0.241008	0.62483	0.204238
tr|Q5HZF7|Q5HZF7_XENLA	44	C	15	0	MSH2	MSH2 protein (Fragment) OS=Xenopus laevis GN=MSH2 PE=2 SV=1	676	1	1	2	4	3	4	3	3.5	1.16667	0.222392	0.711723	0.147689
sp|P84233|H32_XENLA	123	C	0	19		Histone H3.2 OS=Xenopus laevis PE=1 SV=2	136	3	3	2	4	5	2	3	3.5	1.16667	0.222392	0.810892	0.0910368
tr|Q6NTX9|Q6NTX9_XENLA	145	C	17	0	sub1	MGC81442 protein OS=Xenopus laevis GN=sub1 PE=2 SV=1	128	3	1	3	3	3	4	3	3.5	1.16667	0.222392	0.5	0.30103
sp|P06900|H2B12_XENLA	32	C	1	0		Histone H2B 1.2 OS=Xenopus laevis PE=1 SV=2	126	5	5	6	7	7	8	6.5	7.5	1.15385	0.206451	0.292893	0.533291
sp|P02281|H2B11_XENLA	32	C	0	42		Histone H2B 1.1 OS=Xenopus laevis PE=1 SV=2	126	6	6	6	8	8	8	7	8	1.14286	0.192645	0.5	0.30103
sp|P02827|HSP70_XENLA	42	C	0	24		Heat shock 70 kDa protein OS=Xenopus laevis PE=2 SV=1	647	5	4	4	3	5	3	3.5	4	1.14286	0.192645	0.711723	0.147689
tr|Q6AZV1|Q6AZV1_XENLA	134	C	3	10	hsp90ab1	Hsp90beta OS=Xenopus laevis GN=hsp90ab1 PE=2 SV=1	722	4	2	0.5	3	3	1	1.75	2	1.14286	0.192645	0.890844	0.0501984
sp|P49393|RS13_XENLA	183	C	0	9	rps13	40S ribosomal protein S13 OS=Xenopus laevis GN=rps13 PE=3 SV=2	151	1	1	0.5	3	2	2	1.75	2	1.14286	0.192645	0.874334	0.0583226
tr|Q4QQP4|Q4QQP4_XENLA	6	C	28	0	rfc3	MGC115007 protein OS=Xenopus laevis GN=rfc3 PE=2 SV=1	356	4	3	4	6	7	4	5	5.5	1.1	0.137504	0.810892	0.0910368
tr|Q4V835|Q4V835_XENLA	60	C	2	79	hells	HELLS protein OS=Xenopus laevis GN=hells PE=2 SV=1	838	16	11	11	15	15	13	13	14	1.07692	0.106915	0.711723	0.147689
tr|Q5U4U8|Q5U4U8_XENLA	81	C	42	0	LOC495429	LOC495429 protein (Fragment) OS=Xenopus laevis GN=LOC495429 PE=2 SV=1	1378	7	8	5	8	8	6	6.5	7	1.07692	0.106915	0.810892	0.0910368
sp|P62799|H4_XENLA	67	C	19	29		Histone H4 OS=Xenopus laevis PE=1 SV=2	103	9	6	7	9	9	8	8	8.5	1.0625	0.0874628	0.711723	0.147689
tr|Q2TAH7|Q2TAH7_XENLA	0	C	1	0		Uncharacterized protein OS=Xenopus laevis PE=2 SV=1	508	7	10	9	9	10	9	9	9.5	1.05556	0.0780025	0.5	0.30103
tr|Q6GPM6|Q6GPM6_XENLA	51	C	13	69	FFA-1	FFA-1 protein OS=Xenopus laevis GN=FFA-1 PE=2 SV=1	1434	5	6	14	21	19	17	17.5	18	1.02857	0.040642	0.910628	0.0406589
sp|Q9W603|SP16H_XENLA	0	C	0	127	supt16h	FACT complex subunit SPT16 OS=Xenopus laevis GN=supt16h PE=1 SV=2	1035	15	20	21	25	28	18	23	23	1	0	1	0
tr|Q6NU65|Q6NU65_XENLA	17	C	4	0	rnaseh1	Ribonuclease H1 OS=Xenopus laevis GN=rnaseh1 PE=2 SV=1	300	0.5	0	1	1	2	0	1	1	1	0	1	0
sp|P06897|H2A1_XENLA	18	C	0	16		Histone H2A type 1 OS=Xenopus laevis PE=1 SV=2	130	3	3	3	2	3	2	2.5	2.5	1	0	1	0
tr|Q6PH89|Q6PH89_XENLA	18	C	0	2	hist1h2am	Histone H2A OS=Xenopus laevis GN=hist1h2am PE=2 SV=1	139	2	2	2	3	3	2	2.5	2.5	1	0	1	0
sp|Q9W6K1|MRE11_XENLA	19	C	48	0	mre11	Double-strand break repair protein MRE11 OS=Xenopus laevis GN=mre11 PE=2 SV=1	711	7	7	7	10	8	9	8.5	8.5	1	0	1	0
tr|Q76LD2|Q76LD2_XENLA	22	C	20	0	rfc4	RFC2 protein OS=Xenopus laevis GN=rfc4 PE=2 SV=1	363	3	3	4	3	4	3	3.5	3.5	1	0	1	0
tr|Q5PPZ3|Q5PPZ3_XENLA	30	C	3	0	LOC496036	LOC496036 protein OS=Xenopus laevis GN=LOC496036 PE=2 SV=1	217	1	0	0.5	1	0.5	1	0.75	0.75	1	0	1	0
tr|D2JYR7|D2JYR7_XENLA	31	C	58	0	fanci	Fanconi anemia complementation group I transcript variant 1 OS=Xenopus laevis GN=fanci PE=2 SV=1	1337	8	12	10	9	12	7	9.5	9.5	1	0	1	0
sp|Q52KW8|RCC2_XENLA	39	C	1	33	rcc2	Protein RCC2 homolog OS=Xenopus laevis GN=rcc2 PE=2 SV=1	513	5	5	7	5	7	5	6	6	1	0	1	0
tr|Q6PCF3|Q6PCF3_XENLA	45	C	6	0	MGC69166	MGC69166 protein OS=Xenopus laevis GN=MGC69166 PE=2 SV=1	304	1	1	0.5	2	0.5	2	1.25	1.25	1	0	1	0
sp|Q7ZYS8|RL10A_XENLA	52	C	0	10	rpl10a	60S ribosomal protein L10a OS=Xenopus laevis GN=rpl10a PE=2 SV=1	217	2	2	1	2	2	1	1.5	1.5	1	0	1	0
sp|P10995|ACT2_XENLA	55	C	0	21	act2	Actin, alpha skeletal muscle 2 OS=Xenopus laevis GN=act2 PE=2 SV=1	377	3	4	3	4	3	4	3.5	3.5	1	0	1	0
sp|P53505|ACT5_XENLA	55	C	0	16		Actin, cytoplasmic type 5 OS=Xenopus laevis PE=3 SV=1	376	6	7	5	6	4	7	5.5	5.5	1	0	1	0
tr|B7ZRE7|B7ZRE7_XENLA	72	C	0	22	BRCA1	Breast and ovarian cancer susceptibility protein OS=Xenopus laevis GN=BRCA1 PE=2 SV=1	1579	3	3	3	5	5	3	4	4	1	0	1	0
tr|Q7ZXT1|Q7ZXT1_XENLA	79	C	7	0	LOC398513	LOC398513 protein (Fragment) OS=Xenopus laevis GN=LOC398513 PE=2 SV=1	407	2	1	1	1	1	1	1	1	1	0	#DIV/0!	#DIV/0!
tr|Q2TAS5|Q2TAS5_XENLA	83	C	7	0	trim28	MGC130965 protein OS=Xenopus laevis GN=trim28 PE=2 SV=1	677	2	1	1	1	1	1	1	1	1	0	#DIV/0!	#DIV/0!
sp|Q6GNJ8|VPS72_XENLA	92	C	1	0	vps72	Vacuolar protein sorting-associated protein 72 homolog OS=Xenopus laevis GN=vps72 PE=2 SV=1	353	1	0	0.5	0	0.5	0	0.25	0.25	1	0	1	0
sp|Q8AVH1|RBBP7_XENLA	104	C	18	7	rbbp7	Histone-binding protein RBBP7 OS=Xenopus laevis GN=rbbp7 PE=2 SV=1	425	3	6	3	5	5	3	4	4	1	0	1	0
tr|Q6WSQ3|Q6WSQ3_XENLA	114	C	1	0	pole3	CHRAC17 protein OS=Xenopus laevis GN=pole3 PE=2 SV=1	147	1	0	0.5	0	0.5	0	0.25	0.25	1	0	1	0
tr|Q6GQ59|Q6GQ59_XENLA	115	C	7	7	MGC80325	MGC80325 protein OS=Xenopus laevis GN=MGC80325 PE=2 SV=1	335	2	2	1	4	3	2	2.5	2.5	1	0	1	0
tr|Q2NLA7|Q2NLA7_XENLA	116	C	3	32	parp1	Poly [ADP-ribose] polymerase OS=Xenopus laevis GN=parp1 PE=2 SV=1	1011	6	5	5	7	7	5	6	6	1	0	1	0
tr|A2BDC1|A2BDC1_XENLA	132	C	0	1	LOC494754	LOC494754 protein (Fragment) OS=Xenopus laevis GN=LOC494754 PE=2 SV=1	796	1	0	0.5	0	0.5	0	0.25	0.25	1	0	1	0
tr|Q91831|Q91831_XENLA	133	C	0	1		Alpha-tubulin OS=Xenopus laevis PE=2 SV=1	450	0.5	1	0.5	0	0.5	0	0.25	0.25	1	0	1	0
tr|Q7ZY06|Q7ZY06_XENLA	136	C	3	0	u2af2	U2af2 protein OS=Xenopus laevis GN=u2af2 PE=2 SV=2	456	0.5	1	1	0	1	0	0.5	0.5	1	0	1	0
tr|Q7SZT0|Q7SZT0_XENLA	147	C	0	2	eaf2	ELL associated factor 2 OS=Xenopus laevis GN=eaf2 PE=2 SV=1	250	1	1	0.5	0	0.5	0	0.25	0.25	1	0	1	0
tr|B7ZQY0|B7ZQY0_XENLA	150	C	0	1	LOC398655	Velo1 splice variant 1 OS=Xenopus laevis GN=LOC398655 PE=2 SV=1	779	1	0	0.5	0	0.5	0	0.25	0.25	1	0	1	0
sp|Q5BP74|KC1D_XENLA	156	C	0	4	csnk1d	Casein kinase I isoform delta OS=Xenopus laevis GN=csnk1d PE=1 SV=2	415	0.5	0	1	1	2	0	1	1	1	0	1	0
tr|A9JS62|A9JS62_XENLA	159	C	6	0	LOC100127317	LOC100127317 protein (Fragment) OS=Xenopus laevis GN=LOC100127317 PE=2 SV=1	580	0.5	2	2	0	1	1	1	1	1	0	1	0
tr|Q5XH43|Q5XH43_XENLA	175	C	1	0	srsf12	LOC495068 protein OS=Xenopus laevis GN=srsf12 PE=2 SV=1	251	1	0	0.5	0	0.5	0	0.25	0.25	1	0	1	0
tr|C8YR60|C8YR60_XENLA	178	C	3	0	cenpc	Centromere protein C OS=Xenopus laevis GN=cenpc PE=2 SV=1	1400	1	2	0.5	0	0.5	0	0.25	0.25	1	0	1	0
sp|Q52KV5|LEO1_XENLA	182	C	1	0	leo1	RNA polymerase-associated protein LEO1 OS=Xenopus laevis GN=leo1 PE=2 SV=1	703	0.5	1	0.5	0	0.5	0	0.25	0.25	1	0	1	0
tr|Q5XGV7|Q5XGV7_XENLA	189	C	1	0	ythdc1	LOC495129 protein OS=Xenopus laevis GN=ythdc1 PE=2 SV=1	704	1	0	0.5	0	0.5	0	0.25	0.25	1	0	1	0
sp|B6CHA3|UHRF1_XENLA	190	C	0	24	uhrf1	E3 ubiquitin-protein ligase UHRF1 OS=Xenopus laevis GN=uhrf1 PE=2 SV=1	772	3	3	5	4	6	3	4.5	4.5	1	0	1	0
tr|Q4QR44|Q4QR44_XENLA	191	C	5	0	rps15a	MGC114789 protein OS=Xenopus laevis GN=rps15a PE=2 SV=1	130	0.5	1	1	1	1	1	1	1	1	0	#DIV/0!	#DIV/0!
tr|Q498G8|Q498G8_XENLA	192	C	0	4		Uncharacterized protein OS=Xenopus laevis PE=2 SV=1	454	1	1	1	0	1	0	0.5	0.5	1	0	1	0
tr|Q7ZXK5|Q7ZXK5_XENLA	195	C	5	10	MGC52578	MGC52578 protein OS=Xenopus laevis GN=MGC52578 PE=2 SV=1	212	2	3	3	2	3	2	2.5	2.5	1	0	1	0
sp|O13024|INCEA_XENLA	198	C	2	1	incenp-a	Inner centromere protein A OS=Xenopus laevis GN=incenp-a PE=1 SV=1	873	2	1	0.5	0	0.5	0	0.25	0.25	1	0	1	0
sp|Q32N93|INCEB_XENLA	198	C	0	1	incenp-b	Inner centromere protein B OS=Xenopus laevis GN=incenp-b PE=2 SV=1	892	2	0	0.5	0	0.5	0	0.25	0.25	1	0	1	0
tr|Q6PI76|Q6PI76_XENLA	199	C	1	0	rps14	Rps14-prov protein OS=Xenopus laevis GN=rps14 PE=2 SV=1	151	0.5	1	0.5	0	0.5	0	0.25	0.25	1	0	1	0
tr|Q08AX4|Q08AX4_XENLA	205	C	0	1	LOC100158394	LOC100158394 protein OS=Xenopus laevis GN=LOC100158394 PE=2 SV=1	555	0.5	1	0.5	0	0.5	0	0.25	0.25	1	0	1	0
tr|Q5EWX9|Q5EWX9_XENLA	206	C	0	1		Nuclear pore protein pom121 OS=Xenopus laevis PE=2 SV=1	1050	0.5	1	0.5	0	0.5	0	0.25	0.25	1	0	1	0
sp|O93235|CIRBA_XENLA	215	C	5	0	cirbp-a	Cold-inducible RNA-binding protein A OS=Xenopus laevis GN=cirbp-a PE=1 SV=2	166	0.5	1	1	1	1	1	1	1	1	0	#DIV/0!	#DIV/0!
sp|Q68F18|MFN2B_XENLA	219	C	0	1	slc25a28-b	Mitoferrin-2B OS=Xenopus laevis GN=slc25a28-b PE=2 SV=1	186	0.5	1	0.5	0	0.5	0	0.25	0.25	1	0	1	0
tr|P70020|P70020_XENLA	220	C	1	0		Olfactory receptor (Fragment) OS=Xenopus laevis PE=3 SV=1	222	0.5	1	0.5	0	0.5	0	0.25	0.25	1	0	1	0
sp|P02537|K1C0_XENLA	227	C	0	10		Keratin-3, type I cytoskeletal 51 kDa OS=Xenopus laevis PE=2 SV=1	486	1	1	2	2	2	2	2	2	1	0	#DIV/0!	#DIV/0!
sp|P05782|K1C3_XENLA	227	C	0	21	xk81b1	Keratin, type I cytoskeletal 47 kDa (Fragment) OS=Xenopus laevis GN=xk81b1 PE=3 SV=2	280	3	4	3	4	4	3	3.5	3.5	1	0	1	0
tr|Q5XGU0|Q5XGU0_XENLA	227	C	0	6	krt17	LOC495266 protein OS=Xenopus laevis GN=krt17 PE=2 SV=1	452	2	2	2	2	2	2	2	2	1	0	#DIV/0!	#DIV/0!
tr|Q3B8M5|Q3B8M5_XENLA	228	C	0	7	XNop56	XNop56 protein OS=Xenopus laevis GN=XNop56 PE=2 SV=1	529	2	1	1	1	1	1	1	1	1	0	#DIV/0!	#DIV/0!
sp|Q6PAF4|NSE1_XENLA	230	C	6	0	nsmce1	Non-structural maintenance of chromosomes element 1 homolog OS=Xenopus laevis GN=nsmce1 PE=2 SV=1	270	1	1	1	1	1	1	1	1	1	0	#DIV/0!	#DIV/0!
sp|Q4V7H8|BORE2_XENLA	234	C	10	0	cdca9	Borealin-2 OS=Xenopus laevis GN=cdca9 PE=1 SV=1	296	2	2	1	2	2	1	1.5	1.5	1	0	1	0
sp|Q7T0S2|NUDC1_XENLA	235	C	1	0	nudcd1	NudC domain-containing protein 1 OS=Xenopus laevis GN=nudcd1 PE=2 SV=1	586	1	0	0.5	0	0.5	0	0.25	0.25	1	0	1	0
sp|P55863|SOX3A_XENLA	240	C	2	0	sox3-a	Transcription factor Sox-3-A OS=Xenopus laevis GN=sox3-a PE=1 SV=1	309	1	1	0.5	0	0.5	0	0.25	0.25	1	0	1	0
tr|A0AUU1|A0AUU1_XENLA	242	C	2	0	mlh1	LOC100036779 protein OS=Xenopus laevis GN=mlh1 PE=2 SV=1	750	1	1	0.5	0	0.5	0	0.25	0.25	1	0	1	0
tr|Q2KHP5|Q2KHP5_XENLA	244	C	2	0		Uncharacterized protein OS=Xenopus laevis PE=2 SV=1	391	1	1	0.5	0	0.5	0	0.25	0.25	1	0	1	0
tr|Q08B65|Q08B65_XENLA	251	C	1	0	tfdp2	LOC100158337 protein OS=Xenopus laevis GN=tfdp2 PE=2 SV=1	376	0.5	1	0.5	0	0.5	0	0.25	0.25	1	0	1	0
tr|Q6GPS0|Q6GPS0_XENLA	252	C	1	0	mdn1	MGC82653 protein OS=Xenopus laevis GN=mdn1 PE=2 SV=1	374	0.5	1	0.5	0	0.5	0	0.25	0.25	1	0	1	0
tr|Q8AY27|Q8AY27_XENLA	259	C	0	2	rad1	Checkpoint protein OS=Xenopus laevis GN=rad1 PE=2 SV=1	281	0.5	0	1	0	1	0	0.5	0.5	1	0	1	0
tr|Q5U248|Q5U248_XENLA	263	C	0	2	crebbp	LOC495689 protein OS=Xenopus laevis GN=crebbp PE=2 SV=1	2428	1	1	0.5	0	0.5	0	0.25	0.25	1	0	1	0
sp|Q6NUH0|RL31_XENLA	265	C	1	0	rpl31	60S ribosomal protein L31 OS=Xenopus laevis GN=rpl31 PE=2 SV=1	125	1	0	0.5	0	0.5	0	0.25	0.25	1	0	1	0
sp|P47830|RL27A_XENLA	273	C	0	1	rpl27a	60S ribosomal protein L27a OS=Xenopus laevis GN=rpl27a PE=2 SV=2	148	0.5	1	0.5	0	0.5	0	0.25	0.25	1	0	1	0
sp|Q4KLU2|PRP39_XENLA	275	C	5	0	prpf39	Pre-mRNA-processing factor 39 OS=Xenopus laevis GN=prpf39 PE=2 SV=1	641	1	0	1	1	1	1	1	1	1	0	#DIV/0!	#DIV/0!
sp|Q6NRW0|MTBP_XENLA	277	C	2	0	mtbp	Mdm2-binding protein OS=Xenopus laevis GN=mtbp PE=2 SV=1	860	1	1	0.5	0	0.5	0	0.25	0.25	1	0	1	0
tr|Q6NS25|Q6NS25_XENLA	281	C	1	0	ints2	MGC78791 protein OS=Xenopus laevis GN=ints2 PE=2 SV=1	1175	1	0	0.5	0	0.5	0	0.25	0.25	1	0	1	0
sp|Q52KD8|EAF6_XENLA	282	C	2	0	meaf6	Chromatin modification-related protein MEAF6 OS=Xenopus laevis GN=meaf6 PE=2 SV=1	188	1	1	0.5	0	0.5	0	0.25	0.25	1	0	1	0
sp|Q7T076|LSM11_XENLA	285	C	0	1	lsm11	U7 snRNA-associated Sm-like protein LSm11 OS=Xenopus laevis GN=lsm11 PE=2 SV=1	291	1	0	0.5	0	0.5	0	0.25	0.25	1	0	1	0
sp|A1L3I5|NSAPC_XENLA	296	C	0	1	nusap1-c	Nucleolar and spindle-associated protein 1-C OS=Xenopus laevis GN=nusap1-c PE=2 SV=2	525	1	0	0.5	0	0.5	0	0.25	0.25	1	0	1	0
tr|Q7SZF6|Q7SZF6_XENLA	297	C	1	0	vtgb1	Vitellogenin B1 OS=Xenopus laevis GN=vtgb1 PE=2 SV=1	1817	0.5	1	0.5	0	0.5	0	0.25	0.25	1	0	1	0
tr|Q2VPG6|Q2VPG6_XENLA	303	C	0	1		Uncharacterized protein OS=Xenopus laevis PE=2 SV=1	671	1	0	0.5	0	0.5	0	0.25	0.25	1	0	1	0
tr|Q90WJ2|Q90WJ2_XENLA	310	C	1	0	gnrhr	Gonadotropin-releasing hormone receptor type II OS=Xenopus laevis GN=gnrhr PE=2 SV=1	418	1	0	0.5	0	0.5	0	0.25	0.25	1	0	1	0
tr|Q6GPP8|Q6GPP8_XENLA	311	C	4	0	hba-l5	MGC82702 protein OS=Xenopus laevis GN=hba-l5 PE=2 SV=1	139	0.5	0	1	1	1	1	1	1	1	0	#DIV/0!	#DIV/0!
tr|Q6GQK3|Q6GQK3_XENLA	313	C	6	0	dpy30	MGC79089 protein OS=Xenopus laevis GN=dpy30 PE=2 SV=1	99	1	1	1	1	1	1	1	1	1	0	#DIV/0!	#DIV/0!
tr|Q0VA85|Q0VA85_XENLA	314	C	2	0	mki67	Mki67 protein (Fragment) OS=Xenopus laevis GN=mki67 PE=2 SV=1	2080	1	1	0.5	0	0.5	0	0.25	0.25	1	0	1	0
tr|Q4QR17|Q4QR17_XENLA	315	C	1	0	MGC114939	MGC114939 protein OS=Xenopus laevis GN=MGC114939 PE=2 SV=1	369	0.5	1	0.5	0	0.5	0	0.25	0.25	1	0	1	0
sp|Q7ZX03|FOXK2_XENLA	316	C	1	0	foxk2	Forkhead box protein K2 OS=Xenopus laevis GN=foxk2 PE=2 SV=2	642	0.5	1	0.5	0	0.5	0	0.25	0.25	1	0	1	0
tr|Q52KX4|Q52KX4_XENLA	317	C	1	0	MGC115008	MGC115008 protein OS=Xenopus laevis GN=MGC115008 PE=2 SV=1	873	1	0	0.5	0	0.5	0	0.25	0.25	1	0	1	0
tr|Q66KY6|Q66KY6_XENLA	326	C	5	0	rpl11	MGC85310 protein OS=Xenopus laevis GN=rpl11 PE=2 SV=1	177	0.5	1	1	1	1	1	1	1	1	0	#DIV/0!	#DIV/0!
sp|P28020|CSK21_XENLA	327	C	0	1	csnk2a1	Casein kinase II subunit alpha OS=Xenopus laevis GN=csnk2a1 PE=2 SV=2	392	1	0	0.5	0	0.5	0	0.25	0.25	1	0	1	0
tr|Q52L27|Q52L27_XENLA	328	C	2	0	LOC733207	LOC733207 protein (Fragment) OS=Xenopus laevis GN=LOC733207 PE=2 SV=1	1416	1	1	0.5	0	0.5	0	0.25	0.25	1	0	1	0
tr|A0A068EUV4|A0A068EUV4_XENLA	330	C	0	1	slx4	Structure specific endonuclease subunit SLX4 OS=Xenopus laevis GN=slx4 PE=2 SV=1	1777	1	0	0.5	0	0.5	0	0.25	0.25	1	0	1	0
sp|D3IUT5|TICRR_XENLA	331	C	1	0	ticrr	Treslin OS=Xenopus laevis GN=ticrr PE=1 SV=1	1985	0.5	1	0.5	0	0.5	0	0.25	0.25	1	0	1	0
sp|P51951|MAT1_XENLA	332	C	1	0	mnat1	CDK-activating kinase assembly factor MAT1 OS=Xenopus laevis GN=mnat1 PE=2 SV=1	309	0.5	1	0.5	0	0.5	0	0.25	0.25	1	0	1	0
tr|A0JMY9|A0JMY9_XENLA	334	C	2	0	hic2	Hic2 protein OS=Xenopus laevis GN=hic2 PE=2 SV=1	458	1	1	0.5	0	0.5	0	0.25	0.25	1	0	1	0
tr|Q91803|Q91803_XENLA	335	C	1	0	nolc1	Nucleolar phosphoprotein OS=Xenopus laevis GN=nolc1 PE=2 SV=1	990	1	0	0.5	0	0.5	0	0.25	0.25	1	0	1	0
tr|Q32NM8|Q32NM8_XENLA	337	C	2	0	u2af1	MGC131026 protein OS=Xenopus laevis GN=u2af1 PE=2 SV=1	245	1	1	0.5	0	0.5	0	0.25	0.25	1	0	1	0
sp|P70062|T7L1A_XENLA	339	C	0	2	tcf7l1-a	Transcription factor 7-like 1-A OS=Xenopus laevis GN=tcf7l1-a PE=1 SV=1	554	1	1	0.5	0	0.5	0	0.25	0.25	1	0	1	0
tr|Q7ZY59|Q7ZY59_XENLA	341	C	0	1		Clk2-prov protein OS=Xenopus laevis PE=2 SV=1	491	1	0	0.5	0	0.5	0	0.25	0.25	1	0	1	0
sp|P52170|IMA5_XENLA	342	C	0	1	kpna1	Importin subunit alpha-5 OS=Xenopus laevis GN=kpna1 PE=1 SV=2	522	1	0	0.5	0	0.5	0	0.25	0.25	1	0	1	0
tr|Q7ZTM8|Q7ZTM8_XENLA	343	C	0	1	LOC398448	LOC398448 protein (Fragment) OS=Xenopus laevis GN=LOC398448 PE=2 SV=1	306	0.5	1	0.5	0	0.5	0	0.25	0.25	1	0	1	0
sp|Q4FZQ6|PR38A_XENLA	345	C	0	1	prpf38a	Pre-mRNA-splicing factor 38A OS=Xenopus laevis GN=prpf38a PE=2 SV=1	312	0.5	1	0.5	0	0.5	0	0.25	0.25	1	0	1	0
tr|Q498J0|Q498J0_XENLA	347	C	0	1	LOC443677	LOC443677 protein (Fragment) OS=Xenopus laevis GN=LOC443677 PE=2 SV=1	491	1	0	0.5	0	0.5	0	0.25	0.25	1	0	1	0
tr|Q5XGV6|Q5XGV6_XENLA	348	C	1	0	trim24	LOC495130 protein OS=Xenopus laevis GN=trim24 PE=2 SV=1	439	1	0	0.5	0	0.5	0	0.25	0.25	1	0	1	0
tr|Q06459|Q06459_XENLA	111	C	0	6	ncl	Nucleolin OS=Xenopus laevis GN=ncl PE=2 SV=1	705	9	11	9	14	12	10	11.5	11	0.956522	-0.0641303	0.87723	0.0568864
tr|B7ZR96|B7ZR96_XENLA	111	C	3	19	LOC397919	LOC397919 protein OS=Xenopus laevis GN=LOC397919 PE=2 SV=1	704	8	11	9	13	12	9	11	10.5	0.954545	-0.0671142	0.861242	0.0648746
tr|D5MDW0|D5MDW0_XENLA	97	C	33	0	fancm	Fanconi anemia protein OS=Xenopus laevis GN=fancm PE=2 SV=1	2166	5	3	6	7	7	5	6.5	6	0.923077	-0.115477	0.711723	0.147689
sp|Q01588|RFA1_XENLA	8	C	1	127	rpa1	Replication protein A 70 kDa DNA-binding subunit OS=Xenopus laevis GN=rpa1 PE=1 SV=1	609	19	15	23	26	23	22	24.5	22.5	0.918367	-0.122857	0.39587	0.402447
tr|A9UMQ0|A9UMQ0_XENLA	197	C	27	0	pnkp	LOC100137702 protein OS=Xenopus laevis GN=pnkp PE=2 SV=1	548	4	4	5	5	5	4	5	4.5	0.9	-0.152003	0.5	0.30103
sp|Q91636|KIF2C_XENLA	124	C	26	0	kif2c	Kinesin-like protein KIF2C OS=Xenopus laevis GN=kif2c PE=1 SV=2	730	4	5	4	5	5	3	4.5	4	0.888889	-0.169925	0.711723	0.147689
sp|P23787|TERA_XENLA	20	C	62	6	vcp	Transitional endoplasmic reticulum ATPase OS=Xenopus laevis GN=vcp PE=1 SV=3	805	11	10	12	13	12	10	12.5	11	0.88	-0.184425	0.349886	0.456074
tr|Q4VT50|Q4VT50_XENLA	53	C	69	0	fancd2	Fanconi anemia complementation group D2 OS=Xenopus laevis GN=fancd2 PE=2 SV=1	1443	11	11	10	15	13	9	12.5	11	0.88	-0.184425	0.687459	0.162753
tr|A6YGN3|A6YGN3_XENLA	245	C	0	22	FANCG	Fanconi anemia complementation group G variant 2 OS=Xenopus laevis GN=FANCG PE=2 SV=1	591	3	4	3	5	3	4	4	3.5	0.875	-0.192645	0.711723	0.147689
tr|Q6NRU3|Q6NRU3_XENLA	65	C	20	0	rfc2	MGC81391 protein OS=Xenopus laevis GN=rfc2 PE=2 SV=1	348	4	3	4	3	3	3	3.5	3	0.857143	-0.222392	0.5	0.30103
tr|C4N9Q9|C4N9Q9_XENLA	85	C	13	38	rad50	Rad50 OS=Xenopus laevis GN=rad50 PE=2 SV=1	1312	7	5	10	11	10	8	10.5	9	0.857143	-0.222392	0.349886	0.456074
tr|A1L3F9|A1L3F9_XENLA	38	C	0	14	LOC100036995	LOC100036995 protein (Fragment) OS=Xenopus laevis GN=LOC100036995 PE=2 SV=1	583	2	1	2	4	3	2	3	2.5	0.833333	-0.263034	0.711723	0.147689
tr|Q6XV80|Q6XV80_XENLA	119	C	2	14	nbn	Nibrin OS=Xenopus laevis GN=nbn PE=1 SV=1	763	2	3	2	4	2	3	3	2.5	0.833333	-0.263034	0.711723	0.147689
tr|B1H1P5|B1H1P5_XENLA	40	C	2	12	LOC100158273	LOC100158273 protein (Fragment) OS=Xenopus laevis GN=LOC100158273 PE=2 SV=1	1115	2	3	3	2	2	2	2.5	2	0.8	-0.321928	0.5	0.30103
tr|Q7ZX99|Q7ZX99_XENLA	63	C	0	1	Tia1	Tia1 protein (Fragment) OS=Xenopus laevis GN=Tia1 PE=2 SV=1	427	1	1	0.5	2	1	1	1.25	1	0.8	-0.321928	0.795167	0.0995415
tr|Q802C4|Q802C4_XENLA	69	C	15	0	brd7	BRD7 protein OS=Xenopus laevis GN=brd7 PE=2 SV=1	638	3	3	3	2	3	1	2.5	2	0.8	-0.321928	0.711723	0.147689
sp|Q6DDH2|RMI1_XENLA	93	C	9	0	rmi1	RecQ-mediated genome instability protein 1 OS=Xenopus laevis GN=rmi1 PE=2 SV=1	557	0.5	0	2	3	4	0	2.5	2	0.8	-0.321928	0.845028	0.0731287
tr|Q7ZTM5|Q7ZTM5_XENLA	115	C	6	0	rfc5	Rfc5-prov protein OS=Xenopus laevis GN=rfc5 PE=2 SV=1	335	2	2	3	2	2	2	2.5	2	0.8	-0.321928	0.5	0.30103
tr|Q802A8|Q802A8_XENLA	226	C	0	13	cbx3	Cbx3 protein OS=Xenopus laevis GN=cbx3 PE=2 SV=1	174	2	2	2	3	2	2	2.5	2	0.8	-0.321928	0.5	0.30103
tr|Q4VT49|Q4VT49_XENLA	324	C	11	0	fancl	Fanconi anemia complementation group L OS=Xenopus laevis GN=fancl PE=2 SV=1	372	0.5	2	3	2	2	2	2.5	2	0.8	-0.321928	0.5	0.30103
sp|P20397|NUCL_XENLA	111	C	10	40	ncl	Nucleolin OS=Xenopus laevis GN=ncl PE=2 SV=3	651	8	8	7	12	8	7	9.5	7.5	0.789474	-0.341037	0.568501	0.245269
sp|Q498E7|SMAL1_XENLA	113	C	45	4	smarcal1	SWI/SNF-related matrix-associated actin-dependent regulator of chromatin subfamily A-like protein 1 OS=Xenopus laevis GN=smarcal1 PE=2 SV=1	960	4	4	13	10	11	7	11.5	9	0.782609	-0.353637	0.429622	0.366914
tr|Q90X95|Q90X95_XENLA	117	C	0	10	bard1	BRCA1-associated RING domain protein OS=Xenopus laevis GN=bard1 PE=1 SV=1	772	2	1	1	3	1	2	2	1.5	0.75	-0.415037	0.711723	0.147689
sp|P70032|PLK1_XENLA	168	C	9	0	plk1	Serine/threonine-protein kinase PLK1 OS=Xenopus laevis GN=plk1 PE=1 SV=1	598	1	1	2	2	1	2	2	1.5	0.75	-0.415037	0.5	0.30103
tr|Q6AZV6|Q6AZV6_XENLA	186	C	4	3	myst2	Histone acetyltransferase OS=Xenopus laevis GN=myst2 PE=2 SV=1	553	2	2	1	1	0.5	1	1	0.75	0.75	-0.415037	0.5	0.30103
tr|Q66IP7|Q66IP7_XENLA	210	C	6	6	smarcd2	MGC86299 protein OS=Xenopus laevis GN=smarcd2 PE=2 SV=1	465	2	3	1	3	2	1	2	1.5	0.75	-0.415037	0.711723	0.147689
sp|P70040|FEN1A_XENLA	223	C	0	9	fen1-a	Flap endonuclease 1-A OS=Xenopus laevis GN=fen1-a PE=1 SV=1	382	0.5	2	1	3	2	1	2	1.5	0.75	-0.415037	0.711723	0.147689
tr|Q7ZYN9|Q7ZYN9_XENLA	227	C	5	0		MGC53311 protein OS=Xenopus laevis PE=2 SV=1	375	2	2	2	2	1	2	2	1.5	0.75	-0.415037	0.5	0.30103
sp|Q6GLW1|THO4B_XENLA	286	C	6	1	alyref-b	THO complex subunit 4-B OS=Xenopus laevis GN=alyref-b PE=2 SV=1	256	1	3	1	1	0.5	1	1	0.75	0.75	-0.415037	0.5	0.30103
sp|P18248|PCNA_XENLA	9	C	0	23	pcna	Proliferating cell nuclear antigen OS=Xenopus laevis GN=pcna PE=2 SV=1	261	3	1	5	6	4	4	5.5	4	0.727273	-0.459432	0.204833	0.688601
tr|Q8UVU2|Q8UVU2_XENLA	36	C	0	15	lig3	DNA ligase OS=Xenopus laevis GN=lig3 PE=2 SV=1	988	0.5	3	3	4	3	2	3.5	2.5	0.714286	-0.485427	0.292893	0.533291
tr|Q6DCZ1|Q6DCZ1_XENLA	86	C	13	0	pola2	DNA polymerase alpha subunit B OS=Xenopus laevis GN=pola2 PE=2 SV=1	598	0.5	1	2	5	3	2	3.5	2.5	0.714286	-0.485427	0.62483	0.204238
sp|Q6IP18|RFA2A_XENLA	13	C	20	0	rpa2-a	Replication protein A 32 kDa subunit-A OS=Xenopus laevis GN=rpa2-a PE=1 SV=1	276	4	4	9	8	7	5	8.5	6	0.705882	-0.5025	0.198727	0.701742
sp|A1L2H9|RFA2B_XENLA	13	C	6	17	rpa2-b	Replication protein A 32 kDa subunit-B OS=Xenopus laevis GN=rpa2-b PE=2 SV=1	274	3	3	5	5	4	3	5	3.5	0.7	-0.514573	0.204833	0.688601
sp|Q9DE14|ATR_XENLA	11	C	88	23	atr	Serine/threonine-protein kinase atr OS=Xenopus laevis GN=atr PE=1 SV=2	2654	14	11	25	26	21	14	25.5	17.5	0.686275	-0.543142	0.257059	0.589967
tr|I6N3H5|I6N3H5_XENLA	64	C	5	0	Rif1	Rif1 protein OS=Xenopus laevis GN=Rif1 PE=2 SV=1	2327	2	1	0.5	1	1	0	0.75	0.5	0.666667	-0.584963	0.711723	0.147689
tr|Q4V7T0|Q4V7T0_XENLA	82	C	0	6	Mta2	Mta2 protein OS=Xenopus laevis GN=Mta2 PE=2 SV=1	669	2	2	0.5	1	1	0	0.75	0.5	0.666667	-0.584963	0.711723	0.147689
tr|Q6IP16|Q6IP16_XENLA	91	C	4	0	dnttip1	MGC79023 protein OS=Xenopus laevis GN=dnttip1 PE=2 SV=1	309	1	1	0.5	1	1	0	0.75	0.5	0.666667	-0.584963	0.711723	0.147689
tr|B1WBA5|B1WBA5_XENLA	98	C	0	2	LOC100036795	DNA (cytosine-5)-methyltransferase OS=Xenopus laevis GN=LOC100036795 PE=2 SV=1	1492	0.5	0	0.5	1	1	0	0.75	0.5	0.666667	-0.584963	0.711723	0.147689
sp|Q6NRT3|SMU1_XENLA	101	C	2	0	smu1	WD40 repeat-containing protein SMU1 OS=Xenopus laevis GN=smu1 PE=2 SV=1	513	0.5	0	0.5	1	1	0	0.75	0.5	0.666667	-0.584963	0.711723	0.147689
tr|Q7SYX0|Q7SYX0_XENLA	102	C	2	0	serpina1	Serpina1d-prov protein OS=Xenopus laevis GN=serpina1 PE=2 SV=1	432	0.5	0	0.5	1	1	0	0.75	0.5	0.666667	-0.584963	0.711723	0.147689
tr|B1H1W4|B1H1W4_XENLA	106	C	8	0	men1	LOC100158320 protein OS=Xenopus laevis GN=men1 PE=2 SV=1	675	1	2	2	1	1	1	1.5	1	0.666667	-0.584963	0.5	0.30103
sp|Q8QHA5|DNA2_XENLA	108	C	7	0	dna2	DNA replication ATP-dependent helicase/nuclease DNA2 OS=Xenopus laevis GN=dna2 PE=1 SV=1	1053	1	1	1	2	1	1	1.5	1	0.666667	-0.584963	0.5	0.30103
tr|Q6NRK0|Q6NRK0_XENLA	127	C	4	0	asap2	MGC83760 protein OS=Xenopus laevis GN=asap2 PE=2 SV=1	1029	1	1	0.5	1	1	0	0.75	0.5	0.666667	-0.584963	0.711723	0.147689
tr|Q52KD5|Q52KD5_XENLA	137	C	8	0	LOC733229	LOC733229 protein (Fragment) OS=Xenopus laevis GN=LOC733229 PE=2 SV=1	294	2	1	1	2	1	1	1.5	1	0.666667	-0.584963	0.5	0.30103
tr|Q6AZV3|Q6AZV3_XENLA	143	C	0	2	rpl17	MGC78885 protein OS=Xenopus laevis GN=rpl17 PE=2 SV=1	184	0.5	0	0.5	1	1	0	0.75	0.5	0.666667	-0.584963	0.711723	0.147689
sp|Q7ZXH2|NSE2_XENLA	144	C	2	0	nsmce2	E3 SUMO-protein ligase NSE2 OS=Xenopus laevis GN=nsmce2 PE=2 SV=1	238	0.5	0	0.5	1	1	0	0.75	0.5	0.666667	-0.584963	0.711723	0.147689
tr|Q7ZXD0|Q7ZXD0_XENLA	164	C	0	2		MGC53266 protein OS=Xenopus laevis PE=2 SV=1	581	0.5	0	0.5	1	1	0	0.75	0.5	0.666667	-0.584963	0.711723	0.147689
tr|B1WBC6|B1WBC6_XENLA	174	C	3	0	atad2b	LOC100158428 protein OS=Xenopus laevis GN=atad2b PE=2 SV=1	872	1	0	0.5	1	1	0	0.75	0.5	0.666667	-0.584963	0.711723	0.147689
tr|Q6ING8|Q6ING8_XENLA	283	C	2	0	ung	Uracil-DNA glycosylase OS=Xenopus laevis GN=ung PE=2 SV=1	304	0.5	0	0.5	1	1	0	0.75	0.5	0.666667	-0.584963	0.711723	0.147689
sp|P20911|CDK7_XENLA	298	C	5	0	cdk7	Cyclin-dependent kinase 7 OS=Xenopus laevis GN=cdk7 PE=1 SV=1	352	2	1	0.5	1	1	0	0.75	0.5	0.666667	-0.584963	0.711723	0.147689
sp|Q7SZ22|SUMO3_XENLA	302	C	1	3	sumo3	Small ubiquitin-related modifier 3 OS=Xenopus laevis GN=sumo3 PE=3 SV=1	94	0.5	2	0.5	1	1	0	0.75	0.5	0.666667	-0.584963	0.711723	0.147689
sp|Q7T0M6|AS1AB_XENLA	321	C	3	0	asf1ab	Histone chaperone asf1a-B OS=Xenopus laevis GN=asf1ab PE=2 SV=1	200	0.5	1	0.5	1	1	0	0.75	0.5	0.666667	-0.584963	0.711723	0.147689
tr|Q8AY70|Q8AY70_XENLA	323	C	3	0	gapdh	Glyceraldehyde-3-phosphate dehydrogenase OS=Xenopus laevis GN=gapdh PE=2 SV=1	333	1	0	0.5	1	1	0	0.75	0.5	0.666667	-0.584963	0.711723	0.147689
sp|P25183|RCC1_XENLA	336	C	0	3	rcc1	Regulator of chromosome condensation OS=Xenopus laevis GN=rcc1 PE=2 SV=1	424	1	0	0.5	1	1	0	0.75	0.5	0.666667	-0.584963	0.711723	0.147689
tr|Q642R8|Q642R8_XENLA	109	C	0	35	pold1	DNA polymerase OS=Xenopus laevis GN=pold1 PE=2 SV=1	1109	4	3	8	9	7	4	8.5	5.5	0.647059	-0.628031	0.27259	0.564491
tr|Q5U510|Q5U510_XENLA	49	C	29	5	rpa3	LOC495401 protein OS=Xenopus laevis GN=rpa3 PE=2 SV=1	121	6	5	7	7	5	4	7	4.5	0.642857	-0.63743	0.125666	0.900782
tr|Q5HZL6|Q5HZL6_XENLA	54	C	29	0	LOC496363	LOC496363 protein (Fragment) OS=Xenopus laevis GN=LOC496363 PE=2 SV=1	517	3	3	8	6	6	3	7	4.5	0.642857	-0.63743	0.316379	0.499792
sp|Q800K6|TOB1A_XENLA	3	C	14	67	topbp1-A	DNA topoisomerase 2-binding protein 1-A OS=Xenopus laevis GN=topbp1-A PE=1 SV=2	1513	14	8	19	17	12	11	18	11.5	0.638889	-0.646363	0.0546643	1.2623
sp|Q9DE46|DPOLA_XENLA	126	C	0	27	pola1	DNA polymerase alpha catalytic subunit OS=Xenopus laevis GN=pola1 PE=1 SV=1	1458	3	3	7	6	5	3	6.5	4	0.615385	-0.70044	0.198727	0.701742
tr|A0JMV0|A0JMV0_XENLA	148	C	0	11	MGC154789	MGC154789 protein OS=Xenopus laevis GN=MGC154789 PE=2 SV=1	305	2	1	1	4	2	1	2.5	1.5	0.6	-0.736966	0.62483	0.204238
tr|D2CGM1|D2CGM1_XENLA	153	C	8	0	fancc	Fanconi anemia complementation group C OS=Xenopus laevis GN=fancc PE=2 SV=1	541	0.5	0	2	3	2	1	2.5	1.5	0.6	-0.736966	0.292893	0.533291
tr|Q2TAV4|Q2TAV4_XENLA	94	C	7	3	prpf3	LOC443589 protein OS=Xenopus laevis GN=prpf3 PE=2 SV=1	679	5	0	0.5	3	1	1	1.75	1	0.571429	-0.807355	0.655958	0.183124
sp|O93610|DPOD2_XENLA	130	C	14	0	pold2	DNA polymerase delta subunit 2 OS=Xenopus laevis GN=pold2 PE=2 SV=1	463	3	0	3	4	2	2	3.5	2	0.571429	-0.807355	0.204833	0.688601
tr|Q5FWN5|Q5FWN5_XENLA	16	C	10	0	msh6	MGC85188 protein OS=Xenopus laevis GN=msh6 PE=2 SV=1	1340	1	0	1	5	3	0	3	1.5	0.5	-1	0.613571	0.212135
sp|Q91918|RA51A_XENLA	34	C	9	4	rad51-a	DNA repair protein RAD51 homolog A OS=Xenopus laevis GN=rad51-a PE=2 SV=1	336	2	2	3	3	2	1	3	1.5	0.5	-1	0.204833	0.688601
sp|Q805A1|SMC5_XENLA	35	C	27	0	smc5	Structural maintenance of chromosomes protein 5 OS=Xenopus laevis GN=smc5 PE=2 SV=1	1065	3	3	7	7	4	3	7	3.5	0.5	-1	0.0903345	1.04415
sp|Q6DDV8|TPX2B_XENLA	41	C	1	0	tpx2-b	Targeting protein for Xklp2-B OS=Xenopus laevis GN=tpx2-b PE=2 SV=1	715	0.5	1	1	0	0.5	0	0.5	0.25	0.5	-1	0.711723	0.147689
sp|Q6P9I7|SMC6_XENLA	100	C	23	0	smc6	Structural maintenance of chromosomes protein 6 OS=Xenopus laevis GN=smc6 PE=2 SV=1	1128	3	2	4	8	4	2	6	3	0.5	-1	0.349886	0.456074
sp|Q5EAW4|MCM10_XENLA	121	C	7	0	mcm10	Protein MCM10 homolog OS=Xenopus laevis GN=mcm10 PE=1 SV=2	860	0.5	1	2	2	1	1	2	1	0.5	-1	#DIV/0!	#DIV/0!
tr|Q6INF9|Q6INF9_XENLA	141	C	6	0	gtf2h4	MGC83106 protein OS=Xenopus laevis GN=gtf2h4 PE=2 SV=1	455	2	1	1	1	1	0	1	0.5	0.5	-1	0.5	0.30103
sp|Q5XGU5|DNJ6B_XENLA	151	C	0	2	dnajb6-b	DnaJ homolog subfamily B member 6-B OS=Xenopus laevis GN=dnajb6-b PE=2 SV=1	245	0.5	1	1	0	0.5	0	0.5	0.25	0.5	-1	0.711723	0.147689
sp|Q9DED4|CIRBB_XENLA	176	C	5	0	cirbp-b	Cold-inducible RNA-binding protein B OS=Xenopus laevis GN=cirbp-b PE=1 SV=1	166	1	1	1	1	1	0	1	0.5	0.5	-1	0.5	0.30103
sp|P15308|B4_XENLA	180	C	0	6	b4	Protein B4 OS=Xenopus laevis GN=b4 PE=1 SV=1	273	1	2	1	1	1	0	1	0.5	0.5	-1	0.5	0.30103
tr|A6H8J3|A6H8J3_XENLA	185	C	0	8	dclre1a	LOC733261 protein OS=Xenopus laevis GN=dclre1a PE=2 SV=1	932	1	1	1	3	1	1	2	1	0.5	-1	0.5	0.30103
tr|Q569U5|Q569U5_XENLA	232	C	4	0	LOC733188	LOC733188 protein (Fragment) OS=Xenopus laevis GN=LOC733188 PE=2 SV=1	1143	0.5	1	1	1	1	0	1	0.5	0.5	-1	0.5	0.30103
tr|Q3KQ13|Q3KQ13_XENLA	246	C	10	0	MGC131121	MGC131121 protein OS=Xenopus laevis GN=MGC131121 PE=2 SV=1	378	2	2	2	2	1	1	2	1	0.5	-1	#DIV/0!	#DIV/0!
sp|Q5XH61|BCL7A_XENLA	340	C	0	1	bcl7a	B-cell CLL/lymphoma 7 protein family member A OS=Xenopus laevis GN=bcl7a PE=2 SV=1	231	0.5	0	1	0	0.5	0	0.5	0.25	0.5	-1	0.711723	0.147689
tr|Q2VPN3|Q2VPN3_XENLA	350	C	0	1	h1fx	H1fx protein OS=Xenopus laevis GN=h1fx PE=2 SV=1	218	0.5	0	1	0	0.5	0	0.5	0.25	0.5	-1	0.711723	0.147689
sp|Q6GNV6|COM1_XENLA	14	C	13	0	rbbp8	DNA endonuclease RBBP8 OS=Xenopus laevis GN=rbbp8 PE=1 SV=1	856	2	1	3	4	2	1	3.5	1.5	0.428571	-1.22239	0.105573	0.976448
tr|B7ZR97|B7ZR97_XENLA	119	C	0	1	LOC403373	Nibrin OS=Xenopus laevis GN=LOC403373 PE=2 SV=1	762	2	3	2	5	1	2	3.5	1.5	0.428571	-1.22239	0.39587	0.402447
tr|Q8JHD8|Q8JHD8_XENLA	201	C	0	11	Hus1	Checkpoint protein Hus1 OS=Xenopus laevis GN=Hus1 PE=2 SV=1	282	1	0	4	3	2	1	3.5	1.5	0.428571	-1.22239	0.105573	0.976448
tr|Q7ZXV9|Q7ZXV9_XENLA	128	C	7	0	pms1	Pms1 protein OS=Xenopus laevis GN=pms1 PE=2 SV=1	925	0.5	0	3	2	1	1	2.5	1	0.4	-1.32193	0.204833	0.688601
sp|A8DZJ1|BAZ1B_XENLA	177	C	1	3	baz1b	Tyrosine-protein kinase BAZ1B OS=Xenopus laevis GN=baz1b PE=2 SV=2	1441	0.5	1	0.5	2	1	0	1.25	0.5	0.4	-1.32193	0.503838	0.297709
sp|O13046|WDHD1_XENLA	179	C	0	26	wdhd1	WD repeat and HMG-box DNA-binding protein 1 OS=Xenopus laevis GN=wdhd1 PE=1 SV=1	1127	3	2	6	9	5	1	7.5	3	0.4	-1.32193	0.223433	0.650854
sp|Q58EA2|THO4A_XENLA	286	C	3	0	alyref-a	THO complex subunit 4-A OS=Xenopus laevis GN=alyref-a PE=2 SV=1	256	0.5	1	0.5	2	1	0	1.25	0.5	0.4	-1.32193	0.503838	0.297709
tr|Q6EKW2|Q6EKW2_XENLA	66	C	0	4	RAD26	Rad26 OS=Xenopus laevis GN=RAD26 PE=2 SV=1	798	1	1	2	6	2	1	4	1.5	0.375	-1.41504	0.421436	0.375268
tr|Q58M12|Q58M12_XENLA	10	C	0	1		DNA polymerase kappa OS=Xenopus laevis PE=2 SV=1	862	0.5	0	0.5	1	0.5	0	0.75	0.25	0.333333	-1.58496	0.292893	0.533291
tr|Q7ZZU5|Q7ZZU5_XENLA	33	C	10	0	rad9a	PCNA-like DNA checkpoint protein Rad9 OS=Xenopus laevis GN=rad9a PE=2 SV=1	377	1	1	3	3	1	1	3	1	0.333333	-1.58496	#DIV/0!	#DIV/0!
tr|Q5XH69|Q5XH69_XENLA	47	C	1	0	LOC495053	LOC495053 protein (Fragment) OS=Xenopus laevis GN=LOC495053 PE=2 SV=1	1315	0.5	0	0.5	1	0.5	0	0.75	0.25	0.333333	-1.58496	0.292893	0.533291
sp|P30883|TBB4_XENLA	59	C	0	2	tubb4	Tubulin beta-4 chain OS=Xenopus laevis GN=tubb4 PE=2 SV=1	445	0.5	1	0.5	1	0.5	0	0.75	0.25	0.333333	-1.58496	0.292893	0.533291
tr|Q5SDB4|Q5SDB4_XENLA	66	C	0	10	atrip	ATR-interacting protein OS=Xenopus laevis GN=atrip PE=2 SV=1	801	1	1	2	4	1	1	3	1	0.333333	-1.58496	0.295167	0.529932
sp|Q3KPW1|RNP1B_XENLA	77	C	0	1	rnps1-b	RNA-binding protein with serine-rich domain 1-B OS=Xenopus laevis GN=rnps1-b PE=2 SV=1	283	0.5	0	0.5	1	0.5	0	0.75	0.25	0.333333	-1.58496	0.292893	0.533291
tr|Q7ZTM1|Q7ZTM1_XENLA	89	C	2	0	ppil2	Ppil2 protein OS=Xenopus laevis GN=ppil2 PE=2 SV=1	521	1	0	0.5	1	0.5	0	0.75	0.25	0.333333	-1.58496	0.292893	0.533291
tr|Q7ZX12|Q7ZX12_XENLA	95	C	4	0	gtf2h1	Gtf2h1-prov protein OS=Xenopus laevis GN=gtf2h1 PE=2 SV=1	532	2	1	0.5	1	0.5	0	0.75	0.25	0.333333	-1.58496	0.292893	0.533291
sp|Q4KLQ5|WDR76_XENLA	129	C	1	0	wdr76	WD repeat-containing protein 76 OS=Xenopus laevis GN=wdr76 PE=2 SV=1	580	0.5	0	0.5	1	0.5	0	0.75	0.25	0.333333	-1.58496	0.292893	0.533291
tr|Q641D1|Q641D1_XENLA	149	C	2	0	dmap1	MGC82015 protein OS=Xenopus laevis GN=dmap1 PE=2 SV=1	464	1	0	0.5	1	0.5	0	0.75	0.25	0.333333	-1.58496	0.292893	0.533291
tr|Q6DE09|Q6DE09_XENLA	161	C	3	0	eif4enif1	Eif4enif1-prov protein OS=Xenopus laevis GN=eif4enif1 PE=2 SV=1	771	2	0	0.5	1	0.5	0	0.75	0.25	0.333333	-1.58496	0.292893	0.533291
sp|Q283Q6|DBF4B_XENLA	170	C	0	3	dbf4b	Protein DBF4 homolog B OS=Xenopus laevis GN=dbf4b PE=1 SV=1	784	1	1	0.5	1	0.5	0	0.75	0.25	0.333333	-1.58496	0.292893	0.533291
tr|Q50JE6|Q50JE6_XENLA	171	C	0	2	wrnip1	Werner helicase interacting protein 1 OS=Xenopus laevis GN=wrnip1 PE=2 SV=1	572	1	0	0.5	1	0.5	0	0.75	0.25	0.333333	-1.58496	0.292893	0.533291
tr|Q6GQF0|Q6GQF0_XENLA	172	C	2	0	trafd1	MGC80116 protein OS=Xenopus laevis GN=trafd1 PE=2 SV=1	606	1	0	0.5	1	0.5	0	0.75	0.25	0.333333	-1.58496	0.292893	0.533291
tr|Q6DDP9|Q6DDP9_XENLA	179	C	1	0	wdhd1	Wdhd1 protein (Fragment) OS=Xenopus laevis GN=wdhd1 PE=2 SV=1	871	1	1	4	5	3	0	4.5	1.5	0.333333	-1.58496	0.27259	0.564491
tr|Q4FZN2|Q4FZN2_XENLA	193	C	0	4	rnaseh2a	Ribonuclease OS=Xenopus laevis GN=rnaseh2a PE=2 SV=1	302	0.5	0	2	1	1	0	1.5	0.5	0.333333	-1.58496	0.292893	0.533291
tr|Q66KX3|Q66KX3_XENLA	229	C	1	0	rpl23a	MGC85348 protein OS=Xenopus laevis GN=rpl23a PE=2 SV=1	155	0.5	0	0.5	1	0.5	0	0.75	0.25	0.333333	-1.58496	0.292893	0.533291
tr|Q6DKB4|Q6DKB4_XENLA	243	C	0	3	MGC84691	MGC84691 protein OS=Xenopus laevis GN=MGC84691 PE=2 SV=1	536	1	1	0.5	1	0.5	0	0.75	0.25	0.333333	-1.58496	0.292893	0.533291
tr|Q58M11|Q58M11_XENLA	247	C	0	1		DNA polymerase eta OS=Xenopus laevis PE=2 SV=1	684	0.5	0	0.5	1	0.5	0	0.75	0.25	0.333333	-1.58496	0.292893	0.533291
tr|Q6AZL7|Q6AZL7_XENLA	272	C	2	0	rps26	MGC86356 protein OS=Xenopus laevis GN=rps26 PE=2 SV=1	115	1	0	0.5	1	0.5	0	0.75	0.25	0.333333	-1.58496	0.292893	0.533291
tr|Q4V7G6|Q4V7G6_XENLA	289	C	1	0	MGC115729	MGC115729 protein OS=Xenopus laevis GN=MGC115729 PE=2 SV=1	240	0.5	0	0.5	1	0.5	0	0.75	0.25	0.333333	-1.58496	0.292893	0.533291
tr|Q6AXA7|Q6AXA7_XENLA	291	C	2	0	prpf6	MGC80263 protein OS=Xenopus laevis GN=prpf6 PE=2 SV=1	948	1	0	0.5	1	0.5	0	0.75	0.25	0.333333	-1.58496	0.292893	0.533291
tr|Q2TAF1|Q2TAF1_XENLA	294	C	1	0	thrap3	Thrap3 protein OS=Xenopus laevis GN=thrap3 PE=2 SV=1	918	0.5	0	0.5	1	0.5	0	0.75	0.25	0.333333	-1.58496	0.292893	0.533291
tr|Q7ZYR1|Q7ZYR1_XENLA	295	C	1	0	rpl3	Rpl3-prov protein OS=Xenopus laevis GN=rpl3 PE=2 SV=1	403	0.5	0	0.5	1	0.5	0	0.75	0.25	0.333333	-1.58496	0.292893	0.533291
tr|Q6NRK6|Q6NRK6_XENLA	300	C	1	0	rev1	DNA repair protein REV1 OS=Xenopus laevis GN=rev1 PE=2 SV=1	1230	0.5	0	0.5	1	0.5	0	0.75	0.25	0.333333	-1.58496	0.292893	0.533291
tr|A1A5K0|A1A5K0_XENLA	333	C	1	0	ttc7b	LOC100036811 protein OS=Xenopus laevis GN=ttc7b PE=2 SV=1	843	0.5	0	0.5	1	0.5	0	0.75	0.25	0.333333	-1.58496	0.292893	0.533291
tr|Q7ZXW4|Q7ZXW4_XENLA	344	C	1	0	prpf19	Nmp200-prov protein OS=Xenopus laevis GN=prpf19 PE=2 SV=1	504	0.5	0	0.5	1	0.5	0	0.75	0.25	0.333333	-1.58496	0.292893	0.533291
tr|B1WBD6|B1WBD6_XENLA	349	C	1	0	nsmce4a	LOC100158435 protein OS=Xenopus laevis GN=nsmce4a PE=2 SV=1	334	0.5	0	0.5	1	0.5	0	0.75	0.25	0.333333	-1.58496	0.292893	0.533291
tr|A0A068ENH4|A0A068ENH4_XENLA	1	C	5	0	FAN1	FANCD2/FANCI-associated nuclease 1 (Fragment) OS=Xenopus laevis GN=FAN1 PE=2 SV=1	1017	0.5	0	2	2	1	0	2	0.5	0.25	-2	0.204833	0.688601
sp|Q7ZWS1|DUS3L_XENLA	158	C	3	0	dus3l	tRNA-dihydrouridine(47) synthase [NAD(P)(+)]-like OS=Xenopus laevis GN=dus3l PE=2 SV=1	640	0.5	1	1	1	0.5	0	1	0.25	0.25	-2	0.204833	0.688601
tr|A1L2X9|A1L2X9_XENLA	163	C	5	0	LOC100036984	LOC100036984 protein (Fragment) OS=Xenopus laevis GN=LOC100036984 PE=2 SV=1	772	2	1	1	1	0.5	0	1	0.25	0.25	-2	0.204833	0.688601
tr|W0US81|W0US81_XENLA	221	C	0	2	rad18	E3 ubiquitin ligase (Fragment) OS=Xenopus laevis GN=rad18 PE=2 SV=1	243	0.5	0	1	1	0.5	0	1	0.25	0.25	-2	0.204833	0.688601
tr|Q76LD3|Q76LD3_XENLA	262	C	0	2	pold3	DNA polymerase delta p66 subunit OS=Xenopus laevis GN=pold3 PE=2 SV=1	454	0.5	0	1	1	0.5	0	1	0.25	0.25	-2	0.204833	0.688601
tr|D0VEW8|D0VEW8_XENLA	267	C	3	0	rev3l	DNA polymerase OS=Xenopus laevis GN=rev3l PE=2 SV=1	3139	0.5	1	1	1	0.5	0	1	0.25	0.25	-2	0.204833	0.688601
tr|Q6DFK4|Q6DFK4_XENLA	274	C	2	0	etaa1-Replication stress response protein that accumulates at DNA damage sites and promotes replication fork progression and integrity	MGC81344 protein OS=Xenopus laevis GN=etaa1 PE=2 SV=1	820	0.5	0	1	1	0.5	0	1	0.25	0.25	-2	0.204833	0.688601
sp|Q5HZP1|RNH2B_XENLA	301	C	2	0	rnaseh2b	Ribonuclease H2 subunit B OS=Xenopus laevis GN=rnaseh2b PE=2 SV=1	306	0.5	0	1	1	0.5	0	1	0.25	0.25	-2	0.204833	0.688601
sp|Q6GLS8|FRG1_XENLA	346	C	2	0	frg1	Protein FRG1 OS=Xenopus laevis GN=frg1 PE=2 SV=1	210	0.5	0	1	1	0.5	0	1	0.25	0.25	-2	0.204833	0.688601
tr|Q498E8|Q498E8_XENLA	99	C	8	2	cul4b	MGC115611 protein OS=Xenopus laevis GN=cul4b PE=2 SV=1	858	3	1	2	3	1	0	2.5	0.5	0.2	-2.32193	0.105573	0.976448
tr|Q6GPA9|Q6GPA9_XENLA	110	C	2	0	sf3a1	MGC80562 protein OS=Xenopus laevis GN=sf3a1 PE=2 SV=1	802	0.5	0	0.5	2	0.5	0	1.25	0.25	0.2	-2.32193	0.39587	0.402447
sp|O57683|SF3B1_XENLA	258	C	1	1	sf3b1	Splicing factor 3B subunit 1 OS=Xenopus laevis GN=sf3b1 PE=2 SV=1	1307	0.5	0	0.5	2	0.5	0	1.25	0.25	0.2	-2.32193	0.39587	0.402447
sp|Q8JHV9|BIR7A_XENLA	293	C	1	3	birc7-a	Baculoviral IAP repeat-containing protein 7-A OS=Xenopus laevis GN=birc7-a PE=1 SV=1	401	0.5	1	1	2	0.5	0	1.5	0.25	0.166667	-2.58496	0.198727	0.701742
sp|Q6P6Z0|DDB1_XENLA	139	C	15	0	ddb1	DNA damage-binding protein 1 OS=Xenopus laevis GN=ddb1 PE=2 SV=1	1140	4	3	3	4	1	0	3.5	0.5	0.142857	-2.80735	0.0513167	1.28974
tr|Q7ZTA5|Q7ZTA5_XENLA	207	C	0	3	rad17	Rad17 OS=Xenopus laevis GN=rad17 PE=2 SV=1	674	0.5	0	0.5	3	0.5	0	1.75	0.25	0.142857	-2.80735	0.437078	0.359442
sp|Q91431|NF7O_XENLA	57	C	0	6		Nuclear factor 7, ovary OS=Xenopus laevis PE=2 SV=1	610	1	1	1	3	0.5	0	2	0.25	0.125	-3	0.317839	0.497793
tr|Q6DD16|Q6DD16_XENLA	25	C	2	13	rbm39	Rnpc2-prov protein OS=Xenopus laevis GN=rbm39 PE=2 SV=1	540	3	0	5	6	1	0	5.5	0.5	0.0909091	-3.45943	0.0194193	1.71177
tr|A1L3F1|A1L3F1_XENLA	166	C	0	9	LOC398558	LOC398558 protein (Fragment) OS=Xenopus laevis GN=LOC398558 PE=2 SV=1	488	2	1	3	3	0.5	0	3	0.25	0.0833333	-3.58496	0.0577159	1.2387
